# Supplementary material for: Analysis of Long Non-Coding RNA-Mediated Regulatory Networks of Plutella xylostella in Response to Metarhizium anisopliae Infection
Source: MDPI journal article supplement (doi:10.3390/insects13100916), 2022-10-09
Supplement: s1 [file s1]

**Table S10** Top 20 GO categories enriched by *trans*-regulatory target genes of lncRNAs in Px72hCK vs Px72hT.

| GO term                                       | Number of enriched genes |
|-----------------------------------------------|--------------------------|
| Catalytic activity                            | 434                      |
| Metabolic process                             | 407                      |
| Cellular process                              | 398                      |
| Single-organism process                       | 356                      |
| Binding                                       | 346                      |
| Cell                                          | 224                      |
| Cell part                                     | 224                      |
| Organelle                                     | 155                      |
| Membrane                                      | 152                      |
| Biological regulation                         | 131                      |
| Localization                                  | 127                      |
| Macromolecular complex                        | 119                      |
| Regulation of biological process              | 117                      |
| Membrane part                                 | 111                      |
| Response to stimulus                          | 87                       |
| Cellular component organization or biogenesis | 69                       |
| Organelle part                                | 67                       |
| Transporter activity                          | 47                       |
| Signaling                                     | 46                       |
| Developmental process                         | 39                       |
