# Supplementary material for: Analysis of Long Non-Coding RNA-Mediated Regulatory Networks of Plutella xylostella in Response to Metarhizium anisopliae Infection
Source: MDPI journal article supplement (doi:10.3390/insects13100916), 2022-10-09
Supplement: s1 [file s1]

**Table S12** Top 20 pathways enriched by *trans*-regulatory target genes of lncRNAs in

Px72hCK vs Px72hT

| Pathway                                         | Number of enriched genes |
|-------------------------------------------------|--------------------------|
| Metabolic pathways                              | 600                      |
| Biosynthesis of secondary metabolites           | 207                      |
| Biosynthesis of antibiotics                     | 118                      |
| Oxidative phosphorylation                       | 110                      |
| Purine metabolism                               | 100                      |
| Lysosome                                        | 84                       |
| Microbial metabolism in diverse environments    | 76                       |
| RNA transport                                   | 70                       |
| Neuroactive ligand-receptor interaction         | 69                       |
| Protein processing in the endoplasmic reticulum | 66                       |
| Spliceosome                                     | 65                       |
| Carbon metabolism                               | 63                       |
| Peroxisome                                      | 58                       |
| Phagosome                                       | 56                       |
| Ribosome biogenesis in eukaryotes               | 47                       |
| Biosynthesis of amino acids                     | 47                       |
| Glutathione metabolism                          | 44                       |
| Fatty acid metabolism                           | 44                       |
| Endocytosis                                     | 41                       |
| Metabolism of xenobiotics by cytochrome P450    | 37                       |
