# Supplementary material for: Analysis of Long Non-Coding RNA-Mediated Regulatory Networks of Plutella xylostella in Response to Metarhizium anisopliae Infection
Source: MDPI journal article supplement (doi:10.3390/insects13100916), 2022-10-09
Supplement: s1 [file s1]

**Table S7** Top 20 pathways enriched by *cis*-regulatory target genes of lncRNAs in  
Px36hCK vs. Px36hT.

| Pathway                                      | Number of enriched genes |
|----------------------------------------------|--------------------------|
| Metabolic pathways                           | 122                      |
| Biosynthesis of secondary metabolites        | 39                       |
| Oxidative phosphorylation                    | 18                       |
| Endocytosis                                  | 17                       |
| Biosynthesis of antibiotics                  | 16                       |
| Microbial metabolism in diverse environments | 15                       |
| Neuroactive ligand-receptor interaction      | 14                       |
| Fatty acid metabolism                        | 13                       |
| Purine metabolism                            | 13                       |
| Peroxisome                                   | 12                       |
| ABC transporters                             | 11                       |
| Fatty acid biosynthesis                      | 10                       |
| Spliceosome                                  | 10                       |
| Protein processing in endoplasmic reticulum  | 10                       |
| Carbon metabolism                            | 10                       |
| Phagosome                                    | 9                        |
| Ubiquitin mediated proteolysis               | 9                        |
| Lysosome                                     | 9                        |
| Porphyrin and chlorophyll metabolism         | 8                        |
