# Supplementary material for: Analysis of Long Non-Coding RNA-Mediated Regulatory Networks of Plutella xylostella in Response to Metarhizium anisopliae Infection
Source: MDPI journal article supplement (doi:10.3390/insects13100916), 2022-10-09
Supplement: s1 [file s1]

**Table S11** Top 20 pathways enriched by *trans*-regulatory target genes of lncRNAs in

Px36hCK vs Px36hT

| Pathway                                         | Number of enriched genes |
|-------------------------------------------------|--------------------------|
| Metabolic pathways                              | 696                      |
| Biosynthesis of secondary metabolites           | 236                      |
| Biosynthesis of antibiotics                     | 133                      |
| Oxidative phosphorylation                       | 120                      |
| Microbial metabolism in diverse environments    | 101                      |
| Lysosome                                        | 89                       |
| Purine metabolism                               | 89                       |
| Neuroactive ligand-receptor interaction         | 75                       |
| Carbon metabolism                               | 75                       |
| Peroxisome                                      | 69                       |
| Phagosome                                       | 65                       |
| Protein processing in the endoplasmic reticulum | 62                       |
| Ubiquitin mediated proteolysis                  | 61                       |
| Spliceosome                                     | 57                       |
| RNA transport                                   | 56                       |
| Biosynthesis of amino acids                     | 55                       |
| Fatty acid metabolism                           | 52                       |
| Phosphatidylinositol signaling system           | 47                       |
| Endocytosis                                     | 47                       |
| FoxO signaling pathway                          | 45                       |
