# Supplementary material for: Analysis of Long Non-Coding RNA-Mediated Regulatory Networks of Plutella xylostella in Response to Metarhizium anisopliae Infection
Source: MDPI journal article supplement (doi:10.3390/insects13100916), 2022-10-09
Supplement: s1 [file s1]

**Table S4** Top 20 GO categories enriched by *cis*-regulatory target genes of lncRNAs in

Px36hCK vs. Px36hT.

| GO term                          | Number of enriched genes |
|----------------------------------|--------------------------|
| Metabolic process                | 84                       |
| Catalytic activity               | 79                       |
| Cellular process                 | 72                       |
| Single-organism process          | 66                       |
| Binding                          | 54                       |
| Cell                             | 45                       |
| Cell part                        | 45                       |
| Membrane                         | 30                       |
| Organelle                        | 28                       |
| Membrane part                    | 24                       |
| Localization                     | 22                       |
| Biological regulation            | 22                       |
| Response to stimulus             | 21                       |
| Regulation of biological process | 20                       |
| Macromolecular complex           | 18                       |
| Signaling                        | 14                       |
| Transporter activity             | 11                       |
| Organelle part                   | 10                       |
| Biogenesis                       | 9                        |
