# Supplementary material for: Analysis of Long Non-Coding RNA-Mediated Regulatory Networks of Plutella xylostella in Response to Metarhizium anisopliae Infection
Source: MDPI journal article supplement (doi:10.3390/insects13100916), 2022-10-09
Supplement: s1 [file s1]

**Table S8** Top 20 pathways enriched by *cis*-regulatory target genes of lncRNAs in  
Px72hCK vs. Px72hT.

| Pathway                                      | Number of enriched genes |
|----------------------------------------------|--------------------------|
| Metabolic pathways                           | 79                       |
| Biosynthesis of secondary metabolites        | 32                       |
| Oxidative phosphorylation                    | 14                       |
| Biosynthesis of antibiotics                  | 14                       |
| Neuroactive ligand-receptor interaction      | 12                       |
| Carbon metabolism                            | 11                       |
| Microbial metabolism in diverse environments | 11                       |
| Lysosome                                     | 9                        |
| Purine metabolism                            | 9                        |
| Protein processing in endoplasmic reticulum  | 8                        |
| Endocytosis                                  | 8                        |
| Aminoacyl-tRNA biosynthesis                  | 7                        |
| Glycerolipid metabolism                      | 7                        |
| Glutathione metabolism                       | 7                        |
| Fatty acid metabolism                        | 7                        |
| RNA transport                                | 7                        |
| Sphingolipid metabolism                      | 6                        |
| Glycerophospholipid metabolism               | 6                        |
| Wnt signaling pathway                        | 6                        |
