# Supplementary material for: Analysis of Long Non-Coding RNA-Mediated Regulatory Networks of Plutella xylostella in Response to Metarhizium anisopliae Infection
Source: MDPI journal article supplement (doi:10.3390/insects13100916), 2022-10-09
Supplement: s1 [file s1]

**Table S9** Top 20 GO categories enriched by *trans*-regulatory target genes of lncRNAs  
in Px36hCK vs Px36hT.

| GO term                                          | Number of enriched genes |
|--------------------------------------------------|--------------------------|
| Catalytic activity                               | 487                      |
| Metabolic process                                | 455                      |
| Cellular process                                 | 425                      |
| Single-organism process                          | 371                      |
| Binding                                          | 347                      |
| Cell                                             | 218                      |
| Cell part                                        | 218                      |
| Membrane                                         | 168                      |
| Organelle                                        | 137                      |
| Biological regulation                            | 136                      |
| Regulation of the biological process             | 127                      |
| Localization                                     | 123                      |
| Membrane part                                    | 120                      |
| Macromolecular complex                           | 113                      |
| Response to stimulus                             | 84                       |
| Signaling                                        | 65                       |
| Organelle part                                   | 59                       |
| Cellular component organization or<br>biogenesis | 53                       |
| Transporter activity                             | 53                       |
| Multicellular organismal process                 | 32                       |
