# Supplementary material for: Analysis of Long Non-Coding RNA-Mediated Regulatory Networks of Plutella xylostella in Response to Metarhizium anisopliae Infection
Source: Insects. 2022 Oct 9;13(10):916. doi: 10.3390/insects13100916 (PMC9604237; doi:10.3390/insects13100916)
Supplement: Supplementary file 1 [file insects-13-00916-s001.zip]

Archive with 15 entries (15 files):
- Figure S1 The lncRNA analysis pipeline.tif
- Table S1 Differentially expressed lncRNAs in Metarhizium anisopliae infected fat body tissues of Plutella xylostella at Px36hCK vs Px36hT.xlsx
- Table S10 Top 20 GO categories enriched by trans-regulatory target genes of lncRNAs in Px72hCK vs. Px72hT.pdf
- Table S11 Top 20 pathways enriched by trans-regulatory target genes of lncRNAs in Px36hCK vs Px36hT.pdf
- Table S12 Top 20 pathways enriched by trans-regulatory target genes of lncRNAs in Px72hCK vs Px72hT.pdf
- Table S13 Prediction of lncRNAs as the precursor of miRNAs in Metarhizium anisopliae-infected Plutella xylostella fat body tissues at Px36hCK vs Px36hT.xlsx
- Table S14 Prediction of lncRNAs as the precursor of miRNAs in Metarhizium anisopliae-infected Plutella xylostella fat body tissues at Px72hCK vs Px72hT.xlsx
- Table S2 Differentially expressed lncRNAs in Metarhizium anisopliae infected fat body tissues of Plutella xylostella at Px72hCK vs Px72hT.xlsx
- Table S3 Differentially expressed cis-lncRNAs in Metarhizium anisopliae infected fat body tissues of Plutella xylostella at Px36hCK vs Px36hT.xlsx
- Table S4 Top 20 GO categories enriched by cis-regulatory target genes of lncRNAs in Px36hCK vs. Px36hT.pdf
- Table S5 Differentially expressed cis-lncRNAs in Metarhizium anisopliae infected fat body tissues of Plutella xylostella at Px72hCK vs Px72hT.xlsx
- Table S6 Top 20 GO categories enriched by cis-regulatory target genes of lncRNAs in Px72hCK vs. Px72hT.pdf
- Table S7 Top 20 pathways enriched by cis-regulatory target genes of lncRNAs in Px36hCK vs. Px36hT.pdf
- Table S8 Top 20 pathways enriched by cis-regulatory target genes of lncRNAs in Px72hCK vs. Px72hT.pdf
- Table S9 Top 20 GO categories enriched by trans-regulatory target genes of lncRNAs in Px36hCK vs. Px36hT.pdf
