# Supplementary material for: Analysis of Long Non-Coding RNA-Mediated Regulatory Networks of Plutella xylostella in Response to Metarhizium anisopliae Infection
Source: Insects. 2022 Oct 9;13(10):916. doi: 10.3390/insects13100916 (PMC9604237; doi:10.3390/insects13100916)
Supplement: Supplementary file 1 [file insects-13-00916-s001.zip › Table S1 Differentially expressed lncRNAs in Metarhizium anisopliae infected fat body tissues of Plutella xylostella at Px36hCK vs Px36hT.xlsx]

## Sheet: Sheet 1
Table S1 Differentially expressed lncRNAs in Metarhizium anisopliae-infected fat body tissues of Plutella xylostella at Px36hCK vs Px36hT
lncRNA ID	Px36hCK (FPKM)	Px36hT (FPKM)	log2(Fold change)	P value	Up/Down	LncRNA family
XR_960741.1	0.001	0.933333	9.86625	1.89837e-10	Up	Intergenic
MSTRG.22113.1	11.4567	0.001	-13.4839	2.9752e-09	Down	Intergenic
MSTRG.10357.3	0.001	1.63	10.6707	1.59594e-08	Up	Intergenic
XR_960780.1	0.001	0.48	8.90689	2.81268e-08	Up	Intergenic
MSTRG.5956.1	0.001	2.48	11.2761	3.22994e-08	Up	Intergenic
MSTRG.17689.2	5.22667	0.0333333	-7.29278	1.91427e-06	Down	Bidirectional
MSTRG.40045.3	0.01	0.953333	6.57491	1.21477e-05	Up	Sense
MSTRG.9405.1	2.1	14.9067	2.8275	5.35239e-05	Up	Intergenic
