# Supplementary material for: Analysis of Long Non-Coding RNA-Mediated Regulatory Networks of Plutella xylostella in Response to Metarhizium anisopliae Infection
Source: Insects. 2022 Oct 9;13(10):916. doi: 10.3390/insects13100916 (PMC9604237; doi:10.3390/insects13100916)
Supplement: Supplementary file 1 [file insects-13-00916-s001.zip › Table S2 Differentially expressed lncRNAs in Metarhizium anisopliae infected fat body tissues of Plutella xylostella at Px72hCK vs Px72hT.xlsx]

## Sheet: Sheet 1
Table S2 Differentially expressed lncRNAs in Metarhizium anisopliae-infected fat body tissues of Plutella xylostella at Px72hCK vs Px72hT
lncRNA ID	Px72hCK (FPKM)	Px72hT (FPKM)	log2(Fold change)	P value	Up/Down	lncRNA Family
MSTRG.33965.4	0.103333	6.67333	6.01303	2.26118e-07	Up	Sense
MSTRG.22373.2	1.77667	0.001	-10.795	1.24038e-06	Down	Sense
MSTRG.33331.1	7.68	0.001	-12.9069	1.56024e-06	Down	Intergenic
MSTRG.1599.1	7.36	0.0266667	-8.10852	5.94913e-06	Down	Intergenic
MSTRG.37123.1	11.9333	0.11	-6.76135	7.03825e-06	Down	Sense
XR_960679.1	0.001	0.51	8.99435	1.82252e-05	Up	Intergenic
MSTRG.19715.1	2.53333	11.43	2.17372	3.2513e-05	Up	other
MSTRG.30259.1	0.38	3.09	3.02354	3.30769e-05	Up	Anti-sense
MSTRG.16875.3	0.001	0.56	9.12928	6.72223e-05	Up	Sense
MSTRG.20086.1	0.36	3.11333	3.11239	8.96786e-05	Up	Intergenic
