# Supplementary material for: Analysis of Long Non-Coding RNA-Mediated Regulatory Networks of Plutella xylostella in Response to Metarhizium anisopliae Infection
Source: Insects. 2022 Oct 9;13(10):916. doi: 10.3390/insects13100916 (PMC9604237; doi:10.3390/insects13100916)
Supplement: Supplementary file 1 [file insects-13-00916-s001.zip › Table S3 Differentially expressed cis-lncRNAs in Metarhizium anisopliae infected fat body tissues of Plutella xylostella at Px36hCK vs Px36hT.xlsx]

## Sheet: cis_diff.annot (2)
Table S3 Differentially expressed cis-lncRNAs in Metarhizium anisopliae-infected fat body tissues of Plutella xylostella at Px36hCK vs Px36hT
lncRNA_ID	chr	lncRNA_start	lncRNA_end	lncRNA_strand	GeneID	Gene_start	Gene_end	Gene_strand	up/down_Stream	distance	Symbol	Description	KEGG_A_class	KEGG_B_class	Pathway	K_ID	GO Component	GO Function	GO Process
MSTRG.32.1	NW_011952010.1	101254	110466	-	ncbi_105380903	96853	101004	-	UPSTREAM	249	LOC105380903	probable maleylacetoacetate isomerase 2	Metabolism;Metabolism;Metabolism	Global and overview maps;Global and overview maps;Amino acid metabolism	ko01100//Metabolic pathways;ko01120//Microbial metabolism in diverse environments;ko00350//Tyrosine metabolism	K01800;K01800;K01800	GO:0044424//intracellular part	GO:0046914//transition metal ion binding	GO:0006520//cellular amino acid metabolic process
MSTRG.145.1	NW_011952010.1	1134649	1181969	+	ncbi_105380577	1117757	1130119	-	UPSTREAM	4529	LOC105380577	low density lipoprotein receptor adapter protein 1	-	-	-	-	-	-	-
MSTRG.287.1	NW_011952010.1	2256123	2256514	-	ncbi_105393175	2247837	2252417	+	DOWNSTREAM	3705	LOC105393175	membrane alanyl aminopeptidase-like	Metabolism;Metabolism	Global and overview maps;Metabolism of other amino acids	ko01100//Metabolic pathways;ko00480//Glutathione metabolism	K11140;K11140	-	-	-
MSTRG.287.1	NW_011952010.1	2256123	2256514	-	ncbi_105386349	2234211	2247597	+	DOWNSTREAM	8525	LOC105386349	membrane alanyl aminopeptidase-like	Metabolism;Metabolism	Global and overview maps;Metabolism of other amino acids	ko01100//Metabolic pathways;ko00480//Glutathione metabolism	K11140;K11140	-	-	-
MSTRG.344.1	NW_011952010.1	2722368	2723809	-	ncbi_105387924	2715557	2717957	+	DOWNSTREAM	4410	LOC105387924	UPF0691 protein C9orf116	-	-	-	-	-	-	-
MSTRG.344.1	NW_011952010.1	2722368	2723809	-	ncbi_105394023	2693041	2713877	-	UPSTREAM	8490	LOC105394023	uncharacterized LOC105394023	-	-	-	-	-	-	-
MSTRG.344.1	NW_011952010.1	2722368	2723809	-	ncbi_105394127	2728619	2797466	-	DOWNSTREAM	4809	LOC105394127	synapsin	-	-	-	-	-	-	-
MSTRG.358.1	NW_011952010.1	2844072	2846117	+	ncbi_105394215	2810047	2843985	+	DOWNSTREAM	86	LOC105394215	uncharacterized LOC105394215	-	-	-	-	-	-	-
MSTRG.378.3	NW_011952010.1	2942542	2946581	+	ncbi_105394803	2947293	2972895	+	UPSTREAM	711	LOC105394803	PDZ and LIM domain protein Zasp-like	-	-	-	-	-	-	-
MSTRG.403.1	NW_011952010.1	3073523	3078113	-	ncbi_105395304	3086021	3107148	+	UPSTREAM	7907	LOC105395304	uncharacterized LOC105395304	-	-	-	-	-	-	-
MSTRG.404.1	NW_011952010.1	3078253	3079391	-	ncbi_105395304	3086021	3107148	+	UPSTREAM	6629	LOC105395304	uncharacterized LOC105395304	-	-	-	-	-	-	-
MSTRG.627.1	NW_011952011.1	1681977	1682588	+	ncbi_105398249	1678973	1680778	+	DOWNSTREAM	1198	LOC105398249	trypsin	-	-	-	-	-	-	-
MSTRG.627.1	NW_011952011.1	1681977	1682588	+	ncbi_105380337	1659146	1675232	+	DOWNSTREAM	6744	LOC105380337	uncharacterized LOC105380337	-	-	-	-	-	-	-
MSTRG.627.1	NW_011952011.1	1681977	1682588	+	ncbi_105398265	1669367	1672977	+	DOWNSTREAM	8999	LOC105398265	trypsin CFT-1-like	Environmental Information Processing	Signaling molecules and interaction	ko04080//Neuroactive ligand-receptor interaction	K01312	-	-	-
MSTRG.630.1	NW_011952011.1	1688439	1697014	+	ncbi_105398249	1678973	1680778	+	DOWNSTREAM	7660	LOC105398249	trypsin	-	-	-	-	-	-	-
MSTRG.630.1	NW_011952011.1	1688439	1697014	+	ncbi_105398284	1697329	1703064	+	UPSTREAM	314	LOC105398284	uncharacterized LOC105398284	-	-	-	-	-	-	-
MSTRG.639.2	NW_011952011.1	1735682	1740216	-	ncbi_105380347	1728100	1728951	-	UPSTREAM	6730	LOC105380347	uncharacterized LOC105380347	-	-	-	-	-	-	-
MSTRG.649.1	NW_011952011.1	1807847	1812335	-	ncbi_105380358	1818980	1822105	+	UPSTREAM	6644	LOC105380358	cytoplasmic dynein 1 light intermediate chain 2-like	Cellular Processes	Transport and catabolism	ko04145//Phagosome	K10416	-	-	-
MSTRG.653.1	NW_011952011.1	1817064	1817623	-	ncbi_105380358	1818980	1822105	+	UPSTREAM	1356	LOC105380358	cytoplasmic dynein 1 light intermediate chain 2-like	Cellular Processes	Transport and catabolism	ko04145//Phagosome	K10416	-	-	-
MSTRG.653.1	NW_011952011.1	1817064	1817623	-	ncbi_105380368	1826385	1827424	+	UPSTREAM	8761	LOC105380368	DNA repair protein XRCC3	Genetic Information Processing	Replication and repair	ko03440//Homologous recombination	K10880	-	-	-
MSTRG.670.1	NW_011952011.1	1895456	1895846	-	ncbi_105398410	1885138	1893029	-	UPSTREAM	2426	LOC105398410	alpha-tocopherol transfer protein-like	-	-	-	-	-	-	-
MSTRG.670.1	NW_011952011.1	1895456	1895846	-	ncbi_105398419	1896243	1908616	-	DOWNSTREAM	396	LOC105398419	alpha-tocopherol transfer protein-like	-	-	-	-	-	-	-
MSTRG.696.1	NW_011952011.1	2053660	2054542	-	ncbi_105398541	2049966	2051810	-	UPSTREAM	1849	LOC105398541	uncharacterized protein C18orf63-like	-	-	-	-	-	-	-
MSTRG.696.1	NW_011952011.1	2053660	2054542	-	ncbi_105398551	2055876	2067937	-	DOWNSTREAM	1333	LOC105398551	CDK5 regulatory subunit-associated protein 2-like	-	-	-	-	-	-	-
MSTRG.719.1	NW_011952011.1	2217622	2218456	-	ncbi_105398654	2226794	2244203	+	UPSTREAM	8337	LOC105398654	xaa-Pro dipeptidase-like	-	-	-	-	-	-	-
MSTRG.738.1	NW_011952011.1	2335198	2338036	-	ncbi_105380431	2306347	2334206	-	UPSTREAM	991	LOC105380431	alpha-actinin	-	-	-	-	-	-	-
MSTRG.738.1	NW_011952011.1	2335198	2338036	-	ncbi_105380439	2339491	2440260	-	DOWNSTREAM	1454	LOC105380439	uncharacterized LOC105380439	-	-	-	-	-	-	-
MSTRG.740.1	NW_011952011.1	2337051	2338017	+	ncbi_105380431	2306347	2334206	-	UPSTREAM	2844	LOC105380431	alpha-actinin	-	-	-	-	-	-	-
MSTRG.740.1	NW_011952011.1	2337051	2338017	+	ncbi_105380439	2339491	2440260	-	DOWNSTREAM	1473	LOC105380439	uncharacterized LOC105380439	-	-	-	-	-	-	-
MSTRG.792.1	NW_011952011.1	2779888	2825750	+	ncbi_105398792	2835483	2837197	-	DOWNSTREAM	9732	LOC105398792	mucin-1-like	-	-	-	-	-	-	-
XR_961233.1	NW_011952011.1	2838078	2839142	-	ncbi_105398792	2835483	2837197	-	UPSTREAM	880	LOC105398792	mucin-1-like	-	-	-	-	-	-	-
XR_961233.1	NW_011952011.1	2838078	2839142	-	ncbi_105398810	2839900	2845049	+	UPSTREAM	757	LOC105398810	uncharacterized LOC105398810	-	-	-	-	-	-	-
XR_961233.1	NW_011952011.1	2838078	2839142	-	ncbi_105398770	2779888	2832780	+	DOWNSTREAM	5297	LOC105398770	uncharacterized LOC105398770	-	-	-	-	-	-	-
XR_961233.1	NW_011952011.1	2838078	2839142	-	ncbi_105398828	2845122	2857293	-	DOWNSTREAM	5979	LOC105398828	uncharacterized LOC105398828	-	-	-	-	-	-	-
MSTRG.817.1	NW_011952011.1	3011894	3013728	+	ncbi_105380005	3007731	3010001	+	DOWNSTREAM	1892	LOC105380005	uncharacterized LOC105380005	-	-	-	-	-	-	-
MSTRG.817.1	NW_011952011.1	3011894	3013728	+	ncbi_105380014	3019949	3029871	+	UPSTREAM	6220	LOC105380014	protein tipE	-	-	-	-	-	-	-
MSTRG.871.1	NW_011952012.1	27761	28868	-	ncbi_105381636	19	19258	-	UPSTREAM	8502	LOC105381636	mannan-binding lectin serine protease 2-like	-	-	-	-	-	-	-
MSTRG.921.2	NW_011952012.1	369369	372477	+	ncbi_105381701	380596	388312	-	DOWNSTREAM	8118	LOC105381701	uncharacterized LOC105381701	-	-	-	-	-	-	-
MSTRG.949.1	NW_011952012.1	476187	476982	-	ncbi_105381712	424692	468712	+	DOWNSTREAM	7474	LOC105381712	rho GTPase-activating protein 100F	-	-	-	-	-	-	-
MSTRG.1036.1	NW_011952012.1	1232389	1233608	-	ncbi_105380969	1235777	1236784	-	DOWNSTREAM	2168	LOC105380969	39S ribosomal protein L14	Genetic Information Processing	Translation	ko03010//Ribosome	K02874	-	-	-
MSTRG.1059.2	NW_011952012.1	1529223	1530090	+	MSTRG.1061	1533184	1535210	+	UPSTREAM	3093	--	hypothetical protein KGM_15448 [Danaus plexippus]	-	-	-	-	-	-	-
MSTRG.1059.2	NW_011952012.1	1529223	1530090	+	ncbi_105381846	1535841	1536770	-	DOWNSTREAM	5750	LOC105381846	L-asparaginase-like	-	-	-	-	-	-	-
MSTRG.1059.3	NW_011952012.1	1529321	1530000	+	MSTRG.1061	1533184	1535210	+	UPSTREAM	3183	--	hypothetical protein KGM_15448 [Danaus plexippus]	-	-	-	-	-	-	-
MSTRG.1059.3	NW_011952012.1	1529321	1530000	+	ncbi_105381846	1535841	1536770	-	DOWNSTREAM	5840	LOC105381846	L-asparaginase-like	-	-	-	-	-	-	-
MSTRG.1065.1	NW_011952012.1	1542259	1546389	-	MSTRG.1061	1533184	1535210	+	DOWNSTREAM	7048	--	hypothetical protein KGM_15448 [Danaus plexippus]	-	-	-	-	-	-	-
MSTRG.1065.1	NW_011952012.1	1542259	1546389	-	ncbi_105381846	1535841	1536770	-	UPSTREAM	5488	LOC105381846	L-asparaginase-like	-	-	-	-	-	-	-
MSTRG.1065.1	NW_011952012.1	1542259	1546389	-	MSTRG.1067	1546433	1549025	+	UPSTREAM	43	--	gag-pol protein, partial [Lasius niger]	-	-	-	-	-	-	-
MSTRG.1161.1	NW_011952012.1	1989669	1990505	+	ncbi_105381155	1903201	1988359	-	UPSTREAM	1309	LOC105381155	dynein heavy chain 5	-	-	-	-	GO:0005875//microtubule associated complex	GO:0003774//motor activity;GO:0032550//purine ribonucleoside binding	GO:0007017//microtubule-based process
MSTRG.1197.1	NW_011952012.1	2245706	2248437	-	ncbi_105381943	2236301	2238581	+	DOWNSTREAM	7124	LOC105381943	uncharacterized LOC105381943	-	-	-	-	-	-	-
MSTRG.1197.1	NW_011952012.1	2245706	2248437	-	MSTRG.1195	2238631	2239722	+	DOWNSTREAM	5983	--	similar to CG2519 [Heliconius melpomene]	-	-	-	-	-	-	-
MSTRG.1197.2	NW_011952012.1	2246407	2247961	-	ncbi_105381943	2236301	2238581	+	DOWNSTREAM	7825	LOC105381943	uncharacterized LOC105381943	-	-	-	-	-	-	-
MSTRG.1197.2	NW_011952012.1	2246407	2247961	-	MSTRG.1195	2238631	2239722	+	DOWNSTREAM	6684	--	similar to CG2519 [Heliconius melpomene]	-	-	-	-	-	-	-
MSTRG.1275.1	NW_011952012.1	2617784	2619493	-	ncbi_105381612	2629182	2653633	-	DOWNSTREAM	9688	LOC105381612	dual specificity tyrosine-phosphorylation-regulated kinase 2	-	-	-	-	-	-	-
MSTRG.1276.1	NW_011952012.1	2619613	2620468	-	ncbi_105381612	2629182	2653633	-	DOWNSTREAM	8713	LOC105381612	dual specificity tyrosine-phosphorylation-regulated kinase 2	-	-	-	-	-	-	-
MSTRG.1320.1	NW_011952013.1	206014	221538	+	ncbi_105382210	190567	201862	+	DOWNSTREAM	4151	LOC105382210	ATP-binding cassette sub-family G member 5	-	-	-	-	-	GO:0016787//hydrolase activity	-
MSTRG.1335.2	NW_011952013.1	516767	518921	+	ncbi_105382270	521419	523804	+	UPSTREAM	2497	LOC105382270	fibrohexamerin-like	-	-	-	-	-	-	-
MSTRG.1335.2	NW_011952013.1	516767	518921	+	ncbi_105383050	524685	540137	+	UPSTREAM	5763	LOC105383050	uncharacterized LOC105383050	Metabolism;Metabolism	Global and overview maps;Glycan biosynthesis and metabolism	ko01100//Metabolic pathways;ko00601//Glycosphingolipid biosynthesis - lacto and neolacto series	K07819;K07819	-	-	-
MSTRG.1335.3	NW_011952013.1	518974	520596	+	ncbi_105382270	521419	523804	+	UPSTREAM	822	LOC105382270	fibrohexamerin-like	-	-	-	-	-	-	-
MSTRG.1335.3	NW_011952013.1	518974	520596	+	ncbi_105383050	524685	540137	+	UPSTREAM	4088	LOC105383050	uncharacterized LOC105383050	Metabolism;Metabolism	Global and overview maps;Glycan biosynthesis and metabolism	ko01100//Metabolic pathways;ko00601//Glycosphingolipid biosynthesis - lacto and neolacto series	K07819;K07819	-	-	-
MSTRG.1360.1	NW_011952013.1	674804	682338	+	ncbi_105382330	683164	684098	-	DOWNSTREAM	825	LOC105382330	NADH dehydrogenase [ubiquinone] iron-sulfur protein 3	Metabolism;Metabolism	Global and overview maps;Energy metabolism	ko01100//Metabolic pathways;ko00190//Oxidative phosphorylation	K03936;K03936	-	-	-
MSTRG.1414.1	NW_011952013.1	1325418	1327736	-	ncbi_105382461	1328622	1329746	+	UPSTREAM	885	LOC105382461	ubiquitin-conjugating enzyme E2 C	Genetic Information Processing	Folding, sorting and degradation	ko04120//Ubiquitin mediated proteolysis	K06688	-	GO:0003824//catalytic activity	-
MSTRG.1414.1	NW_011952013.1	1325418	1327736	-	ncbi_105383212	1330729	1334455	-	DOWNSTREAM	2992	LOC105383212	syntaxin-16	Genetic Information Processing	Folding, sorting and degradation	ko04130//SNARE interactions in vesicular transport	K08489	-	-	-
MSTRG.1414.1	NW_011952013.1	1325418	1327736	-	ncbi_105383223	1334600	1337750	+	UPSTREAM	6863	LOC105383223	actin-related protein 8-like	-	-	-	-	-	-	-
XR_960535.1	NW_011952013.1	1345564	1346957	-	ncbi_105383223	1334600	1337750	+	DOWNSTREAM	7813	LOC105383223	actin-related protein 8-like	-	-	-	-	-	-	-
MSTRG.1457.1	NW_011952013.1	1634997	1639263	+	ncbi_105383317	1627257	1634521	+	DOWNSTREAM	475	LOC105383317	serine/threonine-protein kinase STK11-like	Environmental Information Processing;Environmental Information Processing	Signal transduction;Signal transduction	ko04068//FoxO signaling pathway;ko04150//mTOR signaling pathway	K07298;K07298	-	-	-
MSTRG.1459.1	NW_011952013.1	1687323	1698211	-	ncbi_105383338	1698360	1722977	-	DOWNSTREAM	148	LOC105383338	elongation of very long chain fatty acids protein AAEL008004-like	Metabolism;Metabolism	Global and overview maps;Lipid metabolism	ko01110//Biosynthesis of secondary metabolites;ko00062//Fatty acid elongation	K10250;K10250	GO:0031224//intrinsic component of membrane	GO:0003824//catalytic activity	GO:0006631//fatty acid metabolic process
MSTRG.1497.1	NW_011952013.1	1943160	1949148	-	ncbi_105382784	1955676	1970262	+	UPSTREAM	6527	LOC105382784	MAP kinase-interacting serine/threonine-protein kinase 1	-	-	-	-	-	-	-
MSTRG.1513.1	NW_011952013.1	2052698	2123410	-	ncbi_105382837	2131779	2134391	+	UPSTREAM	8368	LOC105382837	ubiquitin-conjugating enzyme E2 G1	Genetic Information Processing;Genetic Information Processing	Folding, sorting and degradation;Folding, sorting and degradation	ko04141//Protein processing in endoplasmic reticulum;ko04120//Ubiquitin mediated proteolysis	K10575;K10575	-	GO:0019787//ubiquitin-like protein transferase activity;GO:0034061//DNA polymerase activity	GO:0006259//DNA metabolic process;GO:0016567//protein ubiquitination;GO:0034645//cellular macromolecule biosynthetic process
MSTRG.1513.1	NW_011952013.1	2052698	2123410	-	ncbi_105383403	2038339	2048392	+	DOWNSTREAM	4305	LOC105383403	elongation of very long chain fatty acids protein AAEL008004-like	-	-	-	-	-	-	-
XR_960589.1	NW_011952014.1	156736	157237	+	ncbi_105383558	160316	174678	-	DOWNSTREAM	3078	LOC105383558	ATP-dependent RNA helicase bel	-	-	-	-	-	-	-
MSTRG.1651.1	NW_011952014.1	818339	819943	-	ncbi_105383695	786443	811269	-	UPSTREAM	7069	LOC105383695	solute carrier family 28 member 3-like	-	-	-	-	-	-	-
MSTRG.1663.2	NW_011952014.1	978819	979553	-	ncbi_105383788	959400	977964	-	UPSTREAM	854	LOC105383788	4-coumarate--CoA ligase 1-like	-	-	-	-	-	-	-
MSTRG.1663.2	NW_011952014.1	978819	979553	-	ncbi_105383797	981948	998590	-	DOWNSTREAM	2394	LOC105383797	mothers against decapentaplegic homolog 3-like	Cellular Processes;Environmental Information Processing;Environmental Information Processing	Transport and catabolism;Signal transduction;Signal transduction	ko04144//Endocytosis;ko04068//FoxO signaling pathway;ko04350//TGF-beta signaling pathway	K04500;K04500;K04500	-	-	-
MSTRG.1732.1	NW_011952014.1	1734894	1740253	+	ncbi_105383879	1721765	1728770	+	DOWNSTREAM	6123	LOC105383879	uncharacterized LOC105383879	-	-	-	-	-	-	-
MSTRG.1735.1	NW_011952014.1	1743493	1744890	-	ncbi_105383886	1754465	1763246	-	DOWNSTREAM	9574	LOC105383886	zinc finger protein 93-like	-	-	-	-	-	-	-
MSTRG.1746.1	NW_011952014.1	1776348	1779907	+	ncbi_105383935	1788053	1798636	+	UPSTREAM	8145	LOC105383935	DNA replication licensing factor Mcm3	Genetic Information Processing	Replication and repair	ko03030//DNA replication	K02541	GO:0043231//intracellular membrane-bounded organelle;GO:0043234//protein complex	GO:0003676//nucleic acid binding;GO:0004386//helicase activity;GO:0032550//purine ribonucleoside binding	GO:0006259//DNA metabolic process;GO:0032392//DNA geometric change
MSTRG.1746.1	NW_011952014.1	1776348	1779907	+	ncbi_105383927	1783172	1787247	+	UPSTREAM	3264	LOC105383927	synaptic vesicle 2-related protein-like	-	-	-	-	-	-	-
MSTRG.1797.1	NW_011952014.1	2157768	2159108	-	ncbi_105384605	2140707	2150543	-	UPSTREAM	7224	LOC105384605	organic cation transporter protein-like	-	-	-	-	-	-	-
MSTRG.1819.1	NW_011952014.1	2290869	2294293	-	ncbi_105384162	2285028	2290114	+	DOWNSTREAM	754	LOC105384162	inositol oxygenase-like	Metabolism;Metabolism	Carbohydrate metabolism;Carbohydrate metabolism	ko00562//Inositol phosphate metabolism;ko00053//Ascorbate and aldarate metabolism	K00469;K00469	GO:0044424//intracellular part	GO:0016701//oxidoreductase activity, acting on single donors with incorporation of molecular oxygen	GO:0006020//inositol metabolic process
MSTRG.1819.1	NW_011952014.1	2290869	2294293	-	MSTRG.1820	2294804	2296568	+	UPSTREAM	510	miox	PREDICTED: inositol oxygenase-like [Plutella xylostella]	Metabolism;Metabolism	Carbohydrate metabolism;Carbohydrate metabolism	ko00562//Inositol phosphate metabolism;ko00053//Ascorbate and aldarate metabolism	K00469;K00469	GO:0044424//intracellular part	GO:0016701//oxidoreductase activity, acting on single donors with incorporation of molecular oxygen	GO:0006020//inositol metabolic process
MSTRG.1819.1	NW_011952014.1	2290869	2294293	-	ncbi_105384664	2303856	2329777	-	DOWNSTREAM	9562	LOC105384664	cytospin-A-like	-	-	-	-	-	-	-
MSTRG.1823.1	NW_011952014.1	2331978	2337158	-	ncbi_105384664	2303856	2329777	-	UPSTREAM	2200	LOC105384664	cytospin-A-like	-	-	-	-	-	-	-
MSTRG.1830.1	NW_011952014.1	2400442	2405673	+	ncbi_105384716	2409903	2443670	-	DOWNSTREAM	4229	LOC105384716	uncharacterized LOC105384716	Metabolism	Amino acid metabolism	ko00310//Lysine degradation	K11421	-	-	-
MSTRG.1833.1	NW_011952014.1	2451565	2453025	+	ncbi_105384716	2409903	2443670	-	UPSTREAM	7894	LOC105384716	uncharacterized LOC105384716	Metabolism	Amino acid metabolism	ko00310//Lysine degradation	K11421	-	-	-
MSTRG.1833.1	NW_011952014.1	2451565	2453025	+	ncbi_105384726	2460736	2479818	+	UPSTREAM	7710	LOC105384726	protein argonaute-2-like	-	-	-	-	-	-	-
MSTRG.1843.2	NW_011952014.1	2515166	2517165	-	ncbi_105384756	2518954	2532461	-	DOWNSTREAM	1788	LOC105384756	PCTP-like protein	-	-	-	-	-	-	-
MSTRG.1950.1	NW_011952015.1	840775	843705	+	ncbi_105384905	835715	838494	+	DOWNSTREAM	2280	LOC105384905	serine/threonine-protein phosphatase 2B catalytic subunit 2-like	Environmental Information Processing	Signal transduction	ko04310//Wnt signaling pathway	K04348	-	GO:0003824//catalytic activity	GO:0006796//phosphate-containing compound metabolic process
MSTRG.1950.1	NW_011952015.1	840775	843705	+	ncbi_105385516	847978	860884	-	DOWNSTREAM	4272	LOC105385516	vigilin	-	-	-	-	-	-	-
MSTRG.2041.1	NW_011952015.1	1687865	1690506	+	ncbi_105385629	1671672	1683689	-	UPSTREAM	4175	LOC105385629	lachesin-like	-	-	-	-	-	-	-
MSTRG.2041.1	NW_011952015.1	1687865	1690506	+	MSTRG.2044	1695305	1696640	+	UPSTREAM	4798	--	trypsin-like serine proteinase 2 [Plutella xylostella]	Environmental Information Processing;Organismal Systems;Human Diseases;Organismal Systems	Signaling molecules and interaction;Digestive system;Infectious diseases;Digestive system	ko04080//Neuroactive ligand-receptor interaction;ko04972//Pancreatic secretion;ko05164//Influenza A;ko04974//Protein digestion and absorption	K01312;K01312;K01312;K01312	-	-	-
MSTRG.2218.1	NW_011952016.1	369210	379427	+	MSTRG.2221	388195	394919	-	DOWNSTREAM	8767	Tf2-12	reverse ribonuclease integrase, partial [Lasius niger]	-	-	-	-	-	-	-
MSTRG.2219.1	NW_011952016.1	369252	379424	-	MSTRG.2221	388195	394919	-	DOWNSTREAM	8770	Tf2-12	reverse ribonuclease integrase, partial [Lasius niger]	-	-	-	-	-	-	-
MSTRG.2251.1	NW_011952016.1	661704	683083	+	MSTRG.2255	688841	694161	+	UPSTREAM	5757	--	Carboxypeptidase O [Papilio machaon]	-	-	-	-	-	-	-
MSTRG.2251.1	NW_011952016.1	661704	683083	+	MSTRG.2254	683356	688608	+	UPSTREAM	272	AGAP009593	Carboxypeptidase O [Papilio machaon]	-	-	-	-	-	-	-
MSTRG.2258.1	NW_011952016.1	713873	720060	-	ncbi_105386107	705998	709156	+	DOWNSTREAM	4716	LOC105386107	zinc carboxypeptidase-like	-	-	-	-	-	-	-
MSTRG.2258.1	NW_011952016.1	713873	720060	-	ncbi_105386123	720333	725974	+	UPSTREAM	272	LOC105386123	zinc carboxypeptidase-like	-	-	-	-	-	-	-
MSTRG.2454.1	NW_011952016.1	2358414	2367698	-	ncbi_105387129	2370962	2388633	-	DOWNSTREAM	3263	LOC105387129	uncharacterized LOC105387129	-	-	-	-	-	-	-
MSTRG.2503.2	NW_011952017.1	156261	156868	+	ncbi_105387218	142327	147398	-	UPSTREAM	8862	LOC105387218	phosphatidylserine synthase 1	Metabolism;Metabolism	Global and overview maps;Lipid metabolism	ko01100//Metabolic pathways;ko00564//Glycerophospholipid metabolism	K08729;K08729	-	-	-
MSTRG.2503.2	NW_011952017.1	156261	156868	+	ncbi_105387239	151299	152458	+	DOWNSTREAM	3802	LOC105387239	60S ribosomal protein L35	Genetic Information Processing	Translation	ko03010//Ribosome	K02918	GO:0030529//intracellular ribonucleoprotein complex	-	GO:0010467//gene expression
MSTRG.2503.2	NW_011952017.1	156261	156868	+	ncbi_105387250	154215	155316	+	DOWNSTREAM	944	LOC105387250	actin-related protein 2/3 complex subunit 5	Cellular Processes	Transport and catabolism	ko04144//Endocytosis	K05754	-	-	-
MSTRG.2503.2	NW_011952017.1	156261	156868	+	ncbi_105388386	161156	190651	-	DOWNSTREAM	4287	LOC105388386	protein timeless	Organismal Systems	Environmental adaptation	ko04711//Circadian rhythm - fly	K12074	-	-	-
XR_960773.1	NW_011952017.1	681940	727658	-	ncbi_105388445	672081	680469	-	UPSTREAM	1470	LOC105388445	uncharacterized LOC105388445	-	-	-	-	-	-	-
XR_960773.1	NW_011952017.1	681940	727658	-	ncbi_105388452	737414	745180	-	DOWNSTREAM	9755	LOC105388452	uncharacterized LOC105388452	-	-	-	-	-	-	-
MSTRG.2637.1	NW_011952017.1	1130135	1130723	-	ncbi_105388573	1135719	1137651	+	UPSTREAM	4995	LOC105388573	uncharacterized LOC105388573	-	-	-	-	-	-	-
MSTRG.2646.1	NW_011952017.1	1179009	1180523	+	ncbi_105388605	1187341	1191087	-	DOWNSTREAM	6817	LOC105388605	translational activator GCN1-like	-	-	-	-	-	-	-
MSTRG.2661.2	NW_011952017.1	1299810	1302059	-	ncbi_105387866	1307806	1311560	-	DOWNSTREAM	5746	LOC105387866	peptidoglycan-recognition protein LB-like	-	-	-	-	-	-	-
MSTRG.2666.1	NW_011952017.1	1315640	1317265	-	ncbi_105387866	1307806	1311560	-	UPSTREAM	4079	LOC105387866	peptidoglycan-recognition protein LB-like	-	-	-	-	-	-	-
MSTRG.2708.1	NW_011952017.1	1571854	1573149	+	ncbi_105388106	1565806	1568070	+	DOWNSTREAM	3783	LOC105388106	dnaJ homolog subfamily C member 30	-	-	-	-	-	-	-
MSTRG.2708.1	NW_011952017.1	1571854	1573149	+	ncbi_105388117	1573198	1575314	+	UPSTREAM	48	LOC105388117	N-acetylglucosaminyl-phosphatidylinositol de-N-acetylase	Metabolism;Metabolism	Global and overview maps;Glycan biosynthesis and metabolism	ko01100//Metabolic pathways;ko00563//Glycosylphosphatidylinositol(GPI)-anchor biosynthesis	K03434;K03434	-	-	-
MSTRG.2713.1	NW_011952017.1	1595953	1600419	-	ncbi_105388691	1606613	1614866	-	DOWNSTREAM	6193	LOC105388691	E3 ubiquitin-protein ligase siah-1-like	Genetic Information Processing;Environmental Information Processing	Folding, sorting and degradation;Signal transduction	ko04120//Ubiquitin mediated proteolysis;ko04310//Wnt signaling pathway	K04506;K04506	-	-	-
MSTRG.2738.1	NW_011952017.1	1766291	1770474	+	ncbi_105388720	1729166	1765596	+	DOWNSTREAM	694	LOC105388720	probable sodium/potassium/calcium exchanger CG1090	-	-	-	-	-	-	-
MSTRG.2811.1	NW_011952018.1	247062	247921	-	ncbi_105388865	247962	268173	-	DOWNSTREAM	40	LOC105388865	receptor expression-enhancing protein 1	-	-	-	-	-	-	-
MSTRG.2828.1	NW_011952018.1	355837	363461	-	ncbi_105389503	371007	398172	-	DOWNSTREAM	7545	LOC105389503	dynein heavy chain 2	-	-	-	-	-	-	-
MSTRG.2829.1	NW_011952018.1	355842	363462	+	ncbi_105389503	371007	398172	-	DOWNSTREAM	7544	LOC105389503	dynein heavy chain 2	-	-	-	-	-	-	-
MSTRG.2991.1	NW_011952018.1	1442084	1448967	+	ncbi_105389092	1434106	1437349	-	UPSTREAM	4734	LOC105389092	methionine-R-sulfoxide reductase B1	-	-	-	-	-	-	-
MSTRG.2991.1	NW_011952018.1	1442084	1448967	+	ncbi_105389112	1453145	1465016	-	DOWNSTREAM	4177	LOC105389112	uncharacterized LOC105389112	-	-	-	-	-	-	-
MSTRG.2991.2	NW_011952018.1	1442098	1448936	+	ncbi_105389092	1434106	1437349	-	UPSTREAM	4748	LOC105389092	methionine-R-sulfoxide reductase B1	-	-	-	-	-	-	-
MSTRG.2991.2	NW_011952018.1	1442098	1448936	+	ncbi_105389112	1453145	1465016	-	DOWNSTREAM	4208	LOC105389112	uncharacterized LOC105389112	-	-	-	-	-	-	-
MSTRG.3223.1	NW_011952019.1	580623	584577	-	ncbi_105390076	590412	592933	+	UPSTREAM	5834	LOC105390076	uncharacterized LOC105390076	-	-	-	-	-	-	-
MSTRG.3223.1	NW_011952019.1	580623	584577	-	ncbi_105390783	564459	578530	+	DOWNSTREAM	2092	LOC105390783	uncharacterized abhydrolase domain-containing protein DDB_G0269086-like	-	-	-	-	-	-	-
XR_960890.1	NW_011952019.1	1095822	1101301	+	ncbi_105390396	1087911	1092553	+	DOWNSTREAM	3268	LOC105390396	V-type proton ATPase 16 kDa proteolipid subunit	Metabolism;Metabolism;Cellular Processes;Cellular Processes	Global and overview maps;Energy metabolism;Transport and catabolism;Transport and catabolism	ko01100//Metabolic pathways;ko00190//Oxidative phosphorylation;ko04142//Lysosome;ko04145//Phagosome	K02155;K02155;K02155;K02155	GO:0031224//intrinsic component of membrane;GO:0033179//proton-transporting V-type ATPase, V0 domain;GO:0044444//cytoplasmic part	GO:0015078//hydrogen ion transmembrane transporter activity	GO:0015988//energy coupled proton transmembrane transport, against electrochemical gradient;GO:0035114//imaginal disc-derived appendage morphogenesis
XR_960890.1	NW_011952019.1	1095822	1101301	+	ncbi_105390832	1102392	1123831	+	UPSTREAM	1090	LOC105390832	low-density lipoprotein receptor-related protein 4-like	-	-	-	-	-	-	-
MSTRG.3342.1	NW_011952019.1	1251372	1253430	-	ncbi_105390441	1254644	1256117	+	UPSTREAM	1213	LOC105390441	transcription initiation factor TFIID subunit 12	Genetic Information Processing	Transcription	ko03022//Basal transcription factors	K03126	-	-	-
MSTRG.3342.1	NW_011952019.1	1251372	1253430	-	ncbi_105390461	1262855	1264196	-	DOWNSTREAM	9424	LOC105390461	short coiled-coil protein homolog	-	-	-	-	-	-	-
MSTRG.3342.1	NW_011952019.1	1251372	1253430	-	ncbi_105390431	1242493	1250133	+	DOWNSTREAM	1238	LOC105390431	nuclear RNA export factor 2-like	Genetic Information Processing;Genetic Information Processing;Genetic Information Processing	Translation;Translation;Translation	ko03013//RNA transport;ko03015//mRNA surveillance pathway;ko03008//Ribosome biogenesis in eukaryotes	K14284;K14284;K14284	-	-	-
MSTRG.3342.1	NW_011952019.1	1251372	1253430	-	ncbi_105390451	1256257	1261971	-	DOWNSTREAM	2826	LOC105390451	uncharacterized LOC105390451	-	-	-	-	-	-	-
MSTRG.3377.1	NW_011952019.1	1421237	1421868	-	ncbi_105390578	1425469	1440210	+	UPSTREAM	3600	LOC105390578	multidrug resistance protein 1-like	Environmental Information Processing	Membrane transport	ko02010//ABC transporters	K05658	-	-	-
MSTRG.3441.1	NW_011952019.1	1735960	1737206	-	ncbi_105390684	1746182	1752258	+	UPSTREAM	8975	LOC105390684	high mobility group protein DSP1-like	Genetic Information Processing	Replication and repair	ko03410//Base excision repair	K10802	-	-	-
MSTRG.3456.1	NW_011952019.1	1917124	2134040	-	ncbi_105390966	2136271	2257233	-	DOWNSTREAM	2230	LOC105390966	uncharacterized LOC105390966	-	-	-	-	-	-	-
MSTRG.3457.1	NW_011952019.1	1917692	2135852	+	ncbi_105390966	2136271	2257233	-	DOWNSTREAM	418	LOC105390966	uncharacterized LOC105390966	-	-	-	-	-	-	-
XR_960923.1	NW_011952020.1	457132	461098	-	ncbi_105391075	469858	473848	-	DOWNSTREAM	8759	LOC105391075	intraflagellar transport protein 20 homolog	-	-	-	-	-	-	-
XR_960928.1	NW_011952020.1	1056938	1127942	-	ncbi_105391930	1052080	1056656	-	UPSTREAM	281	LOC105391930	uncharacterized LOC105391930	-	-	-	-	-	-	-
MSTRG.3628.1	NW_011952020.1	1282426	1285777	-	ncbi_105391978	1275405	1279998	-	UPSTREAM	2427	LOC105391978	toll-like receptor 3	-	-	-	-	-	-	-
MSTRG.3647.3	NW_011952020.1	1391382	1394504	+	ncbi_105391416	1397980	1402932	-	DOWNSTREAM	3475	LOC105391416	uncharacterized LOC105391416	-	-	-	-	-	-	-
MSTRG.3696.1	NW_011952020.1	1845125	1867096	-	ncbi_105391536	1868622	1877760	-	DOWNSTREAM	1525	LOC105391536	uncharacterized LOC105391536	-	-	-	-	-	-	-
MSTRG.3715.3	NW_011952020.1	2076937	2077732	-	ncbi_105391580	2073034	2073642	-	UPSTREAM	3294	LOC105391580	trypsin	-	-	-	-	-	-	-
MSTRG.3715.3	NW_011952020.1	2076937	2077732	-	ncbi_105391617	2054521	2067391	-	UPSTREAM	9545	LOC105391617	trypsin	-	-	-	-	-	-	-
MSTRG.3732.1	NW_011952020.1	2235038	2236333	-	ncbi_105391691	2237261	2248943	-	DOWNSTREAM	927	LOC105391691	transportin-1	-	-	-	-	-	-	-
MSTRG.3816.1	NW_011952021.1	844637	873860	-	ncbi_105392279	842851	844533	-	UPSTREAM	103	LOC105392279	uncharacterized LOC105392279	-	-	-	-	-	-	-
MSTRG.3816.1	NW_011952021.1	844637	873860	-	ncbi_105392290	881825	882844	-	DOWNSTREAM	7964	LOC105392290	classical arabinogalactan protein 4-like	-	-	-	-	-	-	-
MSTRG.3829.2	NW_011952021.1	924563	925267	+	ncbi_105392333	912841	915072	+	DOWNSTREAM	9490	LOC105392333	protein-cysteine N-palmitoyltransferase Rasp	-	-	-	-	-	-	-
MSTRG.3829.2	NW_011952021.1	924563	925267	+	ncbi_105392727	925358	973767	+	UPSTREAM	90	LOC105392727	dynein heavy chain 8	-	-	-	-	-	GO:0017111//nucleoside-triphosphatase activity	-
MSTRG.3897.5	NW_011952021.1	1668003	1669217	+	ncbi_105392440	1659336	1661210	-	UPSTREAM	6792	LOC105392440	uncharacterized LOC105392440	-	-	-	-	-	-	-
MSTRG.3897.5	NW_011952021.1	1668003	1669217	+	ncbi_105392450	1645918	1667897	+	DOWNSTREAM	105	LOC105392450	hairy/enhancer-of-split related with YRPW motif protein	-	-	-	-	-	-	-
MSTRG.3897.5	NW_011952021.1	1668003	1669217	+	ncbi_105392796	1670114	1684700	-	DOWNSTREAM	896	LOC105392796	uncharacterized LOC105392796	Metabolism	Amino acid metabolism	ko00310//Lysine degradation	K09189	-	-	-
MSTRG.3916.2	NW_011952021.1	1797321	1798308	-	ncbi_105392540	1789042	1796359	-	UPSTREAM	961	LOC105392540	solute carrier family 46 member 3-like	-	-	-	-	-	-	-
MSTRG.3933.1	NW_011952021.1	2060238	2061007	-	ncbi_105392595	2061892	2073457	-	DOWNSTREAM	884	LOC105392595	putative fatty acyl-CoA reductase CG5065	Cellular Processes	Transport and catabolism	ko04146//Peroxisome	K13356	-	-	-
MSTRG.4029.2	NW_011952022.1	608917	610289	+	ncbi_105393009	601377	604700	-	UPSTREAM	4216	LOC105393009	oocyte zinc finger protein XlCOF6.1-like	-	-	-	-	-	-	-
MSTRG.4029.2	NW_011952022.1	608917	610289	+	ncbi_105393035	613254	619189	+	UPSTREAM	2964	LOC105393035	translation initiation factor eIF-2B subunit delta	Genetic Information Processing	Translation	ko03013//RNA transport	K03680	-	-	-
XR_961006.1	NW_011952022.1	642132	651928	+	ncbi_105393589	651983	672579	+	UPSTREAM	54	LOC105393589	solute carrier organic anion transporter family member 5A1-like	-	-	-	-	-	-	-
MSTRG.4047.1	NW_011952022.1	701181	702701	-	ncbi_105393618	703406	704470	-	DOWNSTREAM	704	LOC105393618	uncharacterized LOC105393618	-	-	-	-	-	-	-
MSTRG.4047.1	NW_011952022.1	701181	702701	-	ncbi_105393093	711201	712022	-	DOWNSTREAM	8499	LOC105393093	transcription elongation regulator 1-like	-	-	-	-	-	-	-
MSTRG.4048.1	NW_011952022.1	701265	702695	+	ncbi_105393618	703406	704470	-	DOWNSTREAM	710	LOC105393618	uncharacterized LOC105393618	-	-	-	-	-	-	-
MSTRG.4048.1	NW_011952022.1	701265	702695	+	ncbi_105393093	711201	712022	-	DOWNSTREAM	8505	LOC105393093	transcription elongation regulator 1-like	-	-	-	-	-	-	-
MSTRG.4055.1	NW_011952022.1	722103	722556	-	ncbi_105393635	714897	717461	-	UPSTREAM	4641	LOC105393635	hornerin-like	-	-	-	-	-	-	-
MSTRG.4055.1	NW_011952022.1	722103	722556	-	ncbi_105393652	728278	747496	+	UPSTREAM	5721	LOC105393652	ATP-binding cassette sub-family A member 2-like	Environmental Information Processing	Membrane transport	ko02010//ABC transporters	K05643	-	-	-
MSTRG.4113.1	NW_011952022.1	1219716	1221134	+	ncbi_105393720	1208597	1212848	-	UPSTREAM	6867	LOC105393720	ADAMTS-like protein 3	-	-	-	-	-	-	-
MSTRG.4129.1	NW_011952022.1	1332873	1336616	-	ncbi_105393761	1319233	1332113	+	DOWNSTREAM	759	LOC105393761	WD repeat-containing protein 24-like	-	-	-	-	-	-	-
MSTRG.4133.1	NW_011952022.1	1345067	1346862	+	ncbi_105393347	1333333	1340296	-	UPSTREAM	4770	LOC105393347	ras-related protein Ral-a	-	-	-	-	-	GO:0032550//purine ribonucleoside binding	GO:0035556//intracellular signal transduction
MSTRG.4197.2	NW_011952023.1	50396	51483	-	MSTRG.4195	42379	44327	-	UPSTREAM	6068	--	-	-	-	-	-	-	-	-
MSTRG.4197.2	NW_011952023.1	50396	51483	-	ncbi_105393897	58320	62940	+	UPSTREAM	6836	LOC105393897	uncharacterized LOC105393897	-	-	-	-	-	-	-
MSTRG.4197.2	NW_011952023.1	50396	51483	-	ncbi_105394546	51606	72226	-	DOWNSTREAM	122	LOC105394546	protein abrupt-like	-	-	-	-	-	-	-
MSTRG.4279.1	NW_011952023.1	1027819	1082453	-	ncbi_105394111	1083807	1102512	-	DOWNSTREAM	1353	LOC105394111	protein scarlet-like	-	-	-	-	-	-	-
MSTRG.4290.2	NW_011952023.1	1134113	1135965	-	ncbi_105394122	1106926	1133865	-	UPSTREAM	247	LOC105394122	protein white	-	-	-	-	GO:0031224//intrinsic component of membrane	GO:0017111//nucleoside-triphosphatase activity;GO:0032550//purine ribonucleoside binding	GO:0051234//establishment of localization
MSTRG.4319.1	NW_011952023.1	1332348	1333428	-	ncbi_105394302	1333566	1346332	-	DOWNSTREAM	137	LOC105394302	AP-1 complex subunit gamma-1	Cellular Processes	Transport and catabolism	ko04142//Lysosome	K12391	GO:0030119//AP-type membrane coat adaptor complex	GO:0022892//substrate-specific transporter activity	GO:0015031//protein transport
MSTRG.4338.1	NW_011952023.1	1557808	1564215	-	MSTRG.4340	1564794	1567427	+	UPSTREAM	578	--	PREDICTED: RNA-directed DNA polymerase from mobile element jockey-like isoform X1 [Amyelois transitella]	-	-	-	-	-	-	-
XR_961064.1	NW_011952023.1	1660241	1689618	-	ncbi_105394379	1697477	1796509	+	UPSTREAM	7858	LOC105394379	probable nuclear hormone receptor HR3	-	-	-	-	GO:0043231//intracellular membrane-bounded organelle	GO:0003677//DNA binding;GO:0004879//RNA polymerase II transcription factor activity, ligand-activated sequence-specific DNA binding;GO:0038023//signaling receptor activity;GO:0046914//transition metal ion binding	GO:0009755//hormone-mediated signaling pathway;GO:0009987//cellular process;GO:0010468//regulation of gene expression;GO:0034645//cellular macromolecule biosynthetic process
MSTRG.4404.1	NW_011952024.1	167891	169197	-	ncbi_105395375	169837	172344	-	DOWNSTREAM	639	LOC105395375	alpha-N-acetylglucosaminidase	Metabolism;Cellular Processes;Metabolism	Global and overview maps;Transport and catabolism;Glycan biosynthesis and metabolism	ko01100//Metabolic pathways;ko04142//Lysosome;ko00531//Glycosaminoglycan degradation	K01205;K01205;K01205	-	-	-
MSTRG.4534.1	NW_011952024.1	1118585	1119259	+	ncbi_105395500	1128624	1134134	-	DOWNSTREAM	9364	LOC105395500	neurofilament heavy polypeptide-like	-	-	-	-	-	-	-
MSTRG.4604.1	NW_011952024.1	1676865	1678426	+	ncbi_105395608	1646109	1676094	+	DOWNSTREAM	770	LOC105395608	uncharacterized LOC105395608	-	-	-	-	-	-	-
MSTRG.4621.2	NW_011952024.1	1760947	1761671	-	ncbi_105395248	1762784	1777834	-	DOWNSTREAM	1112	LOC105395248	lachesin-like	-	-	-	-	-	-	-
MSTRG.4778.1	NW_011952025.1	1244081	1266693	+	ncbi_105396015	1240398	1243872	-	UPSTREAM	208	LOC105396015	protein YIPF6-like	-	-	-	-	GO:0031224//intrinsic component of membrane	-	-
MSTRG.4778.1	NW_011952025.1	1244081	1266693	+	ncbi_105396036	1268754	1269977	+	UPSTREAM	2060	LOC105396036	protein dpy-30 homolog	-	-	-	-	-	-	-
MSTRG.4778.1	NW_011952025.1	1244081	1266693	+	ncbi_105396047	1270054	1278268	-	DOWNSTREAM	3360	LOC105396047	radial spoke head 1 homolog	-	-	-	-	-	-	-
MSTRG.4905.3	NW_011952026.1	180019	205670	+	ncbi_105397515	207361	217019	+	UPSTREAM	1690	LOC105397515	uncharacterized LOC105397515	-	-	-	-	-	-	-
MSTRG.4911.1	NW_011952026.1	221905	223832	+	ncbi_105396846	230661	232745	-	DOWNSTREAM	6828	LOC105396846	leucine-rich repeat transmembrane neuronal protein 2	-	-	-	-	-	-	-
MSTRG.4911.1	NW_011952026.1	221905	223832	+	ncbi_105397515	207361	217019	+	DOWNSTREAM	4885	LOC105397515	uncharacterized LOC105397515	-	-	-	-	-	-	-
MSTRG.5002.1	NW_011952026.1	823941	824770	+	ncbi_105397676	813277	819173	+	DOWNSTREAM	4767	LOC105397676	m7GpppX diphosphatase-like	Genetic Information Processing	Folding, sorting and degradation	ko03018//RNA degradation	K12584	-	-	-
MSTRG.5002.1	NW_011952026.1	823941	824770	+	ncbi_105397116	829895	897376	-	DOWNSTREAM	5124	LOC105397116	pleckstrin homology-like domain family B member 2	-	-	-	-	-	-	-
MSTRG.5012.1	NW_011952026.1	935509	950291	-	ncbi_105397189	958349	964730	-	DOWNSTREAM	8057	LOC105397189	delta(3	Cellular Processes	Transport and catabolism	ko04146//Peroxisome	K12663	-	-	-
MSTRG.5012.1	NW_011952026.1	935509	950291	-	ncbi_105397685	914078	935388	+	DOWNSTREAM	120	LOC105397685	hemicentin-2	-	-	-	-	-	-	-
MSTRG.5054.1	NW_011952026.1	1243138	1249869	-	ncbi_105397758	1213786	1236739	+	DOWNSTREAM	6398	LOC105397758	peroxisome biogenesis factor 1-like	Cellular Processes	Transport and catabolism	ko04146//Peroxisome	K13338	-	-	-
MSTRG.5111.1	NW_011952026.1	1626300	1627401	-	MSTRG.5108	1614289	1620607	-	UPSTREAM	5692	--	PREDICTED: uncharacterized protein LOC106129409 [Amyelois transitella]	-	-	-	-	-	-	-
MSTRG.5194.2	NW_011952027.1	434495	435075	-	ncbi_105397896	422847	425863	-	UPSTREAM	8631	LOC105397896	juvenile hormone esterase-like	-	-	-	-	-	-	-
MSTRG.5414.1	NW_011952028.1	606587	613261	+	ncbi_105398048	614180	655703	+	UPSTREAM	918	LOC105398048	probable phospholipid-transporting ATPase VD	-	-	-	-	-	-	-
MSTRG.5456.1	NW_011952028.1	1028865	1029827	+	ncbi_105397997	1011374	1019560	+	DOWNSTREAM	9304	LOC105397997	cytochrome P450 4g15	-	-	-	-	-	GO:0016491//oxidoreductase activity;GO:0046906//tetrapyrrole binding;GO:0046914//transition metal ion binding	GO:0044710//single-organism metabolic process
MSTRG.5575.1	NW_011952029.1	160792	162828	+	ncbi_105398065	163667	167254	-	DOWNSTREAM	838	LOC105398065	BUD13 homolog	-	-	-	-	-	-	-
MSTRG.5575.1	NW_011952029.1	160792	162828	+	ncbi_105398144	120970	155517	+	DOWNSTREAM	5274	LOC105398144	uncharacterized LOC105398144	-	-	-	-	-	-	-
MSTRG.5579.1	NW_011952029.1	171525	172619	-	ncbi_105398065	163667	167254	-	UPSTREAM	4270	LOC105398065	BUD13 homolog	-	-	-	-	-	-	-
MSTRG.5611.5	NW_011952029.1	653661	687402	+	ncbi_105398070	641284	653578	+	DOWNSTREAM	82	LOC105398070	beta-1	-	-	-	-	-	-	-
MSTRG.5611.5	NW_011952029.1	653661	687402	+	ncbi_105398152	689069	691193	+	UPSTREAM	1666	LOC105398152	uncharacterized LOC105398152	-	-	-	-	-	-	-
MSTRG.5615.2	NW_011952029.1	689080	694789	+	ncbi_105398071	699127	708284	+	UPSTREAM	4337	LOC105398071	beta-1	Metabolism;Metabolism;Metabolism;Metabolism;Metabolism;Metabolism	Global and overview maps;Carbohydrate metabolism;Glycan biosynthesis and metabolism;Glycan biosynthesis and metabolism;Glycan biosynthesis and metabolism;Glycan biosynthesis and metabolism	ko01100//Metabolic pathways;ko00052//Galactose metabolism;ko00510//N-Glycan biosynthesis;ko00514//Other types of O-glycan biosynthesis;ko00601//Glycosphingolipid biosynthesis - lacto and neolacto series;ko00533//Glycosaminoglycan biosynthesis - keratan sulfate	K07966;K07966;K07966;K07966;K07966;K07966	-	-	-
MSTRG.5644.2	NW_011952029.1	952750	957275	-	ncbi_105398160	943199	946818	-	UPSTREAM	5931	LOC105398160	probable serine/threonine-protein kinase DDB_G0282963	-	-	-	-	-	-	-
XR_961186.1	NW_011952029.1	1026721	1029566	-	ncbi_105398088	1023447	1024485	-	UPSTREAM	2235	LOC105398088	uncharacterized LOC105398088	-	-	-	-	-	-	-
XR_961186.1	NW_011952029.1	1026721	1029566	-	ncbi_105398092	1037525	1038167	-	DOWNSTREAM	7958	LOC105398092	ejaculatory bulb-specific protein 3-like	-	-	-	-	-	-	-
MSTRG.5788.1	NW_011952029.1	1623495	1625695	+	ncbi_105398180	1632089	1658520	-	DOWNSTREAM	6393	LOC105398180	uncharacterized LOC105398180	-	-	-	-	-	-	-
MSTRG.5794.1	NW_011952029.1	1676497	1678325	-	MSTRG.5792	1669696	1674139	-	UPSTREAM	2357	--	-	-	-	-	-	-	-	-
MSTRG.5853.3	NW_011952030.1	285876	291694	+	ncbi_105398198	295315	353706	-	DOWNSTREAM	3620	LOC105398198	transcription factor SOX-6	-	-	-	-	-	-	-
MSTRG.6020.1	NW_011952031.1	115350	139383	+	MSTRG.6023	142461	144368	+	UPSTREAM	3077	--	-	-	-	-	-	-	-	-
MSTRG.6022.1	NW_011952031.1	135658	136645	+	MSTRG.6023	142461	144368	+	UPSTREAM	5815	--	-	-	-	-	-	-	-	-
MSTRG.6058.1	NW_011952031.1	476035	477656	-	ncbi_105398267	461364	475497	-	UPSTREAM	537	LOC105398267	sorting and assembly machinery component 50 homolog A-like	-	-	-	-	-	-	-
MSTRG.6112.1	NW_011952031.1	925696	926596	+	ncbi_105398327	927789	944781	+	UPSTREAM	1192	LOC105398327	uncharacterized LOC105398327	-	-	-	-	-	-	-
MSTRG.6112.1	NW_011952031.1	925696	926596	+	ncbi_105398279	893441	922931	+	DOWNSTREAM	2764	LOC105398279	T-cell acute lymphocytic leukemia protein 1 homolog	-	-	-	-	-	-	-
MSTRG.6198.1	NW_011952031.1	1761525	1763141	+	ncbi_105398297	1763151	1764954	-	DOWNSTREAM	9	LOC105398297	sugar transporter ERD6-like 6	-	-	-	-	-	-	-
MSTRG.6267.1	NW_011952032.1	389057	393956	-	ncbi_105398356	402617	507575	-	DOWNSTREAM	8660	LOC105398356	octopamine receptor beta-2R-like	-	-	-	-	-	GO:0004871//signal transducer activity	GO:0007165//signal transduction;GO:0008152//metabolic process
XR_961204.1	NW_011952032.1	586626	587715	-	ncbi_105398359	592970	597211	+	UPSTREAM	5254	LOC105398359	facilitated trehalose transporter Tret1-like	-	-	-	-	-	-	-
MSTRG.6292.1	NW_011952032.1	597316	597905	+	ncbi_105398359	592970	597211	+	DOWNSTREAM	104	LOC105398359	facilitated trehalose transporter Tret1-like	-	-	-	-	-	-	-
MSTRG.6306.1	NW_011952032.1	782856	786969	-	ncbi_105398404	787399	807130	-	DOWNSTREAM	429	LOC105398404	ubiquitin thioesterase trabid-like	-	-	-	-	-	-	-
MSTRG.6323.1	NW_011952032.1	858848	870574	-	MSTRG.6317	849213	850585	-	UPSTREAM	8262	--	-	-	-	-	-	-	-	-
MSTRG.6323.1	NW_011952032.1	858848	870574	-	MSTRG.6327	873003	874260	-	DOWNSTREAM	2428	--	-	-	-	-	-	-	-	-
MSTRG.6324.1	NW_011952032.1	862893	864244	-	MSTRG.6327	873003	874260	-	DOWNSTREAM	8758	--	-	-	-	-	-	-	-	-
MSTRG.6323.3	NW_011952032.1	869177	870574	-	MSTRG.6327	873003	874260	-	DOWNSTREAM	2428	--	-	-	-	-	-	-	-	-
MSTRG.6430.3	NW_011952032.1	1706063	1706322	-	ncbi_105398398	1699342	1701418	-	UPSTREAM	4644	LOC105398398	uncharacterized LOC105398398	-	-	-	-	-	-	-
MSTRG.6464.1	NW_011952033.1	185039	186053	-	ncbi_105398508	170202	178448	+	DOWNSTREAM	6590	LOC105398508	uncharacterized LOC105398508	-	-	-	-	-	-	-
MSTRG.6487.4	NW_011952033.1	318717	321061	+	ncbi_105398422	292728	316620	+	DOWNSTREAM	2096	LOC105398422	forkhead box protein K1	-	-	-	-	-	-	-
MSTRG.6493.3	NW_011952033.1	348844	359617	-	ncbi_105398428	345820	347205	+	DOWNSTREAM	1638	LOC105398428	cuticle protein 16.5	-	-	-	-	-	-	-
MSTRG.6493.3	NW_011952033.1	348844	359617	-	ncbi_105398516	366270	367303	-	DOWNSTREAM	6652	LOC105398516	cuticle protein 16.5	-	-	-	-	-	-	-
MSTRG.6616.1	NW_011952033.1	979643	1186129	-	ncbi_105398529	969082	969840	-	UPSTREAM	9802	LOC105398529	uncharacterized LOC105398529	-	-	-	-	-	-	-
MSTRG.6648.3	NW_011952033.1	1218193	1219513	+	ncbi_105398483	1216541	1217511	+	DOWNSTREAM	681	LOC105398483	uncharacterized LOC105398483	-	-	-	-	-	-	-
MSTRG.6680.1	NW_011952033.1	1422518	1423120	+	ncbi_105398491	1432289	1435855	+	UPSTREAM	9168	LOC105398491	putative nuclease HARBI1	-	-	-	-	-	-	-
MSTRG.6680.1	NW_011952033.1	1422518	1423120	+	ncbi_105398489	1424214	1428617	-	DOWNSTREAM	1093	LOC105398489	uncharacterized LOC105398489	-	-	-	-	-	-	-
MSTRG.6802.1	NW_011952034.1	653733	657027	-	ncbi_105398609	661658	662849	-	DOWNSTREAM	4630	LOC105398609	hormone receptor 4-like	-	-	-	-	GO:0043231//intracellular membrane-bounded organelle	GO:0001071//nucleic acid binding transcription factor activity;GO:0003677//DNA binding;GO:0038023//signaling receptor activity;GO:0046914//transition metal ion binding	GO:0009755//hormone-mediated signaling pathway;GO:0010468//regulation of gene expression;GO:0034645//cellular macromolecule biosynthetic process
MSTRG.6809.1	NW_011952034.1	667932	687142	-	ncbi_105398609	661658	662849	-	UPSTREAM	5082	LOC105398609	hormone receptor 4-like	-	-	-	-	GO:0043231//intracellular membrane-bounded organelle	GO:0001071//nucleic acid binding transcription factor activity;GO:0003677//DNA binding;GO:0038023//signaling receptor activity;GO:0046914//transition metal ion binding	GO:0009755//hormone-mediated signaling pathway;GO:0010468//regulation of gene expression;GO:0034645//cellular macromolecule biosynthetic process
MSTRG.6870.2	NW_011952034.1	1183400	1199982	-	ncbi_105398618	1200816	1205114	+	UPSTREAM	833	LOC105398618	testis-expressed sequence 9 protein-like	-	-	-	-	-	-	-
MSTRG.6875.1	NW_011952034.1	1232178	1260433	+	ncbi_105398619	1211929	1227655	+	DOWNSTREAM	4522	LOC105398619	uncharacterized LOC105398619	-	-	-	-	-	-	-
MSTRG.6875.1	NW_011952034.1	1232178	1260433	+	ncbi_105398575	1227769	1231509	+	DOWNSTREAM	668	LOC105398575	uncharacterized LOC105398575	-	-	-	-	-	-	-
XR_961225.1	NW_011952034.1	1330961	1332701	+	ncbi_105398620	1286397	1330915	+	DOWNSTREAM	45	LOC105398620	paired amphipathic helix protein Sin3b-like	-	-	-	-	-	-	-
MSTRG.6906.3	NW_011952034.1	1526518	1527548	-	ncbi_105398587	1531536	1543113	-	DOWNSTREAM	3987	LOC105398587	UBX domain-containing protein 4-like	-	-	-	-	-	-	-
MSTRG.6959.1	NW_011952035.1	218868	220864	-	MSTRG.6961	230430	232660	+	UPSTREAM	9565	Smg7	PREDICTED: protein SMG7-like [Plutella xylostella]	Genetic Information Processing	Translation	ko03015//mRNA surveillance pathway	K14409	-	-	-
MSTRG.6966.1	NW_011952035.1	259500	261736	+	ncbi_105398632	254398	258893	+	DOWNSTREAM	606	LOC105398632	uncharacterized protein C6orf136 homolog	-	-	-	-	-	-	-
MSTRG.6966.1	NW_011952035.1	259500	261736	+	ncbi_105398631	242906	254018	-	UPSTREAM	5481	LOC105398631	nucleolar complex protein 4 homolog B	-	-	-	-	-	-	-
MSTRG.6999.2	NW_011952035.1	402297	404289	-	ncbi_105398639	393696	400306	+	DOWNSTREAM	1990	LOC105398639	folylpolyglutamate synthase	Metabolism;Metabolism	Global and overview maps;Metabolism of cofactors and vitamins	ko01100//Metabolic pathways;ko00790//Folate biosynthesis	K01930;K01930	-	-	-
MSTRG.6999.2	NW_011952035.1	402297	404289	-	ncbi_105398641	400437	401896	+	DOWNSTREAM	400	LOC105398641	speckle-type POZ protein-like	-	-	-	-	-	-	-
MSTRG.6999.2	NW_011952035.1	402297	404289	-	ncbi_105398677	408100	409695	+	UPSTREAM	3810	LOC105398677	ARM REPEAT PROTEIN INTERACTING WITH ABF2-like	-	-	-	-	-	-	-
MSTRG.6999.2	NW_011952035.1	402297	404289	-	ncbi_105398676	387792	393382	-	UPSTREAM	8914	LOC105398676	uncharacterized LOC105398676	Metabolism;Metabolism;Metabolism;Metabolism	Global and overview maps;Global and overview maps;Global and overview maps;Nucleotide metabolism	ko01100//Metabolic pathways;ko01110//Biosynthesis of secondary metabolites;ko01130//Biosynthesis of antibiotics;ko00230//Purine metabolism	K00939;K00939;K00939;K00939	-	-	-
MSTRG.7039.1	NW_011952035.1	720830	727141	+	ncbi_105398650	736785	771136	+	UPSTREAM	9643	LOC105398650	integrin beta-like protein 1	-	-	-	-	-	-	-
MSTRG.7078.1	NW_011952035.1	1159395	1159825	-	MSTRG.7079	1159897	1165978	-	DOWNSTREAM	71	--	PREDICTED: limulus clotting factor C-like isoform X3 [Papilio polytes]	-	-	-	-	-	-	-
MSTRG.7115.1	NW_011952035.1	1421087	1421830	-	MSTRG.7112	1418691	1419299	+	DOWNSTREAM	1787	--	-	-	-	-	-	-	-	-
MSTRG.7147.1	NW_011952036.1	22701	24916	-	ncbi_105398707	30723	35417	+	UPSTREAM	5806	LOC105398707	cysteine string protein	Genetic Information Processing	Folding, sorting and degradation	ko04141//Protein processing in endoplasmic reticulum	K09525	-	-	-
MSTRG.7219.1	NW_011952036.1	639413	648480	+	ncbi_105398780	648879	667578	-	DOWNSTREAM	398	LOC105398780	putative U5 small nuclear ribonucleoprotein 200 kDa helicase	Genetic Information Processing	Transcription	ko03040//Spliceosome	K12854	-	GO:0016787//hydrolase activity;GO:0097159//organic cyclic compound binding;GO:1901363//heterocyclic compound binding	-
MSTRG.7219.2	NW_011952036.1	639514	642928	+	ncbi_105398780	648879	667578	-	DOWNSTREAM	5950	LOC105398780	putative U5 small nuclear ribonucleoprotein 200 kDa helicase	Genetic Information Processing	Transcription	ko03040//Spliceosome	K12854	-	GO:0016787//hydrolase activity;GO:0097159//organic cyclic compound binding;GO:1901363//heterocyclic compound binding	-
MSTRG.7284.1	NW_011952036.1	1059301	1060396	+	ncbi_105398743	1061296	1068542	-	DOWNSTREAM	899	LOC105398743	transmembrane protease serine 3-like	-	-	-	-	-	-	-
XR_961232.1	NW_011952036.1	1529783	1530757	+	ncbi_105398795	1526580	1527210	+	DOWNSTREAM	2572	LOC105398795	outer dense fiber protein 3-like protein 2	-	-	-	-	-	-	-
XR_961232.1	NW_011952036.1	1529783	1530757	+	ncbi_105398752	1531115	1536460	+	UPSTREAM	357	LOC105398752	outer dense fiber protein 3-like protein 2	-	-	-	-	-	-	-
XR_961232.1	NW_011952036.1	1529783	1530757	+	ncbi_105398753	1536874	1538255	-	DOWNSTREAM	6116	LOC105398753	39S ribosomal protein L54	-	-	-	-	-	-	-
XR_961232.1	NW_011952036.1	1529783	1530757	+	ncbi_105398796	1538660	1547042	+	UPSTREAM	7902	LOC105398796	classical arabinogalactan protein 4-like	-	-	-	-	-	-	-
MSTRG.7346.1	NW_011952036.1	1583994	1586050	-	ncbi_105398754	1580883	1583229	+	DOWNSTREAM	764	LOC105398754	uncharacterized LOC105398754	-	-	-	-	-	-	-
MSTRG.7346.1	NW_011952036.1	1583994	1586050	-	ncbi_105398755	1594278	1596173	+	UPSTREAM	8227	LOC105398755	nicotinamide riboside kinase 2-like	Metabolism;Metabolism	Global and overview maps;Metabolism of cofactors and vitamins	ko01100//Metabolic pathways;ko00760//Nicotinate and nicotinamide metabolism	K10524;K10524	-	-	-
MSTRG.7360.2	NW_011952036.1	1646501	1647146	-	ncbi_105398757	1633947	1638005	+	DOWNSTREAM	8495	LOC105398757	uncharacterized LOC105398757	-	-	-	-	-	-	-
MSTRG.7431.2	NW_011952037.1	432885	433569	-	ncbi_105398817	423280	429305	+	DOWNSTREAM	3579	LOC105398817	TGF-beta-activated kinase 1 and MAP3K7-binding protein 1-like	-	-	-	-	-	-	-
MSTRG.7453.1	NW_011952037.1	623117	623628	+	ncbi_105398823	616828	620594	+	DOWNSTREAM	2522	LOC105398823	beta-1	Metabolism;Metabolism;Metabolism	Global and overview maps;Glycan biosynthesis and metabolism;Glycan biosynthesis and metabolism	ko01100//Metabolic pathways;ko00534//Glycosaminoglycan biosynthesis - heparan sulfate / heparin;ko00532//Glycosaminoglycan biosynthesis - chondroitin sulfate / dermatan sulfate	K00733;K00733;K00733	-	GO:0016740//transferase activity	-
MSTRG.7561.1	NW_011952037.1	1480319	1481451	+	MSTRG.7558	1473773	1478348	+	DOWNSTREAM	1970	GIP	Retrovirus-related Pol polyprotein from transposon TNT 1-94 [Papilio machaon]	-	-	-	-	-	-	-
MSTRG.7637.1	NW_011952038.1	288518	289729	-	ncbi_105380021	289897	293420	-	DOWNSTREAM	167	LOC105380021	torso-like protein	Environmental Information Processing	Signal transduction	ko04013//MAPK signaling pathway - fly	K12377	-	-	-
MSTRG.7637.1	NW_011952038.1	288518	289729	-	MSTRG.7632	277624	279413	-	UPSTREAM	9104	--	hypothetical protein RR46_09399 [Papilio xuthus]	-	-	-	-	-	-	-
MSTRG.7637.1	NW_011952038.1	288518	289729	-	ncbi_105380022	296670	327547	-	DOWNSTREAM	6940	LOC105380022	torso-like protein	Environmental Information Processing	Signal transduction	ko04013//MAPK signaling pathway - fly	K12377	-	-	-
MSTRG.7646.1	NW_011952038.1	374988	381533	+	ncbi_105380084	391341	398554	+	UPSTREAM	9807	LOC105380084	tyrosine-protein phosphatase 69D-like	-	-	-	-	-	-	-
MSTRG.7801.1	NW_011952038.1	1521333	1556077	-	ncbi_105380069	1511224	1513682	+	DOWNSTREAM	7650	LOC105380069	UDP-glucuronosyltransferase 2B19-like	Metabolism;Metabolism;Metabolism;Metabolism;Metabolism;Metabolism;Metabolism;Metabolism;Metabolism;Metabolism	Global and overview maps;Global and overview maps;Carbohydrate metabolism;Carbohydrate metabolism;Xenobiotics biodegradation and metabolism;Xenobiotics biodegradation and metabolism;Metabolism of cofactors and vitamins;Xenobiotics biodegradation and metabolism;Carbohydrate metabolism;Metabolism of cofactors and vitamins	ko01100//Metabolic pathways;ko01110//Biosynthesis of secondary metabolites;ko00500//Starch and sucrose metabolism;ko00040//Pentose and glucuronate interconversions;ko00983//Drug metabolism - other enzymes;ko00980//Metabolism of xenobiotics by cytochrome P450;ko00860//Porphyrin and chlorophyll metabolism;ko00982//Drug metabolism - cytochrome P450;ko00053//Ascorbate and aldarate metabolism;ko00830/…	K00699;K00699;K00699;K00699;K00699;K00699;K00699;K00699;K00699;K00699	-	GO:0016757//transferase activity, transferring glycosyl groups	-
MSTRG.7801.1	NW_011952038.1	1521333	1556077	-	ncbi_105380070	1513861	1515584	+	DOWNSTREAM	5748	LOC105380070	uncharacterized LOC105380070	-	-	-	-	-	-	-
MSTRG.7828.1	NW_011952039.1	175915	177387	+	MSTRG.7830	182789	185300	+	UPSTREAM	5401	--	-	-	-	-	-	-	-	-
MSTRG.7828.1	NW_011952039.1	175915	177387	+	ncbi_105380144	137633	172473	+	DOWNSTREAM	3441	LOC105380144	uncharacterized LOC105380144	-	-	-	-	-	-	-
MSTRG.7828.1	NW_011952039.1	175915	177387	+	ncbi_105380145	185344	212680	-	DOWNSTREAM	7956	LOC105380145	vascular endothelial growth factor receptor 1-like	Cellular Processes	Transport and catabolism	ko04144//Endocytosis	K05096	-	-	-
MSTRG.7940.2	NW_011952039.1	1163042	1165041	+	ncbi_105380133	1151291	1156241	-	UPSTREAM	6800	LOC105380133	uncharacterized LOC105380133	-	-	-	-	-	-	-
MSTRG.8010.1	NW_011952040.1	65213	71584	-	MSTRG.8013	72186	74625	+	UPSTREAM	601	GNBP3	PREDICTED: beta-1,3-glucan-binding protein-like [Plutella xylostella]	Organismal Systems	Immune system	ko04624//Toll and Imd signaling pathway	K20692	-	-	-
MSTRG.8024.1	NW_011952040.1	169249	170023	+	ncbi_105380254	177511	244386	+	UPSTREAM	7487	LOC105380254	eye-specific diacylglycerol kinase	Metabolism;Metabolism;Environmental Information Processing;Metabolism;Metabolism	Global and overview maps;Global and overview maps;Signal transduction;Lipid metabolism;Lipid metabolism	ko01100//Metabolic pathways;ko01110//Biosynthesis of secondary metabolites;ko04070//Phosphatidylinositol signaling system;ko00564//Glycerophospholipid metabolism;ko00561//Glycerolipid metabolism	K00901;K00901;K00901;K00901;K00901	-	-	-
MSTRG.8090.1	NW_011952040.1	613258	615065	-	ncbi_105380206	619806	686683	-	DOWNSTREAM	4740	LOC105380206	potassium/sodium hyperpolarization-activated cyclic nucleotide-gated channel 2	-	-	-	-	-	-	-
MSTRG.8116.1	NW_011952040.1	831453	831904	+	ncbi_105380210	807119	823380	+	DOWNSTREAM	8072	LOC105380210	dynein intermediate chain 2	-	-	-	-	-	-	-
MSTRG.8150.1	NW_011952040.1	1089334	1092544	-	ncbi_105380219	1086812	1089052	-	UPSTREAM	281	LOC105380219	uncharacterized LOC105380219	-	-	-	-	-	-	-
MSTRG.8150.1	NW_011952040.1	1089334	1092544	-	ncbi_105380222	1099579	1107193	+	UPSTREAM	7034	LOC105380222	uncharacterized LOC105380222	-	-	-	-	-	-	-
MSTRG.8193.2	NW_011952040.1	1324141	1325123	-	ncbi_105380237	1317069	1319492	-	UPSTREAM	4648	LOC105380237	troponin C	-	-	-	-	-	-	-
MSTRG.8212.1	NW_011952040.1	1478980	1481164	+	ncbi_105380243	1462945	1470226	+	DOWNSTREAM	8753	LOC105380243	organic cation transporter protein-like	-	-	-	-	-	-	-
MSTRG.8234.1	NW_011952040.1	1638022	1640329	-	ncbi_105380294	1640628	1646768	-	DOWNSTREAM	298	LOC105380294	proteoglycan 4-like	-	-	-	-	-	-	-
MSTRG.8324.1	NW_011952041.1	788665	789930	+	ncbi_105380323	796790	807883	-	DOWNSTREAM	6859	LOC105380323	plexin domain-containing protein 2-like	-	-	-	-	-	-	-
MSTRG.8365.1	NW_011952041.1	1104071	1105811	-	ncbi_105380329	1092106	1095480	-	UPSTREAM	8590	LOC105380329	alpha-amylase 4N-like	Metabolism	Amino acid metabolism	ko00260//Glycine, serine and threonine metabolism	K00639	-	GO:0016160//amylase activity;GO:0043167//ion binding	GO:0044238//primary metabolic process
MSTRG.8365.1	NW_011952041.1	1104071	1105811	-	ncbi_105380331	1096275	1103582	-	UPSTREAM	488	LOC105380331	alpha-amylase 4N-like	Metabolism	Amino acid metabolism	ko00260//Glycine, serine and threonine metabolism	K00639	-	-	-
MSTRG.8388.2	NW_011952041.1	1358589	1399669	-	ncbi_105380334	1302995	1351081	-	UPSTREAM	7507	LOC105380334	G-protein coupled receptor Mth2-like	-	-	-	-	-	-	-
MSTRG.8399.5	NW_011952041.1	1459099	1459656	+	ncbi_105380367	1464843	1476916	-	DOWNSTREAM	5186	LOC105380367	uncharacterized LOC105380367	-	-	-	-	-	GO:0046914//transition metal ion binding;GO:0070011//peptidase activity, acting on L-amino acid peptides	GO:0019538//protein metabolic process
MSTRG.8399.6	NW_011952041.1	1459101	1460316	+	ncbi_105380367	1464843	1476916	-	DOWNSTREAM	4526	LOC105380367	uncharacterized LOC105380367	-	-	-	-	-	GO:0046914//transition metal ion binding;GO:0070011//peptidase activity, acting on L-amino acid peptides	GO:0019538//protein metabolic process
MSTRG.8474.1	NW_011952042.1	328495	329320	-	ncbi_105380375	333550	341107	+	UPSTREAM	4229	LOC105380375	cytoplasmic aconitate hydratase-like	Metabolism;Metabolism;Metabolism;Metabolism;Metabolism;Metabolism;Metabolism;Metabolism;Metabolism	Global and overview maps;Global and overview maps;Global and overview maps;Global and overview maps;Global and overview maps;Global and overview maps;Carbohydrate metabolism;Carbohydrate metabolism;Global and overview maps	ko01100//Metabolic pathways;ko01110//Biosynthesis of secondary metabolites;ko01130//Biosynthesis of antibiotics;ko01120//Microbial metabolism in diverse environments;ko01200//Carbon metabolism;ko01230//Biosynthesis of amino acids;ko00020//Citrate cycle (TCA cycle);ko00630//Glyoxylate and dicarboxylate metabolism;ko01210//2-Oxocarboxylic acid metabolism	K01681;K01681;K01681;K01681;K01681;K01681;K01681;K01681;K01681	-	-	-
MSTRG.8554.2	NW_011952042.1	962402	963403	-	ncbi_105380451	965090	967025	-	DOWNSTREAM	1686	LOC105380451	phosphatidylinositide phosphatase SAC2-like	-	-	-	-	-	-	-
MSTRG.8554.2	NW_011952042.1	962402	963403	-	ncbi_105380450	890872	957218	-	UPSTREAM	5183	LOC105380450	ubiquitin carboxyl-terminal hydrolase 34-like	-	-	-	-	-	-	-
MSTRG.8635.1	NW_011952043.1	53242	54061	+	ncbi_105380464	60456	61565	+	UPSTREAM	6394	LOC105380464	uncharacterized LOC105380464	-	-	-	-	-	-	-
MSTRG.8640.1	NW_011952043.1	61877	64752	+	ncbi_105380464	60456	61565	+	DOWNSTREAM	311	LOC105380464	uncharacterized LOC105380464	-	-	-	-	-	-	-
MSTRG.8640.1	NW_011952043.1	61877	64752	+	ncbi_105380518	65117	100552	-	DOWNSTREAM	364	LOC105380518	rho GTPase-activating protein 12-like	-	-	-	-	-	-	-
MSTRG.8718.1	NW_011952043.1	487222	489390	-	ncbi_105380531	499136	504766	-	DOWNSTREAM	9745	LOC105380531	late secretory pathway protein AVL9 homolog	-	-	-	-	-	-	-
MSTRG.8774.1	NW_011952043.1	914321	915665	+	ncbi_105380493	911241	913420	+	DOWNSTREAM	900	LOC105380493	adhesive plaque matrix protein-like	-	-	-	-	-	-	-
MSTRG.8775.2	NW_011952043.1	922508	924995	+	ncbi_105380493	911241	913420	+	DOWNSTREAM	9087	LOC105380493	adhesive plaque matrix protein-like	-	-	-	-	-	-	-
XR_960435.1	NW_011952043.1	1371908	1372779	-	ncbi_105380503	1370272	1371706	+	DOWNSTREAM	201	LOC105380503	NADH dehydrogenase [ubiquinone] iron-sulfur protein 8	Metabolism;Metabolism	Global and overview maps;Energy metabolism	ko01100//Metabolic pathways;ko00190//Oxidative phosphorylation	K03941;K03941	-	GO:0016491//oxidoreductase activity;GO:0051536//iron-sulfur cluster binding	GO:0044710//single-organism metabolic process
MSTRG.8990.1	NW_011952044.1	1332775	1339858	-	ncbi_105380617	1347710	1355177	-	DOWNSTREAM	7851	LOC105380617	uncharacterized LOC105380617	-	-	-	-	-	-	-
MSTRG.8990.1	NW_011952044.1	1332775	1339858	-	ncbi_105380615	1284865	1323944	+	DOWNSTREAM	8830	LOC105380615	uncharacterized LOC105380615	-	-	-	-	-	-	-
MSTRG.9124.1	NW_011952045.1	900137	900789	-	ncbi_105380685	883175	891446	-	UPSTREAM	8690	LOC105380685	tryptase-like	-	-	-	-	-	-	-
MSTRG.9176.1	NW_011952045.1	1226541	1229378	-	ncbi_105380643	1219719	1220124	+	DOWNSTREAM	6416	LOC105380643	mitochondrial fission 1 protein-like	-	-	-	-	-	-	-
XR_960445.1	NW_011952045.1	1542371	1544327	-	ncbi_105380657	1531236	1540651	+	DOWNSTREAM	1719	LOC105380657	alkaline phosphatase	Metabolism;Metabolism	Global and overview maps;Metabolism of cofactors and vitamins	ko01100//Metabolic pathways;ko00790//Folate biosynthesis	K01077;K01077	-	-	-
XR_960450.1	NW_011952047.1	2689	45672	-	ncbi_105380812	226	2680	-	UPSTREAM	8	LOC105380812	four-domain proteases inhibitor-like	-	-	-	-	-	-	-
XR_960450.1	NW_011952047.1	2689	45672	-	ncbi_105380813	48854	55541	+	UPSTREAM	3181	LOC105380813	monosaccharide-sensing protein 3-like	-	-	-	-	-	-	-
MSTRG.9532.1	NW_011952047.1	1502132	1502815	-	ncbi_105380811	1509884	1522844	+	UPSTREAM	7068	LOC105380811	vacuolar protein sorting-associated protein 35	Cellular Processes	Transport and catabolism	ko04144//Endocytosis	K18468	GO:0012505//endomembrane system	-	GO:0008104//protein localization;GO:0016192//vesicle-mediated transport
MSTRG.9617.1	NW_011952048.1	832022	901180	+	ncbi_105380853	901447	903561	+	UPSTREAM	266	LOC105380853	chymotrypsin-1-like	-	-	-	-	-	-	-
MSTRG.9622.1	NW_011952048.1	912710	921139	+	ncbi_105380853	901447	903561	+	DOWNSTREAM	9148	LOC105380853	chymotrypsin-1-like	-	-	-	-	-	-	-
MSTRG.9622.1	NW_011952048.1	912710	921139	+	ncbi_105380854	924083	926459	+	UPSTREAM	2943	LOC105380854	chymotrypsin-1-like	-	-	-	-	-	-	-
MSTRG.9622.1	NW_011952048.1	912710	921139	+	ncbi_105380856	927094	928886	-	DOWNSTREAM	5954	LOC105380856	chymotrypsin-1-like	-	-	-	-	-	-	-
MSTRG.9622.1	NW_011952048.1	912710	921139	+	ncbi_105380858	929315	931536	-	DOWNSTREAM	8175	LOC105380858	uncharacterized LOC105380858	-	-	-	-	-	-	-
MSTRG.9671.1	NW_011952048.1	1263097	1263920	+	ncbi_105380868	1257004	1258796	-	UPSTREAM	4300	LOC105380868	trypsin CFT-1-like	-	-	-	-	-	-	-
MSTRG.9671.1	NW_011952048.1	1263097	1263920	+	ncbi_105380870	1265423	1267297	-	DOWNSTREAM	1502	LOC105380870	trypsin	-	-	-	-	-	-	-
MSTRG.9671.1	NW_011952048.1	1263097	1263920	+	ncbi_105380872	1268447	1270015	-	DOWNSTREAM	4526	LOC105380872	trypsin	-	-	-	-	-	-	-
MSTRG.9671.1	NW_011952048.1	1263097	1263920	+	MSTRG.9675	1270657	1273250	-	DOWNSTREAM	6736	--	reverse transcriptase [Ostrinia nubilalis]	-	-	-	-	-	-	-
MSTRG.9671.1	NW_011952048.1	1263097	1263920	+	ncbi_105380905	1252869	1262841	-	UPSTREAM	255	LOC105380905	transmembrane protease serine 9-like	-	-	-	-	-	-	-
MSTRG.9686.1	NW_011952048.1	1358496	1365972	+	ncbi_105380910	1333089	1350288	-	UPSTREAM	8207	LOC105380910	uncharacterized LOC105380910	-	-	-	-	-	-	-
MSTRG.9691.1	NW_011952048.1	1375584	1376664	+	ncbi_105380911	1383462	1388908	+	UPSTREAM	6797	LOC105380911	uncharacterized LOC105380911	-	-	-	-	-	-	-
MSTRG.9695.1	NW_011952048.1	1381276	1382779	+	ncbi_105380911	1383462	1388908	+	UPSTREAM	682	LOC105380911	uncharacterized LOC105380911	-	-	-	-	-	-	-
MSTRG.9695.1	NW_011952048.1	1381276	1382779	+	ncbi_105380912	1392085	1414208	-	DOWNSTREAM	9305	LOC105380912	gastrula zinc finger protein XlCGF26.1-like	-	-	-	-	-	-	-
MSTRG.9735.1	NW_011952049.1	84956	86250	-	ncbi_105380967	92417	103431	-	DOWNSTREAM	6166	LOC105380967	activin receptor type-1	Environmental Information Processing	Signal transduction	ko04350//TGF-beta signaling pathway	K04675	-	GO:0004674//protein serine/threonine kinase activity;GO:0004871//signal transducer activity;GO:0004872//receptor activity	GO:0006796//phosphate-containing compound metabolic process;GO:0007165//signal transduction
MSTRG.9835.1	NW_011952049.1	1026398	1027492	+	ncbi_105380945	1027918	1030112	+	UPSTREAM	425	LOC105380945	uncharacterized LOC105380945	-	-	-	-	-	-	-
MSTRG.9835.1	NW_011952049.1	1026398	1027492	+	ncbi_105380946	1030216	1050359	-	DOWNSTREAM	2723	LOC105380946	protein DEK-like	-	-	-	-	-	-	-
MSTRG.9844.1	NW_011952049.1	1083028	1085117	+	ncbi_105380978	1072388	1081268	-	UPSTREAM	1759	LOC105380978	transient receptor potential cation channel subfamily V member 6-like	-	-	-	-	GO:0016020//membrane	-	GO:0006811//ion transport;GO:0044763//single-organism cellular process
MSTRG.9844.1	NW_011952049.1	1083028	1085117	+	ncbi_105380979	1092794	1112925	+	UPSTREAM	7676	LOC105380979	uncharacterized LOC105380979	-	-	-	-	-	GO:0004518//nuclease activity;GO:0043169//cation binding	GO:0090304//nucleic acid metabolic process
MSTRG.9861.1	NW_011952049.1	1243459	1244460	+	ncbi_105380953	1178148	1242953	+	DOWNSTREAM	505	LOC105380953	calbindin-32	-	-	-	-	-	-	-
MSTRG.9862.1	NW_011952049.1	1245019	1246385	+	ncbi_105380955	1255349	1258434	-	DOWNSTREAM	8963	LOC105380955	histone deacetylase HDT1-like	-	-	-	-	-	-	-
MSTRG.9862.1	NW_011952049.1	1245019	1246385	+	ncbi_105380953	1178148	1242953	+	DOWNSTREAM	2065	LOC105380953	calbindin-32	-	-	-	-	-	-	-
MSTRG.9973.1	NW_011952050.1	250801	276779	+	ncbi_105381048	282644	286519	-	DOWNSTREAM	5864	LOC105381048	uncharacterized LOC105381048	-	-	-	-	-	-	-
MSTRG.10010.1	NW_011952050.1	439832	440896	+	ncbi_105381054	429264	432214	-	UPSTREAM	7617	LOC105381054	muscle M-line assembly protein unc-89-like	-	-	-	-	-	-	-
MSTRG.10010.1	NW_011952050.1	439832	440896	+	ncbi_105381012	433498	435742	+	DOWNSTREAM	4089	LOC105381012	uncharacterized LOC105381012	-	-	-	-	-	-	-
MSTRG.10058.2	NW_011952050.1	841396	843945	+	ncbi_105381017	815630	840467	+	DOWNSTREAM	928	LOC105381017	calmodulin-binding transcription activator 2-like	-	-	-	-	-	-	-
XR_960471.1	NW_011952050.1	1296912	1298002	-	ncbi_105381034	1300705	1301679	-	DOWNSTREAM	2702	LOC105381034	uncharacterized LOC105381034	-	-	-	-	-	-	-
MSTRG.10196.1	NW_011952051.1	355384	377302	-	ncbi_105381076	309024	352723	+	DOWNSTREAM	2660	LOC105381076	Ig-like and fibronectin type-III domain-containing protein T04A11.3	-	-	-	-	-	-	-
MSTRG.10222.1	NW_011952051.1	545423	550954	+	ncbi_105381136	554974	562135	+	UPSTREAM	4019	LOC105381136	S-adenosylmethionine decarboxylase proenzyme-like	Metabolism;Metabolism;Metabolism	Global and overview maps;Amino acid metabolism;Amino acid metabolism	ko01100//Metabolic pathways;ko00270//Cysteine and methionine metabolism;ko00330//Arginine and proline metabolism	K01611;K01611;K01611	-	-	-
XR_960476.1	NW_011952051.1	841737	844824	-	ncbi_105381090	825863	841167	+	DOWNSTREAM	569	LOC105381090	fatty-acid amide hydrolase 2-like	-	-	-	-	-	-	-
MSTRG.10301.1	NW_011952051.1	1032268	1037856	+	MSTRG.10300	1025427	1031190	+	DOWNSTREAM	1077	--	-	-	-	-	-	-	-	-
MSTRG.10301.1	NW_011952051.1	1032268	1037856	+	ncbi_105381096	1040487	1047202	+	UPSTREAM	2630	LOC105381096	pumilio homolog 2-like	-	-	-	-	-	-	-
MSTRG.10339.1	NW_011952051.1	1219779	1274155	+	ncbi_105381112	1200505	1212644	+	DOWNSTREAM	7134	LOC105381112	MFS-type transporter SLC18B1-like	-	-	-	-	-	-	-
MSTRG.10357.3	NW_011952051.1	1446853	1448364	+	ncbi_105381119	1458062	1467100	+	UPSTREAM	9697	LOC105381119	trichoplein keratin filament-binding protein	-	-	-	-	-	-	-
MSTRG.10359.1	NW_011952051.1	1469941	1478120	+	ncbi_105381119	1458062	1467100	+	DOWNSTREAM	2840	LOC105381119	trichoplein keratin filament-binding protein	-	-	-	-	-	-	-
MSTRG.10477.2	NW_011952052.1	1351067	1352335	-	ncbi_105381183	1322094	1350836	+	DOWNSTREAM	230	LOC105381183	meteorin-like protein	-	-	-	-	-	-	-
MSTRG.10660.1	NW_011952053.1	776744	778046	-	ncbi_105381273	735047	775267	+	DOWNSTREAM	1476	LOC105381273	protein stum-like	-	-	-	-	-	-	-
MSTRG.10772.2	NW_011952054.1	218016	221265	+	ncbi_105381344	228863	293586	+	UPSTREAM	7597	LOC105381344	sensory neuron membrane protein 2-like	-	-	-	-	-	-	-
MSTRG.10773.2	NW_011952054.1	221590	224725	+	ncbi_105381344	228863	293586	+	UPSTREAM	4137	LOC105381344	sensory neuron membrane protein 2-like	-	-	-	-	-	-	-
MSTRG.10783.2	NW_011952054.1	352922	356427	-	ncbi_105381293	365763	373497	-	DOWNSTREAM	9335	LOC105381293	L-galactose dehydrogenase-like	-	-	-	-	-	-	-
XR_960484.1	NW_011952054.1	443621	444706	+	ncbi_105381347	375346	443595	+	DOWNSTREAM	25	LOC105381347	alpha-mannosidase 2-like	Metabolism	Glycan biosynthesis and metabolism	ko00511//Other glycan degradation	K01191	-	-	-
MSTRG.10790.4	NW_011952054.1	445112	447398	-	ncbi_105381347	375346	443595	+	DOWNSTREAM	1516	LOC105381347	alpha-mannosidase 2-like	Metabolism	Glycan biosynthesis and metabolism	ko00511//Other glycan degradation	K01191	-	-	-
MSTRG.10790.5	NW_011952054.1	445185	447398	-	ncbi_105381347	375346	443595	+	DOWNSTREAM	1589	LOC105381347	alpha-mannosidase 2-like	Metabolism	Glycan biosynthesis and metabolism	ko00511//Other glycan degradation	K01191	-	-	-
MSTRG.10802.1	NW_011952054.1	531824	534312	-	ncbi_105381350	503060	531042	+	DOWNSTREAM	781	LOC105381350	carnitine O-palmitoyltransferase 1	Metabolism;Metabolism;Environmental Information Processing;Organismal Systems;Organismal Systems;Organismal Systems	Global and overview maps;Lipid metabolism;Signal transduction;Endocrine system;Endocrine system;Endocrine system	ko01212//Fatty acid metabolism;ko00071//Fatty acid degradation;ko04152//AMPK signaling pathway;ko04922//Glucagon signaling pathway;ko03320//PPAR signaling pathway;ko04920//Adipocytokine signaling pathway	K19524;K19524;K19524;K19524;K19524;K19524	-	-	-
MSTRG.10818.1	NW_011952054.1	697512	740467	-	ncbi_105381301	748476	754160	+	UPSTREAM	8008	LOC105381301	dihydrofolate reductase-like	Metabolism;Metabolism;Metabolism	Global and overview maps;Metabolism of cofactors and vitamins;Metabolism of cofactors and vitamins	ko01100//Metabolic pathways;ko00670//One carbon pool by folate;ko00790//Folate biosynthesis	K00287;K00287;K00287	-	-	-
XR_960485.1	NW_011952054.1	799419	801128	-	ncbi_105381307	810161	814416	+	UPSTREAM	9032	LOC105381307	cytochrome c oxidase subunit 7C	Metabolism;Metabolism	Global and overview maps;Energy metabolism	ko01100//Metabolic pathways;ko00190//Oxidative phosphorylation	K02272;K02272	-	-	-
MSTRG.10835.1	NW_011952054.1	801839	814416	+	ncbi_105381309	814500	816307	+	UPSTREAM	83	LOC105381309	cytochrome c oxidase subunit 7C	Metabolism;Metabolism	Global and overview maps;Energy metabolism	ko01100//Metabolic pathways;ko00190//Oxidative phosphorylation	K02272;K02272	-	-	-
MSTRG.10835.1	NW_011952054.1	801839	814416	+	ncbi_105381310	817260	824457	+	UPSTREAM	2843	LOC105381310	T-complex protein 1 subunit epsilon	-	-	-	-	GO:0044424//intracellular part	GO:0005515//protein binding;GO:0032550//purine ribonucleoside binding	GO:0044267//cellular protein metabolic process
MSTRG.10881.1	NW_011952054.1	1094054	1095445	+	MSTRG.10880	1088609	1090384	+	DOWNSTREAM	3669	--	Peptidyl-prolyl isomerase cwc27 [Papilio machaon]	-	-	-	-	-	-	-
MSTRG.10881.1	NW_011952054.1	1094054	1095445	+	MSTRG.10883	1096170	1098891	+	UPSTREAM	724	--	Peptidyl-prolyl isomerase cwc27 [Papilio machaon]	-	-	-	-	-	-	-
MSTRG.10891.1	NW_011952054.1	1152447	1154023	-	ncbi_105381323	1160102	1162325	+	UPSTREAM	6078	LOC105381323	ATP-dependent DNA helicase Q1-like	-	-	-	-	-	GO:0016787//hydrolase activity	-
MSTRG.10891.1	NW_011952054.1	1152447	1154023	-	ncbi_105381357	1163614	1165876	+	UPSTREAM	9590	LOC105381357	uncharacterized LOC105381357	-	-	-	-	-	-	-
MSTRG.10891.1	NW_011952054.1	1152447	1154023	-	ncbi_105381324	1162372	1164869	-	DOWNSTREAM	8348	LOC105381324	UPF0193 protein EVG1 homolog	-	-	-	-	-	-	-
MSTRG.10938.1	NW_011952055.1	263550	267296	-	ncbi_105381366	270549	274393	+	UPSTREAM	3252	LOC105381366	uncharacterized LOC105381366	-	-	-	-	-	-	-
MSTRG.10943.1	NW_011952055.1	288827	289802	-	ncbi_105381398	287667	288749	-	UPSTREAM	77	LOC105381398	cytochrome b5 isoform B	-	-	-	-	-	-	-
MSTRG.10944.1	NW_011952055.1	288827	290010	+	ncbi_105381398	287667	288749	-	UPSTREAM	77	LOC105381398	cytochrome b5 isoform B	-	-	-	-	-	-	-
MSTRG.11017.1	NW_011952055.1	827001	830736	+	ncbi_105381386	811976	818916	+	DOWNSTREAM	8084	LOC105381386	Krueppel homolog 2	-	-	-	-	-	-	-
MSTRG.11091.1	NW_011952056.1	208864	268868	+	ncbi_105381416	203864	205398	+	DOWNSTREAM	3465	LOC105381416	protein FAM177A1-like	-	-	-	-	-	-	-
XR_960490.1	NW_011952056.1	489955	492355	-	MSTRG.11133	495442	497194	+	UPSTREAM	3086	--	PREDICTED: uncharacterized protein LOC105397934, partial [Plutella xylostella]	-	-	-	-	-	-	-
MSTRG.11174.1	NW_011952056.1	821040	822271	-	ncbi_105381429	829846	831600	+	UPSTREAM	7574	LOC105381429	HIG1 domain family member 1A	-	-	-	-	GO:0031224//intrinsic component of membrane	-	-
MSTRG.11186.1	NW_011952056.1	859402	864925	+	MSTRG.11183	846032	849712	-	UPSTREAM	9689	--	Serine/threonine-protein kinase SBK1 [Operophtera brumata]	-	-	-	-	-	-	-
MSTRG.11186.1	NW_011952056.1	859402	864925	+	ncbi_105381434	850123	850761	-	UPSTREAM	8640	LOC105381434	uncharacterized LOC105381434	-	-	-	-	-	-	-
MSTRG.11228.1	NW_011952056.1	1155649	1156893	-	ncbi_105381471	1083955	1154210	+	DOWNSTREAM	1438	LOC105381471	uncharacterized LOC105381471	-	-	-	-	-	-	-
MSTRG.11231.1	NW_011952056.1	1195742	1196998	-	ncbi_105381445	1197503	1209123	+	UPSTREAM	504	LOC105381445	saccharopine dehydrogenase-like oxidoreductase	-	-	-	-	-	-	-
MSTRG.11231.1	NW_011952056.1	1195742	1196998	-	ncbi_105381472	1177720	1194024	-	UPSTREAM	1717	LOC105381472	protein cappuccino-like	Organismal Systems	Development	ko04320//Dorso-ventral axis formation	K02184	-	-	-
MSTRG.11264.2	NW_011952056.1	1365501	1367852	-	ncbi_105381453	1369519	1373813	+	UPSTREAM	1666	LOC105381453	protein THEM6-like	-	-	-	-	-	-	-
MSTRG.11277.1	NW_011952057.1	48086	53422	-	MSTRG.11278	53545	55361	-	DOWNSTREAM	122	--	-	-	-	-	-	-	-	-
MSTRG.11277.1	NW_011952057.1	48086	53422	-	ncbi_105381508	59622	60980	-	DOWNSTREAM	6199	LOC105381508	nuclear polyadenylated RNA-binding protein 4-like	Genetic Information Processing	Translation	ko03015//mRNA surveillance pathway	K14411	-	-	-
MSTRG.11332.1	NW_011952057.1	939893	945450	+	ncbi_105381494	945469	953895	-	DOWNSTREAM	18	LOC105381494	probable serine/threonine-protein kinase kinX	-	-	-	-	-	-	-
MSTRG.11579.1	NW_011952059.1	97008	98834	+	ncbi_105381579	100679	104057	+	UPSTREAM	1844	LOC105381579	dynein heavy chain 2	-	-	-	-	-	-	-
MSTRG.11579.1	NW_011952059.1	97008	98834	+	ncbi_105381621	105448	109629	+	UPSTREAM	6613	LOC105381621	dynein heavy chain 2	-	-	-	-	-	-	-
MSTRG.11647.1	NW_011952059.1	691307	697269	+	MSTRG.11648	697327	718380	+	UPSTREAM	57	--	reverse transcriptase [Ostrinia nubilalis]	-	-	-	-	-	-	-
MSTRG.11667.1	NW_011952059.1	808507	810097	-	ncbi_105381601	810411	814950	+	UPSTREAM	313	LOC105381601	3-hydroxyacyl-CoA dehydrogenase type-2	Metabolism;Metabolism;Metabolism;Metabolism	Global and overview maps;Global and overview maps;Global and overview maps;Amino acid metabolism	ko01100//Metabolic pathways;ko01110//Biosynthesis of secondary metabolites;ko01130//Biosynthesis of antibiotics;ko00280//Valine, leucine and isoleucine degradation	K08683;K08683;K08683;K08683	-	GO:0003824//catalytic activity	GO:0044710//single-organism metabolic process
MSTRG.11667.1	NW_011952059.1	808507	810097	-	ncbi_105381630	815096	838038	-	DOWNSTREAM	4998	LOC105381630	nuclear hormone receptor FTZ-F1-like	-	-	-	-	GO:0043231//intracellular membrane-bounded organelle	GO:0001071//nucleic acid binding transcription factor activity;GO:0003677//DNA binding;GO:0038023//signaling receptor activity;GO:0046914//transition metal ion binding	GO:0009755//hormone-mediated signaling pathway;GO:0010468//regulation of gene expression;GO:0034645//cellular macromolecule biosynthetic process
MSTRG.11834.1	NW_011952060.1	948025	949758	-	ncbi_105381673	950848	955335	-	DOWNSTREAM	1089	LOC105381673	alpha-tocopherol transfer protein-like	-	-	-	-	-	-	-
XR_960495.1	NW_011952061.1	180462	182258	+	ncbi_105381711	164212	171565	-	UPSTREAM	8896	LOC105381711	integrator complex subunit 3 homolog	-	-	-	-	-	-	-
XR_960495.1	NW_011952061.1	180462	182258	+	ncbi_105381716	185663	186984	-	DOWNSTREAM	3404	LOC105381716	syntaxin-18-like	Cellular Processes;Genetic Information Processing	Transport and catabolism;Folding, sorting and degradation	ko04145//Phagosome;ko04130//SNARE interactions in vesicular transport	K08492;K08492	-	-	-
XR_960495.1	NW_011952061.1	180462	182258	+	ncbi_105381713	171848	180292	+	DOWNSTREAM	169	LOC105381713	heterogeneous nuclear ribonucleoprotein M-like	-	-	-	-	-	-	-
MSTRG.11929.1	NW_011952061.1	241359	243961	+	ncbi_105381719	234418	237395	+	DOWNSTREAM	3963	LOC105381719	ras-related protein Rab-40C	-	-	-	-	-	-	-
MSTRG.11929.1	NW_011952061.1	241359	243961	+	ncbi_105381765	246607	263737	+	UPSTREAM	2645	LOC105381765	uncharacterized LOC105381765	-	-	-	-	-	-	-
MSTRG.11949.1	NW_011952061.1	351146	351697	-	ncbi_105381723	355671	374751	-	DOWNSTREAM	3973	LOC105381723	cilia- and flagella-associated protein 61	-	-	-	-	-	-	-
MSTRG.11964.1	NW_011952061.1	444097	450981	-	ncbi_105381730	439823	441429	-	UPSTREAM	2667	LOC105381730	adenosine deaminase CECR1-A-like	Metabolism;Metabolism	Global and overview maps;Nucleotide metabolism	ko01100//Metabolic pathways;ko00230//Purine metabolism	K19572;K19572	-	-	-
MSTRG.11975.1	NW_011952061.1	567156	569090	+	ncbi_105381771	575222	601774	+	UPSTREAM	6131	LOC105381771	optomotor-blind protein-like	-	-	-	-	GO:0043231//intracellular membrane-bounded organelle	GO:0001071//nucleic acid binding transcription factor activity	GO:0010468//regulation of gene expression;GO:0034645//cellular macromolecule biosynthetic process
MSTRG.11997.1	NW_011952061.1	744583	745314	+	ncbi_105381774	735683	743167	-	UPSTREAM	1415	LOC105381774	uncharacterized LOC105381774	-	-	-	-	-	-	-
MSTRG.12220.1	NW_011952062.1	974974	976763	+	MSTRG.12224	978616	979645	-	DOWNSTREAM	1852	--	PREDICTED: peregrin-like [Plutella xylostella]	-	-	-	-	-	-	-
MSTRG.12356.1	NW_011952063.1	996206	998242	+	ncbi_105381874	998906	1012666	+	UPSTREAM	663	LOC105381874	uncharacterized LOC105381874	-	-	-	-	-	-	-
MSTRG.12379.1	NW_011952064.1	20143	21491	+	ncbi_105381942	6577	12894	-	UPSTREAM	7248	LOC105381942	uncharacterized LOC105381942	Genetic Information Processing	Replication and repair	ko03430//Mismatch repair	K08739	-	-	-
MSTRG.12379.1	NW_011952064.1	20143	21491	+	ncbi_105381900	28050	29470	+	UPSTREAM	6558	LOC105381900	uncharacterized LOC105381900	-	-	-	-	-	-	-
MSTRG.12393.1	NW_011952064.1	79625	83052	-	ncbi_105381906	67103	69943	+	DOWNSTREAM	9681	LOC105381906	solute carrier family 46 member 3-like	-	-	-	-	-	-	-
MSTRG.12410.1	NW_011952064.1	237693	251178	-	ncbi_105381910	232496	234680	+	DOWNSTREAM	3012	LOC105381910	putative uncharacterized protein DDB_G0271982	-	-	-	-	-	-	-
MSTRG.12522.1	NW_011952064.1	1066807	1067968	-	ncbi_105381934	1054452	1063720	+	DOWNSTREAM	3086	LOC105381934	trypsin CFT-1-like	-	-	-	-	-	-	-
MSTRG.12522.1	NW_011952064.1	1066807	1067968	-	ncbi_105381973	1068029	1175569	-	DOWNSTREAM	60	LOC105381973	uncharacterized LOC105381973	-	-	-	-	-	-	-
MSTRG.12584.1	NW_011952065.1	423196	423664	+	ncbi_105381987	429565	431160	+	UPSTREAM	5900	LOC105381987	ATP synthase subunit O	Metabolism;Metabolism	Global and overview maps;Energy metabolism	ko01100//Metabolic pathways;ko00190//Oxidative phosphorylation	K02137;K02137	-	GO:0019829//cation-transporting ATPase activity	-
MSTRG.12584.1	NW_011952065.1	423196	423664	+	ncbi_105382016	431557	432118	-	DOWNSTREAM	7892	LOC105382016	C-Myc-binding protein homolog	-	-	-	-	-	-	-
XR_960508.1	NW_011952065.1	764036	791264	-	ncbi_105381996	748268	763820	-	UPSTREAM	215	LOC105381996	RNA binding protein fox-1 homolog 2	-	-	-	-	-	-	-
MSTRG.12726.1	NW_011952066.1	267615	268316	+	ncbi_105382044	269019	280117	+	UPSTREAM	702	LOC105382044	uncharacterized LOC105382044	-	-	-	-	-	-	-
MSTRG.12739.1	NW_011952066.1	427543	493709	-	ncbi_105382074	421903	427541	+	DOWNSTREAM	1	LOC105382074	heat shock 70 kDa protein 1-like	Cellular Processes;Genetic Information Processing;Genetic Information Processing;Organismal Systems	Transport and catabolism;Folding, sorting and degradation;Transcription;Aging	ko04144//Endocytosis;ko04141//Protein processing in endoplasmic reticulum;ko03040//Spliceosome;ko04213//Longevity regulating pathway - multiple species	K03283;K03283;K03283;K03283	-	-	-
MSTRG.12769.1	NW_011952066.1	788898	789829	+	ncbi_105382054	793909	796225	-	DOWNSTREAM	4079	LOC105382054	ejaculatory bulb-specific protein 1-like	-	-	-	-	-	-	-
MSTRG.12769.1	NW_011952066.1	788898	789829	+	ncbi_105382084	797435	811529	-	DOWNSTREAM	7605	LOC105382084	dnaJ homolog subfamily B member 12	Genetic Information Processing	Folding, sorting and degradation	ko04141//Protein processing in endoplasmic reticulum	K09518	-	-	-
MSTRG.12794.2	NW_011952066.1	906441	907488	-	ncbi_105382060	907815	935450	+	UPSTREAM	326	LOC105382060	uncharacterized LOC105382060	-	-	-	-	-	-	-
MSTRG.12794.3	NW_011952066.1	906441	907488	-	ncbi_105382060	907815	935450	+	UPSTREAM	326	LOC105382060	uncharacterized LOC105382060	-	-	-	-	-	-	-
MSTRG.12860.1	NW_011952067.1	24281	34289	-	ncbi_105382137	41440	58523	+	UPSTREAM	7150	LOC105382137	glyoxylate reductase/hydroxypyruvate reductase-like	Metabolism;Metabolism;Metabolism;Metabolism;Metabolism;Metabolism	Global and overview maps;Global and overview maps;Global and overview maps;Amino acid metabolism;Carbohydrate metabolism;Carbohydrate metabolism	ko01100//Metabolic pathways;ko01110//Biosynthesis of secondary metabolites;ko01120//Microbial metabolism in diverse environments;ko00260//Glycine, serine and threonine metabolism;ko00620//Pyruvate metabolism;ko00630//Glyoxylate and dicarboxylate metabolism	K00049;K00049;K00049;K00049;K00049;K00049	-	-	-
XR_960516.1	NW_011952067.1	29322	32888	+	ncbi_105382137	41440	58523	+	UPSTREAM	8551	LOC105382137	glyoxylate reductase/hydroxypyruvate reductase-like	Metabolism;Metabolism;Metabolism;Metabolism;Metabolism;Metabolism	Global and overview maps;Global and overview maps;Global and overview maps;Amino acid metabolism;Carbohydrate metabolism;Carbohydrate metabolism	ko01100//Metabolic pathways;ko01110//Biosynthesis of secondary metabolites;ko01120//Microbial metabolism in diverse environments;ko00260//Glycine, serine and threonine metabolism;ko00620//Pyruvate metabolism;ko00630//Glyoxylate and dicarboxylate metabolism	K00049;K00049;K00049;K00049;K00049;K00049	-	-	-
MSTRG.12913.1	NW_011952067.1	327456	329979	-	ncbi_105382143	320233	321790	-	UPSTREAM	5665	LOC105382143	extensin	-	-	-	-	-	-	-
MSTRG.12982.2	NW_011952067.1	930875	932860	+	ncbi_105382120	917725	921013	+	DOWNSTREAM	9861	LOC105382120	glucose dehydrogenase [FAD	Metabolism;Metabolism	Global and overview maps;Amino acid metabolism	ko01100//Metabolic pathways;ko00260//Glycine, serine and threonine metabolism	K00108;K00108	-	-	-
MSTRG.12982.2	NW_011952067.1	930875	932860	+	ncbi_105382122	938446	944742	-	DOWNSTREAM	5585	LOC105382122	acyl-CoA Delta(11) desaturase-like	Metabolism;Metabolism	Global and overview maps;Lipid metabolism	ko01212//Fatty acid metabolism;ko01040//Biosynthesis of unsaturated fatty acids	K00507;K00507	-	-	-
MSTRG.12996.1	NW_011952067.1	980115	991307	-	ncbi_105382127	992660	995219	-	DOWNSTREAM	1352	LOC105382127	transcription factor SPT20 homolog	-	-	-	-	-	-	-
MSTRG.12996.1	NW_011952067.1	980115	991307	-	ncbi_105382153	966127	974191	+	DOWNSTREAM	5923	LOC105382153	protein Spindly-B-like	-	-	-	-	-	-	-
MSTRG.13012.1	NW_011952067.1	1047241	1048778	+	ncbi_105382131	1037343	1046844	+	DOWNSTREAM	396	LOC105382131	UDP-glucuronosyltransferase 2B7-like	Metabolism;Metabolism;Metabolism;Metabolism;Metabolism;Metabolism;Metabolism;Metabolism;Metabolism;Metabolism	Global and overview maps;Global and overview maps;Carbohydrate metabolism;Carbohydrate metabolism;Xenobiotics biodegradation and metabolism;Xenobiotics biodegradation and metabolism;Metabolism of cofactors and vitamins;Xenobiotics biodegradation and metabolism;Carbohydrate metabolism;Metabolism of cofactors and vitamins	ko01100//Metabolic pathways;ko01110//Biosynthesis of secondary metabolites;ko00500//Starch and sucrose metabolism;ko00040//Pentose and glucuronate interconversions;ko00983//Drug metabolism - other enzymes;ko00980//Metabolism of xenobiotics by cytochrome P450;ko00860//Porphyrin and chlorophyll metabolism;ko00982//Drug metabolism - cytochrome P450;ko00053//Ascorbate and aldarate metabolism;ko00830/…	K00699;K00699;K00699;K00699;K00699;K00699;K00699;K00699;K00699;K00699	-	GO:0016740//transferase activity	-
MSTRG.13120.1	NW_011952068.1	593476	594288	-	ncbi_105382193	600082	604409	+	UPSTREAM	5793	LOC105382193	uncharacterized LOC105382193	-	-	-	-	-	-	-
MSTRG.13225.2	NW_011952069.1	394413	395452	-	ncbi_105382212	403058	404706	-	DOWNSTREAM	7605	LOC105382212	NEDD8-conjugating enzyme UBE2F-like	Genetic Information Processing	Folding, sorting and degradation	ko04120//Ubiquitin mediated proteolysis	K10687	-	GO:0003824//catalytic activity	-
MSTRG.13225.2	NW_011952069.1	394413	395452	-	ncbi_105382213	405042	408500	+	UPSTREAM	9589	LOC105382213	vacuolar protein-sorting-associated protein 25-like	Cellular Processes	Transport and catabolism	ko04144//Endocytosis	K12189	-	-	-
MSTRG.13242.2	NW_011952069.1	494384	495161	-	ncbi_105382257	483791	487543	+	DOWNSTREAM	6840	LOC105382257	serine/threonine-protein kinase pakG-like	-	-	-	-	-	-	-
MSTRG.13316.1	NW_011952070.1	27635	28975	+	ncbi_105382268	34472	44829	+	UPSTREAM	5496	LOC105382268	ras-related protein Rab-27A	-	-	-	-	-	-	-
MSTRG.13384.1	NW_011952070.1	665171	671436	+	ncbi_105382308	661238	663352	+	DOWNSTREAM	1818	LOC105382308	cytochrome b5-related protein-like	-	-	-	-	-	-	-
MSTRG.13497.2	NW_011952071.1	422528	424395	-	ncbi_105382401	397688	420732	-	UPSTREAM	1795	LOC105382401	probable ATP-dependent RNA helicase spindle-E	-	-	-	-	-	-	-
XR_960530.1	NW_011952071.1	844010	846537	+	ncbi_105382349	838098	840411	+	DOWNSTREAM	3598	LOC105382349	39S ribosomal protein L37	-	-	-	-	-	-	-
MSTRG.13610.2	NW_011952071.1	1116300	1120560	-	ncbi_105382415	1111309	1115767	+	DOWNSTREAM	532	LOC105382415	digestive organ expansion factor homolog	-	-	-	-	-	-	-
MSTRG.13610.2	NW_011952071.1	1116300	1120560	-	ncbi_105382381	1127647	1132881	+	UPSTREAM	7086	LOC105382381	4-coumarate--CoA ligase 1	-	-	-	-	-	-	-
MSTRG.13663.1	NW_011952072.1	122369	123399	+	ncbi_105382483	130935	153453	+	UPSTREAM	7535	LOC105382483	early endosome antigen 1-like	-	-	-	-	-	-	-
MSTRG.13679.2	NW_011952072.1	188915	219935	+	ncbi_105382426	181420	183103	-	UPSTREAM	5811	LOC105382426	transmembrane protein 17-like	-	-	-	-	-	-	-
MSTRG.13679.2	NW_011952072.1	188915	219935	+	ncbi_105382484	227248	251072	-	DOWNSTREAM	7312	LOC105382484	uncharacterized LOC105382484	-	-	-	-	-	-	-
MSTRG.13755.1	NW_011952072.1	755945	762830	-	ncbi_105382447	763710	766183	-	DOWNSTREAM	879	LOC105382447	transmembrane and ubiquitin-like domain-containing protein 2	-	-	-	-	-	-	-
MSTRG.13755.1	NW_011952072.1	755945	762830	-	ncbi_105382448	770834	781348	+	UPSTREAM	8003	LOC105382448	uncharacterized LOC105382448	-	-	-	-	-	-	-
MSTRG.13786.2	NW_011952072.1	916624	918266	-	ncbi_105382456	907503	910214	+	DOWNSTREAM	6409	LOC105382456	uncharacterized LOC105382456	-	-	-	-	-	-	-
MSTRG.13786.2	NW_011952072.1	916624	918266	-	ncbi_105382460	922725	934009	-	DOWNSTREAM	4458	LOC105382460	uncharacterized LOC105382460	-	-	-	-	-	-	-
MSTRG.13842.1	NW_011952073.1	86685	87060	+	MSTRG.13843	89205	90330	-	DOWNSTREAM	2144	--	hypothetical protein RR48_12658 [Papilio machaon]	-	-	-	-	-	-	-
MSTRG.13872.1	NW_011952073.1	314353	315336	-	MSTRG.13871	308551	310907	-	UPSTREAM	3445	--	-	-	-	-	-	-	-	-
XR_960536.1	NW_011952073.1	315858	317190	-	MSTRG.13871	308551	310907	-	UPSTREAM	4950	--	-	-	-	-	-	-	-	-
MSTRG.13967.2	NW_011952073.1	1071963	1072497	+	ncbi_105382538	1051617	1062113	+	DOWNSTREAM	9849	LOC105382538	glutamate receptor ionotropic	-	-	-	-	-	-	-
MSTRG.13998.1	NW_011952074.1	76820	79160	+	ncbi_105382610	87153	115599	-	DOWNSTREAM	7992	LOC105382610	apoptosis-stimulating of p53 protein 2	-	-	-	-	-	-	-
MSTRG.14026.1	NW_011952074.1	348549	349548	+	ncbi_105382612	352392	399522	+	UPSTREAM	2843	LOC105382612	uncharacterized LOC105382612	-	-	-	-	-	-	-
MSTRG.14051.3	NW_011952074.1	552995	553980	+	ncbi_105382576	550953	552660	+	DOWNSTREAM	334	LOC105382576	uncharacterized LOC105382576	-	-	-	-	-	-	-
MSTRG.14079.1	NW_011952074.1	716836	740333	-	ncbi_105382593	704573	712372	-	UPSTREAM	4463	LOC105382593	aromatic-L-amino-acid decarboxylase	Metabolism;Metabolism;Metabolism;Metabolism;Metabolism;Metabolism	Global and overview maps;Global and overview maps;Amino acid metabolism;Amino acid metabolism;Amino acid metabolism;Amino acid metabolism	ko01100//Metabolic pathways;ko01110//Biosynthesis of secondary metabolites;ko00380//Tryptophan metabolism;ko00350//Tyrosine metabolism;ko00340//Histidine metabolism;ko00360//Phenylalanine metabolism	K01593;K01593;K01593;K01593;K01593;K01593	-	GO:0016830//carbon-carbon lyase activity;GO:0043168//anion binding	GO:0019752//carboxylic acid metabolic process
MSTRG.14079.1	NW_011952074.1	716836	740333	-	MSTRG.14083	741166	751339	-	DOWNSTREAM	832	SETMAR	transposase [Attacus atlas]	Metabolism	Amino acid metabolism	ko00310//Lysine degradation	K11433	GO:0043231//intracellular membrane-bounded organelle;GO:0044427//chromosomal part	GO:0004520//endodeoxyribonuclease activity;GO:0018024//histone-lysine N-methyltransferase activity;GO:0019899//enzyme binding;GO:0043566//structure-specific DNA binding;GO:0046983//protein dimerization activity	GO:0006303//double-strand break repair via nonhomologous end joining;GO:0006308//DNA catabolic process;GO:0007093//mitotic cell cycle checkpoint;GO:0010452//histone H3-K36 methylation;GO:0010912//positive regulation of isomerase activity;GO:0010948//negative regulation of cell cycle process
MSTRG.14200.1	NW_011952075.1	623487	645198	-	ncbi_105382637	647074	661369	+	UPSTREAM	1875	LOC105382637	uncharacterized LOC105382637	-	-	-	-	-	-	-
MSTRG.14210.1	NW_011952075.1	710621	711729	-	ncbi_105382641	708515	709595	-	UPSTREAM	1025	LOC105382641	thioredoxin domain-containing protein 12-like	Metabolism	Metabolism of other amino acids	ko00480//Glutathione metabolism	K05360	-	-	-
MSTRG.14211.1	NW_011952075.1	713278	714048	-	ncbi_105382641	708515	709595	-	UPSTREAM	3682	LOC105382641	thioredoxin domain-containing protein 12-like	Metabolism	Metabolism of other amino acids	ko00480//Glutathione metabolism	K05360	-	-	-
MSTRG.14266.1	NW_011952076.1	37397	38021	+	ncbi_105382697	25133	35047	+	DOWNSTREAM	2349	LOC105382697	RB1-inducible coiled-coil protein 1-like	-	-	-	-	-	-	-
MSTRG.14332.1	NW_011952076.1	694164	695912	-	ncbi_105382683	697003	717195	-	DOWNSTREAM	1090	LOC105382683	ras-specific guanine nucleotide-releasing factor RalGPS1-like	-	-	-	-	-	-	-
MSTRG.14342.1	NW_011952076.1	756409	757184	+	ncbi_105382715	757542	824914	-	DOWNSTREAM	357	LOC105382715	dynein heavy chain 6	-	-	-	-	GO:0043226//organelle;GO:0044464//cell part	-	-
MSTRG.14350.1	NW_011952076.1	883024	885009	+	ncbi_105382720	864623	881327	+	DOWNSTREAM	1696	LOC105382720	type I inositol 3	Metabolism;Environmental Information Processing;Metabolism	Global and overview maps;Signal transduction;Carbohydrate metabolism	ko01100//Metabolic pathways;ko04070//Phosphatidylinositol signaling system;ko00562//Inositol phosphate metabolism	K01109;K01109;K01109	-	-	-
MSTRG.14350.1	NW_011952076.1	883024	885009	+	ncbi_105382686	889057	943671	-	DOWNSTREAM	4047	LOC105382686	protein phosphatase 1 regulatory subunit 12B	-	-	-	-	-	-	-
MSTRG.14400.2	NW_011952077.1	202378	205154	+	ncbi_105382759	191689	195417	-	UPSTREAM	6960	LOC105382759	protein crumbs-like	Environmental Information Processing	Signal transduction	ko04391//Hippo signaling pathway -fly	K16681	-	-	-
MSTRG.14400.2	NW_011952077.1	202378	205154	+	ncbi_105382760	197732	200807	+	DOWNSTREAM	1570	LOC105382760	uncharacterized LOC105382760	-	-	-	-	-	-	-
MSTRG.14436.2	NW_011952077.1	426079	429779	-	ncbi_105382731	419217	423840	+	DOWNSTREAM	2238	LOC105382731	uncharacterized LOC105382731	-	-	-	-	-	-	-
MSTRG.14470.1	NW_011952077.1	862067	865129	-	ncbi_105382739	854880	861458	-	UPSTREAM	608	LOC105382739	zinc finger protein 2 homolog	-	-	-	-	-	-	-
MSTRG.14470.1	NW_011952077.1	862067	865129	-	ncbi_105382774	870183	878284	-	DOWNSTREAM	5053	LOC105382774	beta-1-syntrophin-like	-	-	-	-	-	GO:0016787//hydrolase activity	-
MSTRG.14490.1	NW_011952077.1	1023719	1024301	+	ncbi_105382744	1014690	1020494	+	DOWNSTREAM	3224	LOC105382744	uncharacterized LOC105382744	-	-	-	-	-	-	-
MSTRG.14544.1	NW_011952078.1	133472	134350	-	ncbi_105382791	135711	145821	-	DOWNSTREAM	1360	LOC105382791	synaptotagmin-4	-	-	-	-	-	-	-
MSTRG.14544.1	NW_011952078.1	133472	134350	-	ncbi_105382847	124799	132226	+	DOWNSTREAM	1245	LOC105382847	tumor necrosis factor	-	-	-	-	-	-	-
MSTRG.14659.3	NW_011952078.1	894735	895508	+	ncbi_105382860	900647	904620	+	UPSTREAM	5138	LOC105382860	xanthine dehydrogenase-like	Metabolism;Metabolism;Metabolism;Metabolism;Cellular Processes;Metabolism;Metabolism	Global and overview maps;Global and overview maps;Global and overview maps;Nucleotide metabolism;Transport and catabolism;Xenobiotics biodegradation and metabolism;Biosynthesis of other secondary metabolites	ko01100//Metabolic pathways;ko01110//Biosynthesis of secondary metabolites;ko01120//Microbial metabolism in diverse environments;ko00230//Purine metabolism;ko04146//Peroxisome;ko00983//Drug metabolism - other enzymes;ko00232//Caffeine metabolism	K00106;K00106;K00106;K00106;K00106;K00106;K00106	-	GO:0000166//nucleotide binding;GO:0016616//oxidoreductase activity, acting on the CH-OH group of donors, NAD or NADP as acceptor;GO:0043169//cation binding;GO:0050662//coenzyme binding	GO:0044710//single-organism metabolic process
MSTRG.14711.1	NW_011952078.1	1078630	1080038	+	ncbi_105382836	1089360	1111178	-	DOWNSTREAM	9321	LOC105382836	repetitive proline-rich cell wall protein 1	-	-	-	-	-	-	-
MSTRG.14715.2	NW_011952078.1	1089280	1111270	+	ncbi_105382865	1078631	1080038	+	DOWNSTREAM	9241	LOC105382865	glycine-rich cell wall structural protein-like	-	-	-	-	-	-	-
MSTRG.14730.2	NW_011952079.1	21827	24614	-	ncbi_105382866	11858	21660	+	DOWNSTREAM	166	LOC105382866	V-type proton ATPase 116 kDa subunit a isoform 1-like	Metabolism;Metabolism;Cellular Processes;Cellular Processes	Global and overview maps;Energy metabolism;Transport and catabolism;Transport and catabolism	ko01100//Metabolic pathways;ko00190//Oxidative phosphorylation;ko04142//Lysosome;ko04145//Phagosome	K02154;K02154;K02154;K02154	-	-	-
MSTRG.14732.1	NW_011952079.1	36555	63969	+	ncbi_105382868	67125	93198	+	UPSTREAM	3155	LOC105382868	uncharacterized LOC105382868	-	-	-	-	-	-	-
MSTRG.14856.1	NW_011952080.1	66142	71746	-	ncbi_105382943	81639	85106	+	UPSTREAM	9892	LOC105382943	LIX1-like protein	Environmental Information Processing	Signal transduction	ko04391//Hippo signaling pathway -fly	K16673	-	-	-
MSTRG.14886.1	NW_011952080.1	438731	439363	-	ncbi_105382913	429235	432596	-	UPSTREAM	6134	LOC105382913	uncharacterized LOC105382913	-	-	-	-	-	-	-
MSTRG.14886.1	NW_011952080.1	438731	439363	-	ncbi_105382911	433234	436984	-	UPSTREAM	1746	LOC105382911	uncharacterized LOC105382911	-	-	-	-	-	-	-
MSTRG.15039.1	NW_011952081.1	635341	636920	-	ncbi_105382969	646419	655041	-	DOWNSTREAM	9498	LOC105382969	protein sly1 homolog	-	-	-	-	-	-	-
MSTRG.15039.1	NW_011952081.1	635341	636920	-	ncbi_105382968	638432	642578	+	UPSTREAM	1511	LOC105382968	calcium/calmodulin-dependent protein kinase type 1	-	-	-	-	-	GO:0004672//protein kinase activity;GO:0032550//purine ribonucleoside binding	GO:0006464//cellular protein modification process;GO:0006796//phosphate-containing compound metabolic process
MSTRG.15048.1	NW_011952081.1	691228	696214	+	ncbi_105382998	655834	686471	+	DOWNSTREAM	4756	LOC105382998	uncharacterized LOC105382998	-	-	-	-	-	-	-
MSTRG.15070.2	NW_011952081.1	826101	826690	-	ncbi_105383001	818400	820196	+	DOWNSTREAM	5904	LOC105383001	coiled-coil domain-containing protein 112-like	-	-	-	-	-	-	-
MSTRG.15070.3	NW_011952081.1	826106	826685	-	ncbi_105383001	818400	820196	+	DOWNSTREAM	5909	LOC105383001	coiled-coil domain-containing protein 112-like	-	-	-	-	-	-	-
MSTRG.15089.3	NW_011952081.1	1008661	1009841	-	ncbi_105382981	997907	1004312	+	DOWNSTREAM	4348	LOC105382981	uncharacterized LOC105382981	-	-	-	-	-	-	-
MSTRG.15104.2	NW_011952082.1	16361	37638	-	ncbi_105383013	44030	46689	+	UPSTREAM	6391	LOC105383013	vacuolar protein sorting-associated protein VTA1 homolog	Cellular Processes	Transport and catabolism	ko04144//Endocytosis	K12199	-	-	-
MSTRG.15104.2	NW_011952082.1	16361	37638	-	ncbi_105383014	46855	51001	-	DOWNSTREAM	9216	LOC105383014	transmembrane protein 35	-	-	-	-	-	-	-
MSTRG.15111.11	NW_011952082.1	57152	59468	-	ncbi_105383014	46855	51001	-	UPSTREAM	6150	LOC105383014	transmembrane protein 35	-	-	-	-	-	-	-
MSTRG.15128.7	NW_011952082.1	223610	241906	-	MSTRG.15132	248118	250174	+	UPSTREAM	6211	--	PREDICTED: RNA-directed DNA polymerase from mobile element jockey-like [Plutella xylostella]	-	-	-	-	-	-	-
MSTRG.15151.1	NW_011952082.1	372399	375587	-	ncbi_105383028	362603	367545	-	UPSTREAM	4853	LOC105383028	uncharacterized protein YGR130C-like	-	-	-	-	-	-	-
MSTRG.15276.1	NW_011952083.1	284029	289895	-	ncbi_105383090	296448	304111	-	DOWNSTREAM	6552	LOC105383090	dynactin subunit 4-like	-	-	-	-	-	-	-
MSTRG.15518.1	NW_011952084.1	1106365	1108107	-	ncbi_105383138	1096393	1104611	+	DOWNSTREAM	1753	LOC105383138	TBC1 domain family member 16-like	-	-	-	-	-	-	-
MSTRG.15551.1	NW_011952085.1	243278	244778	-	ncbi_105383209	230089	240648	-	UPSTREAM	2629	LOC105383209	uncharacterized LOC105383209	-	-	-	-	-	-	GO:0007165//signal transduction;GO:0007411//axon guidance
MSTRG.15550.7	NW_011952085.1	252610	267364	-	ncbi_105383175	268533	270119	-	DOWNSTREAM	1168	LOC105383175	leucine-rich repeat-containing protein 34	-	-	-	-	-	-	-
MSTRG.15579.1	NW_011952085.1	445033	451194	+	ncbi_105383220	456213	467533	+	UPSTREAM	5018	LOC105383220	uncharacterized LOC105383220	-	-	-	-	-	-	-
XR_960565.1	NW_011952085.1	498789	501996	-	ncbi_105383221	502051	509224	-	DOWNSTREAM	54	LOC105383221	clusterin-associated protein 1	-	-	-	-	-	-	-
MSTRG.15586.1	NW_011952085.1	513058	557627	+	ncbi_105383221	502051	509224	-	UPSTREAM	3833	LOC105383221	clusterin-associated protein 1	-	-	-	-	-	-	-
MSTRG.15645.2	NW_011952085.1	1050512	1051126	-	ncbi_105383231	1055799	1059219	+	UPSTREAM	4672	LOC105383231	probable uridine nucleosidase 2	-	-	-	-	-	-	-
MSTRG.15952.1	NW_011952088.1	414487	443408	+	ncbi_105383359	451872	634829	+	UPSTREAM	8463	LOC105383359	protein amalgam-like	-	-	-	-	-	-	-
MSTRG.16162.1	NW_011952090.1	349502	350338	+	ncbi_105383435	331952	348970	+	DOWNSTREAM	531	LOC105383435	homeobox protein XHOX-7.1-like	-	-	-	-	-	-	-
MSTRG.16301.1	NW_011952091.1	266823	267561	+	ncbi_105383504	234741	257992	+	DOWNSTREAM	8830	LOC105383504	myosin light chain kinase	-	-	-	-	-	-	-
MSTRG.16345.1	NW_011952091.1	534836	539799	-	ncbi_105383486	548091	551315	+	UPSTREAM	8291	LOC105383486	proton-coupled amino acid transporter 4-like	-	-	-	-	-	-	-
MSTRG.16398.2	NW_011952092.1	31967	33349	+	ncbi_105383545	40833	96841	+	UPSTREAM	7483	LOC105383545	uncharacterized LOC105383545	-	-	-	-	-	-	-
MSTRG.16411.1	NW_011952092.1	104914	105607	+	ncbi_105383514	102093	102788	+	DOWNSTREAM	2125	LOC105383514	protein lethal(2)essential for life-like	Genetic Information Processing;Organismal Systems	Folding, sorting and degradation;Aging	ko04141//Protein processing in endoplasmic reticulum;ko04213//Longevity regulating pathway - multiple species	K09542;K09542	-	-	-
MSTRG.16411.1	NW_011952092.1	104914	105607	+	ncbi_105383545	40833	96841	+	DOWNSTREAM	8072	LOC105383545	uncharacterized LOC105383545	-	-	-	-	-	-	-
MSTRG.16411.1	NW_011952092.1	104914	105607	+	ncbi_105383517	106052	142202	+	UPSTREAM	444	LOC105383517	plastin-3	-	-	-	-	-	-	-
MSTRG.16455.1	NW_011952092.1	412606	415366	+	ncbi_105383525	406266	407232	-	UPSTREAM	5373	LOC105383525	uncharacterized LOC105383525	-	-	-	-	-	-	-
MSTRG.16517.2	NW_011952093.1	43428	46395	-	ncbi_105383559	54221	58011	-	DOWNSTREAM	7825	LOC105383559	origin recognition complex subunit 6	-	-	-	-	-	-	-
MSTRG.16517.2	NW_011952093.1	43428	46395	-	ncbi_105383557	3781	35056	-	UPSTREAM	8371	LOC105383557	sodium/hydrogen exchanger 10-like	-	-	-	-	-	-	-
MSTRG.16520.1	NW_011952093.1	45624	51947	+	ncbi_105383559	54221	58011	-	DOWNSTREAM	2273	LOC105383559	origin recognition complex subunit 6	-	-	-	-	-	-	-
MSTRG.16520.1	NW_011952093.1	45624	51947	+	ncbi_105383560	60567	68441	+	UPSTREAM	8619	LOC105383560	exportin-2	-	-	-	-	-	-	-
MSTRG.16521.1	NW_011952093.1	46497	53612	-	MSTRG.16517	40630	46395	-	UPSTREAM	101	--	PREDICTED: protein ANTAGONIST OF LIKE HETEROCHROMATIN PROTEIN 1-like [Cerapachys biroi]	-	-	-	-	-	-	-
MSTRG.16521.1	NW_011952093.1	46497	53612	-	ncbi_105383559	54221	58011	-	DOWNSTREAM	608	LOC105383559	origin recognition complex subunit 6	-	-	-	-	-	-	-
MSTRG.16521.1	NW_011952093.1	46497	53612	-	ncbi_105383560	60567	68441	+	UPSTREAM	6954	LOC105383560	exportin-2	-	-	-	-	-	-	-
MSTRG.16604.1	NW_011952093.1	789065	795943	-	ncbi_105383570	796423	798869	-	DOWNSTREAM	479	LOC105383570	trypsin	Environmental Information Processing	Signaling molecules and interaction	ko04080//Neuroactive ligand-receptor interaction	K01312	-	-	-
MSTRG.16604.1	NW_011952093.1	789065	795943	-	ncbi_105383571	785811	788519	+	DOWNSTREAM	545	LOC105383571	trypsin	Environmental Information Processing	Signaling molecules and interaction	ko04080//Neuroactive ligand-receptor interaction	K01312	-	-	-
MSTRG.16604.2	NW_011952093.1	789065	795943	-	ncbi_105383570	796423	798869	-	DOWNSTREAM	479	LOC105383570	trypsin	Environmental Information Processing	Signaling molecules and interaction	ko04080//Neuroactive ligand-receptor interaction	K01312	-	-	-
MSTRG.16604.2	NW_011952093.1	789065	795943	-	ncbi_105383571	785811	788519	+	DOWNSTREAM	545	LOC105383571	trypsin	Environmental Information Processing	Signaling molecules and interaction	ko04080//Neuroactive ligand-receptor interaction	K01312	-	-	-
MSTRG.16604.3	NW_011952093.1	789065	795943	-	ncbi_105383570	796423	798869	-	DOWNSTREAM	479	LOC105383570	trypsin	Environmental Information Processing	Signaling molecules and interaction	ko04080//Neuroactive ligand-receptor interaction	K01312	-	-	-
MSTRG.16604.3	NW_011952093.1	789065	795943	-	ncbi_105383571	785811	788519	+	DOWNSTREAM	545	LOC105383571	trypsin	Environmental Information Processing	Signaling molecules and interaction	ko04080//Neuroactive ligand-receptor interaction	K01312	-	-	-
XR_960590.1	NW_011952093.1	914163	919696	-	ncbi_105383582	903563	909742	+	DOWNSTREAM	4420	LOC105383582	putative mediator of RNA polymerase II transcription subunit 12	-	-	-	-	-	-	-
MSTRG.16720.1	NW_011952094.1	842843	845644	-	ncbi_105383616	848073	848932	-	DOWNSTREAM	2428	LOC105383616	ras-responsive element-binding protein 1-like	-	-	-	-	-	-	-
MSTRG.16780.1	NW_011952095.1	394137	394830	+	ncbi_105383648	372724	386796	+	DOWNSTREAM	7340	LOC105383648	dermokine-like	-	-	-	-	-	-	-
MSTRG.16910.1	NW_011952096.1	629618	631375	+	ncbi_105383698	579767	621398	+	DOWNSTREAM	8219	LOC105383698	uncharacterized LOC105383698	-	-	-	-	-	-	-
MSTRG.16978.1	NW_011952097.1	108923	110373	-	ncbi_105383738	110783	113448	-	DOWNSTREAM	409	LOC105383738	laminin-like protein epi-1	-	-	-	-	-	-	-
MSTRG.16988.1	NW_011952097.1	192197	217901	+	ncbi_105383736	145337	186969	+	DOWNSTREAM	5227	LOC105383736	uncharacterized LOC105383736	-	-	-	-	-	-	-
MSTRG.17060.13	NW_011952097.1	851317	887852	+	ncbi_105383760	843989	850583	+	DOWNSTREAM	733	LOC105383760	acetyl-CoA carboxylase-like	Metabolism;Metabolism;Metabolism;Metabolism;Metabolism;Metabolism	Global and overview maps;Global and overview maps;Global and overview maps;Carbohydrate metabolism;Carbohydrate metabolism;Lipid metabolism	ko01100//Metabolic pathways;ko01110//Biosynthesis of secondary metabolites;ko01212//Fatty acid metabolism;ko00620//Pyruvate metabolism;ko00640//Propanoate metabolism;ko00061//Fatty acid biosynthesis	K11262;K11262;K11262;K11262;K11262;K11262	-	-	-
MSTRG.17060.13	NW_011952097.1	851317	887852	+	ncbi_105383758	888143	891915	-	DOWNSTREAM	290	LOC105383758	uncharacterized LOC105383758	-	-	-	-	-	-	-
MSTRG.17084.2	NW_011952098.1	27644	28346	+	ncbi_105383781	6390	27515	+	DOWNSTREAM	128	LOC105383781	uncharacterized LOC105383781	-	-	-	-	-	-	-
MSTRG.17084.2	NW_011952098.1	27644	28346	+	ncbi_105383782	31142	63363	+	UPSTREAM	2795	LOC105383782	cyclin-dependent kinase inhibitor 1-like	-	-	-	-	-	-	-
MSTRG.17089.1	NW_011952098.1	70874	85439	-	ncbi_105383782	31142	63363	+	DOWNSTREAM	7510	LOC105383782	cyclin-dependent kinase inhibitor 1-like	-	-	-	-	-	-	-
MSTRG.17138.1	NW_011952098.1	527764	528322	-	ncbi_105383799	535052	543095	+	UPSTREAM	6729	LOC105383799	peptidyl-prolyl cis-trans isomerase FKBP4-like	-	-	-	-	-	-	-
MSTRG.17186.1	NW_011952098.1	987507	989965	-	ncbi_105383825	990451	997113	+	UPSTREAM	485	LOC105383825	uncharacterized LOC105383825	-	-	-	-	-	-	-
MSTRG.17186.1	NW_011952098.1	987507	989965	-	ncbi_105383824	963358	981579	-	UPSTREAM	5927	LOC105383824	uncharacterized LOC105383824	-	-	-	-	-	-	-
MSTRG.17192.1	NW_011952098.1	1016982	1017734	-	ncbi_105383803	1001291	1008425	-	UPSTREAM	8556	LOC105383803	rab-like protein 6	-	-	-	-	-	-	-
MSTRG.17192.1	NW_011952098.1	1016982	1017734	-	ncbi_105383804	1009387	1009992	-	UPSTREAM	6989	LOC105383804	small integral membrane protein 8	-	-	-	-	-	-	-
MSTRG.17192.1	NW_011952098.1	1016982	1017734	-	ncbi_105383827	1018092	1036868	-	DOWNSTREAM	357	LOC105383827	regulating synaptic membrane exocytosis protein 1	-	-	-	-	-	-	-
MSTRG.17209.2	NW_011952099.1	28925	29895	-	ncbi_105383831	27190	28609	+	DOWNSTREAM	315	LOC105383831	FUN14 domain-containing protein 1-like	-	-	-	-	-	-	-
XR_960600.1	NW_011952099.1	572940	576071	+	ncbi_105383853	580701	584654	-	DOWNSTREAM	4629	LOC105383853	leukocyte receptor cluster member 8 homolog	-	-	-	-	-	GO:0003824//catalytic activity	GO:0008152//metabolic process
MSTRG.17405.1	NW_011952100.1	533928	546366	+	ncbi_105383907	548826	562163	+	UPSTREAM	2459	LOC105383907	5-hydroxytryptamine receptor 3A	-	-	-	-	-	-	-
MSTRG.17443.1	NW_011952100.1	843345	843892	-	MSTRG.17441	836165	838444	+	DOWNSTREAM	4900	--	PREDICTED: protein son of sevenless-like [Plutella xylostella]	-	-	-	-	-	-	-
MSTRG.17671.1	NW_011952102.1	809529	810633	+	ncbi_105384029	793901	802149	+	DOWNSTREAM	7379	LOC105384029	general transcription factor IIH subunit 4-like	Genetic Information Processing;Genetic Information Processing	Replication and repair;Transcription	ko03420//Nucleotide excision repair;ko03022//Basal transcription factors	K03144;K03144	-	-	-
MSTRG.17671.1	NW_011952102.1	809529	810633	+	ncbi_105384030	815170	817776	+	UPSTREAM	4536	LOC105384030	delta(24)-sterol reductase-like	Metabolism;Metabolism;Metabolism	Global and overview maps;Global and overview maps;Lipid metabolism	ko01100//Metabolic pathways;ko01110//Biosynthesis of secondary metabolites;ko00100//Steroid biosynthesis	K09828;K09828;K09828	-	GO:0016614//oxidoreductase activity, acting on CH-OH group of donors	-
MSTRG.17689.2	NW_011952102.1	925219	930687	-	ncbi_105384057	933106	947829	-	DOWNSTREAM	2418	LOC105384057	nose resistant to fluoxetine protein 6-like	-	-	-	-	-	-	-
MSTRG.17774.1	NW_011952103.1	399623	400818	+	ncbi_105384079	410365	422209	+	UPSTREAM	9546	LOC105384079	caskin-2	-	-	-	-	-	-	-
MSTRG.17774.2	NW_011952103.1	399625	400818	+	ncbi_105384079	410365	422209	+	UPSTREAM	9546	LOC105384079	caskin-2	-	-	-	-	-	-	-
MSTRG.17785.1	NW_011952103.1	430092	436373	+	ncbi_105384079	410365	422209	+	DOWNSTREAM	7882	LOC105384079	caskin-2	-	-	-	-	-	-	-
MSTRG.17785.1	NW_011952103.1	430092	436373	+	ncbi_105384080	439756	441386	-	DOWNSTREAM	3382	LOC105384080	histone acetyltransferase KAT8-like	-	-	-	-	GO:0043231//intracellular membrane-bounded organelle	GO:0016746//transferase activity, transferring acyl groups	GO:0010468//regulation of gene expression;GO:0016570//histone modification
MSTRG.17785.1	NW_011952103.1	430092	436373	+	ncbi_105384094	424736	429933	+	DOWNSTREAM	158	LOC105384094	synaptogyrin-1	-	-	-	-	-	-	-
MSTRG.17793.1	NW_011952103.1	464551	465230	-	ncbi_105384082	467590	482762	+	UPSTREAM	2359	LOC105384082	dihydropyrimidine dehydrogenase [NADP(+)]-like	Metabolism;Metabolism;Metabolism;Metabolism;Metabolism	Global and overview maps;Nucleotide metabolism;Xenobiotics biodegradation and metabolism;Metabolism of other amino acids;Metabolism of cofactors and vitamins	ko01100//Metabolic pathways;ko00240//Pyrimidine metabolism;ko00983//Drug metabolism - other enzymes;ko00410//beta-Alanine metabolism;ko00770//Pantothenate and CoA biosynthesis	K00207;K00207;K00207;K00207;K00207	-	-	-
XR_960612.1	NW_011952104.1	402389	404595	+	ncbi_105384116	405326	407800	-	DOWNSTREAM	730	LOC105384116	heparanase-like	Metabolism;Metabolism	Global and overview maps;Glycan biosynthesis and metabolism	ko01100//Metabolic pathways;ko00531//Glycosaminoglycan degradation	K07964;K07964	-	GO:0016787//hydrolase activity	-
MSTRG.17895.1	NW_011952104.1	416917	422679	+	ncbi_105384116	405326	407800	-	UPSTREAM	9116	LOC105384116	heparanase-like	Metabolism;Metabolism	Global and overview maps;Glycan biosynthesis and metabolism	ko01100//Metabolic pathways;ko00531//Glycosaminoglycan degradation	K07964;K07964	-	GO:0016787//hydrolase activity	-
MSTRG.17946.1	NW_011952105.1	73591	74346	+	ncbi_105384168	69095	72358	+	DOWNSTREAM	1232	LOC105384168	uncharacterized LOC105384168	-	-	-	-	-	-	-
MSTRG.17947.1	NW_011952105.1	74410	75766	-	ncbi_105384168	69095	72358	+	DOWNSTREAM	2051	LOC105384168	uncharacterized LOC105384168	-	-	-	-	-	-	-
MSTRG.18041.3	NW_011952106.1	879	9188	-	ncbi_105384220	10080	10734	+	UPSTREAM	891	LOC105384220	sphingomyelin phosphodiesterase 4	Metabolism;Metabolism	Global and overview maps;Lipid metabolism	ko01100//Metabolic pathways;ko00600//Sphingolipid metabolism	K12353;K12353	-	-	-
MSTRG.18096.1	NW_011952106.1	517325	517894	-	ncbi_105384200	482723	510493	-	UPSTREAM	6831	LOC105384200	uncharacterized LOC105384200	-	-	-	-	-	-	-
MSTRG.18096.1	NW_011952106.1	517325	517894	-	ncbi_105384228	525583	570809	-	DOWNSTREAM	7688	LOC105384228	WD repeat and FYVE domain-containing protein 3	-	-	-	-	-	-	-
MSTRG.18160.1	NW_011952107.1	4543	4938	-	ncbi_105384272	14181	28692	+	UPSTREAM	9242	LOC105384272	cAMP and cAMP-inhibited cGMP 3'	Metabolism	Nucleotide metabolism	ko00230//Purine metabolism	K18438	-	-	-
MSTRG.18168.1	NW_011952107.1	51119	87585	+	ncbi_105384279	90985	116582	-	DOWNSTREAM	3399	LOC105384279	integrator complex subunit 7-like	-	-	-	-	-	-	-
MSTRG.18169.1	NW_011952107.1	53981	88531	-	ncbi_105384279	90985	116582	-	DOWNSTREAM	2453	LOC105384279	integrator complex subunit 7-like	-	-	-	-	-	-	-
MSTRG.18232.1	NW_011952107.1	789507	794411	+	ncbi_105384294	799579	800979	-	DOWNSTREAM	5167	LOC105384294	uncharacterized LOC105384294	-	-	-	-	-	-	-
MSTRG.18241.1	NW_011952107.1	820016	889414	+	ncbi_105384268	892009	897450	-	DOWNSTREAM	2594	LOC105384268	polypeptide N-acetylgalactosaminyltransferase 1-like	Metabolism;Metabolism	Global and overview maps;Glycan biosynthesis and metabolism	ko01100//Metabolic pathways;ko00512//Mucin type O-glycan biosynthesis	K00710;K00710	-	-	-
MSTRG.18274.1	NW_011952108.1	103419	105166	+	ncbi_105384306	91304	99892	+	DOWNSTREAM	3526	LOC105384306	ATP-dependent RNA helicase DDX42-like	Genetic Information Processing	Transcription	ko03040//Spliceosome	K12835	-	-	-
XR_960617.1	NW_011952108.1	341549	357631	-	ncbi_105384308	331588	341476	-	UPSTREAM	72	LOC105384308	protein halfway	-	-	-	-	-	-	-
MSTRG.18289.1	NW_011952108.1	376971	378816	+	ncbi_105384338	386246	435955	-	DOWNSTREAM	7429	LOC105384338	SEC14-like protein 5	-	-	-	-	-	-	-
MSTRG.18397.2	NW_011952109.1	197356	198241	-	ncbi_105384356	194764	197100	+	DOWNSTREAM	255	LOC105384356	uncharacterized LOC105384356	Metabolism;Metabolism;Metabolism;Metabolism	Global and overview maps;Global and overview maps;Global and overview maps;Nucleotide metabolism	ko01100//Metabolic pathways;ko01110//Biosynthesis of secondary metabolites;ko01130//Biosynthesis of antibiotics;ko00230//Purine metabolism	K00939;K00939;K00939;K00939	-	GO:0016740//transferase activity	GO:0009117//nucleotide metabolic process
MSTRG.18400.1	NW_011952109.1	281948	285512	+	ncbi_105384377	197355	278795	-	UPSTREAM	3152	LOC105384377	adenylate kinase isoenzyme 1-like	Metabolism;Metabolism;Metabolism;Metabolism	Global and overview maps;Global and overview maps;Global and overview maps;Nucleotide metabolism	ko01100//Metabolic pathways;ko01110//Biosynthesis of secondary metabolites;ko01130//Biosynthesis of antibiotics;ko00230//Purine metabolism	K00939;K00939;K00939;K00939	-	-	-
MSTRG.18411.6	NW_011952109.1	330065	332666	-	ncbi_105384357	321215	323187	-	UPSTREAM	6877	LOC105384357	uncharacterized LOC105384357	-	-	-	-	-	-	-
XR_960619.1	NW_011952110.1	196268	197902	-	ncbi_105384425	206347	213743	-	DOWNSTREAM	8444	LOC105384425	insulinoma-associated protein 1	-	-	-	-	GO:0043231//intracellular membrane-bounded organelle	GO:0001071//nucleic acid binding transcription factor activity;GO:0005488//binding	GO:0007548//sex differentiation;GO:0008049//male courtship behavior;GO:0016198//axon choice point recognition;GO:0048513//animal organ development;GO:0090066//regulation of anatomical structure size
MSTRG.18571.3	NW_011952110.1	525254	525898	+	ncbi_105384412	470430	519654	+	DOWNSTREAM	5599	LOC105384412	histone-lysine N-methyltransferase SETD1B-A-like	-	-	-	-	-	-	-
MSTRG.18828.1	NW_011952112.1	757946	766956	+	ncbi_105384519	742411	748180	+	DOWNSTREAM	9765	LOC105384519	fibroin light chain-like	-	-	-	-	-	-	-
MSTRG.18828.1	NW_011952112.1	757946	766956	+	ncbi_105384520	749052	750965	-	UPSTREAM	6980	LOC105384520	uncharacterized LOC105384520	-	-	-	-	-	-	-
MSTRG.18958.1	NW_011952114.1	30559	34270	-	ncbi_105384617	43332	50833	+	UPSTREAM	9061	LOC105384617	proton-coupled amino acid transporter 4-like	-	-	-	-	-	-	-
MSTRG.19018.1	NW_011952114.1	452447	453520	+	ncbi_105384627	410703	452301	+	DOWNSTREAM	145	LOC105384627	cytoplasmic aconitate hydratase-like	Metabolism;Metabolism;Metabolism;Metabolism;Metabolism;Metabolism;Metabolism;Metabolism;Metabolism	Global and overview maps;Global and overview maps;Global and overview maps;Global and overview maps;Global and overview maps;Global and overview maps;Carbohydrate metabolism;Carbohydrate metabolism;Global and overview maps	ko01100//Metabolic pathways;ko01110//Biosynthesis of secondary metabolites;ko01130//Biosynthesis of antibiotics;ko01120//Microbial metabolism in diverse environments;ko01200//Carbon metabolism;ko01230//Biosynthesis of amino acids;ko00020//Citrate cycle (TCA cycle);ko00630//Glyoxylate and dicarboxylate metabolism;ko01210//2-Oxocarboxylic acid metabolism	K01681;K01681;K01681;K01681;K01681;K01681;K01681;K01681;K01681	-	-	-
MSTRG.19042.1	NW_011952114.1	589365	591822	-	ncbi_105384632	601251	608427	-	DOWNSTREAM	9428	LOC105384632	uncharacterized LOC105384632	Metabolism	Metabolism of cofactors and vitamins	ko00770//Pantothenate and CoA biosynthesis	K08069	-	-	-
MSTRG.19081.1	NW_011952114.1	837745	848244	-	ncbi_105384634	856104	896568	+	UPSTREAM	7859	LOC105384634	mitogen-activated protein kinase kinase kinase 10-like	-	-	-	-	-	-	-
MSTRG.19111.1	NW_011952115.1	159209	161023	-	ncbi_105384641	165128	166380	+	UPSTREAM	4104	LOC105384641	UPF0693 protein C10orf32 homolog	-	-	-	-	-	-	-
MSTRG.19111.1	NW_011952115.1	159209	161023	-	ncbi_105384676	131706	159117	+	DOWNSTREAM	91	LOC105384676	ubiquitin carboxyl-terminal hydrolase 20	-	-	-	-	-	-	-
XR_960626.1	NW_011952116.1	353171	354307	+	ncbi_105384715	356066	359648	-	DOWNSTREAM	1758	LOC105384715	kelch-like protein 10	-	-	-	-	-	-	-
XR_960626.1	NW_011952116.1	353171	354307	+	ncbi_105384700	363742	384894	-	DOWNSTREAM	9434	LOC105384700	alpha-aminoadipic semialdehyde synthase	Metabolism;Metabolism;Metabolism;Metabolism	Global and overview maps;Global and overview maps;Global and overview maps;Amino acid metabolism	ko01100//Metabolic pathways;ko01110//Biosynthesis of secondary metabolites;ko01130//Biosynthesis of antibiotics;ko00310//Lysine degradation	K14157;K14157;K14157;K14157	-	-	GO:0044710//single-organism metabolic process
MSTRG.19284.1	NW_011952116.1	451857	453714	-	ncbi_105384707	432799	449906	+	DOWNSTREAM	1950	LOC105384707	chitooligosaccharidolytic beta-N-acetylglucosaminidase	Metabolism;Cellular Processes;Metabolism;Metabolism;Metabolism;Metabolism;Metabolism	Global and overview maps;Transport and catabolism;Carbohydrate metabolism;Glycan biosynthesis and metabolism;Glycan biosynthesis and metabolism;Glycan biosynthesis and metabolism;Glycan biosynthesis and metabolism	ko01100//Metabolic pathways;ko04142//Lysosome;ko00520//Amino sugar and nucleotide sugar metabolism;ko00511//Other glycan degradation;ko00531//Glycosaminoglycan degradation;ko00603//Glycosphingolipid biosynthesis - globo and isoglobo series;ko00604//Glycosphingolipid biosynthesis - ganglio series	K12373;K12373;K12373;K12373;K12373;K12373;K12373	-	GO:0015929//hexosaminidase activity	GO:0044238//primary metabolic process
MSTRG.19284.1	NW_011952116.1	451857	453714	-	ncbi_105384717	457290	464095	+	UPSTREAM	3575	LOC105384717	chitooligosaccharidolytic beta-N-acetylglucosaminidase-like	Metabolism;Cellular Processes;Metabolism;Metabolism;Metabolism;Metabolism;Metabolism	Global and overview maps;Transport and catabolism;Carbohydrate metabolism;Glycan biosynthesis and metabolism;Glycan biosynthesis and metabolism;Glycan biosynthesis and metabolism;Glycan biosynthesis and metabolism	ko01100//Metabolic pathways;ko04142//Lysosome;ko00520//Amino sugar and nucleotide sugar metabolism;ko00511//Other glycan degradation;ko00531//Glycosaminoglycan degradation;ko00603//Glycosphingolipid biosynthesis - globo and isoglobo series;ko00604//Glycosphingolipid biosynthesis - ganglio series	K12373;K12373;K12373;K12373;K12373;K12373;K12373	-	GO:0016798//hydrolase activity, acting on glycosyl bonds	GO:0008152//metabolic process
MSTRG.19285.1	NW_011952116.1	452500	454593	-	ncbi_105384707	432799	449906	+	DOWNSTREAM	2593	LOC105384707	chitooligosaccharidolytic beta-N-acetylglucosaminidase	Metabolism;Cellular Processes;Metabolism;Metabolism;Metabolism;Metabolism;Metabolism	Global and overview maps;Transport and catabolism;Carbohydrate metabolism;Glycan biosynthesis and metabolism;Glycan biosynthesis and metabolism;Glycan biosynthesis and metabolism;Glycan biosynthesis and metabolism	ko01100//Metabolic pathways;ko04142//Lysosome;ko00520//Amino sugar and nucleotide sugar metabolism;ko00511//Other glycan degradation;ko00531//Glycosaminoglycan degradation;ko00603//Glycosphingolipid biosynthesis - globo and isoglobo series;ko00604//Glycosphingolipid biosynthesis - ganglio series	K12373;K12373;K12373;K12373;K12373;K12373;K12373	-	GO:0015929//hexosaminidase activity	GO:0044238//primary metabolic process
MSTRG.19285.1	NW_011952116.1	452500	454593	-	ncbi_105384717	457290	464095	+	UPSTREAM	2696	LOC105384717	chitooligosaccharidolytic beta-N-acetylglucosaminidase-like	Metabolism;Cellular Processes;Metabolism;Metabolism;Metabolism;Metabolism;Metabolism	Global and overview maps;Transport and catabolism;Carbohydrate metabolism;Glycan biosynthesis and metabolism;Glycan biosynthesis and metabolism;Glycan biosynthesis and metabolism;Glycan biosynthesis and metabolism	ko01100//Metabolic pathways;ko04142//Lysosome;ko00520//Amino sugar and nucleotide sugar metabolism;ko00511//Other glycan degradation;ko00531//Glycosaminoglycan degradation;ko00603//Glycosphingolipid biosynthesis - globo and isoglobo series;ko00604//Glycosphingolipid biosynthesis - ganglio series	K12373;K12373;K12373;K12373;K12373;K12373;K12373	-	GO:0016798//hydrolase activity, acting on glycosyl bonds	GO:0008152//metabolic process
MSTRG.19313.1	NW_011952116.1	832578	833643	+	ncbi_105384718	826106	827056	-	UPSTREAM	5521	LOC105384718	uncharacterized LOC105384718	-	-	-	-	-	-	-
MSTRG.19332.2	NW_011952117.1	60513	61653	-	ncbi_105384749	47811	51014	-	UPSTREAM	9498	LOC105384749	uncharacterized LOC105384749	-	-	-	-	-	-	-
MSTRG.19369.1	NW_011952117.1	457973	458900	-	ncbi_105384755	448437	457723	+	DOWNSTREAM	249	LOC105384755	PIH1 domain-containing protein 1-like	-	-	-	-	-	-	-
MSTRG.19421.1	NW_011952117.1	768060	769517	-	ncbi_105384764	770398	782785	-	DOWNSTREAM	880	LOC105384764	protein TESPA1-like	-	-	-	-	-	-	-
MSTRG.19460.1	NW_011952118.1	94526	99086	+	ncbi_105384788	85948	89884	+	DOWNSTREAM	4641	LOC105384788	disks large-associated protein 5	-	-	-	-	-	-	-
MSTRG.19460.1	NW_011952118.1	94526	99086	+	ncbi_105384773	80525	85762	-	UPSTREAM	8763	LOC105384773	diphosphoinositol polyphosphate phosphohydrolase 2-like	-	-	-	-	-	GO:0003824//catalytic activity	-
MSTRG.19460.1	NW_011952118.1	94526	99086	+	ncbi_105384789	105796	115541	+	UPSTREAM	6709	LOC105384789	uncharacterized LOC105384789	-	-	-	-	-	-	-
MSTRG.19601.1	NW_011952119.1	339051	349534	-	ncbi_105384813	351841	353731	-	DOWNSTREAM	2306	LOC105384813	uncharacterized LOC105384813	-	-	-	-	-	-	-
MSTRG.19616.1	NW_011952119.1	462175	466112	+	MSTRG.19614	449288	455554	+	DOWNSTREAM	6620	--	endonuclease-reverse transcriptase [Danaus plexippus]	Human Diseases	Neurodegenerative diseases	ko05010//Alzheimer disease	K01408	-	-	-
MSTRG.19678.1	NW_011952119.1	915268	915769	+	ncbi_105384832	904926	907070	+	DOWNSTREAM	8197	LOC105384832	heme oxygenase 1-like	Metabolism;Metabolism;Metabolism	Global and overview maps;Global and overview maps;Metabolism of cofactors and vitamins	ko01100//Metabolic pathways;ko01110//Biosynthesis of secondary metabolites;ko00860//Porphyrin and chlorophyll metabolism	K00510;K00510;K00510	-	-	GO:0055114//oxidation-reduction process
MSTRG.19722.1	NW_011952120.1	448357	474242	+	ncbi_105384855	481201	553496	+	UPSTREAM	6958	LOC105384855	hemicentin-2-like	-	-	-	-	-	-	-
MSTRG.19776.1	NW_011952121.1	174325	176913	+	ncbi_105384863	160860	166128	-	UPSTREAM	8196	LOC105384863	DAZ-associated protein 2-like	-	-	-	-	-	-	-
MSTRG.19853.1	NW_011952121.1	821319	833312	+	MSTRG.19850	817687	820892	+	DOWNSTREAM	426	LAMA1	PREDICTED: laminin subunit alpha [Papilio polytes]	Metabolism;Environmental Information Processing;Environmental Information Processing;Cellular Processes;Human Diseases;Human Diseases;Human Diseases;Human Diseases;Human Diseases	Global and overview maps;Signaling molecules and interaction;Signal transduction;Cellular community - eukaryotes;Infectious diseases;Cancers;Infectious diseases;Cancers;Infectious diseases	ko01100//Metabolic pathways;ko04512//ECM-receptor interaction;ko04151//PI3K-Akt signaling pathway;ko04510//Focal adhesion;ko05165//Human papillomavirus infection;ko05200//Pathways in cancer;ko05146//Amoebiasis;ko05222//Small cell lung cancer;ko05145//Toxoplasmosis	K06240;K06240;K06240;K06240;K06240;K06240;K06240;K06240;K06240	-	-	-
MSTRG.19853.1	NW_011952121.1	821319	833312	+	MSTRG.19851	818279	820894	-	UPSTREAM	424	LAMA1	PREDICTED: laminin subunit alpha [Papilio polytes]	Metabolism;Environmental Information Processing;Environmental Information Processing;Cellular Processes;Human Diseases;Human Diseases;Human Diseases;Human Diseases;Human Diseases	Global and overview maps;Signaling molecules and interaction;Signal transduction;Cellular community - eukaryotes;Infectious diseases;Cancers;Infectious diseases;Cancers;Infectious diseases	ko01100//Metabolic pathways;ko04512//ECM-receptor interaction;ko04151//PI3K-Akt signaling pathway;ko04510//Focal adhesion;ko05165//Human papillomavirus infection;ko05200//Pathways in cancer;ko05146//Amoebiasis;ko05222//Small cell lung cancer;ko05145//Toxoplasmosis	K06240;K06240;K06240;K06240;K06240;K06240;K06240;K06240;K06240	-	-	-
MSTRG.19855.1	NW_011952121.1	835156	838346	+	MSTRG.19856	843650	857125	-	DOWNSTREAM	5303	LanA	Laminin subunit alpha [Papilio xuthus]	Metabolism;Environmental Information Processing;Environmental Information Processing;Cellular Processes;Human Diseases;Human Diseases;Human Diseases;Human Diseases;Human Diseases	Global and overview maps;Signaling molecules and interaction;Signal transduction;Cellular community - eukaryotes;Infectious diseases;Cancers;Infectious diseases;Cancers;Infectious diseases	ko01100//Metabolic pathways;ko04512//ECM-receptor interaction;ko04151//PI3K-Akt signaling pathway;ko04510//Focal adhesion;ko05165//Human papillomavirus infection;ko05200//Pathways in cancer;ko05146//Amoebiasis;ko05222//Small cell lung cancer;ko05145//Toxoplasmosis	K06240;K06240;K06240;K06240;K06240;K06240;K06240;K06240;K06240	-	-	-
MSTRG.19857.1	NW_011952121.1	843663	857113	+	MSTRG.19852	821319	838357	-	UPSTREAM	5305	LanA	PREDICTED: laminin subunit alpha [Papilio machaon]	Metabolism;Environmental Information Processing;Environmental Information Processing;Cellular Processes;Human Diseases;Human Diseases;Human Diseases;Human Diseases;Human Diseases	Global and overview maps;Signaling molecules and interaction;Signal transduction;Cellular community - eukaryotes;Infectious diseases;Cancers;Infectious diseases;Cancers;Infectious diseases	ko01100//Metabolic pathways;ko04512//ECM-receptor interaction;ko04151//PI3K-Akt signaling pathway;ko04510//Focal adhesion;ko05165//Human papillomavirus infection;ko05200//Pathways in cancer;ko05146//Amoebiasis;ko05222//Small cell lung cancer;ko05145//Toxoplasmosis	K06240;K06240;K06240;K06240;K06240;K06240;K06240;K06240;K06240	-	-	-
MSTRG.19857.1	NW_011952121.1	843663	857113	+	MSTRG.19858	858811	868916	-	DOWNSTREAM	1697	LanA	PREDICTED: laminin subunit alpha-like, partial [Plutella xylostella]	Metabolism;Environmental Information Processing;Environmental Information Processing;Cellular Processes;Human Diseases;Human Diseases;Human Diseases;Human Diseases;Human Diseases	Global and overview maps;Signaling molecules and interaction;Signal transduction;Cellular community - eukaryotes;Infectious diseases;Cancers;Infectious diseases;Cancers;Infectious diseases	ko01100//Metabolic pathways;ko04512//ECM-receptor interaction;ko04151//PI3K-Akt signaling pathway;ko04510//Focal adhesion;ko05165//Human papillomavirus infection;ko05200//Pathways in cancer;ko05146//Amoebiasis;ko05222//Small cell lung cancer;ko05145//Toxoplasmosis	K06240;K06240;K06240;K06240;K06240;K06240;K06240;K06240;K06240	-	-	-
MSTRG.19861.1	NW_011952121.1	864066	868160	+	MSTRG.19862	869204	871685	-	DOWNSTREAM	1043	LanA	PREDICTED: laminin subunit alpha-like, partial [Plutella xylostella]	Metabolism;Environmental Information Processing;Environmental Information Processing;Cellular Processes;Human Diseases;Human Diseases;Human Diseases;Human Diseases;Human Diseases	Global and overview maps;Signaling molecules and interaction;Signal transduction;Cellular community - eukaryotes;Infectious diseases;Cancers;Infectious diseases;Cancers;Infectious diseases	ko01100//Metabolic pathways;ko04512//ECM-receptor interaction;ko04151//PI3K-Akt signaling pathway;ko04510//Focal adhesion;ko05165//Human papillomavirus infection;ko05200//Pathways in cancer;ko05146//Amoebiasis;ko05222//Small cell lung cancer;ko05145//Toxoplasmosis	K06240;K06240;K06240;K06240;K06240;K06240;K06240;K06240;K06240	-	-	-
MSTRG.19861.1	NW_011952121.1	864066	868160	+	MSTRG.19863	872407	879366	-	DOWNSTREAM	4246	LanA	PREDICTED: laminin subunit alpha-like, partial [Plutella xylostella]	Metabolism;Environmental Information Processing;Environmental Information Processing;Cellular Processes;Human Diseases;Human Diseases;Human Diseases;Human Diseases;Human Diseases	Global and overview maps;Signaling molecules and interaction;Signal transduction;Cellular community - eukaryotes;Infectious diseases;Cancers;Infectious diseases;Cancers;Infectious diseases	ko01100//Metabolic pathways;ko04512//ECM-receptor interaction;ko04151//PI3K-Akt signaling pathway;ko04510//Focal adhesion;ko05165//Human papillomavirus infection;ko05200//Pathways in cancer;ko05146//Amoebiasis;ko05222//Small cell lung cancer;ko05145//Toxoplasmosis	K06240;K06240;K06240;K06240;K06240;K06240;K06240;K06240;K06240	-	-	-
MSTRG.19861.1	NW_011952121.1	864066	868160	+	MSTRG.19856	843650	857125	-	UPSTREAM	6940	LanA	Laminin subunit alpha [Papilio xuthus]	Metabolism;Environmental Information Processing;Environmental Information Processing;Cellular Processes;Human Diseases;Human Diseases;Human Diseases;Human Diseases;Human Diseases	Global and overview maps;Signaling molecules and interaction;Signal transduction;Cellular community - eukaryotes;Infectious diseases;Cancers;Infectious diseases;Cancers;Infectious diseases	ko01100//Metabolic pathways;ko04512//ECM-receptor interaction;ko04151//PI3K-Akt signaling pathway;ko04510//Focal adhesion;ko05165//Human papillomavirus infection;ko05200//Pathways in cancer;ko05146//Amoebiasis;ko05222//Small cell lung cancer;ko05145//Toxoplasmosis	K06240;K06240;K06240;K06240;K06240;K06240;K06240;K06240;K06240	-	-	-
MSTRG.19890.1	NW_011952122.1	212102	214442	+	MSTRG.19888	206339	210744	+	DOWNSTREAM	1357	--	reverse transcriptase [Operophtera brumata]	Human Diseases;Organismal Systems	Cancers;Environmental adaptation	ko05225//Hepatocellular carcinoma;ko04714//Thermogenesis	K11652;K11652	-	-	-
MSTRG.20024.1	NW_011952123.1	404916	406831	-	MSTRG.20026	411457	413326	+	UPSTREAM	4625	--	PREDICTED: larval cuticle protein LCP-17-like [Plutella xylostella]	-	-	-	-	-	-	-
MSTRG.20027.1	NW_011952123.1	411483	413024	-	ncbi_105384940	418594	419761	+	UPSTREAM	5569	LOC105384940	endocuticle structural glycoprotein SgAbd-5-like	-	-	-	-	-	-	-
MSTRG.20039.1	NW_011952123.1	541889	542268	+	ncbi_105384943	539391	540899	+	DOWNSTREAM	989	LOC105384943	uncharacterized LOC105384943	-	-	-	-	-	-	-
MSTRG.20039.2	NW_011952123.1	541889	542268	+	ncbi_105384943	539391	540899	+	DOWNSTREAM	989	LOC105384943	uncharacterized LOC105384943	-	-	-	-	-	-	-
MSTRG.20048.1	NW_011952123.1	563211	598131	+	ncbi_105384966	553913	558214	+	DOWNSTREAM	4996	LOC105384966	vesicle transport through interaction with t-SNAREs homolog 1A-like	Genetic Information Processing	Folding, sorting and degradation	ko04130//SNARE interactions in vesicular transport	K08493	-	-	GO:0006810//transport
XR_960636.1	NW_011952124.1	666199	666707	+	ncbi_105384991	642612	660841	-	UPSTREAM	5357	LOC105384991	uncharacterized LOC105384991	-	-	-	-	-	-	-
MSTRG.20216.1	NW_011952125.1	193421	200395	+	ncbi_105385039	201903	203652	+	UPSTREAM	1507	LOC105385039	uncharacterized LOC105385039	-	-	-	-	-	-	-
MSTRG.20365.1	NW_011952126.1	414355	415539	+	ncbi_105385079	408992	411741	+	DOWNSTREAM	2613	LOC105385079	uncharacterized protein C6orf106 homolog	-	-	-	-	-	-	-
MSTRG.20657.1	NW_011952129.1	182944	185059	+	ncbi_105385188	169654	177964	-	UPSTREAM	4979	LOC105385188	ankyrin repeat domain-containing protein 24-like	-	-	-	-	-	-	-
MSTRG.20727.1	NW_011952130.1	129571	130750	+	ncbi_105385228	131206	132728	+	UPSTREAM	455	LOC105385228	uncharacterized LOC105385228	-	-	-	-	-	-	-
MSTRG.20727.1	NW_011952130.1	129571	130750	+	ncbi_105385260	132801	146246	-	DOWNSTREAM	2050	LOC105385260	uncharacterized LOC105385260	-	-	-	-	-	-	-
MSTRG.20789.1	NW_011952130.1	649893	651311	+	ncbi_105385245	653096	660125	+	UPSTREAM	1784	LOC105385245	ankyrin repeat	-	-	-	-	-	-	-
MSTRG.20825.1	NW_011952130.1	815861	816918	+	ncbi_105385258	817545	822458	+	UPSTREAM	626	LOC105385258	probable 4-coumarate--CoA ligase 3	-	-	-	-	-	-	-
MSTRG.20829.1	NW_011952130.1	832433	833247	-	ncbi_105385258	817545	822458	+	DOWNSTREAM	9974	LOC105385258	probable 4-coumarate--CoA ligase 3	-	-	-	-	-	-	-
MSTRG.20829.1	NW_011952130.1	832433	833247	-	ncbi_105385269	841860	867276	-	DOWNSTREAM	8612	LOC105385269	serine/arginine repetitive matrix protein 2-like	-	-	-	-	-	-	-
MSTRG.20830.1	NW_011952130.1	832451	833227	+	ncbi_105385258	817545	822458	+	DOWNSTREAM	9992	LOC105385258	probable 4-coumarate--CoA ligase 3	-	-	-	-	-	-	-
MSTRG.20830.1	NW_011952130.1	832451	833227	+	ncbi_105385269	841860	867276	-	DOWNSTREAM	8632	LOC105385269	serine/arginine repetitive matrix protein 2-like	-	-	-	-	-	-	-
MSTRG.20831.1	NW_011952130.1	834033	838118	-	ncbi_105385269	841860	867276	-	DOWNSTREAM	3741	LOC105385269	serine/arginine repetitive matrix protein 2-like	-	-	-	-	-	-	-
MSTRG.20873.1	NW_011952131.1	284297	293158	-	ncbi_105385309	294109	329784	-	DOWNSTREAM	950	LOC105385309	BTB/POZ domain-containing protein 7	-	-	-	-	-	-	-
MSTRG.21015.1	NW_011952132.1	688967	719542	+	MSTRG.21014	685861	688771	+	DOWNSTREAM	195	--	PREDICTED: uncharacterized protein LOC105385439 [Plutella xylostella]	-	-	-	-	-	-	-
MSTRG.21093.1	NW_011952133.1	380160	382069	-	ncbi_105385378	389684	422620	+	UPSTREAM	7614	LOC105385378	uncharacterized LOC105385378	-	-	-	-	-	-	-
MSTRG.21153.1	NW_011952134.1	62194	63288	+	ncbi_105385428	70435	71856	+	UPSTREAM	7146	LOC105385428	COUP transcription factor 2-like	-	-	-	-	GO:0043231//intracellular membrane-bounded organelle	GO:0000981//RNA polymerase II transcription factor activity, sequence-specific DNA binding;GO:0038023//signaling receptor activity	GO:0009755//hormone-mediated signaling pathway;GO:0010468//regulation of gene expression;GO:0034645//cellular macromolecule biosynthetic process
MSTRG.21270.1	NW_011952135.1	423789	424904	-	ncbi_105385458	426964	501702	-	DOWNSTREAM	2059	LOC105385458	uncharacterized LOC105385458	-	-	-	-	-	-	-
MSTRG.21279.1	NW_011952135.1	569373	569831	-	ncbi_105385460	574360	576122	+	UPSTREAM	4528	LOC105385460	NF-kappa-B-activating protein-like	-	-	-	-	-	-	-
MSTRG.21280.1	NW_011952135.1	574011	613271	+	ncbi_105385459	563064	573798	-	UPSTREAM	212	LOC105385459	uncharacterized LOC105385459	-	-	-	-	-	-	-
MSTRG.21318.1	NW_011952135.1	765517	767419	+	ncbi_105385449	760077	765041	+	DOWNSTREAM	475	LOC105385449	dnaJ homolog subfamily C member 22	-	-	-	-	-	-	-
MSTRG.21378.1	NW_011952136.1	483045	484097	-	ncbi_105385485	476869	480428	-	UPSTREAM	2616	LOC105385485	lipase 3	-	-	-	-	-	-	-
MSTRG.21382.1	NW_011952136.1	571079	572235	+	ncbi_105385487	580591	583231	+	UPSTREAM	8355	LOC105385487	fibroin heavy chain-like	Genetic Information Processing	Transcription	ko03040//Spliceosome	K12813	-	-	-
MSTRG.21382.1	NW_011952136.1	571079	572235	+	ncbi_105385486	423452	570355	+	DOWNSTREAM	723	LOC105385486	syndecan	-	-	-	-	-	-	-
MSTRG.21430.2	NW_011952137.1	300333	302119	+	ncbi_105385503	281668	299513	+	DOWNSTREAM	819	LOC105385503	membrane-associated guanylate kinase	-	-	-	-	-	-	-
MSTRG.21430.2	NW_011952137.1	300333	302119	+	ncbi_105385519	303120	375791	+	UPSTREAM	1000	LOC105385519	inositol 1	Environmental Information Processing;Organismal Systems	Signal transduction;Sensory system	ko04070//Phosphatidylinositol signaling system;ko04745//Phototransduction - fly	K04958;K04958	-	-	-
XR_960659.1	NW_011952137.1	736869	737945	+	ncbi_105385529	729046	730785	-	UPSTREAM	6083	LOC105385529	uncharacterized LOC105385529	-	-	-	-	-	-	-
MSTRG.21489.1	NW_011952137.1	746049	749786	-	ncbi_105385530	751392	757842	+	UPSTREAM	1605	LOC105385530	structural maintenance of chromosomes protein 5-like	-	-	-	-	-	-	-
MSTRG.21629.1	NW_011952138.1	738460	739459	+	ncbi_105385561	742037	746195	-	DOWNSTREAM	2577	LOC105385561	uncharacterized LOC105385561	-	-	-	-	-	-	-
MSTRG.21787.1	NW_011952140.1	473543	475437	+	ncbi_105385615	476548	481117	-	DOWNSTREAM	1110	LOC105385615	serine/threonine-protein kinase RIO2	Genetic Information Processing	Translation	ko03008//Ribosome biogenesis in eukaryotes	K07179	-	GO:0016772//transferase activity, transferring phosphorus-containing groups	-
MSTRG.21809.2	NW_011952140.1	603269	604842	-	ncbi_105385633	611235	621655	-	DOWNSTREAM	6392	LOC105385633	uncharacterized LOC105385633	-	-	-	-	-	-	-
MSTRG.21843.2	NW_011952141.1	41683	42710	-	MSTRG.21845	44909	46661	+	UPSTREAM	2198	--	PREDICTED: LOW QUALITY PROTEIN: protein tramtrack, alpha isoform-like [Plutella xylostella]	-	-	-	-	-	-	-
MSTRG.21843.2	NW_011952141.1	41683	42710	-	ncbi_105385664	22351	41343	+	DOWNSTREAM	339	LOC105385664	rho GTPase-activating protein 39	-	-	-	-	-	-	-
MSTRG.21962.1	NW_011952142.1	188608	212519	+	ncbi_105385687	212886	214957	-	DOWNSTREAM	366	LOC105385687	uncharacterized LOC105385687	-	-	-	-	-	-	-
MSTRG.21963.1	NW_011952142.1	188608	212519	-	ncbi_105385687	212886	214957	-	DOWNSTREAM	366	LOC105385687	uncharacterized LOC105385687	-	-	-	-	-	-	-
MSTRG.22044.2	NW_011952143.1	162562	165779	-	ncbi_105385721	134623	158335	-	UPSTREAM	4226	LOC105385721	uncharacterized LOC105385721	-	-	-	-	-	-	-
MSTRG.22044.2	NW_011952143.1	162562	165779	-	ncbi_105385722	165838	185063	-	DOWNSTREAM	58	LOC105385722	phosphatidate cytidylyltransferase	Metabolism;Metabolism;Environmental Information Processing;Metabolism	Global and overview maps;Global and overview maps;Signal transduction;Lipid metabolism	ko01100//Metabolic pathways;ko01110//Biosynthesis of secondary metabolites;ko04070//Phosphatidylinositol signaling system;ko00564//Glycerophospholipid metabolism	K00981;K00981;K00981;K00981	-	-	-
MSTRG.22100.1	NW_011952143.1	584120	585583	-	ncbi_105385739	591682	595088	+	UPSTREAM	6098	LOC105385739	zinc carboxypeptidase-like	-	-	-	-	-	-	-
MSTRG.22100.1	NW_011952143.1	584120	585583	-	ncbi_105385738	587012	590156	-	DOWNSTREAM	1428	LOC105385738	carboxypeptidase B-like	-	-	-	-	-	-	-
MSTRG.22110.1	NW_011952143.1	604812	606018	+	ncbi_105385739	591682	595088	+	DOWNSTREAM	9723	LOC105385739	zinc carboxypeptidase-like	-	-	-	-	-	-	-
MSTRG.22110.1	NW_011952143.1	604812	606018	+	ncbi_105385740	596029	599057	+	DOWNSTREAM	5754	LOC105385740	zinc carboxypeptidase-like	-	-	-	-	-	-	-
MSTRG.22110.1	NW_011952143.1	604812	606018	+	ncbi_105385741	609246	613076	+	UPSTREAM	3227	LOC105385741	carboxypeptidase B-like	-	-	-	-	-	-	-
MSTRG.22113.1	NW_011952143.1	622357	626451	-	ncbi_105385741	609246	613076	+	DOWNSTREAM	9280	LOC105385741	carboxypeptidase B-like	-	-	-	-	-	-	-
MSTRG.22113.2	NW_011952143.1	622359	626448	-	ncbi_105385741	609246	613076	+	DOWNSTREAM	9282	LOC105385741	carboxypeptidase B-like	-	-	-	-	-	-	-
MSTRG.22183.1	NW_011952144.1	626023	627729	+	MSTRG.22187	637051	637882	+	UPSTREAM	9321	--	-	-	-	-	-	-	-	-
MSTRG.22297.1	NW_011952145.1	684590	686861	-	MSTRG.22294	673184	674957	+	DOWNSTREAM	9632	--	PREDICTED: RNA-directed DNA polymerase from mobile element jockey-like [Plutella xylostella]	-	-	-	-	-	-	-
MSTRG.22333.1	NW_011952146.1	48922	49864	+	ncbi_105385831	51393	55491	-	DOWNSTREAM	1528	LOC105385831	uncharacterized LOC105385831	-	-	-	-	-	-	-
MSTRG.22333.1	NW_011952146.1	48922	49864	+	ncbi_105385833	58598	64650	+	UPSTREAM	8733	LOC105385833	uncharacterized LOC105385833	-	-	-	-	-	-	-
MSTRG.22334.1	NW_011952146.1	49889	50869	-	ncbi_105385831	51393	55491	-	DOWNSTREAM	523	LOC105385831	uncharacterized LOC105385831	-	-	-	-	-	-	-
MSTRG.22334.1	NW_011952146.1	49889	50869	-	ncbi_105385833	58598	64650	+	UPSTREAM	7728	LOC105385833	uncharacterized LOC105385833	-	-	-	-	-	-	-
XR_960680.1	NW_011952149.1	668757	670377	+	ncbi_105385997	676466	701445	-	DOWNSTREAM	6088	LOC105385997	transient receptor potential cation channel subfamily V member 1-like	-	-	-	-	GO:0031224//intrinsic component of membrane	-	GO:0006811//ion transport;GO:0044763//single-organism cellular process
MSTRG.22856.1	NW_011952150.1	425060	425757	-	ncbi_105386016	416293	417309	-	UPSTREAM	7750	LOC105386016	mucin-5AC-like	-	-	-	-	-	-	-
MSTRG.22856.1	NW_011952150.1	425060	425757	-	ncbi_105386018	428715	439590	-	DOWNSTREAM	2957	LOC105386018	uncharacterized LOC105386018	-	-	-	-	-	-	-
MSTRG.22996.1	NW_011952152.1	189159	192040	+	ncbi_105386073	164113	179882	-	UPSTREAM	9276	LOC105386073	uncharacterized LOC105386073	-	-	-	-	-	-	-
MSTRG.22996.1	NW_011952152.1	189159	192040	+	ncbi_105386105	201601	208314	-	DOWNSTREAM	9560	LOC105386105	achelase-1-like	-	-	-	-	-	-	-
MSTRG.22996.1	NW_011952152.1	189159	192040	+	ncbi_105386076	196559	199522	-	DOWNSTREAM	4518	LOC105386076	uncharacterized LOC105386076	-	-	-	-	-	-	-
XR_960688.1	NW_011952153.1	239944	241655	+	ncbi_105386136	231971	233542	-	UPSTREAM	6401	LOC105386136	uncharacterized LOC105386136	-	-	-	-	-	-	-
MSTRG.23144.1	NW_011952153.1	330134	333791	+	ncbi_105386175	337218	412216	+	UPSTREAM	3426	LOC105386175	uncharacterized LOC105386175	-	-	-	-	GO:0031224//intrinsic component of membrane	GO:0001637//G-protein coupled chemoattractant receptor activity	GO:0019221//cytokine-mediated signaling pathway
MSTRG.23185.1	NW_011952153.1	557107	582459	-	ncbi_105386151	584561	603164	-	DOWNSTREAM	2101	LOC105386151	rho guanine nucleotide exchange factor 7	-	-	-	-	-	-	-
MSTRG.23185.1	NW_011952153.1	557107	582459	-	ncbi_105386179	505537	552547	-	UPSTREAM	4559	LOC105386179	uncharacterized LOC105386179	-	-	-	-	-	-	-
MSTRG.23188.1	NW_011952153.1	582697	583350	+	ncbi_105386149	557880	582543	+	DOWNSTREAM	153	LOC105386149	homocysteine S-methyltransferase 1-like	Metabolism;Metabolism;Metabolism	Global and overview maps;Global and overview maps;Amino acid metabolism	ko01100//Metabolic pathways;ko01110//Biosynthesis of secondary metabolites;ko00270//Cysteine and methionine metabolism	K00547;K00547;K00547	-	-	-
MSTRG.23188.1	NW_011952153.1	582697	583350	+	ncbi_105386151	584561	603164	-	DOWNSTREAM	1210	LOC105386151	rho guanine nucleotide exchange factor 7	-	-	-	-	-	-	-
MSTRG.23224.1	NW_011952153.1	762064	764875	+	ncbi_105386167	764969	766399	-	DOWNSTREAM	93	LOC105386167	uncharacterized LOC105386167	-	-	-	-	-	-	-
MSTRG.23290.1	NW_011952154.1	552676	554151	-	ncbi_105386194	554419	556342	+	UPSTREAM	267	LOC105386194	alpha-(1	-	-	-	-	-	-	-
MSTRG.23290.1	NW_011952154.1	552676	554151	-	ncbi_105386195	562083	568849	-	DOWNSTREAM	7931	LOC105386195	protein D2-like	-	-	-	-	-	-	-
MSTRG.23368.1	NW_011952155.1	382881	383381	-	ncbi_105386240	388553	390349	+	UPSTREAM	5171	LOC105386240	leucine-rich repeat-containing protein 71-like	-	-	-	-	-	-	-
MSTRG.23514.1	NW_011952157.1	106863	109494	+	ncbi_105386284	103029	104899	+	DOWNSTREAM	1963	LOC105386284	zinc finger protein 430	-	-	-	-	-	-	-
MSTRG.23514.1	NW_011952157.1	106863	109494	+	MSTRG.23516	111790	117596	-	DOWNSTREAM	2295	X-element\ORF2	PREDICTED: RNA-directed DNA polymerase from mobile element jockey-like, partial [Papilio machaon]	-	-	-	-	-	-	-
MSTRG.23514.1	NW_011952157.1	106863	109494	+	MSTRG.23517	112417	116090	+	UPSTREAM	2922	X-element\ORF2	PREDICTED: RNA-directed DNA polymerase from mobile element jockey-like, partial [Papilio machaon]	-	-	-	-	-	-	-
XR_960696.1	NW_011952157.1	449649	452475	-	ncbi_105386323	447874	449552	+	DOWNSTREAM	96	LOC105386323	uricase	Metabolism;Metabolism;Metabolism;Metabolism	Global and overview maps;Global and overview maps;Nucleotide metabolism;Biosynthesis of other secondary metabolites	ko01100//Metabolic pathways;ko01120//Microbial metabolism in diverse environments;ko00230//Purine metabolism;ko00232//Caffeine metabolism	K00365;K00365;K00365;K00365	GO:0042579//microbody	GO:0003824//catalytic activity	GO:0009112//nucleobase metabolic process;GO:0044282//small molecule catabolic process
XR_960697.1	NW_011952158.1	399089	452907	-	ncbi_105386339	396701	399055	-	UPSTREAM	33	LOC105386339	leucine-rich repeat neuronal protein 2-like	-	-	-	-	-	-	-
XR_960697.1	NW_011952158.1	399089	452907	-	ncbi_105386343	460435	470869	+	UPSTREAM	7527	LOC105386343	adenylate cyclase type 7-like	-	-	-	-	-	-	-
XR_960700.1	NW_011952158.1	730631	732443	-	ncbi_105386352	739381	751089	-	DOWNSTREAM	6937	LOC105386352	pyridoxal-dependent decarboxylase domain-containing protein 1	-	-	-	-	-	-	-
XR_960700.1	NW_011952158.1	730631	732443	-	ncbi_105386350	716728	723339	-	UPSTREAM	7291	LOC105386350	uncharacterized LOC105386350	-	-	-	-	-	-	-
MSTRG.23700.1	NW_011952158.1	737577	738395	-	ncbi_105386352	739381	751089	-	DOWNSTREAM	985	LOC105386352	pyridoxal-dependent decarboxylase domain-containing protein 1	-	-	-	-	-	-	-
MSTRG.23763.2	NW_011952159.1	501836	502692	-	ncbi_105386387	493409	497672	+	DOWNSTREAM	4163	LOC105386387	ras-like protein 2	-	-	-	-	-	GO:0032550//purine ribonucleoside binding	GO:0035556//intracellular signal transduction
MSTRG.23763.2	NW_011952159.1	501836	502692	-	ncbi_105386389	508160	517522	+	UPSTREAM	5467	LOC105386389	small VCP/p97-interacting protein-like	Genetic Information Processing	Folding, sorting and degradation	ko04141//Protein processing in endoplasmic reticulum	K14014	-	-	-
MSTRG.23839.1	NW_011952160.1	259817	260287	+	ncbi_105386426	260480	265485	+	UPSTREAM	192	LOC105386426	meiotic recombination protein DMC1/LIM15 homolog	-	-	-	-	GO:0043231//intracellular membrane-bounded organelle	GO:0003676//nucleic acid binding;GO:0032550//purine ribonucleoside binding;GO:0042623//ATPase activity, coupled	GO:0006259//DNA metabolic process;GO:0022402//cell cycle process
MSTRG.23877.1	NW_011952160.1	503426	503907	+	ncbi_105386455	489460	500798	-	UPSTREAM	2627	LOC105386455	F-box/LRR-repeat protein 16	-	-	-	-	-	-	-
MSTRG.23899.1	NW_011952160.1	541500	547394	-	ncbi_105386442	528265	532182	-	UPSTREAM	9317	LOC105386442	mediator of RNA polymerase II transcription subunit 15-like	-	-	-	-	-	-	-
MSTRG.24017.1	NW_011952162.1	241969	283864	+	ncbi_105386526	219488	235437	-	UPSTREAM	6531	LOC105386526	uncharacterized LOC105386526	-	-	-	-	-	-	-
MSTRG.24017.1	NW_011952162.1	241969	283864	+	ncbi_105386503	284386	295300	+	UPSTREAM	521	LOC105386503	forkhead box protein P1	-	-	-	-	-	-	-
MSTRG.24029.1	NW_011952162.1	364942	365665	+	ncbi_105386504	317898	355971	+	DOWNSTREAM	8970	LOC105386504	trehalase	Metabolism;Metabolism	Global and overview maps;Carbohydrate metabolism	ko01100//Metabolic pathways;ko00500//Starch and sucrose metabolism	K01194;K01194	-	GO:0015927//trehalase activity	GO:0005984//disaccharide metabolic process
MSTRG.24048.1	NW_011952162.1	532355	533573	+	ncbi_105386510	543103	556791	-	DOWNSTREAM	9529	LOC105386510	protein regulator of cytokinesis 1-like	-	-	-	-	-	-	-
MSTRG.24048.1	NW_011952162.1	532355	533573	+	ncbi_105386508	504203	522807	+	DOWNSTREAM	9547	LOC105386508	uncharacterized LOC105386508	-	-	-	-	-	-	-
MSTRG.24048.1	NW_011952162.1	532355	533573	+	ncbi_105386509	523227	526513	-	UPSTREAM	5841	LOC105386509	uncharacterized LOC105386509	-	-	-	-	-	-	-
MSTRG.24072.1	NW_011952162.1	672349	675381	+	ncbi_105386518	684368	692282	-	DOWNSTREAM	8986	LOC105386518	uncharacterized LOC105386518	-	-	-	-	-	-	-
MSTRG.24116.1	NW_011952163.1	236930	241706	+	ncbi_105386546	224242	230138	+	DOWNSTREAM	6791	LOC105386546	peritrophin-1	-	-	-	-	-	GO:0097367//carbohydrate derivative binding	GO:0006022//aminoglycan metabolic process
MSTRG.24163.1	NW_011952163.1	635351	641899	+	MSTRG.24164	643163	644610	+	UPSTREAM	1263	--	PREDICTED: RNA-directed DNA polymerase from mobile element jockey-like [Acropora digitifera]	-	-	-	-	-	-	-
MSTRG.24223.1	NW_011952164.1	287017	288623	-	ncbi_105386593	288924	290099	-	DOWNSTREAM	300	LOC105386593	V-type proton ATPase subunit F	Metabolism;Metabolism;Cellular Processes	Global and overview maps;Energy metabolism;Transport and catabolism	ko01100//Metabolic pathways;ko00190//Oxidative phosphorylation;ko04145//Phagosome	K02151;K02151;K02151	GO:0033180//proton-transporting V-type ATPase, V1 domain	GO:0015078//hydrogen ion transmembrane transporter activity	GO:0015988//energy coupled proton transmembrane transport, against electrochemical gradient
MSTRG.24232.7	NW_011952164.1	350497	366048	-	MSTRG.24235	370468	371227	-	DOWNSTREAM	4419	--	Transporter-like protein [Operophtera brumata]	-	-	-	-	-	-	-
MSTRG.24232.7	NW_011952164.1	350497	366048	-	ncbi_105386599	375181	376955	+	UPSTREAM	9132	LOC105386599	uncharacterized LOC105386599	-	-	-	-	-	-	-
MSTRG.24237.1	NW_011952164.1	373450	373954	+	MSTRG.24235	370468	371227	-	UPSTREAM	2222	--	Transporter-like protein [Operophtera brumata]	-	-	-	-	-	-	-
MSTRG.24237.1	NW_011952164.1	373450	373954	+	MSTRG.24240	380601	385334	-	DOWNSTREAM	6646	--	-	-	-	-	-	-	-	-
MSTRG.24237.1	NW_011952164.1	373450	373954	+	ncbi_105386599	375181	376955	+	UPSTREAM	1226	LOC105386599	uncharacterized LOC105386599	-	-	-	-	-	-	-
XR_960713.1	NW_011952164.1	603539	611116	-	ncbi_105386605	591924	596713	+	DOWNSTREAM	6825	LOC105386605	meiosis-specific nuclear structural protein 1-like	-	-	-	-	-	-	-
XR_960713.1	NW_011952164.1	603539	611116	-	ncbi_105386608	612934	615169	-	DOWNSTREAM	1817	LOC105386608	uncharacterized LOC105386608	-	-	-	-	-	-	-
XR_960713.1	NW_011952164.1	603539	611116	-	ncbi_105386613	616792	646482	+	UPSTREAM	5675	LOC105386613	neuroligin-1-like	-	-	-	-	-	-	-
MSTRG.24379.1	NW_011952165.1	575579	584621	-	ncbi_105386642	584702	586235	-	DOWNSTREAM	80	LOC105386642	uncharacterized LOC105386642	-	-	-	-	-	-	-
MSTRG.24379.1	NW_011952165.1	575579	584621	-	ncbi_105386652	586776	591517	-	DOWNSTREAM	2154	LOC105386652	uncharacterized LOC105386652	-	-	-	-	-	-	-
MSTRG.24395.1	NW_011952165.1	704481	711909	+	ncbi_105386655	712481	734864	+	UPSTREAM	571	LOC105386655	ankyrin repeat domain-containing protein 50	-	-	-	-	-	-	-
MSTRG.24487.3	NW_011952166.1	450001	451020	-	ncbi_105386688	421215	441120	-	UPSTREAM	8880	LOC105386688	multidrug resistance protein homolog 49-like	Environmental Information Processing	Membrane transport	ko02010//ABC transporters	K05658	-	-	-
MSTRG.24608.5	NW_011952168.1	176779	180410	-	ncbi_105386760	171250	172920	+	DOWNSTREAM	3858	LOC105386760	uncharacterized LOC105386760	-	-	-	-	-	-	-
MSTRG.24608.5	NW_011952168.1	176779	180410	-	ncbi_105386762	180622	184815	-	DOWNSTREAM	211	LOC105386762	guanine nucleotide-releasing factor 2-like	-	-	-	-	-	-	-
MSTRG.24626.1	NW_011952168.1	251323	251947	-	ncbi_105386735	258705	315894	-	DOWNSTREAM	6757	LOC105386735	b(0	-	-	-	-	-	-	-
MSTRG.24625.3	NW_011952168.1	256138	258695	+	ncbi_105386735	258705	315894	-	DOWNSTREAM	9	LOC105386735	b(0	-	-	-	-	-	-	-
MSTRG.24632.2	NW_011952168.1	294236	321485	-	ncbi_105386736	323827	333021	+	UPSTREAM	2341	LOC105386736	serine/threonine-protein kinase GA29083	-	-	-	-	-	-	-
MSTRG.24632.3	NW_011952168.1	294281	318418	-	ncbi_105386736	323827	333021	+	UPSTREAM	5408	LOC105386736	serine/threonine-protein kinase GA29083	-	-	-	-	-	-	-
MSTRG.24632.4	NW_011952168.1	294706	319494	-	ncbi_105386736	323827	333021	+	UPSTREAM	4332	LOC105386736	serine/threonine-protein kinase GA29083	-	-	-	-	-	-	-
MSTRG.24632.5	NW_011952168.1	294706	319494	-	ncbi_105386736	323827	333021	+	UPSTREAM	4332	LOC105386736	serine/threonine-protein kinase GA29083	-	-	-	-	-	-	-
MSTRG.24776.1	NW_011952170.1	260397	262265	+	ncbi_105386802	272198	278512	-	DOWNSTREAM	9932	LOC105386802	cilia- and flagella-associated protein 45-like	-	-	-	-	-	-	-
MSTRG.24820.2	NW_011952170.1	584187	595650	+	ncbi_105386817	573159	575718	+	DOWNSTREAM	8468	LOC105386817	proteasome subunit beta type-2-like	Genetic Information Processing	Folding, sorting and degradation	ko03050//Proteasome	K02734	-	-	-
MSTRG.24820.2	NW_011952170.1	584187	595650	+	ncbi_105386820	515616	579626	-	UPSTREAM	4560	LOC105386820	uncharacterized LOC105386820	-	-	-	-	-	-	-
MSTRG.24865.1	NW_011952171.1	140567	143259	-	ncbi_105386897	123941	132911	+	DOWNSTREAM	7655	LOC105386897	uncharacterized LOC105386897	-	-	-	-	-	-	-
MSTRG.24898.2	NW_011952171.1	396727	398684	+	ncbi_105386856	400729	410877	-	DOWNSTREAM	2044	LOC105386856	uncharacterized LOC105386856	-	-	-	-	-	-	-
MSTRG.24913.2	NW_011952171.1	461277	461687	-	ncbi_105386863	449775	452360	+	DOWNSTREAM	8916	LOC105386863	uncharacterized LOC105386863	-	-	-	-	-	-	-
MSTRG.24913.2	NW_011952171.1	461277	461687	-	ncbi_105386866	470603	477657	-	DOWNSTREAM	8915	LOC105386866	elongation of very long chain fatty acids protein AAEL008004-like	-	-	-	-	-	-	-
MSTRG.24918.1	NW_011952171.1	484783	485612	+	ncbi_105386907	481832	484284	+	DOWNSTREAM	498	LOC105386907	alpha/beta hydrolase domain-containing protein 11-like	-	-	-	-	-	-	-
MSTRG.24918.1	NW_011952171.1	484783	485612	+	ncbi_105386866	470603	477657	-	UPSTREAM	7125	LOC105386866	elongation of very long chain fatty acids protein AAEL008004-like	-	-	-	-	-	-	-
MSTRG.24918.1	NW_011952171.1	484783	485612	+	ncbi_105386870	494038	510418	+	UPSTREAM	8425	LOC105386870	phenoloxidase subunit 2-like	-	-	-	-	-	-	-
MSTRG.24925.1	NW_011952171.1	500075	512132	-	MSTRG.24929	519237	520833	-	DOWNSTREAM	7104	--	-	-	-	-	-	-	-	-
XR_960730.1	NW_011952171.1	510162	512120	-	MSTRG.24929	519237	520833	-	DOWNSTREAM	7116	--	-	-	-	-	-	-	-	-
MSTRG.24927.1	NW_011952171.1	515480	518354	+	MSTRG.24929	519237	520833	-	DOWNSTREAM	882	--	-	-	-	-	-	-	-	-
MSTRG.24927.1	NW_011952171.1	515480	518354	+	ncbi_105386870	494038	510418	+	DOWNSTREAM	5061	LOC105386870	phenoloxidase subunit 2-like	-	-	-	-	-	-	-
MSTRG.24953.2	NW_011952171.1	601835	603449	+	ncbi_105386882	604471	605786	+	UPSTREAM	1021	LOC105386882	actin-related protein 2/3 complex subunit 3	Cellular Processes	Transport and catabolism	ko04144//Endocytosis	K05756	GO:0043232//intracellular non-membrane-bounded organelle;GO:0043234//protein complex	-	GO:0045010//actin nucleation
MSTRG.24953.2	NW_011952171.1	601835	603449	+	ncbi_105386879	586974	601567	+	DOWNSTREAM	267	LOC105386879	signal peptide peptidase-like 3	-	-	-	-	GO:0031224//intrinsic component of membrane	-	GO:0019538//protein metabolic process
MSTRG.24967.1	NW_011952171.1	655618	657094	-	ncbi_105386890	637792	651878	-	UPSTREAM	3739	LOC105386890	fatty acid synthase-like	Metabolism;Metabolism;Metabolism	Global and overview maps;Global and overview maps;Lipid metabolism	ko01100//Metabolic pathways;ko01212//Fatty acid metabolism;ko00061//Fatty acid biosynthesis	K00665;K00665;K00665	-	-	-
MSTRG.24967.1	NW_011952171.1	655618	657094	-	ncbi_105386889	659495	673300	-	DOWNSTREAM	2400	LOC105386889	fatty acid synthase-like	Metabolism;Metabolism;Metabolism	Global and overview maps;Global and overview maps;Lipid metabolism	ko01100//Metabolic pathways;ko01212//Fatty acid metabolism;ko00061//Fatty acid biosynthesis	K00665;K00665;K00665	-	-	-
MSTRG.24976.1	NW_011952171.1	714066	715078	+	ncbi_105386886	696642	710187	-	UPSTREAM	3878	LOC105386886	fatty acid synthase-like	Metabolism;Metabolism;Metabolism	Global and overview maps;Global and overview maps;Lipid metabolism	ko01100//Metabolic pathways;ko01212//Fatty acid metabolism;ko00061//Fatty acid biosynthesis	K00665;K00665;K00665	-	-	-
XR_960736.1	NW_011952172.1	644197	650119	-	ncbi_105386937	637546	638448	-	UPSTREAM	5748	LOC105386937	small integral membrane protein 12-like	-	-	-	-	-	-	-
MSTRG.25084.1	NW_011952172.1	709480	710185	-	ncbi_105386963	714233	717792	+	UPSTREAM	4047	LOC105386963	pancreatic triacylglycerol lipase-like	-	-	-	-	-	-	-
MSTRG.25099.1	NW_011952173.1	84269	87665	-	ncbi_105387004	67358	81124	-	UPSTREAM	3144	LOC105387004	uncharacterized LOC105387004	-	-	-	-	-	-	-
MSTRG.25101.1	NW_011952173.1	88834	89483	-	ncbi_105387004	67358	81124	-	UPSTREAM	7709	LOC105387004	uncharacterized LOC105387004	-	-	-	-	-	-	-
MSTRG.25102.1	NW_011952173.1	88851	89618	+	ncbi_105387004	67358	81124	-	UPSTREAM	7726	LOC105387004	uncharacterized LOC105387004	-	-	-	-	-	-	-
MSTRG.25130.2	NW_011952173.1	271453	273746	-	ncbi_105386978	273892	315715	-	DOWNSTREAM	145	LOC105386978	organic cation transporter protein-like	-	-	-	-	-	-	-
MSTRG.25130.2	NW_011952173.1	271453	273746	-	ncbi_105386975	255500	267154	-	UPSTREAM	4298	LOC105386975	extensin	-	-	-	-	-	-	-
XR_960738.1	NW_011952173.1	537097	539854	-	ncbi_105386992	513535	533108	-	UPSTREAM	3988	LOC105386992	probable multidrug resistance-associated protein lethal(2)03659	Environmental Information Processing	Membrane transport	ko02010//ABC transporters	K05673	-	-	-
MSTRG.25211.2	NW_011952174.1	103969	104725	-	ncbi_105387015	108019	117908	-	DOWNSTREAM	3293	LOC105387015	clavesin-2-like	-	-	-	-	-	-	-
MSTRG.25215.1	NW_011952174.1	116246	148380	+	ncbi_105387017	149471	150037	+	UPSTREAM	1090	LOC105387017	DNA-directed RNA polymerase II subunit RPB9-like	Metabolism;Metabolism;Metabolism;Genetic Information Processing	Global and overview maps;Nucleotide metabolism;Nucleotide metabolism;Transcription	ko01100//Metabolic pathways;ko00230//Purine metabolism;ko00240//Pyrimidine metabolism;ko03020//RNA polymerase	K03017;K03017;K03017;K03017	GO:0044451//nucleoplasm part	GO:0003676//nucleic acid binding;GO:0034062//RNA polymerase activity;GO:0046914//transition metal ion binding	GO:0000280//nuclear division;GO:0006351//transcription, DNA-templated;GO:0030154//cell differentiation;GO:0031572//G2 DNA damage checkpoint
MSTRG.25215.1	NW_011952174.1	116246	148380	+	ncbi_105387038	153176	179114	-	DOWNSTREAM	4795	LOC105387038	probable pathogenesis-related protein CaO19.6200	-	-	-	-	-	-	-
MSTRG.25231.1	NW_011952174.1	199859	206092	+	ncbi_105387023	188806	195031	-	UPSTREAM	4827	LOC105387023	folylpolyglutamate synthase	Metabolism;Metabolism	Global and overview maps;Metabolism of cofactors and vitamins	ko01100//Metabolic pathways;ko00790//Folate biosynthesis	K01930;K01930	-	-	-
MSTRG.25231.1	NW_011952174.1	199859	206092	+	ncbi_105387022	189681	191547	+	DOWNSTREAM	8311	LOC105387022	putative RNA polymerase II subunit B1 CTD phosphatase RPAP2	-	-	-	-	-	-	-
MSTRG.25231.1	NW_011952174.1	199859	206092	+	ncbi_105387024	208041	219474	-	DOWNSTREAM	1948	LOC105387024	heat shock 70 kDa protein cognate 3	Metabolism;Metabolism;Metabolism;Metabolism	Global and overview maps;Global and overview maps;Global and overview maps;Metabolism of cofactors and vitamins	ko01100//Metabolic pathways;ko01110//Biosynthesis of secondary metabolites;ko01120//Microbial metabolism in diverse environments;ko00860//Porphyrin and chlorophyll metabolism	K01698;K01698;K01698;K01698	-	-	-
MSTRG.25433.2	NW_011952176.1	373093	373930	+	ncbi_105387101	337780	372526	+	DOWNSTREAM	566	LOC105387101	polyhomeotic-proximal chromatin protein-like	-	-	-	-	-	-	-
MSTRG.25567.2	NW_011952177.1	531171	531636	-	ncbi_105387124	520993	523451	+	DOWNSTREAM	7719	LOC105387124	uncharacterized LOC105387124	Environmental Information Processing	Signal transduction	ko04068//FoxO signaling pathway	K05868	-	-	-
MSTRG.25613.1	NW_011952178.1	225128	225549	-	ncbi_105387168	223043	224847	-	UPSTREAM	280	LOC105387168	exosome complex component RRP43-like	Genetic Information Processing	Folding, sorting and degradation	ko03018//RNA degradation	K12586	-	-	-
MSTRG.25687.1	NW_011952179.1	109592	110965	-	ncbi_105387177	101827	107393	-	UPSTREAM	2198	LOC105387177	peritrophin-1-like	-	-	-	-	-	-	-
MSTRG.25713.1	NW_011952179.1	228282	228515	+	ncbi_105387182	236341	242125	-	DOWNSTREAM	7825	LOC105387182	heparin sulfate O-sulfotransferase	Metabolism	Glycan biosynthesis and metabolism	ko00534//Glycosaminoglycan biosynthesis - heparan sulfate / heparin	K02513	-	-	-
MSTRG.25720.1	NW_011952179.1	251976	252897	+	ncbi_105387182	236341	242125	-	UPSTREAM	9850	LOC105387182	heparin sulfate O-sulfotransferase	Metabolism	Glycan biosynthesis and metabolism	ko00534//Glycosaminoglycan biosynthesis - heparan sulfate / heparin	K02513	-	-	-
MSTRG.25962.1	NW_011952181.1	462176	469795	-	ncbi_105387242	436810	453896	-	UPSTREAM	8279	LOC105387242	xenotropic and polytropic retrovirus receptor 1-like	-	-	-	-	-	-	-
MSTRG.25992.1	NW_011952182.1	22358	23731	-	ncbi_105387275	9931	17555	-	UPSTREAM	4802	LOC105387275	alanine--tRNA ligase	Genetic Information Processing	Translation	ko00970//Aminoacyl-tRNA biosynthesis	K01872	-	-	-
MSTRG.25993.1	NW_011952182.1	23907	28342	-	ncbi_105387275	9931	17555	-	UPSTREAM	6351	LOC105387275	alanine--tRNA ligase	Genetic Information Processing	Translation	ko00970//Aminoacyl-tRNA biosynthesis	K01872	-	-	-
MSTRG.26061.1	NW_011952183.1	32697	48026	-	ncbi_105387304	52728	83826	+	UPSTREAM	4701	LOC105387304	ATPase family AAA domain-containing protein 2-like	-	-	-	-	-	-	-
MSTRG.26111.1	NW_011952183.1	643091	644262	-	ncbi_105387302	637074	638397	+	DOWNSTREAM	4693	LOC105387302	39S ribosomal protein L13	Genetic Information Processing	Translation	ko03010//Ribosome	K02871	GO:0030529//intracellular ribonucleoprotein complex	-	GO:0010467//gene expression
MSTRG.26111.1	NW_011952183.1	643091	644262	-	ncbi_105387303	638596	639290	-	UPSTREAM	3800	LOC105387303	uncharacterized LOC105387303	-	-	-	-	-	-	-
MSTRG.26195.2	NW_011952184.1	532013	540635	+	ncbi_105387347	513244	522015	+	DOWNSTREAM	9997	LOC105387347	uncharacterized LOC105387347	-	-	-	-	-	-	-
MSTRG.26206.1	NW_011952184.1	605512	614353	+	ncbi_105387351	582107	605405	-	UPSTREAM	106	LOC105387351	uncharacterized LOC105387351	-	-	-	-	-	-	-
MSTRG.26237.7	NW_011952185.1	128593	133856	-	MSTRG.26239	124344	125142	+	DOWNSTREAM	3450	--	PREDICTED: uncharacterized protein LOC105181464 [Harpegnathos saltator]	-	-	-	-	-	-	-
MSTRG.26286.1	NW_011952185.1	476235	477001	-	ncbi_105387374	404225	468237	+	DOWNSTREAM	7997	LOC105387374	rap1 GTPase-activating protein 1-like	-	-	-	-	-	-	-
MSTRG.26344.1	NW_011952186.1	157043	158139	+	MSTRG.26341	150313	151693	-	UPSTREAM	5349	--	Ommochrome-binding protein, partial [Papilio machaon]	-	-	-	-	-	-	-
MSTRG.26344.1	NW_011952186.1	157043	158139	+	ncbi_105387383	151803	154793	-	UPSTREAM	2249	LOC105387383	uncharacterized LOC105387383	-	-	-	-	-	-	-
MSTRG.26344.1	NW_011952186.1	157043	158139	+	MSTRG.26345	158666	160907	-	DOWNSTREAM	526	--	PREDICTED: serine protease inhibitor dipetalogastin-like, partial [Amyelois transitella]	-	-	-	-	-	-	-
MSTRG.26344.1	NW_011952186.1	157043	158139	+	ncbi_105387382	146804	150309	+	DOWNSTREAM	6733	LOC105387382	solute carrier family 2	-	-	-	-	-	-	-
MSTRG.26346.1	NW_011952186.1	158672	161288	+	MSTRG.26341	150313	151693	-	UPSTREAM	6978	--	Ommochrome-binding protein, partial [Papilio machaon]	-	-	-	-	-	-	-
MSTRG.26346.1	NW_011952186.1	158672	161288	+	ncbi_105387383	151803	154793	-	UPSTREAM	3878	LOC105387383	uncharacterized LOC105387383	-	-	-	-	-	-	-
MSTRG.26346.1	NW_011952186.1	158672	161288	+	MSTRG.26343	156999	158153	-	UPSTREAM	518	AGRN	PREDICTED: agrin-like [Amyelois transitella]	-	-	-	-	-	-	-
MSTRG.26346.1	NW_011952186.1	158672	161288	+	ncbi_105387382	146804	150309	+	DOWNSTREAM	8362	LOC105387382	solute carrier family 2	-	-	-	-	-	-	-
MSTRG.26347.1	NW_011952186.1	161901	162806	-	ncbi_105387383	151803	154793	-	UPSTREAM	7107	LOC105387383	uncharacterized LOC105387383	-	-	-	-	-	-	-
MSTRG.26347.1	NW_011952186.1	161901	162806	-	MSTRG.26343	156999	158153	-	UPSTREAM	3747	AGRN	PREDICTED: agrin-like [Amyelois transitella]	-	-	-	-	-	-	-
MSTRG.26347.1	NW_011952186.1	161901	162806	-	MSTRG.26345	158666	160907	-	UPSTREAM	993	--	PREDICTED: serine protease inhibitor dipetalogastin-like, partial [Amyelois transitella]	-	-	-	-	-	-	-
MSTRG.26353.1	NW_011952186.1	170713	171324	-	MSTRG.26345	158666	160907	-	UPSTREAM	9805	--	PREDICTED: serine protease inhibitor dipetalogastin-like, partial [Amyelois transitella]	-	-	-	-	-	-	-
MSTRG.26353.1	NW_011952186.1	170713	171324	-	MSTRG.26358	176280	179516	-	DOWNSTREAM	4955	--	-	-	-	-	-	-	-	-
MSTRG.26382.1	NW_011952186.1	355371	377617	+	ncbi_105387410	382991	384981	-	DOWNSTREAM	5373	LOC105387410	MYCBP-associated protein-like	-	-	-	-	-	-	-
MSTRG.26382.1	NW_011952186.1	355371	377617	+	ncbi_105387389	385049	391918	+	UPSTREAM	7431	LOC105387389	carbonic anhydrase 1-like	Metabolism	Energy metabolism	ko00910//Nitrogen metabolism	K01672	-	-	-
MSTRG.26382.1	NW_011952186.1	355371	377617	+	ncbi_105387388	285538	349054	+	DOWNSTREAM	6316	LOC105387388	tyrosine kinase receptor Cad96Ca	-	-	-	-	-	GO:0004672//protein kinase activity	GO:0016310//phosphorylation
MSTRG.26436.3	NW_011952187.1	100793	102507	+	ncbi_105387432	103246	136279	+	UPSTREAM	738	LOC105387432	uncharacterized LOC105387432	Genetic Information Processing	Replication and repair	ko03410//Base excision repair	K03649	-	-	-
MSTRG.26515.4	NW_011952187.1	616442	621909	+	ncbi_105387444	515889	610390	-	UPSTREAM	6051	LOC105387444	myosin-I heavy chain-like	-	-	-	-	-	-	-
MSTRG.26533.1	NW_011952188.1	23665	32809	+	MSTRG.26535	33126	36291	+	UPSTREAM	316	--	PREDICTED: protein ANTAGONIST OF LIKE HETEROCHROMATIN PROTEIN 1-like [Cerapachys biroi]	-	-	-	-	-	-	-
MSTRG.26564.2	NW_011952188.1	367361	375717	-	ncbi_105387451	337553	357691	+	DOWNSTREAM	9669	LOC105387451	alanine aminotransferase 1	Metabolism;Metabolism;Metabolism;Metabolism;Metabolism;Metabolism;Metabolism	Global and overview maps;Global and overview maps;Global and overview maps;Global and overview maps;Amino acid metabolism;Global and overview maps;Amino acid metabolism	ko01100//Metabolic pathways;ko01120//Microbial metabolism in diverse environments;ko01200//Carbon metabolism;ko01230//Biosynthesis of amino acids;ko00250//Alanine, aspartate and glutamate metabolism;ko01210//2-Oxocarboxylic acid metabolism;ko00220//Arginine biosynthesis	K00814;K00814;K00814;K00814;K00814;K00814;K00814	-	-	-
MSTRG.26569.1	NW_011952188.1	430464	432359	-	MSTRG.26568	422467	423957	+	DOWNSTREAM	6506	--	PREDICTED: Ca(2+)/calmodulin-responsive adenylate cyclase-like [Plutella xylostella]	-	-	-	-	-	-	-
MSTRG.26569.1	NW_011952188.1	430464	432359	-	ncbi_105387452	437293	444851	-	DOWNSTREAM	4933	LOC105387452	translocator protein-like	Environmental Information Processing	Signaling molecules and interaction	ko04080//Neuroactive ligand-receptor interaction	K05770	-	-	-
MSTRG.26575.1	NW_011952188.1	450487	451022	+	ncbi_105387453	445289	447181	+	DOWNSTREAM	3305	LOC105387453	translocator protein-like	Environmental Information Processing	Signaling molecules and interaction	ko04080//Neuroactive ligand-receptor interaction	K05770	-	-	-
MSTRG.26575.1	NW_011952188.1	450487	451022	+	ncbi_105387452	437293	444851	-	UPSTREAM	5635	LOC105387452	translocator protein-like	Environmental Information Processing	Signaling molecules and interaction	ko04080//Neuroactive ligand-receptor interaction	K05770	-	-	-
MSTRG.26620.1	NW_011952189.1	48030	48745	-	ncbi_105387516	51678	52523	-	DOWNSTREAM	2932	LOC105387516	uncharacterized LOC105387516	-	-	-	-	-	-	-
XR_960763.1	NW_011952189.1	225234	228241	-	ncbi_105387475	213103	216563	-	UPSTREAM	8670	LOC105387475	D-aspartate oxidase	Cellular Processes;Metabolism	Transport and catabolism;Amino acid metabolism	ko04146//Peroxisome;ko00250//Alanine, aspartate and glutamate metabolism	K00272;K00272	-	GO:0016491//oxidoreductase activity	-
XR_960765.1	NW_011952189.1	330551	334379	-	ncbi_105387489	314434	327310	+	DOWNSTREAM	3240	LOC105387489	septin-2-like	-	-	-	-	-	-	-
XR_960765.1	NW_011952189.1	330551	334379	-	ncbi_105387493	336083	369238	+	UPSTREAM	1703	LOC105387493	serine/threonine-protein kinase unc-51	Environmental Information Processing;Cellular Processes	Signal transduction;Transport and catabolism	ko04150//mTOR signaling pathway;ko04140//Autophagy - animal	K08269;K08269	-	-	-
MSTRG.26666.1	NW_011952189.1	378946	382080	-	ncbi_105387493	336083	369238	+	DOWNSTREAM	9707	LOC105387493	serine/threonine-protein kinase unc-51	Environmental Information Processing;Cellular Processes	Signal transduction;Transport and catabolism	ko04150//mTOR signaling pathway;ko04140//Autophagy - animal	K08269;K08269	-	-	-
MSTRG.26784.1	NW_011952190.1	516659	519659	-	MSTRG.26785	520490	528490	-	DOWNSTREAM	830	pif1	ATP-dependent DNA helicase PIF1 [Orchesella cincta]	-	-	-	-	-	-	-
MSTRG.26819.1	NW_011952191.1	8665	10408	-	ncbi_105387566	11662	44007	-	DOWNSTREAM	1253	LOC105387566	protein I'm not dead yet-like	-	-	-	-	-	-	-
MSTRG.26873.2	NW_011952192.1	36665	37795	+	ncbi_105387605	41163	43663	-	DOWNSTREAM	3367	LOC105387605	uncharacterized LOC105387605	-	-	-	-	-	-	-
MSTRG.26873.2	NW_011952192.1	36665	37795	+	ncbi_105387580	44545	47241	+	UPSTREAM	6749	LOC105387580	sorting nexin lst-4	-	-	-	-	-	-	GO:0006810//transport
MSTRG.26898.1	NW_011952192.1	123340	125181	-	ncbi_105387589	116276	117504	+	DOWNSTREAM	5835	LOC105387589	probable basic-leucine zipper transcription factor N	-	-	-	-	-	-	-
MSTRG.26898.1	NW_011952192.1	123340	125181	-	ncbi_105387588	117933	120057	-	UPSTREAM	3282	LOC105387588	putative nuclease HARBI1	-	-	-	-	-	-	-
MSTRG.26898.1	NW_011952192.1	123340	125181	-	ncbi_105387590	130768	134033	+	UPSTREAM	5586	LOC105387590	POC1 centriolar protein homolog A-like	-	-	-	-	-	-	-
XR_960772.1	NW_011952192.1	138754	139766	+	ncbi_105387590	130768	134033	+	DOWNSTREAM	4720	LOC105387590	POC1 centriolar protein homolog A-like	-	-	-	-	-	-	-
MSTRG.26945.1	NW_011952192.1	520546	525389	-	ncbi_105387609	478813	517927	+	DOWNSTREAM	2618	LOC105387609	teneurin-a	-	-	-	-	-	-	-
MSTRG.27004.3	NW_011952193.1	365073	446632	-	ncbi_105387630	447728	451464	-	DOWNSTREAM	1095	LOC105387630	uncharacterized LOC105387630	-	-	-	-	-	-	-
MSTRG.27015.1	NW_011952193.1	491364	533401	+	ncbi_105387620	469525	481916	-	UPSTREAM	9447	LOC105387620	pancreatic triacylglycerol lipase-like	-	-	-	-	-	-	-
MSTRG.27015.1	NW_011952193.1	491364	533401	+	ncbi_105387624	541534	563579	+	UPSTREAM	8132	LOC105387624	ubiquitin carboxyl-terminal hydrolase 8-like	Cellular Processes	Transport and catabolism	ko04144//Endocytosis	K11839	-	-	-
MSTRG.27109.2	NW_011952194.1	556943	559135	-	ncbi_105387645	559529	574911	+	UPSTREAM	393	LOC105387645	rac GTPase-activating protein 1-like	-	-	-	-	-	-	-
MSTRG.27126.1	NW_011952194.1	630369	631107	+	ncbi_105387652	613716	628170	+	DOWNSTREAM	2198	LOC105387652	inositol polyphosphate 5-phosphatase K-like	Metabolism;Environmental Information Processing;Metabolism	Global and overview maps;Signal transduction;Carbohydrate metabolism	ko01100//Metabolic pathways;ko04070//Phosphatidylinositol signaling system;ko00562//Inositol phosphate metabolism	K01106;K01106;K01106	-	-	-
MSTRG.27136.2	NW_011952195.1	36630	37223	-	ncbi_105387686	1253	28126	-	UPSTREAM	8503	LOC105387686	signal transducer and activator of transcription 5B-like	Environmental Information Processing	Signal transduction	ko04630//Jak-STAT signaling pathway	K11224	-	-	GO:0009987//cellular process
MSTRG.27136.2	NW_011952195.1	36630	37223	-	ncbi_105387666	28969	34807	+	DOWNSTREAM	1822	LOC105387666	la protein homolog	-	-	-	-	-	-	-
MSTRG.27151.2	NW_011952195.1	105265	106682	+	ncbi_105387691	83477	98245	+	DOWNSTREAM	7019	LOC105387691	uncharacterized LOC105387691	-	-	-	-	-	-	-
MSTRG.27151.2	NW_011952195.1	105265	106682	+	ncbi_105387669	100306	101696	+	DOWNSTREAM	3568	LOC105387669	ovalbumin-related protein X-like	-	-	-	-	-	-	-
MSTRG.27151.2	NW_011952195.1	105265	106682	+	ncbi_105387671	108916	128293	+	UPSTREAM	2233	LOC105387671	phytanoyl-CoA dioxygenase	Cellular Processes	Transport and catabolism	ko04146//Peroxisome	K00477	-	-	-
XR_960776.1	NW_011952195.1	295000	296082	-	ncbi_105387696	282856	289131	+	DOWNSTREAM	5868	LOC105387696	ribosomal protein S6 kinase delta-1-like	-	-	-	-	-	-	-
XR_960776.1	NW_011952195.1	295000	296082	-	ncbi_105387678	303742	304908	-	DOWNSTREAM	7659	LOC105387678	uncharacterized LOC105387678	-	-	-	-	-	-	-
MSTRG.27188.1	NW_011952195.1	302223	303089	+	ncbi_105387678	303742	304908	-	DOWNSTREAM	652	LOC105387678	uncharacterized LOC105387678	-	-	-	-	-	-	-
MSTRG.27188.1	NW_011952195.1	302223	303089	+	ncbi_105387677	290312	295335	+	DOWNSTREAM	6887	LOC105387677	uncharacterized LOC105387677	-	-	-	-	-	-	-
MSTRG.27188.1	NW_011952195.1	302223	303089	+	ncbi_105387679	307366	352973	-	DOWNSTREAM	4276	LOC105387679	uncharacterized LOC105387679	-	-	-	-	-	-	-
MSTRG.27242.1	NW_011952196.1	307439	308876	+	ncbi_105387708	314887	319145	-	DOWNSTREAM	6010	LOC105387708	zinc finger protein 436-like	-	-	-	-	-	-	-
MSTRG.27242.1	NW_011952196.1	307439	308876	+	ncbi_105387706	157436	307144	+	DOWNSTREAM	294	LOC105387706	fasciclin-3	-	-	-	-	-	-	-
XR_960779.1	NW_011952196.1	476806	478387	+	ncbi_105387730	482046	486737	+	UPSTREAM	3658	LOC105387730	ER membrane protein complex subunit 1-like	-	-	-	-	-	-	-
MSTRG.27279.1	NW_011952196.1	520281	520544	-	MSTRG.27278	510417	514508	+	DOWNSTREAM	5772	--	AGAP002003-PA-like protein [Anopheles sinensis]	-	-	-	-	-	-	-
MSTRG.27289.1	NW_011952196.1	585854	588959	+	ncbi_105387720	582281	585733	+	DOWNSTREAM	120	LOC105387720	juvenile hormone esterase-like	-	-	-	-	-	-	-
MSTRG.27321.1	NW_011952197.1	332959	334704	+	ncbi_105387757	315199	327845	+	DOWNSTREAM	5113	LOC105387757	kelch-like protein 3	-	-	-	-	-	-	-
MSTRG.27326.1	NW_011952197.1	447958	448952	+	ncbi_105387737	393274	439956	-	UPSTREAM	8001	LOC105387737	G protein-coupled receptor kinase 2-like	Cellular Processes	Transport and catabolism	ko04144//Endocytosis	K08291	-	GO:0004674//protein serine/threonine kinase activity;GO:0032550//purine ribonucleoside binding	GO:0006464//cellular protein modification process;GO:0006796//phosphate-containing compound metabolic process;GO:0045744//negative regulation of G-protein coupled receptor protein signaling pathway
MSTRG.27354.2	NW_011952197.1	593457	593917	-	ncbi_105387745	586460	587034	+	DOWNSTREAM	6422	LOC105387745	uncharacterized LOC105387745	-	-	-	-	-	-	-
MSTRG.27354.2	NW_011952197.1	593457	593917	-	ncbi_105387749	597079	622815	-	DOWNSTREAM	3161	LOC105387749	uncharacterized LOC105387749	-	-	-	-	-	-	-
MSTRG.27406.1	NW_011952198.1	370902	371511	+	ncbi_105387770	364722	365582	+	DOWNSTREAM	5319	LOC105387770	plasmatocyte-spreading peptide-like	-	-	-	-	-	-	-
MSTRG.27431.1	NW_011952198.1	567481	568991	+	ncbi_105387786	544516	567350	-	UPSTREAM	130	LOC105387786	glycerol-3-phosphate acyltransferase 1	Metabolism;Metabolism;Metabolism;Metabolism	Global and overview maps;Global and overview maps;Lipid metabolism;Lipid metabolism	ko01100//Metabolic pathways;ko01110//Biosynthesis of secondary metabolites;ko00564//Glycerophospholipid metabolism;ko00561//Glycerolipid metabolism	K00629;K00629;K00629;K00629	-	-	-
MSTRG.27431.2	NW_011952198.1	567483	568990	+	ncbi_105387786	544516	567350	-	UPSTREAM	132	LOC105387786	glycerol-3-phosphate acyltransferase 1	Metabolism;Metabolism;Metabolism;Metabolism	Global and overview maps;Global and overview maps;Lipid metabolism;Lipid metabolism	ko01100//Metabolic pathways;ko01110//Biosynthesis of secondary metabolites;ko00564//Glycerophospholipid metabolism;ko00561//Glycerolipid metabolism	K00629;K00629;K00629;K00629	-	-	-
MSTRG.27470.1	NW_011952199.1	295443	329395	-	ncbi_105387811	333360	335967	-	DOWNSTREAM	3964	LOC105387811	uncharacterized LOC105387811	-	-	-	-	-	-	-
MSTRG.27562.1	NW_011952200.1	467229	467787	+	ncbi_105387834	477105	503481	-	DOWNSTREAM	9317	LOC105387834	protein dachsous-like	Environmental Information Processing	Signal transduction	ko04391//Hippo signaling pathway -fly	K16507	GO:0016020//membrane	-	-
MSTRG.27571.1	NW_011952200.1	537812	545236	-	ncbi_105387845	547312	623000	-	DOWNSTREAM	2075	LOC105387845	semaphorin-2A-like	-	-	-	-	-	-	GO:0044707//single-multicellular organism process
XR_960786.1	NW_011952201.1	112496	117617	-	ncbi_105387852	103974	111964	-	UPSTREAM	531	LOC105387852	SPARC	-	-	-	-	GO:0044421//extracellular region part	-	-
XR_960786.1	NW_011952201.1	112496	117617	-	ncbi_105387873	122309	128796	+	UPSTREAM	4691	LOC105387873	solute carrier family 2	-	-	-	-	GO:0031224//intrinsic component of membrane	GO:0022857//transmembrane transporter activity	GO:0044763//single-organism cellular process;GO:0044765//single-organism transport
XR_960787.1	NW_011952201.1	255704	268151	+	ncbi_105387857	271123	298255	-	DOWNSTREAM	2971	LOC105387857	high-affinity choline transporter 1	-	-	-	-	GO:0031224//intrinsic component of membrane	-	GO:0044763//single-organism cellular process;GO:0051234//establishment of localization
MSTRG.27679.1	NW_011952202.1	169005	170669	+	ncbi_105387890	177356	179396	-	DOWNSTREAM	6686	LOC105387890	putative nuclease HARBI1	-	-	-	-	-	-	-
MSTRG.27679.2	NW_011952202.1	169396	170661	+	ncbi_105387890	177356	179396	-	DOWNSTREAM	6694	LOC105387890	putative nuclease HARBI1	-	-	-	-	-	-	-
MSTRG.27707.2	NW_011952202.1	436470	437412	+	ncbi_105387896	443745	446782	-	DOWNSTREAM	6332	LOC105387896	calcium-independent protein kinase C-like	-	-	-	-	-	GO:0004672//protein kinase activity	GO:0009987//cellular process
MSTRG.27707.2	NW_011952202.1	436470	437412	+	ncbi_105387895	440256	443045	-	DOWNSTREAM	2843	LOC105387895	pinin-like	Genetic Information Processing;Genetic Information Processing	Translation;Translation	ko03013//RNA transport;ko03015//mRNA surveillance pathway	K13114;K13114	-	-	-
MSTRG.27719.1	NW_011952202.1	509067	549574	-	ncbi_105387898	487972	506170	+	DOWNSTREAM	2896	LOC105387898	high affinity copper uptake protein 1	-	-	-	-	-	GO:0005375//copper ion transmembrane transporter activity	GO:0000041//transition metal ion transport;GO:0010035//response to inorganic substance;GO:0046916//cellular transition metal ion homeostasis
MSTRG.27739.1	NW_011952202.1	623373	625053	+	ncbi_105387916	599735	619284	+	DOWNSTREAM	4088	LOC105387916	RNA-binding protein Nova-2-like	-	-	-	-	-	-	-
MSTRG.28020.3	NW_011952205.1	588665	590982	+	ncbi_105388009	591165	616310	-	DOWNSTREAM	182	LOC105388009	ras-related protein Rab-23-like	Environmental Information Processing	Signal transduction	ko04340//Hedgehog signaling pathway	K06234	-	-	-
MSTRG.28042.2	NW_011952206.1	127110	128689	-	ncbi_105388034	112745	125606	-	UPSTREAM	1503	LOC105388034	dynein heavy chain 12	-	-	-	-	-	-	-
MSTRG.28042.2	NW_011952206.1	127110	128689	-	ncbi_105388033	129291	134595	-	DOWNSTREAM	601	LOC105388033	transmembrane protein 110-like	-	-	-	-	-	-	-
MSTRG.28050.1	NW_011952206.1	165686	168441	+	ncbi_105388050	170825	194354	-	DOWNSTREAM	2383	LOC105388050	protein disabled	Cellular Processes	Transport and catabolism	ko04144//Endocytosis	K12475	-	-	-
MSTRG.28185.1	NW_011952208.1	213959	216515	-	ncbi_105388099	224008	228175	+	UPSTREAM	7492	LOC105388099	calcyclin-binding protein-like	Environmental Information Processing	Signal transduction	ko04310//Wnt signaling pathway	K04507	-	-	-
MSTRG.28264.1	NW_011952209.1	106086	107314	+	ncbi_105388134	70498	96414	+	DOWNSTREAM	9671	LOC105388134	flotillin-1	-	-	-	-	-	-	-
MSTRG.28302.1	NW_011952209.1	439615	441244	-	ncbi_105388145	437209	439197	+	DOWNSTREAM	417	LOC105388145	putative nuclease HARBI1	-	-	-	-	-	-	-
MSTRG.28314.1	NW_011952209.1	532875	533833	+	ncbi_105388147	541527	542638	-	DOWNSTREAM	7693	LOC105388147	uncharacterized protein F12A10.7-like	-	-	-	-	-	-	-
MSTRG.28384.1	NW_011952210.1	353403	357430	+	ncbi_105388181	340465	345471	-	UPSTREAM	7931	LOC105388181	uncharacterized LOC105388181	-	-	-	-	-	-	-
MSTRG.28441.1	NW_011952211.1	317030	318179	+	ncbi_105388192	321511	322064	-	DOWNSTREAM	3331	LOC105388192	60S ribosomal protein L28	Genetic Information Processing	Translation	ko03010//Ribosome	K02903	GO:0030529//intracellular ribonucleoprotein complex	-	GO:0010467//gene expression
MSTRG.28441.1	NW_011952211.1	317030	318179	+	ncbi_105388193	322402	343056	+	UPSTREAM	4222	LOC105388193	uncharacterized LOC105388193	-	-	-	-	-	-	-
MSTRG.28788.4	NW_011952216.1	218155	220931	-	ncbi_105388323	221924	224476	-	DOWNSTREAM	992	LOC105388323	uncharacterized LOC105388323	-	-	-	-	-	-	-
MSTRG.28788.4	NW_011952216.1	218155	220931	-	ncbi_105388326	224716	225718	-	DOWNSTREAM	3784	LOC105388326	DNA replication complex GINS protein SLD5	-	-	-	-	-	-	-
MSTRG.28894.1	NW_011952218.1	17748	21000	+	MSTRG.28892	10066	16134	+	DOWNSTREAM	1613	--	Sperm flagellar protein [Operophtera brumata]	-	-	-	-	-	-	-
MSTRG.28953.1	NW_011952219.1	22052	26694	+	ncbi_105388370	27987	29416	+	UPSTREAM	1292	LOC105388370	uncharacterized LOC105388370	-	-	-	-	-	-	-
MSTRG.28953.1	NW_011952219.1	22052	26694	+	ncbi_105388381	31934	55327	-	DOWNSTREAM	5239	LOC105388381	ubiquitin carboxyl-terminal hydrolase 32-like	-	-	-	-	-	-	-
MSTRG.29030.1	NW_011952219.1	497540	498901	-	ncbi_105388394	504552	528182	+	UPSTREAM	5650	LOC105388394	dynein heavy chain 3	-	-	-	-	-	-	-
MSTRG.29042.1	NW_011952219.1	572306	573823	+	ncbi_105388380	583415	591134	+	UPSTREAM	9591	LOC105388380	organic cation transporter protein-like	-	-	-	-	-	-	-
MSTRG.29050.1	NW_011952220.1	1219	67795	-	ncbi_105388397	77752	101370	+	UPSTREAM	9956	LOC105388397	contactin-associated protein-like 4	-	-	-	-	-	-	-
MSTRG.29094.1	NW_011952220.1	365587	368053	+	ncbi_105388409	363459	365342	-	UPSTREAM	244	LOC105388409	E3 ubiquitin-protein ligase RNF123-like	-	-	-	-	-	-	-
MSTRG.29094.1	NW_011952220.1	365587	368053	+	ncbi_105388410	368845	369796	-	DOWNSTREAM	791	LOC105388410	GPN-loop GTPase 2	-	-	-	-	-	-	-
MSTRG.29123.2	NW_011952220.1	491175	495492	-	ncbi_105388423	484822	488452	-	UPSTREAM	2722	LOC105388423	cuticle protein 19-like	-	-	-	-	-	-	-
MSTRG.29123.2	NW_011952220.1	491175	495492	-	ncbi_105388426	505436	507043	-	DOWNSTREAM	9943	LOC105388426	cuticle protein 7-like	-	-	-	-	-	-	-
MSTRG.29166.1	NW_011952221.1	115388	117211	-	ncbi_105388470	120976	129583	-	DOWNSTREAM	3764	LOC105388470	uncharacterized LOC105388470	-	-	-	-	-	-	-
MSTRG.29246.1	NW_011952222.1	198982	199448	-	ncbi_105388481	207385	285988	+	UPSTREAM	7936	LOC105388481	homeotic protein distal-less-like	-	-	-	-	-	-	-
MSTRG.29261.1	NW_011952222.1	346824	349813	+	ncbi_105388497	357514	364058	-	DOWNSTREAM	7700	LOC105388497	peroxidase-like	-	-	-	-	-	-	-
MSTRG.29293.1	NW_011952222.1	578315	584849	+	ncbi_105388506	569868	576664	+	DOWNSTREAM	1650	LOC105388506	UDP-glucuronosyltransferase 2B18-like	Metabolism;Metabolism;Metabolism;Metabolism;Metabolism;Metabolism;Metabolism;Metabolism;Metabolism;Metabolism	Global and overview maps;Global and overview maps;Carbohydrate metabolism;Carbohydrate metabolism;Xenobiotics biodegradation and metabolism;Xenobiotics biodegradation and metabolism;Metabolism of cofactors and vitamins;Xenobiotics biodegradation and metabolism;Carbohydrate metabolism;Metabolism of cofactors and vitamins	ko01100//Metabolic pathways;ko01110//Biosynthesis of secondary metabolites;ko00500//Starch and sucrose metabolism;ko00040//Pentose and glucuronate interconversions;ko00983//Drug metabolism - other enzymes;ko00980//Metabolism of xenobiotics by cytochrome P450;ko00860//Porphyrin and chlorophyll metabolism;ko00982//Drug metabolism - cytochrome P450;ko00053//Ascorbate and aldarate metabolism;ko00830/…	K00699;K00699;K00699;K00699;K00699;K00699;K00699;K00699;K00699;K00699	-	GO:0016740//transferase activity	-
MSTRG.29451.1	NW_011952224.1	403959	405651	-	ncbi_105388556	410547	438621	-	DOWNSTREAM	4895	LOC105388556	aquaporin AQPAe.a	-	-	-	-	GO:0031224//intrinsic component of membrane	-	GO:0051234//establishment of localization
MSTRG.29461.2	NW_011952224.1	498470	499661	-	ncbi_105388557	493364	498310	+	DOWNSTREAM	159	LOC105388557	probable Golgi SNAP receptor complex member 2	Genetic Information Processing	Folding, sorting and degradation	ko04130//SNARE interactions in vesicular transport	K08496	GO:0005794//Golgi apparatus	-	GO:0051234//establishment of localization
MSTRG.29461.2	NW_011952224.1	498470	499661	-	ncbi_105388559	468935	495434	-	UPSTREAM	3035	LOC105388559	multiple C2 and transmembrane domain-containing protein 1-like	-	-	-	-	-	-	-
MSTRG.29465.1	NW_011952224.1	517831	519220	-	ncbi_105388586	526791	529487	-	DOWNSTREAM	7570	LOC105388586	RNA-directed DNA polymerase from mobile element jockey-like	-	-	-	-	-	-	-
MSTRG.29465.2	NW_011952224.1	517831	519220	-	ncbi_105388586	526791	529487	-	DOWNSTREAM	7570	LOC105388586	RNA-directed DNA polymerase from mobile element jockey-like	-	-	-	-	-	-	-
MSTRG.29477.1	NW_011952225.1	24330	26045	-	ncbi_105388595	33201	33758	+	UPSTREAM	7155	LOC105388595	histone H2B	-	-	-	-	GO:0043231//intracellular membrane-bounded organelle;GO:0043232//intracellular non-membrane-bounded organelle	GO:0003676//nucleic acid binding;GO:0046983//protein dimerization activity	-
MSTRG.29477.1	NW_011952225.1	24330	26045	-	ncbi_105388600	35101	36023	+	UPSTREAM	9055	LOC105388600	histone H3	-	-	-	-	GO:0043231//intracellular membrane-bounded organelle;GO:0043232//intracellular non-membrane-bounded organelle	GO:0003676//nucleic acid binding;GO:0046983//protein dimerization activity	-
MSTRG.29481.1	NW_011952225.1	33256	48426	-	ncbi_105388591	24301	25466	+	DOWNSTREAM	7789	LOC105388591	histone H1B-like	-	-	-	-	-	-	-
MSTRG.29558.1	NW_011952225.1	461569	464987	+	ncbi_105388617	449528	451681	+	DOWNSTREAM	9887	LOC105388617	uncharacterized LOC105388617	-	-	-	-	-	-	-
MSTRG.29560.1	NW_011952225.1	500267	502372	-	ncbi_105388618	504241	536184	-	DOWNSTREAM	1868	LOC105388618	bumetanide-sensitive sodium-(potassium)-chloride cotransporter-like	-	-	-	-	-	-	-
MSTRG.29563.1	NW_011952225.1	502961	503531	-	ncbi_105388618	504241	536184	-	DOWNSTREAM	709	LOC105388618	bumetanide-sensitive sodium-(potassium)-chloride cotransporter-like	-	-	-	-	-	-	-
MSTRG.29689.1	NW_011952227.1	240491	244813	-	ncbi_105388666	246176	248346	-	DOWNSTREAM	1362	LOC105388666	heat shock protein 68-like	Cellular Processes;Genetic Information Processing;Genetic Information Processing;Organismal Systems	Transport and catabolism;Folding, sorting and degradation;Transcription;Aging	ko04144//Endocytosis;ko04141//Protein processing in endoplasmic reticulum;ko03040//Spliceosome;ko04213//Longevity regulating pathway - multiple species	K03283;K03283;K03283;K03283	-	GO:0032550//purine ribonucleoside binding	-
MSTRG.29689.1	NW_011952227.1	240491	244813	-	ncbi_105388664	226910	238580	+	DOWNSTREAM	1910	LOC105388664	facilitated trehalose transporter Tret1-like	-	-	-	-	-	-	-
MSTRG.29774.1	NW_011952228.1	503019	506563	+	ncbi_105388692	516369	517935	+	UPSTREAM	9805	LOC105388692	uncharacterized LOC105388692	-	-	-	-	-	-	-
XR_960825.1	NW_011952228.1	512356	514913	+	ncbi_105388692	516369	517935	+	UPSTREAM	1455	LOC105388692	uncharacterized LOC105388692	-	-	-	-	-	-	-
XR_960825.1	NW_011952228.1	512356	514913	+	ncbi_105388705	518053	523796	-	DOWNSTREAM	3139	LOC105388705	uncharacterized LOC105388705	-	-	-	-	-	-	-
MSTRG.29836.1	NW_011952229.1	479949	480993	-	MSTRG.29837	481045	483932	+	UPSTREAM	51	PDHB	PREDICTED: pyruvate dehydrogenase E1 component subunit beta, mitochondrial [Plutella xylostella]	Metabolism;Metabolism;Metabolism;Metabolism;Metabolism;Organismal Systems;Environmental Information Processing;Human Diseases	Global and overview maps;Global and overview maps;Carbohydrate metabolism;Carbohydrate metabolism;Carbohydrate metabolism;Endocrine system;Signal transduction;Cancers	ko01100//Metabolic pathways;ko01200//Carbon metabolism;ko00620//Pyruvate metabolism;ko00010//Glycolysis / Gluconeogenesis;ko00020//Citrate cycle (TCA cycle);ko04922//Glucagon signaling pathway;ko04066//HIF-1 signaling pathway;ko05230//Central carbon metabolism in cancer	K00162;K00162;K00162;K00162;K00162;K00162;K00162;K00162	-	-	-
MSTRG.29878.3	NW_011952230.1	252746	255161	-	ncbi_105388737	257810	261245	-	DOWNSTREAM	2648	LOC105388737	uncharacterized LOC105388737	-	-	-	-	-	-	-
MSTRG.29878.3	NW_011952230.1	252746	255161	-	ncbi_105388738	263603	265997	-	DOWNSTREAM	8441	LOC105388738	uncharacterized LOC105388738	-	-	-	-	-	-	-
MSTRG.29937.1	NW_011952231.1	64403	64840	+	ncbi_105388765	67523	68954	+	UPSTREAM	2682	LOC105388765	uncharacterized LOC105388765	-	-	-	-	-	-	-
MSTRG.29937.1	NW_011952231.1	64403	64840	+	ncbi_105388793	70432	80279	-	DOWNSTREAM	5591	LOC105388793	PC4 and SFRS1-interacting protein	-	-	-	-	-	-	-
MSTRG.29946.1	NW_011952231.1	122708	128133	+	ncbi_105388767	132560	144022	-	DOWNSTREAM	4426	LOC105388767	uncharacterized LOC105388767	-	-	-	-	-	-	-
MSTRG.29959.1	NW_011952231.1	250035	252905	-	ncbi_105388796	239885	249291	+	DOWNSTREAM	743	LOC105388796	KAT8 regulatory NSL complex subunit 2-like	-	-	-	-	-	-	-
MSTRG.29984.1	NW_011952231.1	495339	503779	-	ncbi_105388787	507803	516760	+	UPSTREAM	4023	LOC105388787	cytochrome P450 4d2-like	-	-	-	-	-	-	-
MSTRG.29999.1	NW_011952231.1	567359	568644	-	ncbi_105388789	527647	562414	+	DOWNSTREAM	4944	LOC105388789	transcription factor HNF-4 homolog	-	-	-	-	-	-	-
MSTRG.30000.1	NW_011952231.1	567381	568644	+	ncbi_105388789	527647	562414	+	DOWNSTREAM	4966	LOC105388789	transcription factor HNF-4 homolog	-	-	-	-	-	-	-
MSTRG.30016.1	NW_011952232.1	145500	147951	-	ncbi_105388804	134251	137006	-	UPSTREAM	8493	LOC105388804	uncharacterized LOC105388804	-	-	-	-	-	-	-
MSTRG.30016.1	NW_011952232.1	145500	147951	-	ncbi_105388820	139241	141007	-	UPSTREAM	4492	LOC105388820	uncharacterized LOC105388820	-	-	-	-	-	-	-
MSTRG.30016.1	NW_011952232.1	145500	147951	-	ncbi_105388805	148310	149073	-	DOWNSTREAM	358	LOC105388805	uncharacterized LOC105388805	-	-	-	-	-	-	-
MSTRG.30016.1	NW_011952232.1	145500	147951	-	ncbi_105388806	149390	150310	+	UPSTREAM	1438	LOC105388806	uncharacterized LOC105388806	-	-	-	-	-	-	-
MSTRG.30016.1	NW_011952232.1	145500	147951	-	ncbi_105388807	150755	151440	+	UPSTREAM	2803	LOC105388807	uncharacterized LOC105388807	-	-	-	-	-	-	-
MSTRG.30016.1	NW_011952232.1	145500	147951	-	ncbi_105388808	151703	152440	+	UPSTREAM	3751	LOC105388808	uncharacterized LOC105388808	-	-	-	-	-	-	-
MSTRG.30016.1	NW_011952232.1	145500	147951	-	ncbi_105388822	155200	164920	-	DOWNSTREAM	7248	LOC105388822	sodium-dependent serotonin transporter	-	-	-	-	GO:0031224//intrinsic component of membrane	GO:0015291//secondary active transmembrane transporter activity	GO:0044763//single-organism cellular process;GO:0044765//single-organism transport
MSTRG.30019.2	NW_011952232.1	149397	151356	+	ncbi_105388820	139241	141007	-	UPSTREAM	8389	LOC105388820	uncharacterized LOC105388820	-	-	-	-	-	-	-
MSTRG.30019.2	NW_011952232.1	149397	151356	+	ncbi_105388805	148310	149073	-	UPSTREAM	323	LOC105388805	uncharacterized LOC105388805	-	-	-	-	-	-	-
MSTRG.30019.2	NW_011952232.1	149397	151356	+	ncbi_105388808	151703	152440	+	UPSTREAM	346	LOC105388808	uncharacterized LOC105388808	-	-	-	-	-	-	-
MSTRG.30019.2	NW_011952232.1	149397	151356	+	ncbi_105388822	155200	164920	-	DOWNSTREAM	3843	LOC105388822	sodium-dependent serotonin transporter	-	-	-	-	GO:0031224//intrinsic component of membrane	GO:0015291//secondary active transmembrane transporter activity	GO:0044763//single-organism cellular process;GO:0044765//single-organism transport
MSTRG.30103.1	NW_011952233.1	466875	467854	+	ncbi_105388852	432470	464981	-	UPSTREAM	1893	LOC105388852	fasciculation and elongation protein zeta-2	-	-	-	-	-	-	-
MSTRG.30103.1	NW_011952233.1	466875	467854	+	ncbi_105388854	473056	476539	-	DOWNSTREAM	5201	LOC105388854	dopamine N-acetyltransferase-like	-	-	-	-	-	-	-
MSTRG.30126.1	NW_011952234.1	52954	65632	-	ncbi_105388864	67709	90912	-	DOWNSTREAM	2076	LOC105388864	cilia- and flagella-associated protein 58-like	-	-	-	-	-	-	-
MSTRG.30156.1	NW_011952234.1	311424	313104	+	ncbi_105388868	233612	310823	+	DOWNSTREAM	600	LOC105388868	RNA-binding protein fusilli	-	-	-	-	-	-	-
MSTRG.30157.1	NW_011952234.1	313337	316243	-	ncbi_105388870	325902	330388	-	DOWNSTREAM	9658	LOC105388870	ubiquitin-like modifier-activating enzyme 5	-	-	-	-	-	-	-
MSTRG.30157.1	NW_011952234.1	313337	316243	-	ncbi_105388868	233612	310823	+	DOWNSTREAM	2513	LOC105388868	RNA-binding protein fusilli	-	-	-	-	-	-	-
MSTRG.30221.1	NW_011952235.1	126504	127705	-	ncbi_105388911	136150	144749	-	DOWNSTREAM	8444	LOC105388911	fanconi-associated nuclease 1-like	Genetic Information Processing	Replication and repair	ko03460//Fanconi anemia pathway	K15363	-	-	-
MSTRG.30253.1	NW_011952235.1	356376	358700	-	ncbi_105388916	365087	366958	+	UPSTREAM	6386	LOC105388916	catalase-2-like	Metabolism;Metabolism;Metabolism;Cellular Processes;Environmental Information Processing;Organismal Systems;Metabolism;Metabolism	Global and overview maps;Global and overview maps;Global and overview maps;Transport and catabolism;Signal transduction;Aging;Carbohydrate metabolism;Amino acid metabolism	ko01110//Biosynthesis of secondary metabolites;ko01130//Biosynthesis of antibiotics;ko01200//Carbon metabolism;ko04146//Peroxisome;ko04068//FoxO signaling pathway;ko04213//Longevity regulating pathway - multiple species;ko00630//Glyoxylate and dicarboxylate metabolism;ko00380//Tryptophan metabolism	K03781;K03781;K03781;K03781;K03781;K03781;K03781;K03781	-	-	-
MSTRG.30273.1	NW_011952235.1	518416	519663	-	ncbi_105388903	485548	517724	-	UPSTREAM	691	LOC105388903	neurexin-4	-	-	-	-	-	-	-
MSTRG.30275.1	NW_011952235.1	527311	534706	-	ncbi_105388903	485548	517724	-	UPSTREAM	9586	LOC105388903	neurexin-4	-	-	-	-	-	-	-
MSTRG.30275.1	NW_011952235.1	527311	534706	-	ncbi_105388907	539750	541598	+	UPSTREAM	5043	LOC105388907	protoporphyrinogen oxidase	Metabolism;Metabolism;Metabolism	Global and overview maps;Global and overview maps;Metabolism of cofactors and vitamins	ko01100//Metabolic pathways;ko01110//Biosynthesis of secondary metabolites;ko00860//Porphyrin and chlorophyll metabolism	K00231;K00231;K00231	-	-	-
MSTRG.30396.1	NW_011952237.1	455124	461417	+	ncbi_105388950	467323	470907	-	DOWNSTREAM	5905	LOC105388950	uncharacterized LOC105388950	-	-	-	-	-	-	-
MSTRG.30416.1	NW_011952238.1	50794	52763	-	ncbi_105388985	1006	49021	-	UPSTREAM	1772	LOC105388985	protein zer-1 homolog	-	-	-	-	-	-	-
MSTRG.30444.1	NW_011952238.1	244683	245661	+	MSTRG.30445	250718	257173	+	UPSTREAM	5056	GIP	Retrovirus-related Pol polyprotein from transposon TNT 1-94 [Papilio machaon]	-	-	-	-	-	-	-
MSTRG.30444.1	NW_011952238.1	244683	245661	+	MSTRG.30449	252665	258021	+	UPSTREAM	7003	GIP	Retrovirus-related Pol polyprotein from transposon TNT 1-94 [Papilio machaon]	-	-	-	-	-	-	-
MSTRG.30446.1	NW_011952238.1	249321	254607	-	MSTRG.30450	259933	263112	+	UPSTREAM	5325	--	-	-	-	-	-	-	-	-
MSTRG.30446.1	NW_011952238.1	249321	254607	-	MSTRG.30451	259951	263086	-	DOWNSTREAM	5343	--	-	-	-	-	-	-	-	-
MSTRG.30447.1	NW_011952238.1	250388	255559	-	MSTRG.30450	259933	263112	+	UPSTREAM	4373	--	-	-	-	-	-	-	-	-
MSTRG.30447.1	NW_011952238.1	250388	255559	-	MSTRG.30451	259951	263086	-	DOWNSTREAM	4391	--	-	-	-	-	-	-	-	-
XR_960830.1	NW_011952238.1	284202	285796	+	ncbi_105388973	269480	274526	+	DOWNSTREAM	9675	LOC105388973	uncharacterized LOC105388973	-	-	-	-	-	-	-
MSTRG.30470.1	NW_011952238.1	473415	477832	-	ncbi_105388983	478101	484371	-	DOWNSTREAM	268	LOC105388983	carboxypeptidase B-like	-	-	-	-	-	-	-
MSTRG.30490.1	NW_011952239.1	66287	67917	-	ncbi_105389019	43046	57913	+	DOWNSTREAM	8373	LOC105389019	protein turtle-like	-	-	-	-	-	-	-
MSTRG.30515.1	NW_011952239.1	234628	235748	+	ncbi_105389024	219047	228225	-	UPSTREAM	6402	LOC105389024	glutamate [NMDA] receptor subunit 1	Environmental Information Processing	Signaling molecules and interaction	ko04080//Neuroactive ligand-receptor interaction	K05208	-	-	-
MSTRG.30515.1	NW_011952239.1	234628	235748	+	ncbi_105389026	245733	249509	+	UPSTREAM	9984	LOC105389026	mitochondrial glutamate carrier 2-like	-	-	-	-	GO:0016020//membrane	-	-
MSTRG.30543.2	NW_011952239.1	482801	486005	-	ncbi_105389028	454462	475904	-	UPSTREAM	6896	LOC105389028	endochitinase	Metabolism;Metabolism	Global and overview maps;Carbohydrate metabolism	ko01100//Metabolic pathways;ko00520//Amino sugar and nucleotide sugar metabolism	K01183;K01183	-	-	-
MSTRG.30543.2	NW_011952239.1	482801	486005	-	ncbi_105389015	486126	542734	-	DOWNSTREAM	120	LOC105389015	uncharacterized LOC105389015	-	-	-	-	-	-	-
MSTRG.30679.1	NW_011952241.1	436928	438676	+	ncbi_105389055	432803	436575	+	DOWNSTREAM	352	LOC105389055	delta(14)-sterol reductase-like	-	-	-	-	-	-	-
MSTRG.30679.1	NW_011952241.1	436928	438676	+	ncbi_105389054	425679	431554	+	DOWNSTREAM	5373	LOC105389054	probable phospholipid hydroperoxide glutathione peroxidase	Metabolism;Metabolism	Metabolism of other amino acids;Lipid metabolism	ko00480//Glutathione metabolism;ko00590//Arachidonic acid metabolism	K00432;K00432	-	GO:0004601//peroxidase activity	GO:0006950//response to stress;GO:0044710//single-organism metabolic process
MSTRG.30706.1	NW_011952242.1	84367	85431	+	MSTRG.30704	74981	78312	+	DOWNSTREAM	6054	--	-	-	-	-	-	-	-	-
MSTRG.30706.1	NW_011952242.1	84367	85431	+	MSTRG.30705	75853	78320	-	UPSTREAM	6046	--	-	-	-	-	-	-	-	-
MSTRG.30742.1	NW_011952242.1	256024	257170	-	ncbi_105389093	231892	250484	-	UPSTREAM	5539	LOC105389093	uncharacterized LOC105389093	-	-	-	-	-	-	-
MSTRG.30750.1	NW_011952242.1	277573	278627	-	ncbi_105389094	268428	268889	+	DOWNSTREAM	8683	LOC105389094	uncharacterized LOC105389094	-	-	-	-	-	-	-
XR_960841.1	NW_011952243.1	298610	308056	-	ncbi_105389107	313415	315888	+	UPSTREAM	5358	LOC105389107	lipoprotein lipase-like	-	-	-	-	-	-	-
MSTRG.30905.1	NW_011952245.1	249906	253590	+	ncbi_105389187	254395	303861	-	DOWNSTREAM	804	LOC105389187	uncharacterized LOC105389187	-	-	-	-	-	-	-
XR_960843.1	NW_011952245.1	408905	417292	+	ncbi_105389159	402137	408777	-	UPSTREAM	127	LOC105389159	uncharacterized LOC105389159	-	-	-	-	-	-	-
XR_960843.1	NW_011952245.1	408905	417292	+	ncbi_105389189	417392	424318	+	UPSTREAM	99	LOC105389189	sphingomyelin phosphodiesterase	Metabolism;Cellular Processes;Metabolism	Global and overview maps;Transport and catabolism;Lipid metabolism	ko01100//Metabolic pathways;ko04142//Lysosome;ko00600//Sphingolipid metabolism	K12350;K12350;K12350	-	-	-
XR_960843.1	NW_011952245.1	408905	417292	+	ncbi_105389161	424946	427912	-	DOWNSTREAM	7653	LOC105389161	uncharacterized LOC105389161	-	-	-	-	-	-	-
MSTRG.30939.2	NW_011952245.1	443114	443632	+	ncbi_105389164	444010	460506	+	UPSTREAM	377	LOC105389164	delta and Notch-like epidermal growth factor-related receptor	-	-	-	-	GO:0044464//cell part	GO:0005102//receptor binding	GO:0003013//circulatory system process;GO:0007166//cell surface receptor signaling pathway
XR_960845.1	NW_011952246.1	445764	449916	-	ncbi_105389211	451308	453859	+	UPSTREAM	1391	LOC105389211	heat shock protein 68-like	Cellular Processes;Genetic Information Processing;Genetic Information Processing;Organismal Systems	Transport and catabolism;Folding, sorting and degradation;Transcription;Aging	ko04144//Endocytosis;ko04141//Protein processing in endoplasmic reticulum;ko03040//Spliceosome;ko04213//Longevity regulating pathway - multiple species	K03283;K03283;K03283;K03283	-	GO:0032550//purine ribonucleoside binding	-
MSTRG.31004.3	NW_011952246.1	511582	515678	-	ncbi_105389204	523818	529259	+	UPSTREAM	8139	LOC105389204	catalase-like	Metabolism;Metabolism;Metabolism;Cellular Processes;Environmental Information Processing;Organismal Systems;Metabolism;Metabolism	Global and overview maps;Global and overview maps;Global and overview maps;Transport and catabolism;Signal transduction;Aging;Carbohydrate metabolism;Amino acid metabolism	ko01110//Biosynthesis of secondary metabolites;ko01130//Biosynthesis of antibiotics;ko01200//Carbon metabolism;ko04146//Peroxisome;ko04068//FoxO signaling pathway;ko04213//Longevity regulating pathway - multiple species;ko00630//Glyoxylate and dicarboxylate metabolism;ko00380//Tryptophan metabolism	K03781;K03781;K03781;K03781;K03781;K03781;K03781;K03781	-	-	-
XR_960846.1	NW_011952247.1	41791	45240	+	ncbi_105389230	35151	38676	+	DOWNSTREAM	3114	LOC105389230	stress response protein nst1-like	-	-	-	-	-	-	-
MSTRG.31090.1	NW_011952248.1	19927	21011	-	ncbi_105389245	6526	17410	-	UPSTREAM	2516	LOC105389245	facilitated trehalose transporter Tret1-like	-	-	-	-	-	-	-
MSTRG.31206.1	NW_011952250.1	15208	15871	+	ncbi_105389280	24698	25887	+	UPSTREAM	8826	LOC105389280	28S ribosomal protein S28	-	-	-	-	-	-	-
MSTRG.31205.2	NW_011952250.1	18714	19163	+	ncbi_105389280	24698	25887	+	UPSTREAM	5534	LOC105389280	28S ribosomal protein S28	-	-	-	-	-	-	-
MSTRG.31205.2	NW_011952250.1	18714	19163	+	ncbi_105389281	25975	31596	-	DOWNSTREAM	6811	LOC105389281	glutaminase liver isoform	Metabolism;Metabolism;Metabolism;Metabolism	Global and overview maps;Amino acid metabolism;Amino acid metabolism;Metabolism of other amino acids	ko01100//Metabolic pathways;ko00250//Alanine, aspartate and glutamate metabolism;ko00220//Arginine biosynthesis;ko00471//D-Glutamine and D-glutamate metabolism	K01425;K01425;K01425;K01425	-	-	-
MSTRG.31265.1	NW_011952250.1	448770	449921	+	ncbi_105389312	435290	438786	-	UPSTREAM	9983	LOC105389312	outer dense fiber protein 3-like protein 2	-	-	-	-	-	-	-
MSTRG.31314.1	NW_011952251.1	348029	354501	-	MSTRG.31311	345373	346200	+	DOWNSTREAM	1828	--	PREDICTED: ras GTPase-activating protein 1-like [Plutella xylostella]	Environmental Information Processing;Environmental Information Processing;Environmental Information Processing;Organismal Systems	Signal transduction;Signal transduction;Signal transduction;Development	ko04013//MAPK signaling pathway - fly;ko04014//Ras signaling pathway;ko04010//MAPK signaling pathway;ko04360//Axon guidance	K04352;K04352;K04352;K04352	-	-	-
MSTRG.31313.2	NW_011952251.1	348033	354248	+	MSTRG.31311	345373	346200	+	DOWNSTREAM	1832	--	PREDICTED: ras GTPase-activating protein 1-like [Plutella xylostella]	Environmental Information Processing;Environmental Information Processing;Environmental Information Processing;Organismal Systems	Signal transduction;Signal transduction;Signal transduction;Development	ko04013//MAPK signaling pathway - fly;ko04014//Ras signaling pathway;ko04010//MAPK signaling pathway;ko04360//Axon guidance	K04352;K04352;K04352;K04352	-	-	-
MSTRG.31348.1	NW_011952252.1	84345	85561	-	ncbi_105389336	85984	87445	-	DOWNSTREAM	422	LOC105389336	uncharacterized LOC105389336	-	-	-	-	-	-	-
MSTRG.31413.1	NW_011952253.1	206543	226085	+	ncbi_105389372	228393	234835	+	UPSTREAM	2307	LOC105389372	uncharacterized LOC105389372	-	-	-	-	-	-	-
MSTRG.31429.2	NW_011952253.1	379578	392477	-	MSTRG.31430	395045	403061	+	UPSTREAM	2567	Slc7a1	PREDICTED: cationic amino acid transporter 2-like [Papilio polytes]	-	-	-	-	-	-	-
MSTRG.31431.3	NW_011952253.1	409400	424314	-	MSTRG.31430	395045	403061	+	DOWNSTREAM	6338	Slc7a1	PREDICTED: cationic amino acid transporter 2-like [Papilio polytes]	-	-	-	-	-	-	-
MSTRG.31436.1	NW_011952253.1	450434	451526	-	ncbi_105389362	454966	466311	-	DOWNSTREAM	3439	LOC105389362	glycoprotein-N-acetylgalactosamine 3-beta-galactosyltransferase 1-like	Metabolism;Metabolism	Global and overview maps;Glycan biosynthesis and metabolism	ko01100//Metabolic pathways;ko00512//Mucin type O-glycan biosynthesis	K00731;K00731	-	-	-
MSTRG.31461.1	NW_011952254.1	103394	104769	-	ncbi_105389377	111197	112083	+	UPSTREAM	6427	LOC105389377	larval/pupal rigid cuticle protein 66-like	-	-	-	-	-	-	-
MSTRG.31463.1	NW_011952254.1	104929	107253	-	ncbi_105389377	111197	112083	+	UPSTREAM	3943	LOC105389377	larval/pupal rigid cuticle protein 66-like	-	-	-	-	-	-	-
MSTRG.31469.2	NW_011952254.1	120649	121154	+	ncbi_105389377	111197	112083	+	DOWNSTREAM	8565	LOC105389377	larval/pupal rigid cuticle protein 66-like	-	-	-	-	-	-	-
MSTRG.31469.2	NW_011952254.1	120649	121154	+	ncbi_105389379	118785	119702	+	DOWNSTREAM	946	LOC105389379	larval/pupal rigid cuticle protein 66-like	-	-	-	-	-	-	-
MSTRG.31469.2	NW_011952254.1	120649	121154	+	ncbi_105389398	123142	130550	-	DOWNSTREAM	1987	LOC105389398	cuticle protein-like	-	-	-	-	-	-	-
MSTRG.31523.1	NW_011952255.1	211233	214092	-	ncbi_105389409	215402	225198	+	UPSTREAM	1309	LOC105389409	monocarboxylate transporter 12	-	-	-	-	-	-	-
MSTRG.31525.1	NW_011952255.1	225243	226043	+	ncbi_105389409	215402	225198	+	DOWNSTREAM	44	LOC105389409	monocarboxylate transporter 12	-	-	-	-	-	-	-
XR_960858.1	NW_011952257.1	279046	281094	-	ncbi_105389458	287058	291243	+	UPSTREAM	5963	LOC105389458	uncharacterized LOC105389458	-	-	-	-	-	-	-
MSTRG.31648.1	NW_011952257.1	335887	337127	+	ncbi_105389461	322397	330478	+	DOWNSTREAM	5408	LOC105389461	uncharacterized LOC105389461	-	-	-	-	-	-	-
MSTRG.31671.1	NW_011952258.1	1	3012	+	MSTRG.31672	11905	15256	+	UPSTREAM	8892	--	-	-	-	-	-	-	-	-
MSTRG.31673.1	NW_011952258.1	15378	17491	+	ncbi_105389487	4	11593	+	DOWNSTREAM	3784	LOC105389487	1-phosphatidylinositol 4	Metabolism;Environmental Information Processing;Metabolism;Environmental Information Processing;Organismal Systems	Global and overview maps;Signal transduction;Carbohydrate metabolism;Signal transduction;Sensory system	ko01100//Metabolic pathways;ko04070//Phosphatidylinositol signaling system;ko00562//Inositol phosphate metabolism;ko04310//Wnt signaling pathway;ko04745//Phototransduction - fly	K05858;K05858;K05858;K05858;K05858	-	-	-
MSTRG.31673.1	NW_011952258.1	15378	17491	+	MSTRG.31672	11905	15256	+	DOWNSTREAM	121	--	-	-	-	-	-	-	-	-
MSTRG.31708.1	NW_011952258.1	252066	252517	-	ncbi_105389485	239731	246130	-	UPSTREAM	5935	LOC105389485	zinc finger protein 883-like	-	-	-	-	-	-	-
MSTRG.31764.1	NW_011952259.1	328491	330319	+	MSTRG.31765	331607	336764	+	UPSTREAM	1287	--	-	-	-	-	-	-	-	-
MSTRG.31787.1	NW_011952259.1	508507	521602	+	ncbi_105389515	522250	523922	-	DOWNSTREAM	647	LOC105389515	UPF0528 protein CG10038-like	-	-	-	-	-	-	-
MSTRG.31787.1	NW_011952259.1	508507	521602	+	ncbi_105389516	524210	524952	+	UPSTREAM	2607	LOC105389516	omega-amidase NIT2-like	Metabolism	Amino acid metabolism	ko00250//Alanine, aspartate and glutamate metabolism	K13566	-	-	-
MSTRG.31798.1	NW_011952260.1	16825	48089	-	ncbi_105389525	8925	14197	-	UPSTREAM	2627	LOC105389525	alpha-2-macroglobulin receptor-associated protein-like	-	-	-	-	-	-	-
MSTRG.31798.1	NW_011952260.1	16825	48089	-	ncbi_105389526	48180	67040	+	UPSTREAM	90	LOC105389526	E3 ubiquitin-protein ligase RNF19A-like	-	-	-	-	-	-	-
MSTRG.31800.1	NW_011952260.1	66594	68288	-	ncbi_105389527	70466	74848	-	DOWNSTREAM	2177	LOC105389527	RING finger and transmembrane domain-containing protein 2	-	-	-	-	-	-	-
MSTRG.31806.1	NW_011952260.1	109862	113060	+	ncbi_105389532	100851	102964	+	DOWNSTREAM	6897	LOC105389532	serine/threonine-protein kinase Warts-like	Environmental Information Processing	Signal transduction	ko04391//Hippo signaling pathway -fly	K08791	-	-	-
MSTRG.31806.1	NW_011952260.1	109862	113060	+	ncbi_105389533	102990	109777	-	UPSTREAM	84	LOC105389533	valacyclovir hydrolase-like	-	-	-	-	-	-	-
MSTRG.31806.1	NW_011952260.1	109862	113060	+	ncbi_105389536	116766	123361	+	UPSTREAM	3705	LOC105389536	uncharacterized LOC105389536	-	-	-	-	-	-	-
MSTRG.31857.2	NW_011952260.1	512369	512990	-	ncbi_105389557	503288	504840	-	UPSTREAM	7528	LOC105389557	uncharacterized LOC105389557	-	-	-	-	-	-	-
MSTRG.31934.1	NW_011952262.1	15057	15964	-	ncbi_105389601	422	13042	-	UPSTREAM	2014	LOC105389601	toll-like receptor 6	-	-	-	-	-	-	-
MSTRG.32158.1	NW_011952266.1	16078	21110	+	ncbi_105389676	25971	30027	+	UPSTREAM	4860	LOC105389676	aquaporin-like	-	-	-	-	-	-	-
MSTRG.32158.1	NW_011952266.1	16078	21110	+	ncbi_105389667	30400	31240	-	DOWNSTREAM	9289	LOC105389667	ubiquitin-conjugating enzyme E2 S	Genetic Information Processing	Folding, sorting and degradation	ko04120//Ubiquitin mediated proteolysis	K10583	-	-	-
MSTRG.32181.1	NW_011952266.1	152289	153816	-	ncbi_105389683	112883	143312	-	UPSTREAM	8976	LOC105389683	E3 ubiquitin-protein ligase MYCBP2-like	-	-	-	-	-	-	-
MSTRG.32181.1	NW_011952266.1	152289	153816	-	ncbi_105389684	155846	264520	+	UPSTREAM	2029	LOC105389684	triple functional domain protein	-	-	-	-	-	-	-
MSTRG.32192.5	NW_011952266.1	326768	330042	+	ncbi_105389672	330935	375905	-	DOWNSTREAM	892	LOC105389672	ecdysone-induced protein 78C-like	-	-	-	-	-	-	-
MSTRG.32435.1	NW_011952270.1	320385	330862	-	ncbi_105389788	335838	403367	-	DOWNSTREAM	4975	LOC105389788	glutamate receptor 1-like	Environmental Information Processing	Signaling molecules and interaction	ko04080//Neuroactive ligand-receptor interaction	K05199	GO:0016020//membrane	-	GO:0006810//transport;GO:0044699//single-organism process
MSTRG.32624.1	NW_011952274.1	81831	89730	-	ncbi_105389877	69508	71872	-	UPSTREAM	9958	LOC105389877	uncharacterized LOC105389877	-	-	-	-	-	-	-
MSTRG.32624.1	NW_011952274.1	81831	89730	-	ncbi_105389878	90382	91237	+	UPSTREAM	651	LOC105389878	glycoprotein hormone beta-5-like	-	-	-	-	-	-	-
MSTRG.32624.1	NW_011952274.1	81831	89730	-	ncbi_105389880	95356	97547	-	DOWNSTREAM	5625	LOC105389880	UDP-N-acetylglucosamine--dolichyl-phosphate N-acetylglucosaminephosphotransferase-like	Metabolism;Metabolism	Global and overview maps;Glycan biosynthesis and metabolism	ko01100//Metabolic pathways;ko00510//N-Glycan biosynthesis	K01001;K01001	-	-	-
MSTRG.32655.1	NW_011952274.1	208545	221022	+	ncbi_105389885	204461	208094	+	DOWNSTREAM	450	LOC105389885	trypsin CFT-1-like	Environmental Information Processing	Signaling molecules and interaction	ko04080//Neuroactive ligand-receptor interaction	K01312	-	-	-
MSTRG.32717.1	NW_011952275.1	236263	240321	-	ncbi_105389908	246913	248388	-	DOWNSTREAM	6591	LOC105389908	uncharacterized LOC105389908	-	-	-	-	-	-	-
MSTRG.32717.1	NW_011952275.1	236263	240321	-	ncbi_105389909	242992	264594	+	UPSTREAM	2670	LOC105389909	actin-like protein 6A	-	-	-	-	GO:0031981//nuclear lumen;GO:1902494//catalytic complex	-	GO:0044260//cellular macromolecule metabolic process;GO:0090304//nucleic acid metabolic process
XR_960871.1	NW_011952275.1	353559	359537	-	ncbi_105389915	366495	373926	-	DOWNSTREAM	6957	LOC105389915	uncharacterized LOC105389915	-	-	-	-	-	-	-
MSTRG.32760.1	NW_011952276.1	52749	54053	-	MSTRG.32762	58384	59689	+	UPSTREAM	4330	--	PREDICTED: 5-hydroxytryptamine receptor 1A-alpha [Papilio xuthus]	-	-	-	-	-	-	-
XR_960873.1	NW_011952276.1	358396	360502	+	ncbi_105389932	360751	362591	-	DOWNSTREAM	248	LOC105389932	uncharacterized LOC105389932	-	-	-	-	-	-	-
XR_960873.1	NW_011952276.1	358396	360502	+	ncbi_105389933	367494	369840	-	DOWNSTREAM	6991	LOC105389933	uncharacterized LOC105389933	-	-	-	-	-	-	-
MSTRG.32867.1	NW_011952278.1	53706	53991	+	ncbi_105389954	4075	46794	+	DOWNSTREAM	6911	LOC105389954	multidrug resistance-associated protein 4-like	-	-	-	-	-	-	-
MSTRG.32868.1	NW_011952278.1	54406	55042	-	ncbi_105389954	4075	46794	+	DOWNSTREAM	7611	LOC105389954	multidrug resistance-associated protein 4-like	-	-	-	-	-	-	-
MSTRG.32887.1	NW_011952278.1	266584	267346	-	ncbi_105389971	269933	277116	+	UPSTREAM	2586	LOC105389971	armadillo repeat-containing protein 6 homolog	-	-	-	-	-	-	-
MSTRG.32887.1	NW_011952278.1	266584	267346	-	ncbi_105389970	256848	264481	+	DOWNSTREAM	2102	LOC105389970	PRKCA-binding protein-like	-	-	-	-	-	-	-
MSTRG.32909.1	NW_011952278.1	403200	405439	+	MSTRG.32907	384541	393436	-	UPSTREAM	9763	L	PREDICTED: zinc finger BED domain-containing protein 1-like [Anoplophora glabripennis]	-	-	-	-	-	-	-
MSTRG.33013.1	NW_011952280.1	389114	393976	+	ncbi_105390021	382065	388609	+	DOWNSTREAM	504	LOC105390021	uncharacterized LOC105390021	-	-	-	-	-	-	-
MSTRG.33054.3	NW_011952281.1	162187	166525	-	ncbi_105390045	124755	156204	+	DOWNSTREAM	5982	LOC105390045	la-related protein 1B-like	-	-	-	-	-	-	-
MSTRG.33163.1	NW_011952282.1	309277	314583	+	ncbi_105390073	323777	326181	+	UPSTREAM	9193	LOC105390073	ribonuclease Oy-like	-	-	-	-	-	-	-
MSTRG.33192.1	NW_011952283.1	8269	9534	-	ncbi_105390096	12922	20361	-	DOWNSTREAM	3387	LOC105390096	JNK-interacting protein 1	-	-	-	-	-	-	-
MSTRG.33197.1	NW_011952283.1	25588	27192	+	ncbi_105390096	12922	20361	-	UPSTREAM	5226	LOC105390096	JNK-interacting protein 1	-	-	-	-	-	-	-
MSTRG.33237.3	NW_011952283.1	313223	314448	+	ncbi_105390129	322332	324612	-	DOWNSTREAM	7883	LOC105390129	uncharacterized LOC105390129	-	-	-	-	-	-	-
MSTRG.33388.1	NW_011952286.1	145089	148955	+	ncbi_105390172	150819	154959	+	UPSTREAM	1863	LOC105390172	uncharacterized LOC105390172	-	-	-	-	-	-	-
MSTRG.33445.1	NW_011952287.1	166078	206695	+	ncbi_105390184	142817	161944	+	DOWNSTREAM	4133	LOC105390184	uncharacterized LOC105390184	-	-	-	-	-	-	-
MSTRG.33519.3	NW_011952288.1	241632	269207	+	ncbi_105390226	276426	278079	+	UPSTREAM	7218	LOC105390226	1	Metabolism;Metabolism	Global and overview maps;Amino acid metabolism	ko01100//Metabolic pathways;ko00270//Cysteine and methionine metabolism	K08967;K08967	-	-	-
MSTRG.33562.1	NW_011952289.1	5914	6496	+	ncbi_105390231	10813	11462	+	UPSTREAM	4316	LOC105390231	transcription factor MafK-like	-	-	-	-	-	-	-
MSTRG.33562.1	NW_011952289.1	5914	6496	+	ncbi_105390245	12668	15569	+	UPSTREAM	6171	LOC105390245	uncharacterized LOC105390245	-	-	-	-	-	-	-
MSTRG.33562.1	NW_011952289.1	5914	6496	+	ncbi_105390246	16234	20706	+	UPSTREAM	9737	LOC105390246	23 kDa integral membrane protein-like	-	-	-	-	-	-	-
MSTRG.33595.1	NW_011952289.1	232540	233204	+	ncbi_105390238	234529	249290	-	DOWNSTREAM	1324	LOC105390238	ATP-binding cassette sub-family G member 1-like	-	-	-	-	-	-	-
MSTRG.33658.1	NW_011952290.1	303609	305829	+	ncbi_105390273	238312	295592	+	DOWNSTREAM	8016	LOC105390273	ryanodine receptor 44F-like	-	-	-	-	-	-	-
MSTRG.33668.1	NW_011952290.1	377749	378204	-	ncbi_105390276	385787	387075	-	DOWNSTREAM	7582	LOC105390276	eukaryotic translation initiation factor 4E-like	Genetic Information Processing;Environmental Information Processing	Translation;Signal transduction	ko03013//RNA transport;ko04150//mTOR signaling pathway	K03259;K03259	GO:0044424//intracellular part	GO:0008135//translation factor activity, RNA binding	GO:0006412//translation
MSTRG.33755.1	NW_011952292.1	324966	327056	-	ncbi_105390298	331383	338081	+	UPSTREAM	4326	LOC105390298	cholinesterase 1-like	-	-	-	-	-	-	-
MSTRG.33755.1	NW_011952292.1	324966	327056	-	ncbi_105390291	327656	330534	-	DOWNSTREAM	599	LOC105390291	esterase FE4-like	-	-	-	-	-	-	-
MSTRG.33803.1	NW_011952293.1	150337	153388	-	ncbi_105390311	139230	147755	+	DOWNSTREAM	2581	LOC105390311	xaa-Pro dipeptidase-like	-	-	-	-	-	-	-
MSTRG.33803.1	NW_011952293.1	150337	153388	-	ncbi_105390312	157661	174773	-	DOWNSTREAM	4272	LOC105390312	importin-7	-	-	-	-	-	-	-
MSTRG.33809.1	NW_011952293.1	186326	187408	+	ncbi_105390313	175078	182021	+	DOWNSTREAM	4304	LOC105390313	probable NADH dehydrogenase [ubiquinone] 1 alpha subcomplex subunit 12	Metabolism;Metabolism	Global and overview maps;Energy metabolism	ko01100//Metabolic pathways;ko00190//Oxidative phosphorylation	K11352;K11352	-	-	-
XR_960888.1	NW_011952297.1	385968	392002	+	ncbi_105390402	380440	385960	+	DOWNSTREAM	7	LOC105390402	uncharacterized LOC105390402	-	-	-	-	-	-	-
XR_960888.1	NW_011952297.1	385968	392002	+	ncbi_105390393	396971	408464	+	UPSTREAM	4968	LOC105390393	aldo-keto reductase AKR2E4-like	Metabolism;Metabolism;Metabolism;Metabolism;Metabolism	Global and overview maps;Carbohydrate metabolism;Carbohydrate metabolism;Lipid metabolism;Carbohydrate metabolism	ko01100//Metabolic pathways;ko00040//Pentose and glucuronate interconversions;ko00052//Galactose metabolism;ko00561//Glycerolipid metabolism;ko00051//Fructose and mannose metabolism	K00011;K00011;K00011;K00011;K00011	-	-	-
MSTRG.34057.1	NW_011952297.1	428488	429897	-	ncbi_105390394	430690	442591	-	DOWNSTREAM	792	LOC105390394	F-box/LRR-repeat protein 2	-	-	-	-	-	-	-
MSTRG.34073.1	NW_011952298.1	149901	158456	+	ncbi_105390407	139738	147011	+	DOWNSTREAM	2889	LOC105390407	uncharacterized LOC105390407	-	-	-	-	-	-	-
MSTRG.34090.2	NW_011952298.1	330798	335191	-	ncbi_105390429	295468	330251	+	DOWNSTREAM	546	LOC105390429	dynein heavy chain 3	-	-	-	-	-	GO:0017111//nucleoside-triphosphatase activity	-
MSTRG.34218.4	NW_011952300.1	389137	390255	-	ncbi_105390497	395933	399455	-	DOWNSTREAM	5677	LOC105390497	uncharacterized LOC105390497	-	-	-	-	-	-	-
MSTRG.34399.1	NW_011952304.1	220408	226168	+	ncbi_105390561	230025	231644	+	UPSTREAM	3856	LOC105390561	embryonic stem cell-specific 5-hydroxymethylcytosine-binding protein	-	-	-	-	-	-	-
MSTRG.34399.1	NW_011952304.1	220408	226168	+	ncbi_105390562	234357	235379	+	UPSTREAM	8188	LOC105390562	SAP domain-containing ribonucleoprotein	-	-	-	-	-	-	-
MSTRG.34399.1	NW_011952304.1	220408	226168	+	ncbi_105390580	196038	219735	+	DOWNSTREAM	672	LOC105390580	mediator of RNA polymerase II transcription subunit 1.1	-	-	-	-	-	-	-
MSTRG.34420.1	NW_011952304.1	318922	324034	-	ncbi_105390563	327573	330820	+	UPSTREAM	3538	LOC105390563	cytochrome c oxidase subunit 5B	Metabolism;Metabolism	Global and overview maps;Energy metabolism	ko01100//Metabolic pathways;ko00190//Oxidative phosphorylation	K02265;K02265	-	-	-
MSTRG.34434.1	NW_011952304.1	405945	411071	+	ncbi_105390573	395073	405932	+	DOWNSTREAM	12	LOC105390573	vesicle-associated membrane protein 2-like	Genetic Information Processing	Folding, sorting and degradation	ko04130//SNARE interactions in vesicular transport	K13504	-	-	-
MSTRG.34434.1	NW_011952304.1	405945	411071	+	ncbi_105390588	418172	446174	+	UPSTREAM	7100	LOC105390588	activating signal cointegrator 1 complex subunit 3-like	-	-	-	-	-	-	-
MSTRG.34475.1	NW_011952305.1	324643	325186	+	ncbi_105390609	306933	316021	+	DOWNSTREAM	8621	LOC105390609	molybdenum cofactor sulfurase	-	-	-	-	-	GO:0003824//catalytic activity;GO:0043168//anion binding;GO:0046914//transition metal ion binding	GO:0009108//coenzyme biosynthetic process
MSTRG.34496.1	NW_011952306.1	3408	8954	-	ncbi_105390616	107	3261	+	DOWNSTREAM	146	LOC105390616	protein split ends-like	-	-	-	-	-	-	-
MSTRG.34537.3	NW_011952306.1	306037	308025	+	ncbi_105390647	308352	317098	-	DOWNSTREAM	326	LOC105390647	stress response protein NST1-like	Metabolism;Metabolism	Global and overview maps;Amino acid metabolism	ko01100//Metabolic pathways;ko00280//Valine, leucine and isoleucine degradation	K05607;K05607	-	-	-
MSTRG.34550.1	NW_011952306.1	383906	384424	-	MSTRG.34551	384480	388370	-	DOWNSTREAM	55	--	PREDICTED: RNA-directed DNA polymerase from mobile element jockey-like [Plutella xylostella]	-	-	-	-	-	-	-
MSTRG.34550.1	NW_011952306.1	383906	384424	-	ncbi_105390649	338256	374934	+	DOWNSTREAM	8971	LOC105390649	uncharacterized LOC105390649	-	-	-	-	-	-	-
MSTRG.34673.2	NW_011952309.1	11014	11451	+	ncbi_105390712	1233	4005	+	DOWNSTREAM	7008	LOC105390712	uncharacterized LOC105390712	-	-	-	-	-	-	-
MSTRG.34673.2	NW_011952309.1	11014	11451	+	ncbi_105390693	13497	16182	-	DOWNSTREAM	2045	LOC105390693	facilitated trehalose transporter Tret1-2 homolog	-	-	-	-	GO:0016020//membrane	GO:0015149//hexose transmembrane transporter activity	GO:0015766//disaccharide transport
MSTRG.34673.2	NW_011952309.1	11014	11451	+	ncbi_105390694	11846	39861	+	UPSTREAM	394	LOC105390694	RING-box protein 2-like	Genetic Information Processing	Folding, sorting and degradation	ko04120//Ubiquitin mediated proteolysis	K10611	-	-	-
MSTRG.34693.1	NW_011952309.1	215937	217841	-	MSTRG.34692	206538	213316	-	UPSTREAM	2620	--	-	-	-	-	-	-	-	-
MSTRG.34720.1	NW_011952309.1	344038	348072	-	ncbi_105390717	351103	364672	-	DOWNSTREAM	3030	LOC105390717	uncharacterized LOC105390717	-	-	-	-	-	-	-
MSTRG.34755.1	NW_011952310.1	126211	126837	+	ncbi_105390723	128652	133218	+	UPSTREAM	1814	LOC105390723	pyruvate kinase-like	Metabolism;Metabolism;Metabolism;Metabolism;Metabolism;Metabolism;Metabolism;Metabolism;Metabolism	Global and overview maps;Global and overview maps;Global and overview maps;Global and overview maps;Nucleotide metabolism;Global and overview maps;Global and overview maps;Carbohydrate metabolism;Carbohydrate metabolism	ko01100//Metabolic pathways;ko01110//Biosynthesis of secondary metabolites;ko01130//Biosynthesis of antibiotics;ko01120//Microbial metabolism in diverse environments;ko00230//Purine metabolism;ko01200//Carbon metabolism;ko01230//Biosynthesis of amino acids;ko00620//Pyruvate metabolism;ko00010//Glycolysis / Gluconeogenesis	K00873;K00873;K00873;K00873;K00873;K00873;K00873;K00873;K00873	-	-	-
MSTRG.34792.1	NW_011952310.1	395098	396059	-	ncbi_105390732	357121	385920	+	DOWNSTREAM	9177	LOC105390732	Down syndrome cell adhesion molecule-like protein 1 homolog	-	-	-	-	-	-	-
MSTRG.34794.2	NW_011952310.1	407707	409169	+	ncbi_105390741	410858	424037	-	DOWNSTREAM	1688	LOC105390741	ankyrin repeat and BTB/POZ domain-containing protein 2-like	-	-	-	-	-	-	-
MSTRG.34886.2	NW_011952312.1	213258	214661	-	MSTRG.34880	198692	209401	+	DOWNSTREAM	3856	pol	PREDICTED: retrovirus-related Pol polyprotein from transposon 17.6 [Tribolium castaneum]	Environmental Information Processing;Human Diseases	Signal transduction;Infectious diseases	ko04330//Notch signaling pathway;ko05169//Epstein-Barr virus infection	K06065;K06065	-	-	-
MSTRG.34891.1	NW_011952312.1	246759	247122	-	MSTRG.34887	230118	243781	-	UPSTREAM	2977	--	reverse transcriptase, partial [Lasius niger]	-	-	-	-	-	-	-
MSTRG.34891.1	NW_011952312.1	246759	247122	-	MSTRG.34893	249659	251466	+	UPSTREAM	2536	--	hypothetical protein ALC57_08299 [Trachymyrmex cornetzi]	-	-	-	-	-	-	-
MSTRG.34920.1	NW_011952312.1	375343	377112	-	ncbi_105390771	382053	382691	+	UPSTREAM	4940	LOC105390771	uncharacterized LOC105390771	-	-	-	-	-	-	-
MSTRG.34928.2	NW_011952312.1	424400	425907	+	ncbi_105390765	419038	420502	+	DOWNSTREAM	3897	LOC105390765	histidine triad nucleotide-binding protein 3-like	-	-	-	-	-	-	-
MSTRG.34928.2	NW_011952312.1	424400	425907	+	ncbi_105390767	421969	424166	+	DOWNSTREAM	233	LOC105390767	motile sperm domain-containing protein 2-like	-	-	-	-	-	-	-
MSTRG.34964.1	NW_011952313.1	187358	189560	+	ncbi_105390788	184723	187257	+	DOWNSTREAM	100	LOC105390788	erlin-2-like	-	-	-	-	-	-	-
MSTRG.35138.1	NW_011952317.1	65709	67312	-	ncbi_105390880	52843	57047	+	DOWNSTREAM	8661	LOC105390880	protein yellow-like	-	-	-	-	-	-	-
MSTRG.35138.1	NW_011952317.1	65709	67312	-	ncbi_105390881	69290	104058	+	UPSTREAM	1977	LOC105390881	lysine-specific demethylase 5A-like	-	-	-	-	-	-	-
MSTRG.35151.1	NW_011952317.1	159741	163737	-	ncbi_105390876	164903	176707	-	DOWNSTREAM	1165	LOC105390876	transcriptional activator protein Pur-alpha	-	-	-	-	-	-	-
MSTRG.35151.1	NW_011952317.1	159741	163737	-	MSTRG.35144	116227	153405	-	UPSTREAM	6335	--	PREDICTED: facilitated trehalose transporter Tret1-2 homolog [Papilio polytes]	-	-	-	-	-	-	-
MSTRG.35156.1	NW_011952317.1	192219	193236	-	ncbi_105390882	196122	231283	-	DOWNSTREAM	2885	LOC105390882	trithorax group protein osa	Genetic Information Processing	Replication and repair	ko03410//Base excision repair	K03649	-	-	-
MSTRG.35174.2	NW_011952317.1	296438	296855	+	ncbi_105390885	270969	289279	-	UPSTREAM	7158	LOC105390885	epidermal growth factor receptor kinase substrate 8-like	-	-	-	-	-	-	-
MSTRG.35205.1	NW_011952318.1	180184	183024	+	ncbi_105390897	187255	215627	-	DOWNSTREAM	4230	LOC105390897	calsyntenin-1	-	-	-	-	-	-	-
MSTRG.35261.1	NW_011952319.1	385466	396323	+	ncbi_105390910	371664	384191	+	DOWNSTREAM	1274	LOC105390910	serine/threonine-protein kinase minibrain-like	-	-	-	-	-	-	-
MSTRG.35349.1	NW_011952321.1	217613	218945	+	ncbi_105390942	184814	214134	+	DOWNSTREAM	3478	LOC105390942	alpha-tocopherol transfer protein-like	-	-	-	-	-	-	-
MSTRG.35418.1	NW_011952322.1	361670	362569	+	ncbi_105390974	352395	357793	+	DOWNSTREAM	3876	LOC105390974	toll-like receptor 3	-	-	-	-	-	-	-
MSTRG.35448.1	NW_011952323.1	94827	101066	-	ncbi_105390985	101201	102181	-	DOWNSTREAM	134	LOC105390985	immediate early response 3-interacting protein 1-like	-	-	-	-	-	-	-
MSTRG.35453.3	NW_011952323.1	136435	139940	+	MSTRG.35460	146911	149750	+	UPSTREAM	6970	Pol	PREDICTED: RNA-directed DNA polymerase from mobile element jockey-like [Amyelois transitella]	-	-	-	-	-	-	-
MSTRG.35466.1	NW_011952323.1	170042	170915	+	ncbi_105390997	175464	177686	+	UPSTREAM	4548	LOC105390997	membrane alanyl aminopeptidase-like	Metabolism;Metabolism	Global and overview maps;Metabolism of other amino acids	ko01100//Metabolic pathways;ko00480//Glutathione metabolism	K11140;K11140	-	-	-
MSTRG.35466.1	NW_011952323.1	170042	170915	+	ncbi_105390988	180399	195642	+	UPSTREAM	9483	LOC105390988	membrane alanyl aminopeptidase-like	Metabolism;Metabolism	Global and overview maps;Metabolism of other amino acids	ko01100//Metabolic pathways;ko00480//Glutathione metabolism	K11140;K11140	-	GO:0046914//transition metal ion binding;GO:0070011//peptidase activity, acting on L-amino acid peptides	GO:0019538//protein metabolic process
MSTRG.35466.1	NW_011952323.1	170042	170915	+	ncbi_105390996	155209	168945	+	DOWNSTREAM	1096	LOC105390996	aminopeptidase N-like	Metabolism;Metabolism	Global and overview maps;Metabolism of other amino acids	ko01100//Metabolic pathways;ko00480//Glutathione metabolism	K11140;K11140	-	-	-
XR_960922.1	NW_011952325.1	110515	111124	+	ncbi_105391046	109141	110372	-	UPSTREAM	142	LOC105391046	uncharacterized LOC105391046	-	-	-	-	-	-	-
XR_960922.1	NW_011952325.1	110515	111124	+	ncbi_105391047	111725	114536	+	UPSTREAM	600	LOC105391047	uncharacterized LOC105391047	-	-	-	-	-	-	-
XR_960922.1	NW_011952325.1	110515	111124	+	ncbi_105391048	119237	142032	+	UPSTREAM	8112	LOC105391048	uncharacterized LOC105391048	-	-	-	-	-	-	-
MSTRG.35576.1	NW_011952325.1	318077	319245	-	MSTRG.35577	321861	326756	+	UPSTREAM	2615	Mdr49	PREDICTED: multidrug resistance protein homolog 49-like [Bombyx mori]	Environmental Information Processing;Human Diseases;Human Diseases;Organismal Systems	Membrane transport;Cancers;Cancers;Digestive system	ko02010//ABC transporters;ko05206//MicroRNAs in cancer;ko05226//Gastric cancer;ko04976//Bile secretion	K05658;K05658;K05658;K05658	-	-	-
MSTRG.35576.1	NW_011952325.1	318077	319245	-	MSTRG.35578	327875	330260	+	UPSTREAM	8629	Mdr65	Multidrug resistance protein 2 [Papilio machaon]	Environmental Information Processing;Human Diseases;Human Diseases;Organismal Systems	Membrane transport;Cancers;Cancers;Digestive system	ko02010//ABC transporters;ko05206//MicroRNAs in cancer;ko05226//Gastric cancer;ko04976//Bile secretion	K05658;K05658;K05658;K05658	-	-	-
MSTRG.35576.1	NW_011952325.1	318077	319245	-	MSTRG.35572	289585	314512	+	DOWNSTREAM	3564	--	ATP-binding cassette transporter [Danaus plexippus]	Environmental Information Processing;Human Diseases;Human Diseases;Organismal Systems	Membrane transport;Cancers;Cancers;Digestive system	ko02010//ABC transporters;ko05206//MicroRNAs in cancer;ko05226//Gastric cancer;ko04976//Bile secretion	K05658;K05658;K05658;K05658	-	-	-
MSTRG.35576.1	NW_011952325.1	318077	319245	-	MSTRG.35573	309690	315723	+	DOWNSTREAM	2353	--	PREDICTED: multidrug resistance protein homolog 49-like [Bombyx mori]	Environmental Information Processing;Human Diseases;Human Diseases;Organismal Systems	Membrane transport;Cancers;Cancers;Digestive system	ko02010//ABC transporters;ko05206//MicroRNAs in cancer;ko05226//Gastric cancer;ko04976//Bile secretion	K05658;K05658;K05658;K05658	-	-	-
MSTRG.35681.1	NW_011952327.1	297863	299840	+	ncbi_105391093	286494	294530	+	DOWNSTREAM	3332	LOC105391093	ubiquitin carboxyl-terminal hydrolase 43-like	-	-	-	-	-	-	-
MSTRG.35698.2	NW_011952327.1	392966	394144	-	ncbi_105391095	341349	383993	+	DOWNSTREAM	8972	LOC105391095	uncharacterized LOC105391095	-	-	-	-	-	-	-
MSTRG.35709.4	NW_011952328.1	163905	166749	+	ncbi_105391102	170514	171751	-	DOWNSTREAM	3764	LOC105391102	uncharacterized LOC105391102	-	-	-	-	-	-	-
MSTRG.35744.1	NW_011952329.1	11483	78416	-	ncbi_105391117	10	2735	-	UPSTREAM	8747	LOC105391117	RNA-binding protein 25-like	Genetic Information Processing	Transcription	ko03040//Spliceosome	K12822	-	-	-
MSTRG.35744.1	NW_011952329.1	11483	78416	-	ncbi_105391115	78982	89802	+	UPSTREAM	565	LOC105391115	IWS1-like protein	-	-	-	-	-	-	-
MSTRG.35970.1	NW_011952333.1	273944	274940	-	ncbi_105391208	275141	346432	-	DOWNSTREAM	200	LOC105391208	vacuolar protein sorting-associated protein 13A	-	-	-	-	-	-	-
MSTRG.36074.1	NW_011952335.1	76551	79984	+	ncbi_105391264	89001	93583	-	DOWNSTREAM	9016	LOC105391264	uncharacterized LOC105391264	-	-	-	-	-	-	-
MSTRG.36116.2	NW_011952336.1	35916	69148	-	ncbi_105391272	78198	78907	-	DOWNSTREAM	9049	LOC105391272	cuticle protein 16.5	-	-	-	-	-	-	-
MSTRG.36135.1	NW_011952336.1	136759	139746	-	ncbi_105391294	127983	134484	+	DOWNSTREAM	2274	LOC105391294	SHC-transforming protein 2	-	-	-	-	-	-	-
MSTRG.36160.2	NW_011952336.1	252955	255359	+	ncbi_105391296	241229	248625	-	UPSTREAM	4329	LOC105391296	uncharacterized LOC105391296	-	-	-	-	-	-	-
MSTRG.36160.2	NW_011952336.1	252955	255359	+	MSTRG.36162	256780	262468	-	DOWNSTREAM	1420	--	PREDICTED: myosin-9-like [Plutella xylostella]	-	-	-	-	-	-	-
MSTRG.36172.1	NW_011952336.1	289651	290628	+	ncbi_105391282	295107	298667	+	UPSTREAM	4478	LOC105391282	rab11 family-interacting protein 2	Cellular Processes	Transport and catabolism	ko04144//Endocytosis	K12484	-	-	-
MSTRG.36266.1	NW_011952338.1	141673	144409	+	MSTRG.36264	129226	139729	-	UPSTREAM	1943	TY3B-I	Transposon Ty3-G Gag-Pol polyprotein [Papilio machaon]	-	-	-	-	-	-	-
MSTRG.36297.3	NW_011952339.1	11675	67927	+	ncbi_105391348	68771	75626	-	DOWNSTREAM	843	LOC105391348	sphingomyelin synthase-related 1-like	-	-	-	-	-	-	-
MSTRG.36297.3	NW_011952339.1	11675	67927	+	ncbi_105391351	76419	114732	-	DOWNSTREAM	8491	LOC105391351	poly [ADP-ribose] polymerase-like	Genetic Information Processing	Replication and repair	ko03410//Base excision repair	K10798	-	-	-
MSTRG.36309.1	NW_011952339.1	180489	181168	+	ncbi_105391353	182895	189105	+	UPSTREAM	1726	LOC105391353	uncharacterized LOC105391353	-	-	-	-	-	-	-
MSTRG.36333.1	NW_011952340.1	80153	83232	-	ncbi_105391366	89622	90413	+	UPSTREAM	6389	LOC105391366	uncharacterized LOC105391366	Genetic Information Processing	Replication and repair	ko03460//Fanconi anemia pathway	K15365	-	-	-
MSTRG.36357.1	NW_011952340.1	245158	246501	+	MSTRG.36358	247553	257559	-	DOWNSTREAM	1051	FASN	PREDICTED: fatty acid synthase-like [Plutella xylostella]	Metabolism;Metabolism;Metabolism;Environmental Information Processing;Organismal Systems	Global and overview maps;Global and overview maps;Lipid metabolism;Signal transduction;Endocrine system	ko01100//Metabolic pathways;ko01212//Fatty acid metabolism;ko00061//Fatty acid biosynthesis;ko04152//AMPK signaling pathway;ko04910//Insulin signaling pathway	K00665;K00665;K00665;K00665;K00665	-	GO:0016787//hydrolase activity	GO:0044710//single-organism metabolic process
MSTRG.36359.1	NW_011952340.1	247558	257547	+	MSTRG.36356	245151	247229	-	UPSTREAM	328	Fasn	PREDICTED: fatty acid synthase-like [Plutella xylostella]	Metabolism;Metabolism;Metabolism;Environmental Information Processing;Organismal Systems	Global and overview maps;Global and overview maps;Lipid metabolism;Signal transduction;Endocrine system	ko01100//Metabolic pathways;ko01212//Fatty acid metabolism;ko00061//Fatty acid biosynthesis;ko04152//AMPK signaling pathway;ko04910//Insulin signaling pathway	K00665;K00665;K00665;K00665;K00665	-	GO:0016787//hydrolase activity	GO:0044710//single-organism metabolic process
MSTRG.36359.1	NW_011952340.1	247558	257547	+	MSTRG.36360	258493	276536	-	DOWNSTREAM	945	FASN	PREDICTED: fatty acid synthase-like [Plutella xylostella]	Metabolism;Metabolism;Metabolism;Environmental Information Processing;Organismal Systems	Global and overview maps;Global and overview maps;Lipid metabolism;Signal transduction;Endocrine system	ko01100//Metabolic pathways;ko01212//Fatty acid metabolism;ko00061//Fatty acid biosynthesis;ko04152//AMPK signaling pathway;ko04910//Insulin signaling pathway	K00665;K00665;K00665;K00665;K00665	-	GO:0016787//hydrolase activity;GO:0046914//transition metal ion binding	GO:0044710//single-organism metabolic process
MSTRG.36359.1	NW_011952340.1	247558	257547	+	MSTRG.36361	258513	276591	+	UPSTREAM	965	FASN	PREDICTED: fatty acid synthase-like [Plutella xylostella]	Metabolism;Metabolism;Metabolism;Environmental Information Processing;Organismal Systems	Global and overview maps;Global and overview maps;Lipid metabolism;Signal transduction;Endocrine system	ko01100//Metabolic pathways;ko01212//Fatty acid metabolism;ko00061//Fatty acid biosynthesis;ko04152//AMPK signaling pathway;ko04910//Insulin signaling pathway	K00665;K00665;K00665;K00665;K00665	-	GO:0016787//hydrolase activity;GO:0046914//transition metal ion binding	GO:0044710//single-organism metabolic process
MSTRG.36393.1	NW_011952341.1	143247	146527	-	ncbi_105391388	153398	155133	-	DOWNSTREAM	6870	LOC105391388	tumor susceptibility gene 101 protein	Cellular Processes	Transport and catabolism	ko04144//Endocytosis	K12183	-	-	-
MSTRG.36481.1	NW_011952343.1	13393	14789	-	ncbi_105391443	22734	61733	+	UPSTREAM	7944	LOC105391443	midasin-like	Genetic Information Processing	Translation	ko03008//Ribosome biogenesis in eukaryotes	K14572	-	-	-
MSTRG.36483.1	NW_011952343.1	14662	15344	+	ncbi_105391443	22734	61733	+	UPSTREAM	7389	LOC105391443	midasin-like	Genetic Information Processing	Translation	ko03008//Ribosome biogenesis in eukaryotes	K14572	-	-	-
MSTRG.36497.1	NW_011952343.1	82693	87801	-	ncbi_105391431	72521	74277	+	DOWNSTREAM	8415	LOC105391431	ribonuclease kappa-B-like	-	-	-	-	-	-	-
MSTRG.36497.1	NW_011952343.1	82693	87801	-	ncbi_105391432	75810	78771	-	UPSTREAM	3921	LOC105391432	testis-specific serine/threonine-protein kinase 3	-	-	-	-	-	GO:0004674//protein serine/threonine kinase activity;GO:0032550//purine ribonucleoside binding	GO:0006464//cellular protein modification process;GO:0006796//phosphate-containing compound metabolic process
MSTRG.36575.1	NW_011952344.1	349087	356244	+	ncbi_105391460	360216	361230	-	DOWNSTREAM	3971	LOC105391460	uncharacterized LOC105391460	-	-	-	-	-	-	-
MSTRG.36576.1	NW_011952344.1	352823	354399	-	ncbi_105391460	360216	361230	-	DOWNSTREAM	5816	LOC105391460	uncharacterized LOC105391460	-	-	-	-	-	-	-
MSTRG.36674.1	NW_011952346.1	299071	317410	+	ncbi_105391511	280498	290102	+	DOWNSTREAM	8968	LOC105391511	serine/arginine repetitive matrix protein 1-like	-	-	-	-	-	-	-
MSTRG.36674.1	NW_011952346.1	299071	317410	+	ncbi_105391510	290195	292532	-	UPSTREAM	6538	LOC105391510	peroxisomal membrane protein 2	Cellular Processes	Transport and catabolism	ko04146//Peroxisome	K13347	-	-	-
MSTRG.36674.1	NW_011952346.1	299071	317410	+	ncbi_105391515	296490	297894	+	DOWNSTREAM	1176	LOC105391515	thioredoxin domain-containing protein 17-like	-	-	-	-	-	-	-
MSTRG.36674.1	NW_011952346.1	299071	317410	+	ncbi_105391514	293571	296118	-	UPSTREAM	2952	LOC105391514	uncharacterized LOC105391514	-	-	-	-	-	-	-
MSTRG.36696.1	NW_011952347.1	116859	118546	-	ncbi_105391528	105746	107474	+	DOWNSTREAM	9384	LOC105391528	uncharacterized LOC105391528	-	-	-	-	-	-	-
MSTRG.36696.1	NW_011952347.1	116859	118546	-	ncbi_105391529	109507	113722	+	DOWNSTREAM	3136	LOC105391529	uncharacterized LOC105391529	-	-	-	-	-	-	-
MSTRG.36719.1	NW_011952347.1	322668	323338	+	ncbi_105391538	330912	334445	-	DOWNSTREAM	7573	LOC105391538	protein lifeguard 1-like	-	-	-	-	GO:0031224//intrinsic component of membrane	-	-
XR_960941.1	NW_011952347.1	336008	347466	-	ncbi_105391538	330912	334445	-	UPSTREAM	1562	LOC105391538	protein lifeguard 1-like	-	-	-	-	GO:0031224//intrinsic component of membrane	-	-
XR_960941.1	NW_011952347.1	336008	347466	-	ncbi_105391540	347857	348810	+	UPSTREAM	390	LOC105391540	39S ribosomal protein L52	-	-	-	-	-	-	-
XR_960941.1	NW_011952347.1	336008	347466	-	ncbi_105391541	349137	365164	-	DOWNSTREAM	1670	LOC105391541	multidrug resistance protein homolog 49-like	Environmental Information Processing	Membrane transport	ko02010//ABC transporters	K05658	-	-	-
MSTRG.36774.1	NW_011952349.1	17518	23960	+	ncbi_105391561	33625	48024	-	DOWNSTREAM	9664	LOC105391561	rhomboid-related protein 2-like	-	-	-	-	-	-	-
MSTRG.36775.1	NW_011952349.1	30454	31702	+	ncbi_105391561	33625	48024	-	DOWNSTREAM	1922	LOC105391561	rhomboid-related protein 2-like	-	-	-	-	-	-	-
MSTRG.36775.1	NW_011952349.1	30454	31702	+	ncbi_105391572	4	30223	+	DOWNSTREAM	230	LOC105391572	protein strawberry notch-like	-	-	-	-	-	-	-
MSTRG.36780.1	NW_011952349.1	75946	77469	-	ncbi_105391573	48454	67571	+	DOWNSTREAM	8374	LOC105391573	uncharacterized LOC105391573	-	-	-	-	-	-	-
MSTRG.36780.1	NW_011952349.1	75946	77469	-	ncbi_105391574	84361	102643	-	DOWNSTREAM	6891	LOC105391574	carboxypeptidase D-like	-	-	-	-	-	-	-
MSTRG.36828.1	NW_011952350.1	6656	7851	+	ncbi_105391594	10616	14844	-	DOWNSTREAM	2764	LOC105391594	uncharacterized LOC105391594	-	-	-	-	-	-	-
MSTRG.36831.1	NW_011952350.1	16367	23245	+	ncbi_105391594	10616	14844	-	UPSTREAM	1522	LOC105391594	uncharacterized LOC105391594	-	-	-	-	-	-	-
MSTRG.36863.1	NW_011952350.1	257896	258478	+	ncbi_105391598	241639	257459	+	DOWNSTREAM	436	LOC105391598	uncharacterized LOC105391598	-	-	-	-	-	-	-
MSTRG.36904.1	NW_011952351.1	199839	201379	+	ncbi_105391616	181455	199037	+	DOWNSTREAM	801	LOC105391616	tyrosine-protein phosphatase 69D-like	-	-	-	-	-	-	-
MSTRG.36904.1	NW_011952351.1	199839	201379	+	ncbi_105391618	208190	223208	-	DOWNSTREAM	6810	LOC105391618	probable E3 ubiquitin-protein ligase HERC2	Genetic Information Processing	Folding, sorting and degradation	ko04120//Ubiquitin mediated proteolysis	K10595	-	-	-
MSTRG.36948.2	NW_011952352.1	108896	110436	+	ncbi_105391642	118040	176998	+	UPSTREAM	7603	LOC105391642	unconventional myosin-VIIa-like	-	-	-	-	-	-	-
MSTRG.36996.1	NW_011952352.1	368203	369270	-	ncbi_105391646	352736	358657	-	UPSTREAM	9545	LOC105391646	G2/M phase-specific E3 ubiquitin-protein ligase-like	-	-	-	-	-	-	-
MSTRG.37250.2	NW_011952357.1	289444	290989	+	ncbi_105391742	294927	297637	-	DOWNSTREAM	3937	LOC105391742	uncharacterized LOC105391742	-	-	-	-	-	-	-
MSTRG.37293.1	NW_011952358.1	188480	222511	+	MSTRG.37303	230741	240476	+	UPSTREAM	8229	--	Replicase large subunit [Operophtera brumata]	-	-	-	-	-	-	-
MSTRG.37293.2	NW_011952358.1	205931	208444	+	MSTRG.37298	211504	213595	-	DOWNSTREAM	3059	pol	reverse transcriptase [Drosophila melanogaster]	-	-	-	-	-	GO:0016779//nucleotidyltransferase activity	GO:0006259//DNA metabolic process
MSTRG.37297.1	NW_011952358.1	206484	221337	-	MSTRG.37303	230741	240476	+	UPSTREAM	9403	--	Replicase large subunit [Operophtera brumata]	-	-	-	-	-	-	-
MSTRG.37301.1	NW_011952358.1	225947	230615	+	MSTRG.37303	230741	240476	+	UPSTREAM	125	--	Replicase large subunit [Operophtera brumata]	-	-	-	-	-	-	-
MSTRG.37305.2	NW_011952358.1	244456	247230	+	MSTRG.37303	230741	240476	+	DOWNSTREAM	3979	--	Replicase large subunit [Operophtera brumata]	-	-	-	-	-	-	-
MSTRG.37305.3	NW_011952358.1	247971	250304	+	MSTRG.37303	230741	240476	+	DOWNSTREAM	7494	--	Replicase large subunit [Operophtera brumata]	-	-	-	-	-	-	-
MSTRG.37305.4	NW_011952358.1	247972	250501	+	MSTRG.37303	230741	240476	+	DOWNSTREAM	7495	--	Replicase large subunit [Operophtera brumata]	-	-	-	-	-	-	-
MSTRG.37457.1	NW_011952362.1	11843	49693	-	ncbi_105391802	54364	55322	+	UPSTREAM	4670	LOC105391802	uncharacterized LOC105391802	-	-	-	-	-	-	-
MSTRG.37457.1	NW_011952362.1	11843	49693	-	ncbi_105391803	55500	56592	+	UPSTREAM	5806	LOC105391803	ankyrin repeat domain-containing protein 39	-	-	-	-	-	-	-
XR_960945.1	NW_011952362.1	70608	73311	-	ncbi_105391815	77394	79742	-	DOWNSTREAM	4082	LOC105391815	activating molecule in BECN1-regulated autophagy protein 1-like	-	-	-	-	-	-	-
MSTRG.37479.1	NW_011952362.1	139244	141341	+	MSTRG.37476	119298	130779	+	DOWNSTREAM	8464	--	-	-	-	-	-	-	-	-
MSTRG.37480.1	NW_011952362.1	139258	141282	-	MSTRG.37476	119298	130779	+	DOWNSTREAM	8478	--	-	-	-	-	-	-	-	-
MSTRG.37623.1	NW_011952365.1	97043	99090	-	ncbi_105391865	74070	92256	+	DOWNSTREAM	4786	LOC105391865	116 kDa U5 small nuclear ribonucleoprotein component	Genetic Information Processing	Transcription	ko03040//Spliceosome	K12852	GO:0032991//macromolecular complex;GO:0044423//virion part	GO:0017111//nucleoside-triphosphatase activity;GO:0032550//purine ribonucleoside binding	-
MSTRG.37645.1	NW_011952365.1	296114	303510	-	ncbi_105391862	306055	318714	-	DOWNSTREAM	2544	LOC105391862	nuclear pore complex protein Nup205-like	Genetic Information Processing	Translation	ko03013//RNA transport	K14310	-	-	-
MSTRG.37795.2	NW_011952369.1	59150	61832	-	ncbi_105391920	47977	57690	-	UPSTREAM	1459	LOC105391920	uncharacterized LOC105391920	-	-	-	-	-	-	-
MSTRG.37842.1	NW_011952370.1	115290	181459	+	ncbi_105391937	109369	111604	+	DOWNSTREAM	3685	LOC105391937	H/ACA ribonucleoprotein complex subunit 4-like	Genetic Information Processing	Translation	ko03008//Ribosome biogenesis in eukaryotes	K11131	GO:0032991//macromolecular complex;GO:0044423//virion part	GO:0003676//nucleic acid binding;GO:0016866//intramolecular transferase activity	GO:0010467//gene expression;GO:0016070//RNA metabolic process
MSTRG.37888.1	NW_011952371.1	140621	142064	-	ncbi_105391967	143319	144284	-	DOWNSTREAM	1254	LOC105391967	bile salt-activated lipase-like	-	-	-	-	-	-	-
MSTRG.37888.1	NW_011952371.1	140621	142064	-	ncbi_105391968	144371	145525	-	DOWNSTREAM	2306	LOC105391968	cholinesterase-like	-	-	-	-	-	-	-
MSTRG.37888.1	NW_011952371.1	140621	142064	-	ncbi_105391965	124285	137837	+	DOWNSTREAM	2783	LOC105391965	protein unc-79 homolog	-	-	-	-	-	-	-
MSTRG.37921.1	NW_011952372.1	18482	19919	+	ncbi_105391989	9	18078	+	DOWNSTREAM	403	LOC105391989	protein BCL9 homolog	-	-	-	-	-	-	-
MSTRG.37921.1	NW_011952372.1	18482	19919	+	ncbi_105391991	20832	34727	+	UPSTREAM	912	LOC105391991	CCR4-NOT transcription complex subunit 4-like	Genetic Information Processing	Folding, sorting and degradation	ko03018//RNA degradation	K10643	-	-	-
MSTRG.37932.3	NW_011952372.1	83590	84773	-	ncbi_105391977	92234	95595	-	DOWNSTREAM	7460	LOC105391977	putative deoxyribonuclease TATDN1	-	-	-	-	-	-	-
MSTRG.37954.1	NW_011952372.1	206471	207826	-	ncbi_105391985	202851	203551	+	DOWNSTREAM	2919	LOC105391985	uncharacterized LOC105391985	-	-	-	-	-	-	-
MSTRG.37954.1	NW_011952372.1	206471	207826	-	ncbi_105391986	208434	211035	-	DOWNSTREAM	607	LOC105391986	BAG family molecular chaperone regulator 2-like	Genetic Information Processing	Folding, sorting and degradation	ko04141//Protein processing in endoplasmic reticulum	K09556	-	-	-
XR_960965.1	NW_011952377.1	143258	144370	-	ncbi_105392062	153519	158126	-	DOWNSTREAM	9148	LOC105392062	acyl-CoA Delta(11) desaturase-like	Metabolism;Metabolism	Global and overview maps;Lipid metabolism	ko01212//Fatty acid metabolism;ko01040//Biosynthesis of unsaturated fatty acids	K00507;K00507	-	-	-
XR_960965.1	NW_011952377.1	143258	144370	-	MSTRG.38143	146573	148077	-	DOWNSTREAM	2202	--	hypothetical protein RR46_12225 [Papilio xuthus]	-	-	-	-	-	-	-
XR_960965.1	NW_011952377.1	143258	144370	-	MSTRG.38144	146573	148190	+	UPSTREAM	2202	--	hypothetical protein RR46_12225 [Papilio xuthus]	-	-	-	-	-	-	-
XR_960965.1	NW_011952377.1	143258	144370	-	ncbi_105392058	129882	141375	-	UPSTREAM	1882	LOC105392058	pyridoxal kinase-like	Metabolism;Metabolism	Global and overview maps;Metabolism of cofactors and vitamins	ko01100//Metabolic pathways;ko00750//Vitamin B6 metabolism	K00868;K00868	-	GO:0016772//transferase activity, transferring phosphorus-containing groups	GO:0042823//pyridoxal phosphate biosynthetic process
MSTRG.38141.2	NW_011952377.1	144727	146266	+	ncbi_105392062	153519	158126	-	DOWNSTREAM	7252	LOC105392062	acyl-CoA Delta(11) desaturase-like	Metabolism;Metabolism	Global and overview maps;Lipid metabolism	ko01212//Fatty acid metabolism;ko01040//Biosynthesis of unsaturated fatty acids	K00507;K00507	-	-	-
MSTRG.38141.2	NW_011952377.1	144727	146266	+	MSTRG.38143	146573	148077	-	DOWNSTREAM	306	--	hypothetical protein RR46_12225 [Papilio xuthus]	-	-	-	-	-	-	-
MSTRG.38141.2	NW_011952377.1	144727	146266	+	MSTRG.38144	146573	148190	+	UPSTREAM	306	--	hypothetical protein RR46_12225 [Papilio xuthus]	-	-	-	-	-	-	-
MSTRG.38141.2	NW_011952377.1	144727	146266	+	ncbi_105392058	129882	141375	-	UPSTREAM	3351	LOC105392058	pyridoxal kinase-like	Metabolism;Metabolism	Global and overview maps;Metabolism of cofactors and vitamins	ko01100//Metabolic pathways;ko00750//Vitamin B6 metabolism	K00868;K00868	-	GO:0016772//transferase activity, transferring phosphorus-containing groups	GO:0042823//pyridoxal phosphate biosynthetic process
MSTRG.38190.1	NW_011952378.1	212843	214202	-	ncbi_105392072	214626	219313	-	DOWNSTREAM	423	LOC105392072	uncharacterized LOC105392072	-	-	-	-	-	-	-
MSTRG.38198.1	NW_011952378.1	256172	263305	-	ncbi_105392075	263953	267864	-	DOWNSTREAM	647	LOC105392075	nucleolar and coiled-body phosphoprotein 1-like	-	-	-	-	-	-	-
MSTRG.38198.1	NW_011952378.1	256172	263305	-	ncbi_105392091	268264	272161	-	DOWNSTREAM	4958	LOC105392091	WW domain-binding protein 2	-	-	-	-	-	-	-
MSTRG.38202.1	NW_011952378.1	263957	267889	+	ncbi_105392074	245937	256175	+	DOWNSTREAM	7781	LOC105392074	thyroglobulin-like	-	-	-	-	-	-	-
MSTRG.38202.1	NW_011952378.1	263957	267889	+	ncbi_105392091	268264	272161	-	DOWNSTREAM	374	LOC105392091	WW domain-binding protein 2	-	-	-	-	-	-	-
MSTRG.38202.1	NW_011952378.1	263957	267889	+	ncbi_105392077	273679	279567	+	UPSTREAM	5789	LOC105392077	mismatch repair endonuclease PMS2	Genetic Information Processing;Genetic Information Processing	Replication and repair;Replication and repair	ko03460//Fanconi anemia pathway;ko03430//Mismatch repair	K10858;K10858	-	-	-
MSTRG.38225.2	NW_011952379.1	73328	74883	+	ncbi_105392094	69498	70735	+	DOWNSTREAM	2592	LOC105392094	cytochrome c oxidase subunit 6A1	Metabolism;Metabolism	Global and overview maps;Energy metabolism	ko01100//Metabolic pathways;ko00190//Oxidative phosphorylation	K02266;K02266	GO:0019866//organelle inner membrane;GO:0031966//mitochondrial membrane	-	-
MSTRG.38225.2	NW_011952379.1	73328	74883	+	ncbi_105392105	3011	63935	+	DOWNSTREAM	9392	LOC105392105	putative serine/threonine-protein kinase F31E3.2	-	-	-	-	-	-	-
MSTRG.38292.1	NW_011952380.1	238793	239784	+	ncbi_105392119	233267	238024	-	UPSTREAM	768	LOC105392119	allantoicase-like	Metabolism;Metabolism;Metabolism	Global and overview maps;Global and overview maps;Nucleotide metabolism	ko01100//Metabolic pathways;ko01120//Microbial metabolism in diverse environments;ko00230//Purine metabolism	K01477;K01477;K01477	-	-	-
MSTRG.38314.1	NW_011952381.1	101924	103509	+	ncbi_105392142	110380	190375	+	UPSTREAM	6870	LOC105392142	high affinity cAMP-specific and IBMX-insensitive 3'	Metabolism	Nucleotide metabolism	ko00230//Purine metabolism	K18437	-	-	-
MSTRG.38334.3	NW_011952381.1	245981	253514	-	ncbi_105392144	253674	269173	-	DOWNSTREAM	159	LOC105392144	rabankyrin-5-like	-	-	-	-	-	-	-
MSTRG.38414.2	NW_011952383.1	193355	196470	-	ncbi_105392166	196912	198829	-	DOWNSTREAM	441	LOC105392166	cytoplasmic tRNA 2-thiolation protein 1-like	Genetic Information Processing	Folding, sorting and degradation	ko04122//Sulfur relay system	K14168	GO:0044444//cytoplasmic part	-	GO:0002097//tRNA wobble base modification
MSTRG.38414.2	NW_011952383.1	193355	196470	-	ncbi_105392172	199520	223119	+	UPSTREAM	3049	LOC105392172	protein melted-like	-	-	-	-	-	-	-
MSTRG.38420.1	NW_011952383.1	208115	216431	-	ncbi_105392166	196912	198829	-	UPSTREAM	9285	LOC105392166	cytoplasmic tRNA 2-thiolation protein 1-like	Genetic Information Processing	Folding, sorting and degradation	ko04122//Sulfur relay system	K14168	GO:0044444//cytoplasmic part	-	GO:0002097//tRNA wobble base modification
MSTRG.38472.1	NW_011952384.1	320494	322263	+	ncbi_105392185	316303	319163	+	DOWNSTREAM	1330	LOC105392185	glucose dehydrogenase [FAD	Metabolism;Metabolism	Global and overview maps;Amino acid metabolism	ko01100//Metabolic pathways;ko00260//Glycine, serine and threonine metabolism	K00108;K00108	-	-	-
MSTRG.38472.3	NW_011952384.1	321534	322263	+	ncbi_105392185	316303	319163	+	DOWNSTREAM	2370	LOC105392185	glucose dehydrogenase [FAD	Metabolism;Metabolism	Global and overview maps;Amino acid metabolism	ko01100//Metabolic pathways;ko00260//Glycine, serine and threonine metabolism	K00108;K00108	-	-	-
MSTRG.38482.1	NW_011952385.1	71469	72813	+	ncbi_105392197	60373	63271	-	UPSTREAM	8197	LOC105392197	trypsin	Environmental Information Processing	Signaling molecules and interaction	ko04080//Neuroactive ligand-receptor interaction	K01312	-	-	-
MSTRG.38482.1	NW_011952385.1	71469	72813	+	ncbi_105392199	68547	70882	-	UPSTREAM	586	LOC105392199	trypsin	Environmental Information Processing	Signaling molecules and interaction	ko04080//Neuroactive ligand-receptor interaction	K01312	-	-	-
MSTRG.38482.1	NW_011952385.1	71469	72813	+	ncbi_105392198	64430	66661	-	UPSTREAM	4807	LOC105392198	trypsin	Environmental Information Processing	Signaling molecules and interaction	ko04080//Neuroactive ligand-receptor interaction	K01312	-	-	-
MSTRG.38506.1	NW_011952385.1	238058	238750	-	ncbi_105392207	230608	232222	-	UPSTREAM	5835	LOC105392207	uncharacterized LOC105392207	-	-	-	-	-	-	-
MSTRG.38506.1	NW_011952385.1	238058	238750	-	MSTRG.38509	242311	243425	-	DOWNSTREAM	3560	--	-	-	-	-	-	-	-	-
MSTRG.38510.1	NW_011952385.1	242311	243370	+	MSTRG.38511	253287	254397	-	DOWNSTREAM	9916	--	-	-	-	-	-	-	-	-
MSTRG.38512.1	NW_011952385.1	253287	254339	+	MSTRG.38509	242311	243425	-	UPSTREAM	9861	--	-	-	-	-	-	-	-	-
MSTRG.38512.1	NW_011952385.1	253287	254339	+	ncbi_105392223	258555	283916	+	UPSTREAM	4215	LOC105392223	uncharacterized LOC105392223	-	-	-	-	-	-	-
MSTRG.38516.1	NW_011952385.1	275116	280496	+	ncbi_105392211	267534	271079	+	DOWNSTREAM	4036	LOC105392211	putative nuclease HARBI1	-	-	-	-	-	-	-
MSTRG.38516.1	NW_011952385.1	275116	280496	+	ncbi_105392225	284250	287651	-	DOWNSTREAM	3753	LOC105392225	pre-mRNA-splicing factor CWC25 homolog	-	-	-	-	-	-	-
MSTRG.38688.2	NW_011952390.1	44572	46853	+	ncbi_105392299	55069	61106	+	UPSTREAM	8215	LOC105392299	uncharacterized LOC105392299	Metabolism;Metabolism;Metabolism;Metabolism;Metabolism;Metabolism	Global and overview maps;Global and overview maps;Global and overview maps;Global and overview maps;Global and overview maps;Amino acid metabolism	ko01100//Metabolic pathways;ko01110//Biosynthesis of secondary metabolites;ko01130//Biosynthesis of antibiotics;ko01230//Biosynthesis of amino acids;ko01210//2-Oxocarboxylic acid metabolism;ko00220//Arginine biosynthesis	K14677;K14677;K14677;K14677;K14677;K14677	-	-	-
MSTRG.38729.3	NW_011952391.1	36990	38645	+	ncbi_105392312	44994	77802	+	UPSTREAM	6348	LOC105392312	eukaryotic translation initiation factor 5-like	Genetic Information Processing	Translation	ko03013//RNA transport	K03262	-	-	-
MSTRG.38729.4	NW_011952391.1	37380	38645	+	ncbi_105392312	44994	77802	+	UPSTREAM	6348	LOC105392312	eukaryotic translation initiation factor 5-like	Genetic Information Processing	Translation	ko03013//RNA transport	K03262	-	-	-
MSTRG.38823.3	NW_011952392.1	285679	291917	-	ncbi_105392347	276164	281097	+	DOWNSTREAM	4581	LOC105392347	centromere/kinetochore protein zw10	-	-	-	-	-	-	-
MSTRG.38823.3	NW_011952392.1	285679	291917	-	ncbi_105392348	292251	295078	+	UPSTREAM	333	LOC105392348	uncharacterized LOC105392348	-	-	-	-	-	-	-
MSTRG.38826.1	NW_011952392.1	297809	304606	+	ncbi_105392368	284174	291917	-	UPSTREAM	5891	LOC105392368	WD repeat domain phosphoinositide-interacting protein 4-like	-	-	-	-	-	-	-
MSTRG.38826.1	NW_011952392.1	297809	304606	+	ncbi_105392348	292251	295078	+	DOWNSTREAM	2730	LOC105392348	uncharacterized LOC105392348	-	-	-	-	-	-	-
MSTRG.38828.2	NW_011952392.1	308930	309814	+	ncbi_105392369	318907	321605	-	DOWNSTREAM	9092	LOC105392369	alpha-N-acetylgalactosaminidase-like	Cellular Processes;Metabolism	Transport and catabolism;Glycan biosynthesis and metabolism	ko04142//Lysosome;ko00603//Glycosphingolipid biosynthesis - globo and isoglobo series	K01204;K01204	-	-	-
MSTRG.38861.1	NW_011952393.1	275355	277745	+	ncbi_105392378	280688	306028	+	UPSTREAM	2942	LOC105392378	apolipophorins-like	-	-	-	-	-	-	-
MSTRG.38878.2	NW_011952394.1	87978	88914	+	ncbi_105392380	62970	83168	+	DOWNSTREAM	4809	LOC105392380	uncharacterized LOC105392380	-	-	-	-	-	-	-
MSTRG.38878.1	NW_011952394.1	87978	89688	+	ncbi_105392380	62970	83168	+	DOWNSTREAM	4809	LOC105392380	uncharacterized LOC105392380	-	-	-	-	-	-	-
MSTRG.38889.1	NW_011952394.1	178281	181227	-	ncbi_105392384	162318	174997	+	DOWNSTREAM	3283	LOC105392384	CUE domain-containing protein 2	-	-	-	-	-	-	-
MSTRG.38889.1	NW_011952394.1	178281	181227	-	ncbi_105392386	184839	198459	-	DOWNSTREAM	3611	LOC105392386	transcriptional repressor protein YY1-like	-	-	-	-	-	GO:0043169//cation binding	-
MSTRG.38938.2	NW_011952395.1	229339	231368	-	ncbi_105392397	199739	227992	+	DOWNSTREAM	1346	LOC105392397	uncharacterized LOC105392397	-	-	-	-	-	-	-
MSTRG.39009.1	NW_011952398.1	8354	9478	-	ncbi_105392435	19377	56329	+	UPSTREAM	9898	LOC105392435	uncharacterized LOC105392435	Metabolism	Amino acid metabolism	ko00310//Lysine degradation	K11421	-	-	-
MSTRG.39049.5	NW_011952399.1	6846	8853	+	ncbi_105392441	9679	10973	-	DOWNSTREAM	825	LOC105392441	uncharacterized LOC105392441	-	-	-	-	-	-	-
MSTRG.39050.2	NW_011952399.1	8024	8907	-	ncbi_105392441	9679	10973	-	DOWNSTREAM	771	LOC105392441	uncharacterized LOC105392441	-	-	-	-	-	-	-
MSTRG.39119.1	NW_011952401.1	73548	75005	-	ncbi_105392474	84541	87183	-	DOWNSTREAM	9535	LOC105392474	esterase E4-like	-	-	-	-	-	-	-
MSTRG.39122.1	NW_011952401.1	87640	91617	-	ncbi_105392474	84541	87183	-	UPSTREAM	456	LOC105392474	esterase E4-like	-	-	-	-	-	-	-
MSTRG.39122.1	NW_011952401.1	87640	91617	-	ncbi_105392473	51352	83587	+	DOWNSTREAM	4052	LOC105392473	protein CASC1-like	-	-	-	-	-	-	-
MSTRG.39124.1	NW_011952401.1	89308	91238	+	ncbi_105392474	84541	87183	-	UPSTREAM	2124	LOC105392474	esterase E4-like	-	-	-	-	-	-	-
MSTRG.39124.1	NW_011952401.1	89308	91238	+	ncbi_105392473	51352	83587	+	DOWNSTREAM	5720	LOC105392473	protein CASC1-like	-	-	-	-	-	-	-
MSTRG.39127.1	NW_011952401.1	127315	149404	-	ncbi_105392486	122587	124060	-	UPSTREAM	3254	LOC105392486	uncharacterized LOC105392486	-	-	-	-	-	-	-
MSTRG.39251.7	NW_011952404.1	165439	213812	-	ncbi_105392523	220281	237731	+	UPSTREAM	6468	LOC105392523	phospholipase D2	Metabolism;Metabolism;Cellular Processes;Metabolism;Metabolism	Global and overview maps;Global and overview maps;Transport and catabolism;Lipid metabolism;Lipid metabolism	ko01100//Metabolic pathways;ko01110//Biosynthesis of secondary metabolites;ko04144//Endocytosis;ko00564//Glycerophospholipid metabolism;ko00565//Ether lipid metabolism	K01115;K01115;K01115;K01115;K01115	-	-	-
MSTRG.39251.8	NW_011952404.1	165439	213812	-	ncbi_105392523	220281	237731	+	UPSTREAM	6468	LOC105392523	phospholipase D2	Metabolism;Metabolism;Cellular Processes;Metabolism;Metabolism	Global and overview maps;Global and overview maps;Transport and catabolism;Lipid metabolism;Lipid metabolism	ko01100//Metabolic pathways;ko01110//Biosynthesis of secondary metabolites;ko04144//Endocytosis;ko00564//Glycerophospholipid metabolism;ko00565//Ether lipid metabolism	K01115;K01115;K01115;K01115;K01115	-	-	-
MSTRG.39281.1	NW_011952405.1	133116	136062	+	ncbi_105392535	136458	140039	-	DOWNSTREAM	395	LOC105392535	uncharacterized LOC105392535	-	-	-	-	-	-	-
MSTRG.39281.1	NW_011952405.1	133116	136062	+	ncbi_105392548	142558	144227	+	UPSTREAM	6495	LOC105392548	asparagine synthetase [glutamine-hydrolyzing]	Metabolism;Metabolism;Metabolism	Global and overview maps;Global and overview maps;Amino acid metabolism	ko01100//Metabolic pathways;ko01110//Biosynthesis of secondary metabolites;ko00250//Alanine, aspartate and glutamate metabolism	K01953;K01953;K01953	-	GO:0016884//carbon-nitrogen ligase activity, with glutamine as amido-N-donor;GO:0032550//purine ribonucleoside binding	GO:0006529//asparagine biosynthetic process
MSTRG.39282.1	NW_011952405.1	133696	135413	-	ncbi_105392535	136458	140039	-	DOWNSTREAM	1044	LOC105392535	uncharacterized LOC105392535	-	-	-	-	-	-	-
MSTRG.39282.1	NW_011952405.1	133696	135413	-	ncbi_105392548	142558	144227	+	UPSTREAM	7144	LOC105392548	asparagine synthetase [glutamine-hydrolyzing]	Metabolism;Metabolism;Metabolism	Global and overview maps;Global and overview maps;Amino acid metabolism	ko01100//Metabolic pathways;ko01110//Biosynthesis of secondary metabolites;ko00250//Alanine, aspartate and glutamate metabolism	K01953;K01953;K01953	-	GO:0016884//carbon-nitrogen ligase activity, with glutamine as amido-N-donor;GO:0032550//purine ribonucleoside binding	GO:0006529//asparagine biosynthetic process
MSTRG.39367.1	NW_011952407.1	246574	249858	+	ncbi_105392564	242632	246393	+	DOWNSTREAM	180	LOC105392564	trypsin CFT-1-like	-	-	-	-	-	-	-
MSTRG.39575.2	NW_011952413.1	92484	97364	+	ncbi_105392649	98675	103370	-	DOWNSTREAM	1310	LOC105392649	15-hydroxyprostaglandin dehydrogenase [NAD(+)]-like	-	-	-	-	-	-	-
MSTRG.39575.2	NW_011952413.1	92484	97364	+	ncbi_105392650	103903	108761	-	DOWNSTREAM	6538	LOC105392650	kelch-like protein 10	-	-	-	-	-	-	-
MSTRG.39575.2	NW_011952413.1	92484	97364	+	ncbi_105392647	80213	89118	-	UPSTREAM	3365	LOC105392647	condensin complex subunit 2-like	-	-	-	-	-	-	-
MSTRG.39639.1	NW_011952414.1	97423	99382	-	ncbi_105392670	82032	90893	+	DOWNSTREAM	6529	LOC105392670	isocitrate dehydrogenase [NAD] subunit beta	Metabolism;Metabolism;Metabolism;Metabolism;Metabolism;Metabolism;Metabolism;Metabolism	Global and overview maps;Global and overview maps;Global and overview maps;Global and overview maps;Global and overview maps;Global and overview maps;Carbohydrate metabolism;Global and overview maps	ko01100//Metabolic pathways;ko01110//Biosynthesis of secondary metabolites;ko01130//Biosynthesis of antibiotics;ko01120//Microbial metabolism in diverse environments;ko01200//Carbon metabolism;ko01230//Biosynthesis of amino acids;ko00020//Citrate cycle (TCA cycle);ko01210//2-Oxocarboxylic acid metabolism	K00030;K00030;K00030;K00030;K00030;K00030;K00030;K00030	-	-	-
MSTRG.39639.1	NW_011952414.1	97423	99382	-	ncbi_105392671	90914	93114	-	UPSTREAM	4308	LOC105392671	uncharacterized LOC105392671	-	-	-	-	-	-	-
MSTRG.39663.2	NW_011952414.1	258734	260888	+	ncbi_105392685	269039	270233	+	UPSTREAM	8150	LOC105392685	putative nuclease HARBI1	-	-	-	-	-	-	-
MSTRG.39683.1	NW_011952415.1	112810	113905	-	ncbi_105392689	104009	111053	-	UPSTREAM	1756	LOC105392689	putative inorganic phosphate cotransporter	-	-	-	-	-	-	-
MSTRG.39853.1	NW_011952419.1	273342	274396	-	ncbi_105392752	284083	290030	-	DOWNSTREAM	9686	LOC105392752	trypsin-like	-	-	-	-	-	-	-
MSTRG.39918.1	NW_011952421.1	121387	121892	+	ncbi_105392788	88500	112947	-	UPSTREAM	8439	LOC105392788	nucleoredoxin-like	-	-	-	-	-	-	-
MSTRG.40045.3	NW_011952424.1	195231	202280	-	ncbi_105392851	209098	215979	-	DOWNSTREAM	6817	LOC105392851	DC-STAMP domain-containing protein 2-like	-	-	-	-	-	-	-
MSTRG.40109.1	NW_011952426.1	188312	191920	-	ncbi_105392879	177136	186977	-	UPSTREAM	1334	LOC105392879	monocarboxylate transporter 9-like	-	-	-	-	-	-	-
MSTRG.40121.1	NW_011952426.1	227383	228160	-	ncbi_105392874	217362	225679	+	DOWNSTREAM	1703	LOC105392874	uncharacterized LOC105392874	-	-	-	-	-	-	-
MSTRG.40130.1	NW_011952427.1	101409	102789	-	ncbi_105392881	109578	113682	+	UPSTREAM	6788	LOC105392881	uncharacterized LOC105392881	-	-	-	-	-	-	-
XR_960995.1	NW_011952430.1	90560	105713	-	ncbi_105392945	83629	89164	-	UPSTREAM	1395	LOC105392945	dihydrolipoyllysine-residue succinyltransferase component of 2-oxoglutarate dehydrogenase complex	Metabolism;Metabolism;Metabolism;Metabolism;Metabolism;Metabolism;Metabolism	Global and overview maps;Global and overview maps;Global and overview maps;Global and overview maps;Global and overview maps;Amino acid metabolism;Carbohydrate metabolism	ko01100//Metabolic pathways;ko01110//Biosynthesis of secondary metabolites;ko01130//Biosynthesis of antibiotics;ko01120//Microbial metabolism in diverse environments;ko01200//Carbon metabolism;ko00310//Lysine degradation;ko00020//Citrate cycle (TCA cycle)	K00658;K00658;K00658;K00658;K00658;K00658;K00658	-	-	-
XR_960995.1	NW_011952430.1	90560	105713	-	ncbi_105392938	77683	82475	-	UPSTREAM	8084	LOC105392938	NAD-dependent protein deacetylase sirtuin-2-like	-	-	-	-	-	-	-
MSTRG.40334.4	NW_011952432.1	148073	155414	-	ncbi_105392976	164550	194057	-	DOWNSTREAM	9135	LOC105392976	probable Rho GTPase-activating protein CG5521	-	-	-	-	-	-	-
MSTRG.40334.4	NW_011952432.1	148073	155414	-	ncbi_105392974	114935	140046	-	UPSTREAM	8026	LOC105392974	ubiquitin carboxyl-terminal hydrolase 34-like	-	-	-	-	-	-	-
MSTRG.40339.1	NW_011952432.1	195233	197276	-	ncbi_105392971	199062	200709	+	UPSTREAM	1785	LOC105392971	uncharacterized LOC105392971	-	-	-	-	-	-	-
MSTRG.40339.1	NW_011952432.1	195233	197276	-	ncbi_105392976	164550	194057	-	UPSTREAM	1175	LOC105392976	probable Rho GTPase-activating protein CG5521	-	-	-	-	-	-	-
MSTRG.40408.1	NW_011952434.1	225051	227047	+	ncbi_105393002	232139	237670	-	DOWNSTREAM	5091	LOC105393002	CUE domain-containing protein 2-like	-	-	-	-	-	-	-
MSTRG.40447.5	NW_011952435.1	233459	235196	+	ncbi_105393006	230040	232441	+	DOWNSTREAM	1017	LOC105393006	uncharacterized LOC105393006	-	-	-	-	-	-	-
MSTRG.40496.1	NW_011952437.1	48417	52551	-	ncbi_105393023	54229	74959	+	UPSTREAM	1677	LOC105393023	phosphoenolpyruvate carboxykinase [GTP]-like	Metabolism;Metabolism;Metabolism;Metabolism;Environmental Information Processing;Metabolism;Metabolism;Metabolism	Global and overview maps;Global and overview maps;Global and overview maps;Global and overview maps;Signal transduction;Carbohydrate metabolism;Carbohydrate metabolism;Carbohydrate metabolism	ko01100//Metabolic pathways;ko01110//Biosynthesis of secondary metabolites;ko01130//Biosynthesis of antibiotics;ko01120//Microbial metabolism in diverse environments;ko04068//FoxO signaling pathway;ko00620//Pyruvate metabolism;ko00010//Glycolysis / Gluconeogenesis;ko00020//Citrate cycle (TCA cycle)	K01596;K01596;K01596;K01596;K01596;K01596;K01596;K01596	-	GO:0000166//nucleotide binding;GO:0004611//phosphoenolpyruvate carboxykinase activity;GO:0032550//purine ribonucleoside binding	GO:0006006//glucose metabolic process
MSTRG.40612.3	NW_011952440.1	86754	94092	+	ncbi_105393064	103834	141780	-	DOWNSTREAM	9741	LOC105393064	protein FAM102A	-	-	-	-	-	-	-
MSTRG.40675.1	NW_011952442.1	47821	50238	-	ncbi_105393096	51644	108525	-	DOWNSTREAM	1405	LOC105393096	hemicentin-1-like	-	-	-	-	-	-	-
XR_961007.1	NW_011952443.1	131590	133078	+	ncbi_105393117	139364	148205	+	UPSTREAM	6285	LOC105393117	DNA (cytosine-5)-methyltransferase PliMCI-like	Metabolism;Metabolism	Global and overview maps;Amino acid metabolism	ko01100//Metabolic pathways;ko00270//Cysteine and methionine metabolism	K00558;K00558	GO:0043231//intracellular membrane-bounded organelle	GO:0008757//S-adenosylmethionine-dependent methyltransferase activity;GO:0046914//transition metal ion binding	GO:0032776//DNA methylation on cytosine
MSTRG.40740.1	NW_011952444.1	77792	111385	+	ncbi_105393130	31122	75284	+	DOWNSTREAM	2507	LOC105393130	disintegrin and metalloproteinase domain-containing protein 10-like	-	-	-	-	-	-	-
MSTRG.40740.2	NW_011952444.1	79760	112768	+	ncbi_105393130	31122	75284	+	DOWNSTREAM	4475	LOC105393130	disintegrin and metalloproteinase domain-containing protein 10-like	-	-	-	-	-	-	-
MSTRG.40813.2	NW_011952446.1	91300	91846	+	ncbi_105393146	86766	89270	+	DOWNSTREAM	2029	LOC105393146	putative riboflavin kinase	Metabolism;Metabolism;Metabolism	Global and overview maps;Global and overview maps;Metabolism of cofactors and vitamins	ko01100//Metabolic pathways;ko01110//Biosynthesis of secondary metabolites;ko00740//Riboflavin metabolism	K00861;K00861;K00861	-	-	GO:0044237//cellular metabolic process
MSTRG.40813.2	NW_011952446.1	91300	91846	+	ncbi_105393147	89465	90981	-	UPSTREAM	318	LOC105393147	40S ribosomal protein S27	Genetic Information Processing	Translation	ko03010//Ribosome	K02978	GO:0030529//intracellular ribonucleoprotein complex	GO:0043169//cation binding	GO:0010467//gene expression
MSTRG.40813.2	NW_011952446.1	91300	91846	+	ncbi_105393149	96768	101816	+	UPSTREAM	4921	LOC105393149	sarcalumenin	-	-	-	-	-	-	-
MSTRG.40846.1	NW_011952446.1	231261	231550	-	ncbi_105393166	232656	234230	-	DOWNSTREAM	1105	LOC105393166	EF-hand domain-containing family member B	-	-	-	-	-	-	-
MSTRG.40846.1	NW_011952446.1	231261	231550	-	ncbi_105393181	228273	230869	+	DOWNSTREAM	391	LOC105393181	ejaculatory bulb-specific protein 3-like	-	-	-	-	-	-	-
MSTRG.40903.2	NW_011952448.1	50955	53781	-	ncbi_105393197	24381	46027	-	UPSTREAM	4927	LOC105393197	plasminogen-like	-	-	-	-	-	GO:0016787//hydrolase activity	-
MSTRG.40967.1	NW_011952450.1	50702	57231	-	ncbi_105393232	66022	94758	+	UPSTREAM	8790	LOC105393232	chymotrypsin-2-like	-	-	-	-	-	-	-
MSTRG.40977.4	NW_011952450.1	116371	119489	+	ncbi_105393225	101980	110508	+	DOWNSTREAM	5862	LOC105393225	transmembrane protease serine 9-like	-	-	-	-	-	-	-
MSTRG.40977.4	NW_011952450.1	116371	119489	+	ncbi_105393228	110949	116127	+	DOWNSTREAM	243	LOC105393228	uncharacterized LOC105393228	-	-	-	-	-	-	-
MSTRG.41020.1	NW_011952451.1	223719	224018	+	ncbi_105393245	150441	214297	-	UPSTREAM	9421	LOC105393245	nose resistant to fluoxetine protein 6-like	-	-	-	-	-	-	-
MSTRG.41134.1	NW_011952455.1	28722	81541	+	ncbi_105393282	18119	22640	+	DOWNSTREAM	6081	LOC105393282	fer3-like protein	-	-	-	-	-	-	-
MSTRG.41160.1	NW_011952455.1	208242	211461	-	ncbi_105393287	194166	201042	+	DOWNSTREAM	7199	LOC105393287	larval cuticle protein LCP-22-like	-	-	-	-	-	-	-
MSTRG.41160.1	NW_011952455.1	208242	211461	-	ncbi_105393289	212957	249875	-	DOWNSTREAM	1495	LOC105393289	calmodulin-A-like	-	-	-	-	-	-	-
MSTRG.41165.1	NW_011952456.1	2051	18149	-	ncbi_105393295	23650	24552	+	UPSTREAM	5500	LOC105393295	histone H3	-	-	-	-	GO:0043231//intracellular membrane-bounded organelle;GO:0043232//intracellular non-membrane-bounded organelle	GO:0003676//nucleic acid binding;GO:0046983//protein dimerization activity	-
MSTRG.41165.2	NW_011952456.1	5567	18177	-	ncbi_105393295	23650	24552	+	UPSTREAM	5472	LOC105393295	histone H3	-	-	-	-	GO:0043231//intracellular membrane-bounded organelle;GO:0043232//intracellular non-membrane-bounded organelle	GO:0003676//nucleic acid binding;GO:0046983//protein dimerization activity	-
MSTRG.41165.4	NW_011952456.1	14190	18149	-	ncbi_105393295	23650	24552	+	UPSTREAM	5500	LOC105393295	histone H3	-	-	-	-	GO:0043231//intracellular membrane-bounded organelle;GO:0043232//intracellular non-membrane-bounded organelle	GO:0003676//nucleic acid binding;GO:0046983//protein dimerization activity	-
MSTRG.41181.2	NW_011952456.1	104238	104898	+	ncbi_105393299	93815	96339	-	UPSTREAM	7898	LOC105393299	mucolipin-3-like	-	-	-	-	-	-	-
MSTRG.41181.2	NW_011952456.1	104238	104898	+	ncbi_105393301	111975	120260	+	UPSTREAM	7076	LOC105393301	trimethylguanosine synthase	Genetic Information Processing	Translation	ko03013//RNA transport	K14292	-	-	-
MSTRG.41231.1	NW_011952457.1	179855	180970	-	ncbi_105393314	177728	179641	+	DOWNSTREAM	213	LOC105393314	putative nuclease HARBI1	-	-	-	-	-	-	-
MSTRG.41321.2	NW_011952460.1	127429	129552	+	ncbi_105393337	133376	134357	+	UPSTREAM	3823	LOC105393337	N-acetyltransferase 6	-	-	-	-	-	-	-
XR_961018.1	NW_011952461.1	220845	221841	+	ncbi_105393367	229690	252805	+	UPSTREAM	7848	LOC105393367	microtubule-associated serine/threonine-protein kinase 3-like	-	-	-	-	-	-	-
MSTRG.41453.4	NW_011952464.1	62728	64562	+	ncbi_105393409	67145	86738	-	DOWNSTREAM	2582	LOC105393409	WD repeat-containing protein on Y chromosome-like	-	-	-	-	-	-	-
MSTRG.41471.1	NW_011952464.1	139072	140473	+	ncbi_105393413	149510	155395	+	UPSTREAM	9036	LOC105393413	acetylcholine receptor subunit beta-type lev-1-like	-	-	-	-	-	-	-
MSTRG.41476.1	NW_011952464.1	162706	169044	-	ncbi_105393413	149510	155395	+	DOWNSTREAM	7310	LOC105393413	acetylcholine receptor subunit beta-type lev-1-like	-	-	-	-	-	-	-
MSTRG.41476.1	NW_011952464.1	162706	169044	-	ncbi_105393402	158641	162053	-	UPSTREAM	652	LOC105393402	solute carrier family 52	-	-	-	-	-	-	-
MSTRG.41476.1	NW_011952464.1	162706	169044	-	ncbi_105393403	177057	196060	-	DOWNSTREAM	8012	LOC105393403	reticulon-3-B	-	-	-	-	-	-	-
MSTRG.41476.3	NW_011952464.1	162706	169044	-	ncbi_105393413	149510	155395	+	DOWNSTREAM	7310	LOC105393413	acetylcholine receptor subunit beta-type lev-1-like	-	-	-	-	-	-	-
MSTRG.41476.3	NW_011952464.1	162706	169044	-	ncbi_105393402	158641	162053	-	UPSTREAM	652	LOC105393402	solute carrier family 52	-	-	-	-	-	-	-
MSTRG.41476.3	NW_011952464.1	162706	169044	-	ncbi_105393403	177057	196060	-	DOWNSTREAM	8012	LOC105393403	reticulon-3-B	-	-	-	-	-	-	-
MSTRG.41512.1	NW_011952465.1	185911	187013	-	ncbi_105393427	174259	177238	+	DOWNSTREAM	8672	LOC105393427	uncharacterized LOC105393427	-	-	-	-	-	-	-
MSTRG.41564.2	NW_011952467.1	152216	155123	+	ncbi_105393460	79429	151356	+	DOWNSTREAM	859	LOC105393460	calmodulin-binding transcription activator 2-like	-	-	-	-	-	-	-
MSTRG.41591.2	NW_011952468.1	193165	223930	+	MSTRG.41595	230630	235846	+	UPSTREAM	6699	RTase	PREDICTED: RNA-directed DNA polymerase from mobile element jockey-like isoform X1 [Amyelois transitella]	-	-	-	-	-	-	-
MSTRG.41640.1	NW_011952470.1	56807	62206	-	ncbi_105393502	62368	94141	-	DOWNSTREAM	161	LOC105393502	apoptosis-resistant E3 ubiquitin protein ligase 1-like	-	-	-	-	-	-	-
MSTRG.41665.1	NW_011952471.1	36443	38870	+	ncbi_105393513	29295	29853	+	DOWNSTREAM	6589	LOC105393513	myotrophin-like	-	-	-	-	-	GO:0003824//catalytic activity	GO:0008152//metabolic process
MSTRG.41667.1	NW_011952471.1	61044	78983	+	ncbi_105393507	83392	85371	+	UPSTREAM	4408	LOC105393507	ceramide phosphoethanolamine synthase	-	-	-	-	-	-	-
MSTRG.41703.1	NW_011952472.1	55664	57630	+	ncbi_105393522	61483	83731	+	UPSTREAM	3852	LOC105393522	synaptic vesicle membrane protein VAT-1 homolog-like	-	-	-	-	-	GO:0003824//catalytic activity	GO:0044710//single-organism metabolic process
MSTRG.41728.1	NW_011952472.1	178330	179316	+	ncbi_105393523	169833	171297	+	DOWNSTREAM	7032	LOC105393523	lipase 1-like	-	-	-	-	-	-	-
MSTRG.41733.1	NW_011952472.1	192474	193455	+	ncbi_105393527	200074	240802	-	DOWNSTREAM	6618	LOC105393527	A disintegrin and metalloproteinase with thrombospondin motifs 7	-	-	-	-	-	-	-
XR_961028.1	NW_011952473.1	197046	198661	+	ncbi_105393539	184013	189147	-	UPSTREAM	7898	LOC105393539	serine protease persephone-like	-	-	-	-	-	-	-
XR_961028.1	NW_011952473.1	197046	198661	+	ncbi_105393541	198964	206625	-	DOWNSTREAM	302	LOC105393541	ATP synthase subunit beta	Metabolism;Metabolism	Global and overview maps;Energy metabolism	ko01100//Metabolic pathways;ko00190//Oxidative phosphorylation	K02133;K02133	GO:0033178//proton-transporting two-sector ATPase complex, catalytic domain	GO:0019829//cation-transporting ATPase activity;GO:0032550//purine ribonucleoside binding	GO:0006754//ATP biosynthetic process;GO:0015988//energy coupled proton transmembrane transport, against electrochemical gradient
XR_961028.1	NW_011952473.1	197046	198661	+	ncbi_105393548	189942	196777	+	DOWNSTREAM	268	LOC105393548	zinc finger protein 32-like	-	-	-	-	-	-	-
MSTRG.41809.1	NW_011952474.1	211350	212940	+	MSTRG.41807	210366	211290	-	UPSTREAM	59	--	-	-	-	-	-	-	-	-
MSTRG.41810.1	NW_011952474.1	211351	212911	-	MSTRG.41807	210366	211290	-	UPSTREAM	60	--	-	-	-	-	-	-	-	-
MSTRG.41859.1	NW_011952476.1	31741	38271	-	MSTRG.41861	46866	50123	+	UPSTREAM	8594	--	PREDICTED: TBC1 domain family member 30 isoform X4 [Papilio polytes]	-	-	-	-	-	-	-
MSTRG.41860.1	NW_011952476.1	32044	38268	+	MSTRG.41861	46866	50123	+	UPSTREAM	8597	--	PREDICTED: TBC1 domain family member 30 isoform X4 [Papilio polytes]	-	-	-	-	-	-	-
XR_961029.1	NW_011952477.1	234698	238597	-	ncbi_105393632	224555	227187	-	UPSTREAM	7510	LOC105393632	cilia- and flagella-associated protein 36	-	-	-	-	-	-	-
MSTRG.42012.2	NW_011952480.1	69573	70153	+	ncbi_105393666	73335	119775	-	DOWNSTREAM	3181	LOC105393666	uncharacterized LOC105393666	-	-	-	-	-	-	-
MSTRG.42037.1	NW_011952481.1	29464	31593	-	ncbi_105393668	26798	29259	+	DOWNSTREAM	204	LOC105393668	cysteine and glycine-rich protein 3-like	-	-	-	-	-	-	-
MSTRG.42037.1	NW_011952481.1	29464	31593	-	ncbi_105393687	37333	49088	-	DOWNSTREAM	5739	LOC105393687	40S ribosomal protein S3a-like	Genetic Information Processing	Translation	ko03010//Ribosome	K02984	-	-	-
MSTRG.42037.1	NW_011952481.1	29464	31593	-	ncbi_105393686	655	20394	-	UPSTREAM	9069	LOC105393686	protein diaphanous-like	-	-	-	-	-	-	-
MSTRG.42048.1	NW_011952481.1	95027	98244	-	ncbi_105393670	81822	91621	+	DOWNSTREAM	3405	LOC105393670	transferrin-like	-	-	-	-	-	-	-
MSTRG.42100.1	NW_011952482.1	153718	167469	-	MSTRG.42098	139627	144289	-	UPSTREAM	9428	--	-	-	-	-	-	-	-	-
MSTRG.42100.1	NW_011952482.1	153718	167469	-	ncbi_105393699	171920	178454	-	DOWNSTREAM	4450	LOC105393699	uncharacterized LOC105393699	-	-	-	-	-	-	-
MSTRG.42105.1	NW_011952482.1	184064	185920	-	ncbi_105393699	171920	178454	-	UPSTREAM	5609	LOC105393699	uncharacterized LOC105393699	-	-	-	-	-	-	-
MSTRG.42137.2	NW_011952483.1	118793	119615	+	ncbi_105393714	97990	118726	+	DOWNSTREAM	66	LOC105393714	amidophosphoribosyltransferase-like	Metabolism;Metabolism;Metabolism;Metabolism;Metabolism	Global and overview maps;Global and overview maps;Global and overview maps;Nucleotide metabolism;Amino acid metabolism	ko01100//Metabolic pathways;ko01110//Biosynthesis of secondary metabolites;ko01130//Biosynthesis of antibiotics;ko00230//Purine metabolism;ko00250//Alanine, aspartate and glutamate metabolism	K00764;K00764;K00764;K00764;K00764	-	-	-
MSTRG.42140.1	NW_011952483.1	133860	219560	-	ncbi_105393722	224795	230202	-	DOWNSTREAM	5234	LOC105393722	fatty acid synthase-like	Metabolism;Metabolism;Metabolism	Global and overview maps;Global and overview maps;Lipid metabolism	ko01100//Metabolic pathways;ko01212//Fatty acid metabolism;ko00061//Fatty acid biosynthesis	K00665;K00665;K00665	-	-	-
MSTRG.42157.1	NW_011952484.1	7555	74290	+	ncbi_105393723	81	6532	-	UPSTREAM	1022	LOC105393723	secretory carrier-associated membrane protein 1	-	-	-	-	-	-	-
XR_961036.1	NW_011952484.1	7555	86166	+	ncbi_105393723	81	6532	-	UPSTREAM	1022	LOC105393723	secretory carrier-associated membrane protein 1	-	-	-	-	-	-	-
MSTRG.42175.1	NW_011952484.1	138849	141454	+	ncbi_105393727	146106	173461	+	UPSTREAM	4651	LOC105393727	furin-like protease 2	-	-	-	-	-	-	-
MSTRG.42183.1	NW_011952484.1	221950	223058	-	ncbi_105393725	223976	227820	-	DOWNSTREAM	917	LOC105393725	bifunctional methylenetetrahydrofolate dehydrogenase/cyclohydrolase	Metabolism;Metabolism	Global and overview maps;Metabolism of cofactors and vitamins	ko01100//Metabolic pathways;ko00670//One carbon pool by folate	K13403;K13403	-	-	-
MSTRG.42237.1	NW_011952487.1	59260	73851	-	MSTRG.42242	83007	85013	-	DOWNSTREAM	9155	--	PREDICTED: protein unc-13 homolog C-like [Amyelois transitella]	-	-	-	-	-	-	-
MSTRG.42262.2	NW_011952487.1	220662	223205	+	ncbi_105393753	203856	213329	-	UPSTREAM	7332	LOC105393753	splicing factor 3B subunit 2-like	Genetic Information Processing	Transcription	ko03040//Spliceosome	K12829	-	-	-
MSTRG.42293.1	NW_011952488.1	173984	174843	-	ncbi_105393773	165494	173207	+	DOWNSTREAM	776	LOC105393773	DNA-directed RNA polymerase I subunit RPA2-like	Metabolism;Metabolism;Metabolism;Genetic Information Processing	Global and overview maps;Nucleotide metabolism;Nucleotide metabolism;Transcription	ko01100//Metabolic pathways;ko00230//Purine metabolism;ko00240//Pyrimidine metabolism;ko03020//RNA polymerase	K03002;K03002;K03002;K03002	-	-	-
MSTRG.42332.1	NW_011952491.1	8991	25667	+	ncbi_105393782	290	6817	-	UPSTREAM	2173	LOC105393782	uncharacterized LOC105393782	-	-	-	-	-	-	-
MSTRG.42332.1	NW_011952491.1	8991	25667	+	ncbi_105393784	32278	53804	+	UPSTREAM	6610	LOC105393784	PAB-dependent poly(A)-specific ribonuclease subunit PAN2	Genetic Information Processing	Folding, sorting and degradation	ko03018//RNA degradation	K12571	-	-	-
MSTRG.42346.1	NW_011952491.1	91592	94192	+	ncbi_105393786	80578	83495	+	DOWNSTREAM	8096	LOC105393786	larval cuticle protein LCP-17-like	-	-	-	-	-	-	-
MSTRG.42397.1	NW_011952493.1	40781	41783	-	ncbi_105393818	32367	38209	+	DOWNSTREAM	2571	LOC105393818	uncharacterized LOC105393818	-	-	-	-	-	-	-
MSTRG.42397.1	NW_011952493.1	40781	41783	-	ncbi_105393811	47389	50968	+	UPSTREAM	5605	LOC105393811	jmjC domain-containing protein 7	-	-	-	-	-	-	-
MSTRG.42419.1	NW_011952493.1	194401	195317	+	ncbi_105393822	175310	189571	+	DOWNSTREAM	4829	LOC105393822	uncharacterized LOC105393822	-	-	-	-	-	-	-
MSTRG.42465.1	NW_011952495.1	59999	61716	-	ncbi_105393842	40216	51796	+	DOWNSTREAM	8202	LOC105393842	globin-like	-	-	-	-	-	-	-
MSTRG.42468.1	NW_011952495.1	74942	75431	+	ncbi_105393861	82953	94504	-	DOWNSTREAM	7521	LOC105393861	zinc finger protein 598-like	-	-	-	-	-	-	-
MSTRG.42504.1	NW_011952496.1	14392	80779	-	ncbi_105393866	82971	91113	-	DOWNSTREAM	2191	LOC105393866	uncharacterized LOC105393866	-	-	-	-	-	-	-
MSTRG.42581.1	NW_011952498.1	54103	55030	-	ncbi_105393886	43638	44820	+	DOWNSTREAM	9282	LOC105393886	trypsin	Environmental Information Processing	Signaling molecules and interaction	ko04080//Neuroactive ligand-receptor interaction	K01312	-	-	-
MSTRG.42581.1	NW_011952498.1	54103	55030	-	ncbi_105393887	56978	59126	-	DOWNSTREAM	1947	LOC105393887	achelase-1-like	Environmental Information Processing	Signaling molecules and interaction	ko04080//Neuroactive ligand-receptor interaction	K01312	-	-	-
MSTRG.42582.1	NW_011952498.1	54124	54892	+	ncbi_105393886	43638	44820	+	DOWNSTREAM	9303	LOC105393886	trypsin	Environmental Information Processing	Signaling molecules and interaction	ko04080//Neuroactive ligand-receptor interaction	K01312	-	-	-
MSTRG.42582.1	NW_011952498.1	54124	54892	+	ncbi_105393887	56978	59126	-	DOWNSTREAM	2085	LOC105393887	achelase-1-like	Environmental Information Processing	Signaling molecules and interaction	ko04080//Neuroactive ligand-receptor interaction	K01312	-	-	-
MSTRG.42602.1	NW_011952499.1	26276	27289	-	ncbi_105393898	33991	44251	+	UPSTREAM	6701	LOC105393898	vacuolar protein sorting-associated protein 45-like	Cellular Processes	Transport and catabolism	ko04144//Endocytosis	K12479	-	-	-
MSTRG.42602.1	NW_011952499.1	26276	27289	-	ncbi_105393896	29042	33817	-	DOWNSTREAM	1752	LOC105393896	probable malate dehydrogenase	Metabolism;Metabolism;Metabolism;Metabolism;Metabolism;Metabolism;Metabolism;Metabolism;Metabolism	Global and overview maps;Global and overview maps;Global and overview maps;Global and overview maps;Global and overview maps;Carbohydrate metabolism;Carbohydrate metabolism;Carbohydrate metabolism;Amino acid metabolism	ko01100//Metabolic pathways;ko01110//Biosynthesis of secondary metabolites;ko01130//Biosynthesis of antibiotics;ko01120//Microbial metabolism in diverse environments;ko01200//Carbon metabolism;ko00620//Pyruvate metabolism;ko00020//Citrate cycle (TCA cycle);ko00630//Glyoxylate and dicarboxylate metabolism;ko00270//Cysteine and methionine metabolism	K00026;K00026;K00026;K00026;K00026;K00026;K00026;K00026;K00026	-	GO:0016615//malate dehydrogenase activity	GO:0005975//carbohydrate metabolic process;GO:0006101//citrate metabolic process;GO:0043648//dicarboxylic acid metabolic process
MSTRG.42602.2	NW_011952499.1	26674	27252	-	ncbi_105393898	33991	44251	+	UPSTREAM	6738	LOC105393898	vacuolar protein sorting-associated protein 45-like	Cellular Processes	Transport and catabolism	ko04144//Endocytosis	K12479	-	-	-
MSTRG.42602.2	NW_011952499.1	26674	27252	-	ncbi_105393896	29042	33817	-	DOWNSTREAM	1789	LOC105393896	probable malate dehydrogenase	Metabolism;Metabolism;Metabolism;Metabolism;Metabolism;Metabolism;Metabolism;Metabolism;Metabolism	Global and overview maps;Global and overview maps;Global and overview maps;Global and overview maps;Global and overview maps;Carbohydrate metabolism;Carbohydrate metabolism;Carbohydrate metabolism;Amino acid metabolism	ko01100//Metabolic pathways;ko01110//Biosynthesis of secondary metabolites;ko01130//Biosynthesis of antibiotics;ko01120//Microbial metabolism in diverse environments;ko01200//Carbon metabolism;ko00620//Pyruvate metabolism;ko00020//Citrate cycle (TCA cycle);ko00630//Glyoxylate and dicarboxylate metabolism;ko00270//Cysteine and methionine metabolism	K00026;K00026;K00026;K00026;K00026;K00026;K00026;K00026;K00026	-	GO:0016615//malate dehydrogenase activity	GO:0005975//carbohydrate metabolic process;GO:0006101//citrate metabolic process;GO:0043648//dicarboxylic acid metabolic process
MSTRG.42658.1	NW_011952500.1	163114	165370	+	ncbi_105393914	157807	161593	+	DOWNSTREAM	1520	LOC105393914	uncharacterized LOC105393914	-	-	-	-	-	-	-
MSTRG.42858.1	NW_011952507.1	157142	157783	-	ncbi_105394005	140536	154339	-	UPSTREAM	2802	LOC105394005	dynein heavy chain 2	-	-	-	-	-	-	-
MSTRG.42882.1	NW_011952509.1	4165	5533	+	ncbi_105394017	6720	80798	-	DOWNSTREAM	1186	LOC105394017	interferon-related developmental regulator 1-like	-	-	-	-	-	-	-
MSTRG.42913.1	NW_011952510.1	38410	39499	-	ncbi_105394026	30584	32476	+	DOWNSTREAM	5933	LOC105394026	cytoplasmic tRNA 2-thiolation protein 1-like	Genetic Information Processing	Folding, sorting and degradation	ko04122//Sulfur relay system	K14168	GO:0044444//cytoplasmic part	-	GO:0002097//tRNA wobble base modification
MSTRG.42913.1	NW_011952510.1	38410	39499	-	ncbi_105394027	32902	38136	+	DOWNSTREAM	273	LOC105394027	zinc finger protein 84-like	-	-	-	-	-	-	-
MSTRG.43069.1	NW_011952515.1	27006	31125	-	ncbi_105394095	13229	26433	+	DOWNSTREAM	572	LOC105394095	lysine histidine transporter 1-like	-	-	-	-	GO:0031224//intrinsic component of membrane	-	-
MSTRG.43069.2	NW_011952515.1	28365	30508	-	ncbi_105394095	13229	26433	+	DOWNSTREAM	1931	LOC105394095	lysine histidine transporter 1-like	-	-	-	-	GO:0031224//intrinsic component of membrane	-	-
MSTRG.43069.3	NW_011952515.1	28539	30665	-	ncbi_105394095	13229	26433	+	DOWNSTREAM	2105	LOC105394095	lysine histidine transporter 1-like	-	-	-	-	GO:0031224//intrinsic component of membrane	-	-
MSTRG.43115.1	NW_011952516.1	173359	175308	-	ncbi_105394106	175488	179066	-	DOWNSTREAM	179	LOC105394106	myrosinase 1-like	-	-	-	-	-	-	-
MSTRG.43115.1	NW_011952516.1	173359	175308	-	ncbi_105394107	179925	192890	-	DOWNSTREAM	4616	LOC105394107	multidrug resistance protein homolog 49-like	Environmental Information Processing	Membrane transport	ko02010//ABC transporters	K05658	-	-	-
MSTRG.43124.1	NW_011952517.1	27688	29999	+	ncbi_105394112	22740	23887	+	DOWNSTREAM	3800	LOC105394112	uncharacterized LOC105394112	-	-	-	-	-	-	-
MSTRG.43124.1	NW_011952517.1	27688	29999	+	ncbi_105394113	24354	27515	-	UPSTREAM	172	LOC105394113	dnaJ homolog subfamily C member 8-like	-	-	-	-	-	-	-
MSTRG.43125.2	NW_011952517.1	30151	32176	-	ncbi_105394112	22740	23887	+	DOWNSTREAM	6263	LOC105394112	uncharacterized LOC105394112	-	-	-	-	-	-	-
MSTRG.43125.2	NW_011952517.1	30151	32176	-	ncbi_105394113	24354	27515	-	UPSTREAM	2635	LOC105394113	dnaJ homolog subfamily C member 8-like	-	-	-	-	-	-	-
MSTRG.43128.1	NW_011952517.1	62758	66018	+	ncbi_105394119	73222	81029	+	UPSTREAM	7203	LOC105394119	uncharacterized LOC105394119	-	-	-	-	-	-	-
MSTRG.43274.3	NW_011952524.1	147870	152060	-	ncbi_105394164	145586	146793	+	DOWNSTREAM	1076	LOC105394164	uncharacterized protein C1orf177 homolog	-	-	-	-	-	-	-
MSTRG.43274.4	NW_011952524.1	147870	152287	-	ncbi_105394164	145586	146793	+	DOWNSTREAM	1076	LOC105394164	uncharacterized protein C1orf177 homolog	-	-	-	-	-	-	-
MSTRG.43316.1	NW_011952525.1	175200	175787	-	ncbi_105394179	165442	174921	-	UPSTREAM	278	LOC105394179	annexin B10	-	-	-	-	-	-	-
MSTRG.43330.1	NW_011952526.1	32655	35224	+	ncbi_105394193	5726	24670	-	UPSTREAM	7984	LOC105394193	integrin beta-PS-like	Cellular Processes;Environmental Information Processing	Transport and catabolism;Signaling molecules and interaction	ko04145//Phagosome;ko04512//ECM-receptor interaction	K05719;K05719	GO:0031224//intrinsic component of membrane	-	GO:0007166//cell surface receptor signaling pathway;GO:0022610//biological adhesion;GO:0044707//single-multicellular organism process
MSTRG.43394.3	NW_011952527.1	144430	147771	+	ncbi_105394212	139916	140855	-	UPSTREAM	3574	LOC105394212	dehydrogenase/reductase SDR family member 4	Metabolism;Metabolism	Global and overview maps;Energy metabolism	ko01100//Metabolic pathways;ko00190//Oxidative phosphorylation	K02126;K02126	GO:0019866//organelle inner membrane;GO:0033177//proton-transporting two-sector ATPase complex, proton-transporting domain	GO:0015077//monovalent inorganic cation transmembrane transporter activity	GO:0006754//ATP biosynthetic process
MSTRG.43394.3	NW_011952527.1	144430	147771	+	ncbi_105394221	148326	150557	+	UPSTREAM	554	LOC105394221	uncharacterized protein DDB_G0284459-like	Metabolism;Metabolism	Global and overview maps;Energy metabolism	ko01100//Metabolic pathways;ko00190//Oxidative phosphorylation	K03880;K03880	GO:0031090//organelle membrane;GO:0044425//membrane part	GO:0050136//NADH dehydrogenase (quinone) activity	GO:0044710//single-organism metabolic process
MSTRG.43394.3	NW_011952527.1	144430	147771	+	ncbi_105394214	151052	188769	-	DOWNSTREAM	3280	LOC105394214	clathrin heavy chain	Metabolism;Metabolism	Global and overview maps;Energy metabolism	ko01100//Metabolic pathways;ko00190//Oxidative phosphorylation	K03883;K03883	GO:0019866//organelle inner membrane;GO:0030125//clathrin vesicle coat;GO:0031090//organelle membrane;GO:0031224//intrinsic component of membrane	GO:0050136//NADH dehydrogenase (quinone) activity	GO:0015031//protein transport;GO:0022904//respiratory electron transport chain
MSTRG.43452.1	NW_011952529.1	59007	60137	+	ncbi_105394231	49448	53061	-	UPSTREAM	5945	LOC105394231	facilitated trehalose transporter Tret1-like	-	-	-	-	-	-	-
MSTRG.43452.1	NW_011952529.1	59007	60137	+	ncbi_105394237	55287	58581	-	UPSTREAM	425	LOC105394237	signal recognition particle subunit SRP68-like	Genetic Information Processing	Folding, sorting and degradation	ko03060//Protein export	K03107	GO:0048500//signal recognition particle	GO:0003723//RNA binding;GO:0005048//signal sequence binding	GO:0006613//cotranslational protein targeting to membrane
MSTRG.43452.1	NW_011952529.1	59007	60137	+	ncbi_105394239	69683	91092	-	DOWNSTREAM	9545	LOC105394239	E2/E3 hybrid ubiquitin-protein ligase UBE2O-like	Genetic Information Processing	Folding, sorting and degradation	ko04120//Ubiquitin mediated proteolysis	K10581	-	-	-
MSTRG.43572.1	NW_011952534.1	186138	187344	-	ncbi_105394281	170191	176679	-	UPSTREAM	9458	LOC105394281	dynein assembly factor 5	-	-	-	-	-	-	-
MSTRG.43572.1	NW_011952534.1	186138	187344	-	ncbi_105394283	182819	184010	+	DOWNSTREAM	2127	LOC105394283	mesencephalic astrocyte-derived neurotrophic factor homolog	-	-	-	-	-	-	-
MSTRG.43572.1	NW_011952534.1	186138	187344	-	ncbi_105394284	184366	185340	-	UPSTREAM	797	LOC105394284	putative ATP synthase subunit f	Metabolism;Metabolism	Global and overview maps;Energy metabolism	ko01100//Metabolic pathways;ko00190//Oxidative phosphorylation	K02130;K02130	-	-	-
XR_961061.1	NW_011952536.1	63947	65214	+	ncbi_105394301	68717	74291	+	UPSTREAM	3502	LOC105394301	uncharacterized LOC105394301	-	-	-	-	-	-	-
MSTRG.43628.3	NW_011952536.1	124239	125574	+	ncbi_105394315	132228	190460	+	UPSTREAM	6653	LOC105394315	centromere-associated protein E-like	-	-	-	-	-	-	-
MSTRG.43634.1	NW_011952537.1	1934	2843	+	ncbi_105394316	3597	7669	+	UPSTREAM	753	LOC105394316	leukocyte receptor cluster member 8 homolog	-	-	-	-	-	GO:0003824//catalytic activity	GO:0008152//metabolic process
MSTRG.43649.1	NW_011952537.1	134458	137694	+	ncbi_105394319	110521	126741	-	UPSTREAM	7716	LOC105394319	heterogeneous nuclear ribonucleoprotein R-like	-	-	-	-	-	-	-
MSTRG.43650.1	NW_011952537.1	134507	137694	-	ncbi_105394319	110521	126741	-	UPSTREAM	7765	LOC105394319	heterogeneous nuclear ribonucleoprotein R-like	-	-	-	-	-	-	-
MSTRG.43669.1	NW_011952538.1	80834	83606	-	ncbi_105394329	70754	72765	-	UPSTREAM	8068	LOC105394329	heme oxygenase 1-like	Metabolism;Metabolism;Metabolism	Global and overview maps;Global and overview maps;Metabolism of cofactors and vitamins	ko01100//Metabolic pathways;ko01110//Biosynthesis of secondary metabolites;ko00860//Porphyrin and chlorophyll metabolism	K00510;K00510;K00510	-	-	GO:0055114//oxidation-reduction process
MSTRG.43669.1	NW_011952538.1	80834	83606	-	ncbi_105394338	84509	89458	+	UPSTREAM	902	LOC105394338	protein SMG8	-	-	-	-	-	-	-
MSTRG.43701.1	NW_011952539.1	163089	171708	-	ncbi_105394340	141876	157486	+	DOWNSTREAM	5602	LOC105394340	tryptase-like	-	-	-	-	-	-	-
MSTRG.43784.2	NW_011952543.1	84280	85409	-	ncbi_105394392	85417	93814	-	DOWNSTREAM	7	LOC105394392	endoribonuclease Dcr-1-like	-	-	-	-	-	-	-
MSTRG.43794.1	NW_011952543.1	146646	147216	+	ncbi_105394394	109503	143435	-	UPSTREAM	3210	LOC105394394	endoribonuclease Dicer-like	-	-	-	-	-	-	-
MSTRG.43825.1	NW_011952544.1	170597	172026	-	ncbi_105394404	175674	180082	-	DOWNSTREAM	3647	LOC105394404	uncharacterized LOC105394404	-	-	-	-	-	-	-
MSTRG.43854.3	NW_011952546.1	114856	116560	-	ncbi_105394413	104536	109847	-	UPSTREAM	5008	LOC105394413	aldose reductase-like	Metabolism;Metabolism;Metabolism;Metabolism;Metabolism	Global and overview maps;Carbohydrate metabolism;Carbohydrate metabolism;Lipid metabolism;Carbohydrate metabolism	ko01100//Metabolic pathways;ko00040//Pentose and glucuronate interconversions;ko00052//Galactose metabolism;ko00561//Glycerolipid metabolism;ko00051//Fructose and mannose metabolism	K00011;K00011;K00011;K00011;K00011	-	-	-
MSTRG.43965.2	NW_011952551.1	153768	154390	-	ncbi_105394458	160780	162244	-	DOWNSTREAM	6389	LOC105394458	lipase 1-like	-	-	-	-	-	-	-
MSTRG.43965.2	NW_011952551.1	153768	154390	-	ncbi_105394462	128880	144181	-	UPSTREAM	9586	LOC105394462	serine/threonine-protein phosphatase 2A catalytic subunit alpha isoform-like	Genetic Information Processing;Environmental Information Processing;Environmental Information Processing	Translation;Signal transduction;Signal transduction	ko03015//mRNA surveillance pathway;ko04391//Hippo signaling pathway -fly;ko04350//TGF-beta signaling pathway	K04382;K04382;K04382	-	GO:0003824//catalytic activity	GO:0006796//phosphate-containing compound metabolic process
MSTRG.44038.1	NW_011952555.1	25540	27265	-	ncbi_105394486	1853	16529	-	UPSTREAM	9010	LOC105394486	lysosome membrane protein 2-like	-	-	-	-	-	-	-
MSTRG.44094.1	NW_011952557.1	110388	112710	+	ncbi_105394505	104399	109048	+	DOWNSTREAM	1339	LOC105394505	uncharacterized LOC105394505	-	-	-	-	-	-	-
MSTRG.44094.1	NW_011952557.1	110388	112710	+	ncbi_105394509	83397	101932	+	DOWNSTREAM	8455	LOC105394509	uncharacterized LOC105394509	-	-	-	-	-	-	-
MSTRG.44167.1	NW_011952560.1	92126	92511	-	ncbi_105394551	65443	86580	+	DOWNSTREAM	5545	LOC105394551	uncharacterized LOC105394551	-	-	-	-	-	-	-
XR_961073.1	NW_011952562.1	25609	34036	-	ncbi_105394567	11123	25567	-	UPSTREAM	41	LOC105394567	uncharacterized LOC105394567	-	-	-	-	-	-	-
MSTRG.44269.1	NW_011952565.1	6011	6773	+	ncbi_105394608	10533	19096	+	UPSTREAM	3759	LOC105394608	protein lifeguard 1-like	-	-	-	-	-	-	-
MSTRG.44362.1	NW_011952570.1	65468	66070	+	ncbi_105394658	68868	71009	+	UPSTREAM	2797	LOC105394658	uncharacterized LOC105394658	-	-	-	-	-	-	-
MSTRG.44388.2	NW_011952571.1	127824	138251	+	ncbi_105394661	138588	148851	-	DOWNSTREAM	336	LOC105394661	uncharacterized LOC105394661	-	-	-	-	-	-	-
MSTRG.44737.2	NW_011952589.1	110508	112886	-	ncbi_105394813	101566	102284	-	UPSTREAM	8223	LOC105394813	protein FAM173B-like	-	-	-	-	-	-	-
MSTRG.44737.2	NW_011952589.1	110508	112886	-	ncbi_105394818	121138	123626	-	DOWNSTREAM	8251	LOC105394818	ubiquitin-conjugating enzyme E2 L3	Genetic Information Processing	Folding, sorting and degradation	ko04120//Ubiquitin mediated proteolysis	K04552	-	GO:0003824//catalytic activity	-
MSTRG.44753.1	NW_011952590.1	47849	49555	+	ncbi_105394825	40719	45469	-	UPSTREAM	2379	LOC105394825	arrestin homolog	-	-	-	-	-	-	-
MSTRG.44819.2	NW_011952593.1	131316	135676	+	ncbi_105394841	117529	122379	-	UPSTREAM	8936	LOC105394841	uncharacterized LOC105394841	-	-	-	-	-	-	-
MSTRG.44880.1	NW_011952597.1	5206	14844	-	ncbi_105394883	17259	27721	-	DOWNSTREAM	2414	LOC105394883	elongation of very long chain fatty acids protein AAEL008004-like	-	-	-	-	-	-	-
MSTRG.44884.1	NW_011952597.1	33653	43375	-	ncbi_105394883	17259	27721	-	UPSTREAM	5931	LOC105394883	elongation of very long chain fatty acids protein AAEL008004-like	-	-	-	-	-	-	-
MSTRG.45035.1	NW_011952606.1	17391	18916	+	ncbi_105394943	7320	14175	+	DOWNSTREAM	3215	LOC105394943	tumor suppressor p53-binding protein 1-like	-	-	-	-	-	-	-
MSTRG.45035.1	NW_011952606.1	17391	18916	+	MSTRG.45036	20000	28074	+	UPSTREAM	1083	pol	PREDICTED: RNA-directed DNA polymerase from mobile element jockey-like isoform X1 [Amyelois transitella]	-	-	-	-	-	-	-
MSTRG.45038.1	NW_011952606.1	22519	23218	-	ncbi_105394943	7320	14175	+	DOWNSTREAM	8343	LOC105394943	tumor suppressor p53-binding protein 1-like	-	-	-	-	-	-	-
MSTRG.45089.1	NW_011952609.1	103367	104391	+	MSTRG.45086	95616	99259	+	DOWNSTREAM	4107	SETMAR	transposase [Attacus atlas]	Metabolism	Amino acid metabolism	ko00310//Lysine degradation	K11433	GO:0043231//intracellular membrane-bounded organelle;GO:0044427//chromosomal part	GO:0004520//endodeoxyribonuclease activity;GO:0018024//histone-lysine N-methyltransferase activity;GO:0019899//enzyme binding;GO:0043566//structure-specific DNA binding;GO:0046983//protein dimerization activity	GO:0006303//double-strand break repair via nonhomologous end joining;GO:0006308//DNA catabolic process;GO:0007093//mitotic cell cycle checkpoint;GO:0010452//histone H3-K36 methylation;GO:0010912//positive regulation of isomerase activity;GO:0010948//negative regulation of cell cycle process
MSTRG.45089.1	NW_011952609.1	103367	104391	+	ncbi_105394963	108538	120246	+	UPSTREAM	4146	LOC105394963	cytosolic 10-formyltetrahydrofolate dehydrogenase-like	Metabolism	Metabolism of cofactors and vitamins	ko00670//One carbon pool by folate	K00289	-	-	-
MSTRG.45137.1	NW_011952613.1	40255	41730	+	ncbi_105394984	26240	39880	+	DOWNSTREAM	374	LOC105394984	uncharacterized LOC105394984	Metabolism	Carbohydrate metabolism	ko00520//Amino sugar and nucleotide sugar metabolism	K00698	-	-	-
MSTRG.45178.3	NW_011952615.1	69735	73651	+	ncbi_105395016	57274	65172	-	UPSTREAM	4562	LOC105395016	pupal cuticle protein C1B-like	-	-	-	-	-	-	-
MSTRG.45178.3	NW_011952615.1	69735	73651	+	ncbi_105395005	66333	66929	+	DOWNSTREAM	2805	LOC105395005	uncharacterized LOC105395005	-	-	-	-	-	-	-
MSTRG.45181.1	NW_011952615.1	81517	82434	-	ncbi_105395018	89611	99895	+	UPSTREAM	7176	LOC105395018	calphotin-like	-	-	-	-	-	-	-
MSTRG.45198.1	NW_011952616.1	5680	8520	-	ncbi_105395022	15189	16557	-	DOWNSTREAM	6668	LOC105395022	ADP	-	-	-	-	GO:0019866//organelle inner membrane;GO:0031224//intrinsic component of membrane	-	GO:0044763//single-organism cellular process;GO:0051234//establishment of localization
MSTRG.45198.2	NW_011952616.1	5682	8520	-	ncbi_105395022	15189	16557	-	DOWNSTREAM	6668	LOC105395022	ADP	-	-	-	-	GO:0019866//organelle inner membrane;GO:0031224//intrinsic component of membrane	-	GO:0044763//single-organism cellular process;GO:0051234//establishment of localization
MSTRG.45205.1	NW_011952616.1	59535	60777	-	ncbi_105395023	52710	53705	+	DOWNSTREAM	5829	LOC105395023	regulation of enolase protein 1-like	-	-	-	-	-	-	-
MSTRG.45205.1	NW_011952616.1	59535	60777	-	ncbi_105395024	54153	57604	+	DOWNSTREAM	1930	LOC105395024	adrenodoxin-like	-	-	-	-	-	-	-
XR_961098.1	NW_011952623.1	53455	54577	-	ncbi_105395075	63437	70759	+	UPSTREAM	8859	LOC105395075	uncharacterized LOC105395075	-	-	-	-	-	-	-
MSTRG.45473.1	NW_011952632.1	60867	63336	+	ncbi_105395136	52434	60638	+	DOWNSTREAM	228	LOC105395136	golgin subfamily A member 4-like	-	-	-	-	-	-	-
MSTRG.45557.1	NW_011952637.1	31913	41424	-	ncbi_105395173	50315	68589	+	UPSTREAM	8890	LOC105395173	dynein beta chain	-	-	-	-	-	-	-
MSTRG.45556.3	NW_011952637.1	47910	49579	+	ncbi_105395173	50315	68589	+	UPSTREAM	735	LOC105395173	dynein beta chain	-	-	-	-	-	-	-
MSTRG.45601.1	NW_011952640.1	23813	24832	-	ncbi_105395187	12197	15304	+	DOWNSTREAM	8508	LOC105395187	probable cardiolipin synthase (CMP-forming)	Metabolism;Metabolism	Global and overview maps;Lipid metabolism	ko01100//Metabolic pathways;ko00564//Glycerophospholipid metabolism	K08744;K08744	-	-	-
MSTRG.45623.1	NW_011952642.1	16895	18254	+	ncbi_105395201	6694	16692	+	DOWNSTREAM	202	LOC105395201	uncharacterized LOC105395201	-	-	-	-	-	-	-
MSTRG.45625.1	NW_011952642.1	19975	20759	+	ncbi_105395201	6694	16692	+	DOWNSTREAM	3282	LOC105395201	uncharacterized LOC105395201	-	-	-	-	-	-	-
MSTRG.45657.1	NW_011952643.1	69437	69763	+	ncbi_105395209	77083	79452	+	UPSTREAM	7319	LOC105395209	facilitated trehalose transporter Tret1-like	-	-	-	-	-	-	-
MSTRG.45725.1	NW_011952647.1	78663	119632	+	ncbi_105395276	67840	70150	-	UPSTREAM	8512	LOC105395276	uncharacterized LOC105395276	-	-	-	-	-	-	-
MSTRG.45768.1	NW_011952650.1	61635	62236	-	ncbi_105395296	67477	75754	-	DOWNSTREAM	5240	LOC105395296	cytochrome c oxidase assembly protein COX15 homolog	Metabolism;Metabolism;Metabolism;Metabolism	Global and overview maps;Global and overview maps;Energy metabolism;Metabolism of cofactors and vitamins	ko01100//Metabolic pathways;ko01110//Biosynthesis of secondary metabolites;ko00190//Oxidative phosphorylation;ko00860//Porphyrin and chlorophyll metabolism	K02259;K02259;K02259;K02259	-	-	-
XR_961103.1	NW_011952656.1	100963	103309	-	ncbi_105395345	84802	97107	+	DOWNSTREAM	3855	LOC105395345	probable multidrug resistance-associated protein lethal(2)03659	Environmental Information Processing	Membrane transport	ko02010//ABC transporters	K05673	-	-	-
XR_961103.1	NW_011952656.1	100963	103309	-	ncbi_105395346	103415	117053	-	DOWNSTREAM	105	LOC105395346	acetyl-CoA carboxylase-like	Metabolism;Metabolism;Metabolism;Metabolism;Metabolism;Metabolism	Global and overview maps;Global and overview maps;Global and overview maps;Carbohydrate metabolism;Carbohydrate metabolism;Lipid metabolism	ko01100//Metabolic pathways;ko01110//Biosynthesis of secondary metabolites;ko01212//Fatty acid metabolism;ko00620//Pyruvate metabolism;ko00640//Propanoate metabolism;ko00061//Fatty acid biosynthesis	K11262;K11262;K11262;K11262;K11262;K11262	-	-	-
MSTRG.45959.1	NW_011952662.1	85527	89936	+	ncbi_105395436	63082	81710	-	UPSTREAM	3816	LOC105395436	uncharacterized LOC105395436	-	-	-	-	-	-	-
MSTRG.45959.2	NW_011952662.1	85527	89936	+	ncbi_105395436	63082	81710	-	UPSTREAM	3816	LOC105395436	uncharacterized LOC105395436	-	-	-	-	-	-	-
MSTRG.45970.1	NW_011952663.1	40467	41719	+	ncbi_105395441	45172	65565	+	UPSTREAM	3452	LOC105395441	nucleoporin NUP188 homolog	Genetic Information Processing	Translation	ko03013//RNA transport	K14311	-	-	-
MSTRG.46002.1	NW_011952666.1	48768	50180	-	ncbi_105395460	50672	58310	-	DOWNSTREAM	491	LOC105395460	homeobox protein SIX2-like	-	-	-	-	GO:0043231//intracellular membrane-bounded organelle	GO:0003677//DNA binding	GO:0010468//regulation of gene expression
MSTRG.46101.1	NW_011952674.1	76438	77196	-	ncbi_105395496	74159	75225	-	UPSTREAM	1212	LOC105395496	vegetative cell wall protein gp1-like	-	-	-	-	-	-	-
MSTRG.46101.1	NW_011952674.1	76438	77196	-	ncbi_105395498	79136	80927	-	DOWNSTREAM	1939	LOC105395498	vegetative cell wall protein gp1-like	-	-	-	-	-	-	-
MSTRG.46122.1	NW_011952675.1	45972	47805	+	ncbi_105395505	33104	36653	-	UPSTREAM	9318	LOC105395505	replication factor C subunit 2-like	Genetic Information Processing;Genetic Information Processing;Genetic Information Processing	Replication and repair;Replication and repair;Replication and repair	ko03420//Nucleotide excision repair;ko03030//DNA replication;ko03430//Mismatch repair	K10755;K10755;K10755	-	GO:0032550//purine ribonucleoside binding	GO:0006259//DNA metabolic process
MSTRG.46122.1	NW_011952675.1	45972	47805	+	ncbi_105395506	44735	45844	+	DOWNSTREAM	127	LOC105395506	uncharacterized LOC105395506	-	-	-	-	-	-	-
MSTRG.46176.1	NW_011952678.1	39212	40213	-	ncbi_105395530	49948	55891	+	UPSTREAM	9734	LOC105395530	fatty acyl-CoA reductase 1-like	Cellular Processes	Transport and catabolism	ko04146//Peroxisome	K13356	-	-	-
MSTRG.46219.1	NW_011952681.1	82544	83964	+	ncbi_105395546	77964	81704	+	DOWNSTREAM	839	LOC105395546	inner centromere protein-like	-	-	-	-	-	-	-
MSTRG.46255.2	NW_011952684.1	32352	63155	-	ncbi_105395562	63784	65948	+	UPSTREAM	628	LOC105395562	ropporin-1-like protein	-	-	-	-	-	-	-
MSTRG.46263.1	NW_011952684.1	86369	92179	-	ncbi_105395563	76811	84604	-	UPSTREAM	1764	LOC105395563	putative fatty acyl-CoA reductase CG5065	Cellular Processes	Transport and catabolism	ko04146//Peroxisome	K13356	-	-	-
MSTRG.46263.1	NW_011952684.1	86369	92179	-	ncbi_105395564	92259	104305	-	DOWNSTREAM	79	LOC105395564	putative fatty acyl-CoA reductase CG5065	Cellular Processes	Transport and catabolism	ko04146//Peroxisome	K13356	-	-	-
XR_961122.1	NW_011952687.1	11248	14472	-	ncbi_105395585	18537	28048	-	DOWNSTREAM	4064	LOC105395585	protein groucho-like	Environmental Information Processing;Environmental Information Processing	Signal transduction;Signal transduction	ko04310//Wnt signaling pathway;ko04330//Notch signaling pathway	K04497;K04497	-	-	-
XR_961122.1	NW_011952687.1	11248	14472	-	ncbi_105395583	14631	16536	-	DOWNSTREAM	158	LOC105395583	uncharacterized LOC105395583	-	-	-	-	-	-	-
MSTRG.46390.1	NW_011952697.1	16279	22896	+	ncbi_105395639	12212	14883	+	DOWNSTREAM	1395	LOC105395639	uncharacterized LOC105395639	-	-	-	-	-	-	-
MSTRG.46447.1	NW_011952701.1	40086	41586	-	ncbi_105395665	24513	39855	+	DOWNSTREAM	230	LOC105395665	myelin expression factor 2-like	-	-	-	-	-	-	-
MSTRG.46447.1	NW_011952701.1	40086	41586	-	ncbi_105395662	41608	49927	-	DOWNSTREAM	21	LOC105395662	protein FAM172A-like	-	-	-	-	-	-	-
MSTRG.46466.2	NW_011952703.1	46887	47216	+	ncbi_105395675	30881	46769	-	UPSTREAM	117	LOC105395675	protein unzipped	-	-	-	-	-	-	-
MSTRG.46481.1	NW_011952704.1	9249	10246	+	ncbi_105395679	9	5638	-	UPSTREAM	3610	LOC105395679	nucleosome-remodeling factor subunit NURF301	-	-	-	-	-	-	-
MSTRG.46481.1	NW_011952704.1	9249	10246	+	ncbi_105395683	16611	30988	-	DOWNSTREAM	6364	LOC105395683	peflin	-	-	-	-	-	-	-
MSTRG.46525.1	NW_011952707.1	71193	71929	+	ncbi_105395698	61844	69809	+	DOWNSTREAM	1383	LOC105395698	galectin-8-like	-	-	-	-	-	-	-
MSTRG.46526.1	NW_011952707.1	71452	71910	-	ncbi_105395698	61844	69809	+	DOWNSTREAM	1642	LOC105395698	galectin-8-like	-	-	-	-	-	-	-
MSTRG.46529.1	NW_011952707.1	83887	84637	+	MSTRG.46528	82200	83820	+	DOWNSTREAM	66	GlyP	PREDICTED: glycogen phosphorylase-like [Plutella xylostella]	Metabolism;Metabolism;Organismal Systems;Organismal Systems;Human Diseases;Cellular Processes	Global and overview maps;Carbohydrate metabolism;Endocrine system;Endocrine system;Endocrine and metabolic diseases;Cell growth and death	ko01100//Metabolic pathways;ko00500//Starch and sucrose metabolism;ko04910//Insulin signaling pathway;ko04922//Glucagon signaling pathway;ko04931//Insulin resistance;ko04217//Necroptosis	K00688;K00688;K00688;K00688;K00688;K00688	-	GO:0004645//phosphorylase activity;GO:0043168//anion binding	GO:0044238//primary metabolic process
MSTRG.46556.1	NW_011952710.1	11983	13141	+	ncbi_105395714	2002	9630	+	DOWNSTREAM	2352	LOC105395714	cell wall protein DAN4-like	-	-	-	-	-	-	-
MSTRG.46612.1	NW_011952714.1	58340	58901	-	ncbi_105395740	65155	69725	-	DOWNSTREAM	6253	LOC105395740	pollen-specific leucine-rich repeat extensin-like protein 1	-	-	-	-	-	-	-
XR_961129.1	NW_011952735.1	65749	67175	-	ncbi_105395880	70718	76309	-	DOWNSTREAM	3542	LOC105395880	E3 ubiquitin-protein ligase TRIM9-like	-	-	-	-	-	-	-
XR_961129.1	NW_011952735.1	65749	67175	-	ncbi_105395879	45069	65043	-	UPSTREAM	705	LOC105395879	puromycin-sensitive aminopeptidase-like protein	-	-	-	-	-	-	-
MSTRG.46815.1	NW_011952735.1	67760	69756	-	ncbi_105395880	70718	76309	-	DOWNSTREAM	961	LOC105395880	E3 ubiquitin-protein ligase TRIM9-like	-	-	-	-	-	-	-
MSTRG.46815.1	NW_011952735.1	67760	69756	-	ncbi_105395879	45069	65043	-	UPSTREAM	2716	LOC105395879	puromycin-sensitive aminopeptidase-like protein	-	-	-	-	-	-	-
MSTRG.46886.1	NW_011952742.1	41037	42043	+	ncbi_105395922	49689	81250	-	DOWNSTREAM	7645	LOC105395922	dnaJ homolog subfamily C member 13-like	-	-	-	-	-	-	-
MSTRG.46959.1	NW_011952749.1	31297	32345	-	ncbi_105395945	19371	29311	+	DOWNSTREAM	1985	LOC105395945	serine/threonine-protein phosphatase rdgC-like	Organismal Systems	Sensory system	ko04745//Phototransduction - fly	K13807	-	-	-
MSTRG.46959.1	NW_011952749.1	31297	32345	-	ncbi_105395943	36366	43360	-	DOWNSTREAM	4020	LOC105395943	uncharacterized LOC105395943	-	-	-	-	-	-	-
MSTRG.47005.1	NW_011952754.1	18077	18848	+	ncbi_105395965	899	16853	+	DOWNSTREAM	1223	LOC105395965	vinculin-like	-	-	-	-	-	-	-
MSTRG.47005.1	NW_011952754.1	18077	18848	+	ncbi_105395966	22532	75455	-	DOWNSTREAM	3683	LOC105395966	apolipophorins-like	-	-	-	-	-	-	-
MSTRG.47039.2	NW_011952759.1	15348	16432	-	ncbi_105396016	8114	14388	+	DOWNSTREAM	959	LOC105396016	1-phosphatidylinositol 4	Metabolism;Environmental Information Processing;Metabolism;Environmental Information Processing;Organismal Systems	Global and overview maps;Signal transduction;Carbohydrate metabolism;Signal transduction;Sensory system	ko01100//Metabolic pathways;ko04070//Phosphatidylinositol signaling system;ko00562//Inositol phosphate metabolism;ko04310//Wnt signaling pathway;ko04745//Phototransduction - fly	K05858;K05858;K05858;K05858;K05858	-	GO:0042578//phosphoric ester hydrolase activity;GO:0046872//metal ion binding;GO:0060089//molecular transducer activity	GO:0006629//lipid metabolic process;GO:0007165//signal transduction
MSTRG.47053.1	NW_011952760.1	60086	62375	-	ncbi_105396022	66997	70855	-	DOWNSTREAM	4621	LOC105396022	probable phospholipid hydroperoxide glutathione peroxidase	Metabolism;Metabolism	Metabolism of other amino acids;Lipid metabolism	ko00480//Glutathione metabolism;ko00590//Arachidonic acid metabolism	K00432;K00432	-	GO:0004601//peroxidase activity	GO:0006950//response to stress;GO:0044710//single-organism metabolic process
MSTRG.47053.1	NW_011952760.1	60086	62375	-	ncbi_105396023	71550	72704	+	UPSTREAM	9174	LOC105396023	iron-sulfur cluster assembly enzyme ISCU	-	-	-	-	-	GO:0051540//metal cluster binding	GO:0009058//biosynthetic process
MSTRG.47101.1	NW_011952765.1	69247	70064	+	ncbi_105396066	63388	68915	+	DOWNSTREAM	331	LOC105396066	uncharacterized LOC105396066	-	-	-	-	-	-	-
MSTRG.47178.1	NW_011952777.1	15763	20604	-	ncbi_105396132	5	11917	+	DOWNSTREAM	3845	LOC105396132	protein split ends-like	-	-	-	-	-	-	-
MSTRG.47204.2	NW_011952780.1	8998	9577	+	ncbi_105396143	13414	25909	-	DOWNSTREAM	3836	LOC105396143	protein lingerer-like	-	-	-	-	-	-	-
MSTRG.47212.1	NW_011952780.1	29569	30124	+	MSTRG.47209	26400	27490	+	DOWNSTREAM	2078	--	PREDICTED: GILT-like protein F37H8.5 [Papilio polytes]	-	-	-	-	-	-	-
MSTRG.47212.1	NW_011952780.1	29569	30124	+	ncbi_105396143	13414	25909	-	UPSTREAM	3659	LOC105396143	protein lingerer-like	-	-	-	-	-	-	-
XR_961137.1	NW_011952786.1	24643	26433	+	ncbi_105396180	17742	18361	-	UPSTREAM	6281	LOC105396180	translation machinery-associated protein 16 homolog	-	-	-	-	-	-	-
MSTRG.47275.1	NW_011952791.1	36434	37514	+	ncbi_105396213	38502	48438	-	DOWNSTREAM	987	LOC105396213	neurotrypsin-like	-	-	-	-	-	-	-
MSTRG.47312.1	NW_011952796.1	28229	28904	-	ncbi_105396232	20311	22763	-	UPSTREAM	5465	LOC105396232	cysteine sulfinic acid decarboxylase-like	Metabolism;Metabolism;Metabolism;Metabolism;Metabolism;Metabolism;Metabolism	Global and overview maps;Global and overview maps;Global and overview maps;Amino acid metabolism;Metabolism of other amino acids;Carbohydrate metabolism;Metabolism of other amino acids	ko01100//Metabolic pathways;ko01110//Biosynthesis of secondary metabolites;ko01120//Microbial metabolism in diverse environments;ko00250//Alanine, aspartate and glutamate metabolism;ko00410//beta-Alanine metabolism;ko00650//Butanoate metabolism;ko00430//Taurine and hypotaurine metabolism	K01580;K01580;K01580;K01580;K01580;K01580;K01580	-	-	-
MSTRG.47312.1	NW_011952796.1	28229	28904	-	ncbi_105396230	15457	19292	+	DOWNSTREAM	8936	LOC105396230	multiple C2 and transmembrane domain-containing protein 2-like	-	-	-	-	-	-	-
MSTRG.47319.1	NW_011952797.1	40080	42122	-	ncbi_105396238	43157	48999	+	UPSTREAM	1034	LOC105396238	uncharacterized LOC105396238	-	-	-	-	-	-	-
MSTRG.47320.1	NW_011952797.1	40086	42071	+	ncbi_105396238	43157	48999	+	UPSTREAM	1085	LOC105396238	uncharacterized LOC105396238	-	-	-	-	-	-	-
MSTRG.47366.2	NW_011952804.1	29480	30830	+	ncbi_105396270	36261	37859	+	UPSTREAM	5430	LOC105396270	ankyrin repeat domain-containing protein 49-like	-	-	-	-	-	-	-
MSTRG.47366.2	NW_011952804.1	29480	30830	+	ncbi_105396273	15926	29194	-	UPSTREAM	285	LOC105396273	longitudinals lacking protein	-	-	-	-	-	-	-
MSTRG.47466.1	NW_011952818.1	30542	30861	+	ncbi_105396320	26203	29416	+	DOWNSTREAM	1125	LOC105396320	pre-mRNA-splicing factor 18-like	Genetic Information Processing	Transcription	ko03040//Spliceosome	K12817	-	-	GO:0006396//RNA processing
MSTRG.47466.1	NW_011952818.1	30542	30861	+	ncbi_105396322	15381	26219	+	DOWNSTREAM	4322	LOC105396322	DNA mismatch repair protein Mlh3-like	Genetic Information Processing	Replication and repair	ko03430//Mismatch repair	K08739	-	-	-
MSTRG.47467.1	NW_011952818.1	36811	50143	+	ncbi_105396320	26203	29416	+	DOWNSTREAM	7394	LOC105396320	pre-mRNA-splicing factor 18-like	Genetic Information Processing	Transcription	ko03040//Spliceosome	K12817	-	-	GO:0006396//RNA processing
MSTRG.47485.1	NW_011952823.1	7992	9099	-	ncbi_105396359	3542	4423	+	DOWNSTREAM	3568	LOC105396359	cell wall protein DAN4-like	-	-	-	-	-	-	-
MSTRG.47498.1	NW_011952825.1	4411	9947	+	ncbi_105396368	18937	19842	+	UPSTREAM	8989	LOC105396368	putative nuclease HARBI1	-	-	-	-	-	-	-
MSTRG.47498.1	NW_011952825.1	4411	9947	+	ncbi_105396371	19945	21153	-	DOWNSTREAM	9997	LOC105396371	uncharacterized LOC105396371	-	-	-	-	-	-	-
MSTRG.47498.1	NW_011952825.1	4411	9947	+	ncbi_105396370	13997	17787	+	UPSTREAM	4049	LOC105396370	T-complex protein 1 subunit epsilon-like	-	-	-	-	GO:0044424//intracellular part	GO:0005515//protein binding;GO:0032550//purine ribonucleoside binding	GO:0044267//cellular protein metabolic process
XR_961141.1	NW_011952856.1	22248	40512	+	ncbi_105396499	8990	20306	-	UPSTREAM	1941	LOC105396499	membrane-associated guanylate kinase	-	-	-	-	-	-	-
MSTRG.47817.1	NW_011952880.1	4976	6204	-	ncbi_105396589	4	3306	-	UPSTREAM	1669	LOC105396589	serpin B6-like	-	-	-	-	-	-	-
MSTRG.47819.2	NW_011952880.1	19943	24214	-	ncbi_105396591	32810	42149	+	UPSTREAM	8595	LOC105396591	ralA-binding protein 1-like	-	-	-	-	-	-	-
MSTRG.47819.2	NW_011952880.1	19943	24214	-	ncbi_105396590	25037	32793	-	DOWNSTREAM	822	LOC105396590	golgin subfamily A member 5-like	-	-	-	-	-	-	-
MSTRG.47929.1	NW_011952905.1	11915	12220	-	ncbi_105396662	1166	2531	+	DOWNSTREAM	9383	LOC105396662	AP-1 complex subunit mu-like	Cellular Processes	Transport and catabolism	ko04142//Lysosome	K12398	-	-	-
MSTRG.48049.1	NW_011952935.1	13032	15012	-	ncbi_105396758	15933	35471	-	DOWNSTREAM	920	LOC105396758	uncharacterized LOC105396758	-	-	-	-	-	-	-
MSTRG.48175.2	NW_011952974.1	23265	24848	-	MSTRG.48173	13855	15605	-	UPSTREAM	7659	--	PREDICTED: Ca(2+)/calmodulin-responsive adenylate cyclase-like [Plutella xylostella]	-	-	-	-	-	-	-
MSTRG.48235.1	NW_011952987.1	23228	24168	+	ncbi_105396962	8	20785	+	DOWNSTREAM	2442	LOC105396962	uncharacterized LOC105396962	-	-	-	-	-	-	-
MSTRG.48291.1	NW_011953008.1	1	10840	+	ncbi_105397033	12147	25808	+	UPSTREAM	1306	LOC105397033	V-type proton ATPase subunit B	Metabolism;Metabolism;Cellular Processes	Global and overview maps;Energy metabolism;Transport and catabolism	ko01100//Metabolic pathways;ko00190//Oxidative phosphorylation;ko04145//Phagosome	K02147;K02147;K02147	GO:0033176//proton-transporting V-type ATPase complex	GO:0022857//transmembrane transporter activity	GO:0009150//purine ribonucleotide metabolic process;GO:0015988//energy coupled proton transmembrane transport, against electrochemical gradient
MSTRG.48290.2	NW_011953008.1	3362	11088	-	ncbi_105397033	12147	25808	+	UPSTREAM	1058	LOC105397033	V-type proton ATPase subunit B	Metabolism;Metabolism;Cellular Processes	Global and overview maps;Energy metabolism;Transport and catabolism	ko01100//Metabolic pathways;ko00190//Oxidative phosphorylation;ko04145//Phagosome	K02147;K02147;K02147	GO:0033176//proton-transporting V-type ATPase complex	GO:0022857//transmembrane transporter activity	GO:0009150//purine ribonucleotide metabolic process;GO:0015988//energy coupled proton transmembrane transport, against electrochemical gradient
XR_961146.1	NW_011953052.1	3209	4655	+	MSTRG.48443	1	2527	-	UPSTREAM	681	--	carboxylesterase clade H, member 1 precursor [Bombyx mori]	-	-	-	-	-	-	-
MSTRG.48448.2	NW_011953053.1	3463	4094	+	ncbi_105397177	9954	14490	+	UPSTREAM	5859	LOC105397177	uncharacterized LOC105397177	-	-	-	-	-	-	-
MSTRG.48474.1	NW_011953059.1	2058	2836	-	ncbi_105397185	3447	4524	-	DOWNSTREAM	610	LOC105397185	acyl-CoA-binding protein homolog	-	-	-	-	-	-	-
MSTRG.48474.1	NW_011953059.1	2058	2836	-	ncbi_105397186	5849	7992	-	DOWNSTREAM	3012	LOC105397186	putative acyl-CoA-binding protein	-	-	-	-	-	-	-
XR_961150.1	NW_011953065.1	18315	19484	-	ncbi_105397210	51	8623	-	UPSTREAM	9691	LOC105397210	protein mesh-like	-	-	-	-	GO:0031224//intrinsic component of membrane;GO:0044459//plasma membrane part;GO:0070160//occluding junction	-	GO:0031589//cell-substrate adhesion
MSTRG.48526.2	NW_011953067.1	1693	2398	-	ncbi_105397219	8208	9733	+	UPSTREAM	5809	LOC105397219	cyclin-dependent-like kinase 5	-	-	-	-	-	GO:0004672//protein kinase activity;GO:0032550//purine ribonucleoside binding	GO:0006464//cellular protein modification process;GO:0006796//phosphate-containing compound metabolic process
MSTRG.48526.2	NW_011953067.1	1693	2398	-	ncbi_105397220	9813	11583	-	DOWNSTREAM	7414	LOC105397220	probable GPI-anchored adhesin-like protein PGA55	Genetic Information Processing;Organismal Systems	Folding, sorting and degradation;Aging	ko04141//Protein processing in endoplasmic reticulum;ko04213//Longevity regulating pathway - multiple species	K09542;K09542	-	-	-
MSTRG.48559.1	NW_011953074.1	11945	13851	+	ncbi_105397235	390	2431	+	DOWNSTREAM	9513	LOC105397235	uncharacterized LOC105397235	Metabolism;Environmental Information Processing;Metabolism	Global and overview maps;Signal transduction;Carbohydrate metabolism	ko01100//Metabolic pathways;ko04070//Phosphatidylinositol signaling system;ko00562//Inositol phosphate metabolism	K18082;K18082;K18082	-	-	-
MSTRG.48559.1	NW_011953074.1	11945	13851	+	ncbi_105397238	22445	24165	+	UPSTREAM	8593	LOC105397238	aldo-keto reductase AKR2E4-like	Metabolism;Metabolism;Metabolism;Metabolism;Metabolism	Global and overview maps;Carbohydrate metabolism;Carbohydrate metabolism;Lipid metabolism;Carbohydrate metabolism	ko01100//Metabolic pathways;ko00040//Pentose and glucuronate interconversions;ko00052//Galactose metabolism;ko00561//Glycerolipid metabolism;ko00051//Fructose and mannose metabolism	K00011;K00011;K00011;K00011;K00011	-	-	-
MSTRG.48599.1	NW_011953082.1	20045	23905	+	ncbi_105397263	15155	17860	-	UPSTREAM	2184	LOC105397263	intraflagellar transport protein osm-1-like	-	-	-	-	-	-	-
XR_961154.1	NW_011953087.1	21993	22913	-	ncbi_105397267	3321	19790	+	DOWNSTREAM	2202	LOC105397267	midasin-like	Genetic Information Processing	Translation	ko03008//Ribosome biogenesis in eukaryotes	K14572	-	-	-
MSTRG.48677.1	NW_011953101.1	18785	19906	+	MSTRG.48676	2095	10766	+	DOWNSTREAM	8018	Dhc64C	PREDICTED: dynein heavy chain, cytoplasmic-like, partial [Plutella xylostella]	Cellular Processes;Organismal Systems;Human Diseases	Transport and catabolism;Excretory system;Infectious diseases	ko04145//Phagosome;ko04962//Vasopressin-regulated water reabsorption;ko05132//Salmonella infection	K10413;K10413;K10413	-	-	-
MSTRG.48677.1	NW_011953101.1	18785	19906	+	MSTRG.48678	21502	22765	+	UPSTREAM	1595	Dhc64C	Dynein heavy chain 64C, partial [Pararge aegeria]	Cellular Processes;Organismal Systems;Human Diseases	Transport and catabolism;Excretory system;Infectious diseases	ko04145//Phagosome;ko04962//Vasopressin-regulated water reabsorption;ko05132//Salmonella infection	K10413;K10413;K10413	-	-	-
MSTRG.49171.1	NW_011953266.1	4832	6488	+	ncbi_105397550	7132	11955	-	DOWNSTREAM	643	LOC105397550	alpha-2-macroglobulin receptor-associated protein-like	-	-	-	-	-	-	-
MSTRG.49272.3	NW_011953308.1	428	1340	-	ncbi_105397604	2908	9711	-	DOWNSTREAM	1567	LOC105397604	eukaryotic translation initiation factor 3 subunit A-like	-	-	-	-	-	-	-
MSTRG.49333.1	NW_011953346.1	8520	8999	+	ncbi_105397639	296	4166	+	DOWNSTREAM	4353	LOC105397639	lipoprotein lipase-like	-	-	-	-	-	-	-
MSTRG.49333.1	NW_011953346.1	8520	8999	+	ncbi_105397640	4670	8060	+	DOWNSTREAM	459	LOC105397640	pancreatic triacylglycerol lipase-like	-	-	-	-	-	-	-
