# Supplementary material for: Analysis of Long Non-Coding RNA-Mediated Regulatory Networks of Plutella xylostella in Response to Metarhizium anisopliae Infection
Source: Insects. 2022 Oct 9;13(10):916. doi: 10.3390/insects13100916 (PMC9604237; doi:10.3390/insects13100916)
Supplement: Supplementary file 1 [file insects-13-00916-s001.zip › Table S5 Differentially expressed cis-lncRNAs in Metarhizium anisopliae infected fat body tissues of Plutella xylostella at Px72hCK vs Px72hT.xlsx]

## Sheet: cis_diff.annot (3)
Table S5 Differentially expressed cis-lncRNAs in Metarhizium anisopliae-infected fat body tissues of Plutella xylostella at Px72hCK vs Px72hT
lncRNA_ID	chr	lncRNA_start	lncRNA_end	lncRNA_strand	GeneID	Gene_start	Gene_end	Gene_strand	up/down_Stream	distance	Symbol	Description	KEGG_A_class	KEGG_B_class	Pathway	K_ID	GO Component	GO Function	GO Process
MSTRG.94.1	NW_011952010.1	870312	874028	-	ncbi_105398664	881146	884912	-	DOWNSTREAM	7117	LOC105398664	presequence protease	-	-	-	-	-	-	-
MSTRG.115.1	NW_011952010.1	1048075	1110498	+	ncbi_105380577	1117757	1130119	-	DOWNSTREAM	7258	LOC105380577	low density lipoprotein receptor adapter protein 1	-	-	-	-	-	-	-
MSTRG.149.1	NW_011952010.1	1394468	1395196	+	ncbi_105382430	1402426	1403455	+	UPSTREAM	7229	LOC105382430	uncharacterized LOC105382430	-	-	-	-	-	-	-
MSTRG.184.1	NW_011952010.1	1810987	1813691	-	ncbi_105383814	1772675	1804572	+	DOWNSTREAM	6414	LOC105383814	corticotropin-releasing factor-binding protein	-	-	-	-	-	-	-
MSTRG.190.2	NW_011952010.1	1873892	1880239	-	ncbi_105383901	1812371	1868500	-	UPSTREAM	5391	LOC105383901	acetylcholinesterase-like	Metabolism	Lipid metabolism	ko00564//Glycerophospholipid metabolism	K01049	-	GO:0004104//cholinesterase activity	-
MSTRG.190.4	NW_011952010.1	1873910	1880210	-	ncbi_105383901	1812371	1868500	-	UPSTREAM	5409	LOC105383901	acetylcholinesterase-like	Metabolism	Lipid metabolism	ko00564//Glycerophospholipid metabolism	K01049	-	GO:0004104//cholinesterase activity	-
MSTRG.228.1	NW_011952010.1	2256111	2256540	-	ncbi_105393175	2247837	2252417	+	DOWNSTREAM	3693	LOC105393175	membrane alanyl aminopeptidase-like	Metabolism;Metabolism	Global and overview maps;Metabolism of other amino acids	ko01100//Metabolic pathways;ko00480//Glutathione metabolism	K11140;K11140	-	-	-
MSTRG.228.1	NW_011952010.1	2256111	2256540	-	ncbi_105386349	2234211	2247597	+	DOWNSTREAM	8513	LOC105386349	membrane alanyl aminopeptidase-like	Metabolism;Metabolism	Global and overview maps;Metabolism of other amino acids	ko01100//Metabolic pathways;ko00480//Glutathione metabolism	K11140;K11140	-	-	-
MSTRG.274.1	NW_011952010.1	2724655	2725981	-	ncbi_105387924	2715557	2717957	+	DOWNSTREAM	6697	LOC105387924	UPF0691 protein C9orf116	-	-	-	-	-	-	-
MSTRG.274.1	NW_011952010.1	2724655	2725981	-	ncbi_105394127	2728619	2797466	-	DOWNSTREAM	2637	LOC105394127	synapsin	-	-	-	-	-	-	-
MSTRG.325.1	NW_011952010.1	3073565	3077997	-	ncbi_105389990	3083831	3085624	+	UPSTREAM	5833	LOC105389990	E3 ubiquitin-protein ligase RNF181-like	-	-	-	-	-	-	-
MSTRG.325.1	NW_011952010.1	3073565	3077997	-	ncbi_105395304	3086021	3107148	+	UPSTREAM	8023	LOC105395304	uncharacterized LOC105395304	-	-	-	-	-	-	-
MSTRG.442.1	NW_011952011.1	985354	986789	-	ncbi_105380192	939428	979425	-	UPSTREAM	5928	LOC105380192	F-BAR and double SH3 domains protein 2	-	-	-	-	-	-	-
MSTRG.442.2	NW_011952011.1	985354	986789	-	ncbi_105380192	939428	979425	-	UPSTREAM	5928	LOC105380192	F-BAR and double SH3 domains protein 2	-	-	-	-	-	-	-
MSTRG.509.1	NW_011952011.1	1681970	1682537	+	ncbi_105398257	1676449	1678051	+	DOWNSTREAM	3918	LOC105398257	trypsin	Environmental Information Processing	Signaling molecules and interaction	ko04080//Neuroactive ligand-receptor interaction	K01312	-	-	-
MSTRG.509.1	NW_011952011.1	1681970	1682537	+	ncbi_105398249	1678973	1680778	+	DOWNSTREAM	1191	LOC105398249	trypsin	-	-	-	-	-	-	-
MSTRG.509.1	NW_011952011.1	1681970	1682537	+	ncbi_105380337	1659146	1675232	+	DOWNSTREAM	6737	LOC105380337	uncharacterized LOC105380337	-	-	-	-	-	-	-
MSTRG.509.1	NW_011952011.1	1681970	1682537	+	ncbi_105398265	1669367	1672977	+	DOWNSTREAM	8992	LOC105398265	trypsin CFT-1-like	Environmental Information Processing	Signaling molecules and interaction	ko04080//Neuroactive ligand-receptor interaction	K01312	-	-	-
MSTRG.513.1	NW_011952011.1	1688332	1696915	-	ncbi_105398249	1678973	1680778	+	DOWNSTREAM	7553	LOC105398249	trypsin	-	-	-	-	-	-	-
MSTRG.513.1	NW_011952011.1	1688332	1696915	-	ncbi_105398284	1697329	1703064	+	UPSTREAM	413	LOC105398284	uncharacterized LOC105398284	-	-	-	-	-	-	-
MSTRG.531.1	NW_011952011.1	1817047	1817587	-	MSTRG.525	1802551	1812252	-	UPSTREAM	4794	pif1	ATP-dependent DNA helicase PIF1 [Folsomia candida]	-	-	-	-	-	-	-
MSTRG.531.1	NW_011952011.1	1817047	1817587	-	ncbi_105380368	1826385	1827424	+	UPSTREAM	8797	LOC105380368	DNA repair protein XRCC3	Genetic Information Processing	Replication and repair	ko03440//Homologous recombination	K10880	-	-	-
MSTRG.541.2	NW_011952011.1	1895218	1895849	-	ncbi_105398410	1885138	1893029	-	UPSTREAM	2188	LOC105398410	alpha-tocopherol transfer protein-like	-	-	-	-	-	-	-
MSTRG.541.2	NW_011952011.1	1895218	1895849	-	ncbi_105398419	1896243	1908616	-	DOWNSTREAM	393	LOC105398419	alpha-tocopherol transfer protein-like	-	-	-	-	-	-	-
XR_961222.1	NW_011952011.1	1996320	1997802	-	ncbi_105398477	1993804	1995090	-	UPSTREAM	1229	LOC105398477	uncharacterized LOC105398477	-	-	-	-	-	-	-
XR_961222.1	NW_011952011.1	1996320	1997802	-	ncbi_105380391	1999299	2009732	+	UPSTREAM	1496	LOC105380391	polycomb group protein Psc-like	-	-	-	-	-	-	-
MSTRG.558.1	NW_011952011.1	2053673	2054542	-	ncbi_105398509	2042048	2046577	-	UPSTREAM	7095	LOC105398509	U2 small nuclear ribonucleoprotein auxiliary factor 35 kDa subunit-related protein 2	-	-	-	-	-	-	-
MSTRG.558.1	NW_011952011.1	2053673	2054542	-	ncbi_105398551	2055876	2067937	-	DOWNSTREAM	1333	LOC105398551	CDK5 regulatory subunit-associated protein 2-like	-	-	-	-	-	-	-
XR_961233.1	NW_011952011.1	2838078	2839142	-	ncbi_105398792	2835483	2837197	-	UPSTREAM	880	LOC105398792	mucin-1-like	-	-	-	-	-	-	-
XR_961233.1	NW_011952011.1	2838078	2839142	-	ncbi_105398810	2839900	2845049	+	UPSTREAM	757	LOC105398810	uncharacterized LOC105398810	-	-	-	-	-	-	-
XR_961233.1	NW_011952011.1	2838078	2839142	-	ncbi_105398770	2779888	2832780	+	DOWNSTREAM	5297	LOC105398770	uncharacterized LOC105398770	-	-	-	-	-	-	-
XR_961233.1	NW_011952011.1	2838078	2839142	-	ncbi_105398828	2845122	2857293	-	DOWNSTREAM	5979	LOC105398828	uncharacterized LOC105398828	-	-	-	-	-	-	-
MSTRG.653.1	NW_011952011.1	3041411	3070798	+	ncbi_105380495	3080348	3082269	+	UPSTREAM	9549	LOC105380495	uncharacterized LOC105380495	-	-	-	-	-	-	-
MSTRG.654.1	NW_011952011.1	3043883	3045151	-	ncbi_105380034	3046085	3079886	-	DOWNSTREAM	933	LOC105380034	growth arrest-specific protein 8	-	-	-	-	-	-	-
MSTRG.655.1	NW_011952011.1	3045342	3075506	-	ncbi_105380495	3080348	3082269	+	UPSTREAM	4841	LOC105380495	uncharacterized LOC105380495	-	-	-	-	-	-	-
MSTRG.655.2	NW_011952011.1	3073516	3074863	-	ncbi_105380495	3080348	3082269	+	UPSTREAM	5484	LOC105380495	uncharacterized LOC105380495	-	-	-	-	-	-	-
MSTRG.840.1	NW_011952012.1	1378302	1382832	-	ncbi_105381814	1294901	1376266	+	DOWNSTREAM	2035	LOC105381814	visual system homeobox 2-like	-	-	-	-	-	-	-
XR_960472.1	NW_011952012.1	1529134	1530487	+	MSTRG.854	1523966	1525825	+	DOWNSTREAM	3308	--	zinc finger BED domain-containing protein RICESLEEPER 2-like [Spodoptera litura]	-	-	-	-	-	-	-
MSTRG.857.1	NW_011952012.1	1533177	1535166	+	MSTRG.854	1523966	1525825	+	DOWNSTREAM	7351	--	zinc finger BED domain-containing protein RICESLEEPER 2-like [Spodoptera litura]	-	-	-	-	-	-	-
MSTRG.881.2	NW_011952012.1	1697941	1699348	-	ncbi_105381104	1688944	1696523	-	UPSTREAM	1417	LOC105381104	uncharacterized LOC105381104	-	-	-	-	-	-	-
MSTRG.896.1	NW_011952012.1	1814865	1817919	-	MSTRG.897	1817972	1821242	-	DOWNSTREAM	52	N	AAEL000130-PA [Aedes aegypti]	-	-	-	-	-	-	-
MSTRG.927.1	NW_011952012.1	1989671	1990454	+	ncbi_105381155	1903201	1988359	-	UPSTREAM	1311	LOC105381155	dynein heavy chain 5	-	-	-	-	GO:0005875//microtubule associated complex	GO:0003774//motor activity;GO:0032550//purine ribonucleoside binding	GO:0007017//microtubule-based process
MSTRG.1024.1	NW_011952012.1	2753102	2756999	+	ncbi_105381626	2745252	2748372	-	UPSTREAM	4729	LOC105381626	chromobox protein homolog 1-like	-	-	-	-	-	-	-
MSTRG.1047.1	NW_011952013.1	206013	221557	+	ncbi_105382210	190567	201862	+	DOWNSTREAM	4150	LOC105382210	ATP-binding cassette sub-family G member 5	-	-	-	-	-	GO:0016787//hydrolase activity	-
MSTRG.1054.1	NW_011952013.1	451554	455932	-	ncbi_105382256	456677	463433	+	UPSTREAM	744	LOC105382256	uncharacterized LOC105382256	-	-	-	-	-	-	-
MSTRG.1068.2	NW_011952013.1	572848	573571	-	ncbi_105382296	560748	569150	-	UPSTREAM	3697	LOC105382296	protein quiver-like	-	-	-	-	-	-	-
XR_960535.1	NW_011952013.1	1345564	1346957	-	ncbi_105383232	1337838	1343095	-	UPSTREAM	2468	LOC105383232	XK-related protein 7-like	-	-	-	-	-	-	-
XR_960535.1	NW_011952013.1	1345564	1346957	-	ncbi_105382476	1350777	1357756	-	DOWNSTREAM	3819	LOC105382476	vacuolar protein sorting-associated protein 28 homolog	Cellular Processes	Transport and catabolism	ko04144//Endocytosis	K12184	-	-	-
MSTRG.1177.1	NW_011952013.1	1827093	1827985	+	ncbi_105382627	1813363	1817160	-	UPSTREAM	9932	LOC105382627	traB domain-containing protein-like	-	-	-	-	-	-	-
MSTRG.1177.1	NW_011952013.1	1827093	1827985	+	ncbi_105383349	1820226	1826899	-	UPSTREAM	193	LOC105383349	traB domain-containing protein-like	-	-	-	-	-	-	-
MSTRG.1177.1	NW_011952013.1	1827093	1827985	+	ncbi_105382659	1829682	1840473	+	UPSTREAM	1696	LOC105382659	1-acyl-sn-glycerol-3-phosphate acyltransferase gamma-like	Metabolism;Metabolism;Metabolism;Metabolism	Global and overview maps;Global and overview maps;Lipid metabolism;Lipid metabolism	ko01100//Metabolic pathways;ko01110//Biosynthesis of secondary metabolites;ko00564//Glycerophospholipid metabolism;ko00561//Glycerolipid metabolism	K13523;K13523;K13523;K13523	-	-	-
MSTRG.1243.1	NW_011952014.1	8145	8910	-	ncbi_105383520	11140	19034	-	DOWNSTREAM	2229	LOC105383520	probable multidrug resistance-associated protein lethal(2)03659	Environmental Information Processing	Membrane transport	ko02010//ABC transporters	K05673	-	-	-
MSTRG.1256.1	NW_011952014.1	156736	157573	+	ncbi_105383558	160316	174678	-	DOWNSTREAM	2742	LOC105383558	ATP-dependent RNA helicase bel	-	-	-	-	-	-	-
MSTRG.1376.1	NW_011952014.1	1840080	1840483	+	ncbi_105383949	1830044	1835800	-	UPSTREAM	4279	LOC105383949	protein Peter pan	-	-	-	-	-	-	-
MSTRG.1413.1	NW_011952014.1	2157779	2159096	-	ncbi_105384130	2165979	2167472	+	UPSTREAM	6882	LOC105384130	uncharacterized LOC105384130	-	-	-	-	-	-	-
MSTRG.1413.1	NW_011952014.1	2157779	2159096	-	ncbi_105384605	2140707	2150543	-	UPSTREAM	7235	LOC105384605	organic cation transporter protein-like	-	-	-	-	-	-	-
MSTRG.1457.1	NW_011952015.1	24663	25858	+	ncbi_105385433	618	16989	+	DOWNSTREAM	7673	LOC105385433	succinate dehydrogenase [ubiquinone] flavoprotein subunit	Metabolism;Metabolism;Metabolism;Metabolism;Metabolism;Metabolism;Metabolism	Global and overview maps;Global and overview maps;Global and overview maps;Global and overview maps;Global and overview maps;Energy metabolism;Carbohydrate metabolism	ko01100//Metabolic pathways;ko01110//Biosynthesis of secondary metabolites;ko01130//Biosynthesis of antibiotics;ko01120//Microbial metabolism in diverse environments;ko01200//Carbon metabolism;ko00190//Oxidative phosphorylation;ko00020//Citrate cycle (TCA cycle)	K00234;K00234;K00234;K00234;K00234;K00234;K00234	-	GO:0000166//nucleotide binding;GO:0016491//oxidoreductase activity	GO:0006091//generation of precursor metabolites and energy;GO:0044710//single-organism metabolic process
MSTRG.1513.1	NW_011952015.1	738387	739083	+	ncbi_105385505	720364	738316	+	DOWNSTREAM	70	LOC105385505	titin	-	-	-	-	-	-	-
MSTRG.1528.1	NW_011952015.1	840775	843704	+	ncbi_105384905	835715	838494	+	DOWNSTREAM	2280	LOC105384905	serine/threonine-protein phosphatase 2B catalytic subunit 2-like	Environmental Information Processing	Signal transduction	ko04310//Wnt signaling pathway	K04348	-	GO:0003824//catalytic activity	GO:0006796//phosphate-containing compound metabolic process
MSTRG.1528.1	NW_011952015.1	840775	843704	+	ncbi_105385516	847978	860884	-	DOWNSTREAM	4273	LOC105385516	vigilin	-	-	-	-	-	-	-
MSTRG.1599.1	NW_011952015.1	1695305	1696639	+	ncbi_105385640	1688423	1691498	+	DOWNSTREAM	3806	LOC105385640	trypsin	Environmental Information Processing	Signaling molecules and interaction	ko04080//Neuroactive ligand-receptor interaction	K01312	-	-	-
MSTRG.1877.1	NW_011952016.1	1853873	1856455	-	ncbi_105386595	1843408	1850892	+	DOWNSTREAM	2980	LOC105386595	uncharacterized LOC105386595	-	-	-	-	-	-	-
MSTRG.1877.1	NW_011952016.1	1853873	1856455	-	ncbi_105386618	1859748	1861222	-	DOWNSTREAM	3292	LOC105386618	uncharacterized LOC105386618	-	-	-	-	-	-	-
MSTRG.1877.1	NW_011952016.1	1853873	1856455	-	ncbi_105387050	1862229	1893684	-	DOWNSTREAM	5773	LOC105387050	interference hedgehog-like	-	-	-	-	-	-	-
MSTRG.1906.2	NW_011952016.1	2287591	2291041	-	ncbi_105386705	2279951	2287512	+	DOWNSTREAM	78	LOC105386705	spermine oxidase-like	Genetic Information Processing	Replication and repair	ko03410//Base excision repair	K02330	-	-	-
MSTRG.1906.2	NW_011952016.1	2287591	2291041	-	ncbi_105386679	2274589	2279148	+	DOWNSTREAM	8442	LOC105386679	DNA polymerase beta-like	Genetic Information Processing	Replication and repair	ko03410//Base excision repair	K02330	-	-	-
MSTRG.1925.1	NW_011952016.1	2411589	2413104	-	ncbi_105386768	2413517	2416347	-	DOWNSTREAM	412	LOC105386768	trypsin	Environmental Information Processing	Signaling molecules and interaction	ko04080//Neuroactive ligand-receptor interaction	K01312	-	GO:0016787//hydrolase activity	-
MSTRG.1925.1	NW_011952016.1	2411589	2413104	-	ncbi_105386788	2390015	2410449	+	DOWNSTREAM	1139	LOC105386788	another transcription unit protein	-	-	-	-	-	-	-
MSTRG.1943.1	NW_011952017.1	93826	101706	+	ncbi_105388362	109891	127146	-	DOWNSTREAM	8184	LOC105388362	chromodomain-helicase-DNA-binding protein 7-like	-	-	-	-	-	-	-
MSTRG.2063.1	NW_011952017.1	1130137	1130736	-	ncbi_105388573	1135719	1137651	+	UPSTREAM	4982	LOC105388573	uncharacterized LOC105388573	-	-	-	-	-	-	-
MSTRG.2169.1	NW_011952017.1	2043520	2044345	+	ncbi_105388260	1968911	2043459	-	UPSTREAM	60	LOC105388260	uncharacterized LOC105388260	-	-	-	-	GO:0031224//intrinsic component of membrane	-	GO:0007166//cell surface receptor signaling pathway
MSTRG.2319.1	NW_011952018.1	1328432	1329065	+	ncbi_105389051	1312369	1321503	+	DOWNSTREAM	6928	LOC105389051	4-coumarate--CoA ligase 1-like	-	-	-	-	-	-	-
MSTRG.2344.2	NW_011952018.1	1473332	1474566	-	ncbi_105389121	1477623	1479296	+	UPSTREAM	3056	LOC105389121	tektin-4-like	-	-	-	-	-	-	-
MSTRG.2357.1	NW_011952018.1	1611372	1613432	-	ncbi_105389217	1614937	1616417	-	DOWNSTREAM	1504	LOC105389217	ovalbumin-related protein X-like	-	-	-	-	-	-	-
MSTRG.2357.1	NW_011952018.1	1611372	1613432	-	ncbi_105389206	1616493	1618255	+	UPSTREAM	3060	LOC105389206	serpin B5-like	-	-	-	-	-	-	-
MSTRG.2357.1	NW_011952018.1	1611372	1613432	-	ncbi_105389198	1596899	1608337	-	UPSTREAM	3034	LOC105389198	phytanoyl-CoA dioxygenase	Cellular Processes	Transport and catabolism	ko04146//Peroxisome	K00477	-	-	-
MSTRG.2465.1	NW_011952019.1	202133	204280	-	ncbi_105390756	173916	193784	-	UPSTREAM	8348	LOC105390756	synaptic vesicle 2-related protein-like	-	-	-	-	-	-	-
MSTRG.2660.1	NW_011952019.1	1727974	1729468	-	ncbi_105390674	1737467	1740714	+	UPSTREAM	7998	LOC105390674	exosome complex component RRP45	Genetic Information Processing	Folding, sorting and degradation	ko03018//RNA degradation	K03678	-	-	-
XR_960923.1	NW_011952020.1	457132	461098	-	ncbi_105391819	461821	470194	+	UPSTREAM	722	LOC105391819	probable protein phosphatase 2C 11	-	-	-	-	-	-	-
XR_960923.1	NW_011952020.1	457132	461098	-	ncbi_105391075	469858	473848	-	DOWNSTREAM	8759	LOC105391075	intraflagellar transport protein 20 homolog	-	-	-	-	-	-	-
MSTRG.2751.1	NW_011952020.1	547499	548984	-	ncbi_105391150	526548	537521	-	UPSTREAM	9977	LOC105391150	uncharacterized LOC105391150	-	-	-	-	-	-	-
MSTRG.2751.1	NW_011952020.1	547499	548984	-	ncbi_105391826	544487	547243	+	DOWNSTREAM	255	LOC105391826	Golgi reassembly-stacking protein 2	-	-	-	-	-	-	-
MSTRG.2751.1	NW_011952020.1	547499	548984	-	ncbi_105391161	537788	544251	-	UPSTREAM	3247	LOC105391161	hyccin	-	-	-	-	-	-	-
MSTRG.2758.1	NW_011952020.1	587628	590134	-	ncbi_105391195	578989	581870	+	DOWNSTREAM	5757	LOC105391195	tRNA-splicing ligase RtcB homolog	-	-	-	-	-	-	-
MSTRG.2758.1	NW_011952020.1	587628	590134	-	ncbi_105391230	590273	616181	-	DOWNSTREAM	138	LOC105391230	sodium- and chloride-dependent GABA transporter ine	-	-	-	-	-	-	-
XR_960928.1	NW_011952020.1	1056938	1127942	-	ncbi_105391930	1052080	1056656	-	UPSTREAM	281	LOC105391930	uncharacterized LOC105391930	-	-	-	-	-	-	-
MSTRG.2814.1	NW_011952020.1	1282526	1285768	-	ncbi_105391978	1275405	1279998	-	UPSTREAM	2527	LOC105391978	toll-like receptor 3	-	-	-	-	-	-	-
MSTRG.2825.1	NW_011952020.1	1360124	1362898	-	ncbi_105391374	1355900	1358272	+	DOWNSTREAM	1851	LOC105391374	elongation factor 1-alpha	Genetic Information Processing	Translation	ko03013//RNA transport	K03231	GO:0044424//intracellular part	GO:0008135//translation factor activity, RNA binding;GO:0017111//nucleoside-triphosphatase activity;GO:0032550//purine ribonucleoside binding	GO:0034645//cellular macromolecule biosynthetic process
MSTRG.2825.1	NW_011952020.1	1360124	1362898	-	ncbi_105391385	1363737	1374329	-	DOWNSTREAM	838	LOC105391385	protein disulfide-isomerase A3	Genetic Information Processing	Folding, sorting and degradation	ko04141//Protein processing in endoplasmic reticulum	K08056	GO:0043231//intracellular membrane-bounded organelle	GO:0016740//transferase activity	GO:0019725//cellular homeostasis;GO:0044267//cellular protein metabolic process
MSTRG.2846.1	NW_011952020.1	1498733	1499994	-	ncbi_105391449	1500189	1505735	+	UPSTREAM	194	LOC105391449	phospholipid scramblase 2-like	-	-	-	-	-	-	-
MSTRG.2846.1	NW_011952020.1	1498733	1499994	-	ncbi_105392015	1505876	1512336	+	UPSTREAM	5881	LOC105392015	ankyrin repeat and MYND domain-containing protein 1-like	-	-	-	-	-	-	-
MSTRG.2854.1	NW_011952020.1	1547374	1548820	+	ncbi_105391472	1519727	1539945	-	UPSTREAM	7428	LOC105391472	protein tyrosine phosphatase type IVA 1	-	-	-	-	-	GO:0004721//phosphoprotein phosphatase activity	GO:0006796//phosphate-containing compound metabolic process
MSTRG.2905.1	NW_011952020.1	2268549	2269290	-	ncbi_105391746	2267497	2268346	+	DOWNSTREAM	202	LOC105391746	NADH dehydrogenase [ubiquinone] 1 alpha subcomplex subunit 5	Metabolism;Metabolism	Global and overview maps;Energy metabolism	ko01100//Metabolic pathways;ko00190//Oxidative phosphorylation	K03949;K03949	-	GO:0016491//oxidoreductase activity	GO:0022900//electron transport chain
MSTRG.2905.1	NW_011952020.1	2268549	2269290	-	ncbi_105391753	2269728	2271080	-	DOWNSTREAM	437	LOC105391753	uncharacterized protein C45G9.7	-	-	-	-	-	-	-
MSTRG.3123.1	NW_011952022.1	608861	609424	+	ncbi_105393035	613254	619189	+	UPSTREAM	3829	LOC105393035	translation initiation factor eIF-2B subunit delta	Genetic Information Processing	Translation	ko03013//RNA transport	K03680	-	-	-
MSTRG.3123.2	NW_011952022.1	608922	610333	+	ncbi_105393035	613254	619189	+	UPSTREAM	2920	LOC105393035	translation initiation factor eIF-2B subunit delta	Genetic Information Processing	Translation	ko03013//RNA transport	K03680	-	-	-
MSTRG.3124.2	NW_011952022.1	609075	610295	-	ncbi_105393035	613254	619189	+	UPSTREAM	2958	LOC105393035	translation initiation factor eIF-2B subunit delta	Genetic Information Processing	Translation	ko03013//RNA transport	K03680	-	-	-
MSTRG.3127.1	NW_011952022.1	621226	622338	+	ncbi_105393035	613254	619189	+	DOWNSTREAM	2036	LOC105393035	translation initiation factor eIF-2B subunit delta	Genetic Information Processing	Translation	ko03013//RNA transport	K03680	-	-	-
MSTRG.3130.1	NW_011952022.1	636927	651928	+	ncbi_105393589	651983	672579	+	UPSTREAM	54	LOC105393589	solute carrier organic anion transporter family member 5A1-like	-	-	-	-	-	-	-
XR_961006.1	NW_011952022.1	642132	651928	+	ncbi_105393589	651983	672579	+	UPSTREAM	54	LOC105393589	solute carrier organic anion transporter family member 5A1-like	-	-	-	-	-	-	-
MSTRG.3218.1	NW_011952022.1	1596205	1597799	+	MSTRG.3215	1585639	1596073	+	DOWNSTREAM	131	pif1	ATP-dependent DNA helicase PIF1 [Folsomia candida]	-	-	-	-	-	-	-
XR_961064.1	NW_011952023.1	1660241	1689618	-	ncbi_105394379	1697477	1796509	+	UPSTREAM	7858	LOC105394379	probable nuclear hormone receptor HR3	-	-	-	-	GO:0043231//intracellular membrane-bounded organelle	GO:0003677//DNA binding;GO:0004879//RNA polymerase II transcription factor activity, ligand-activated sequence-specific DNA binding;GO:0038023//signaling receptor activity;GO:0046914//transition metal ion binding	GO:0009755//hormone-mediated signaling pathway;GO:0009987//cellular process;GO:0010468//regulation of gene expression;GO:0034645//cellular macromolecule biosynthetic process
MSTRG.3361.1	NW_011952023.1	1789228	1790576	-	ncbi_105394445	1799929	1807889	+	UPSTREAM	9352	LOC105394445	androgen-dependent TFPI-regulating protein-like	-	-	-	-	-	-	-
XR_961065.1	NW_011952023.1	1789228	1791880	-	ncbi_105394445	1799929	1807889	+	UPSTREAM	8048	LOC105394445	androgen-dependent TFPI-regulating protein-like	-	-	-	-	-	-	-
MSTRG.3378.2	NW_011952023.1	1982898	1983316	-	ncbi_105394750	1973174	1977627	-	UPSTREAM	5270	LOC105394750	trithorax group protein osa-like	-	-	-	-	-	-	-
MSTRG.3403.1	NW_011952024.1	167283	169118	-	ncbi_105395375	169837	172344	-	DOWNSTREAM	718	LOC105395375	alpha-N-acetylglucosaminidase	Metabolism;Cellular Processes;Metabolism	Global and overview maps;Transport and catabolism;Glycan biosynthesis and metabolism	ko01100//Metabolic pathways;ko04142//Lysosome;ko00531//Glycosaminoglycan degradation	K01205;K01205;K01205	-	-	-
MSTRG.3422.1	NW_011952024.1	334380	335127	-	ncbi_105394876	339298	340123	-	DOWNSTREAM	4170	LOC105394876	uncharacterized LOC105394876	-	-	-	-	GO:0044421//extracellular region part	-	GO:0001906//cell killing;GO:0009620//response to fungus;GO:0042742//defense response to bacterium
MSTRG.3422.1	NW_011952024.1	334380	335127	-	ncbi_105394887	340786	350521	+	UPSTREAM	5658	LOC105394887	NCK-interacting protein with SH3 domain	-	-	-	-	-	-	-
MSTRG.3430.1	NW_011952024.1	355578	360584	-	ncbi_105394887	340786	350521	+	DOWNSTREAM	5056	LOC105394887	NCK-interacting protein with SH3 domain	-	-	-	-	-	-	-
MSTRG.3502.1	NW_011952024.1	841274	849365	-	MSTRG.3503	852452	854038	-	DOWNSTREAM	3086	--	endonuclease-reverse transcriptase [Bombyx mori]	-	-	-	-	-	-	-
MSTRG.3529.1	NW_011952024.1	1108409	1109525	+	ncbi_105395000	1112740	1117333	+	UPSTREAM	3214	LOC105395000	SH3 domain-binding glutamic acid-rich protein homolog	-	-	-	-	-	-	-
MSTRG.3531.1	NW_011952024.1	1118585	1119194	+	MSTRG.3532	1120969	1122725	+	UPSTREAM	1774	--	-	-	-	-	-	-	-	-
MSTRG.3531.1	NW_011952024.1	1118585	1119194	+	ncbi_105395000	1112740	1117333	+	DOWNSTREAM	1251	LOC105395000	SH3 domain-binding glutamic acid-rich protein homolog	-	-	-	-	-	-	-
MSTRG.3531.1	NW_011952024.1	1118585	1119194	+	ncbi_105395500	1128624	1134134	-	DOWNSTREAM	9429	LOC105395500	neurofilament heavy polypeptide-like	-	-	-	-	-	-	-
MSTRG.3534.1	NW_011952024.1	1125051	1125711	+	MSTRG.3532	1120969	1122725	+	DOWNSTREAM	2325	--	-	-	-	-	-	-	-	-
MSTRG.3534.1	NW_011952024.1	1125051	1125711	+	ncbi_105395000	1112740	1117333	+	DOWNSTREAM	7717	LOC105395000	SH3 domain-binding glutamic acid-rich protein homolog	-	-	-	-	-	-	-
MSTRG.3534.1	NW_011952024.1	1125051	1125711	+	ncbi_105395500	1128624	1134134	-	DOWNSTREAM	2912	LOC105395500	neurofilament heavy polypeptide-like	-	-	-	-	-	-	-
MSTRG.3537.2	NW_011952024.1	1128777	1129468	-	MSTRG.3532	1120969	1122725	+	DOWNSTREAM	6051	--	-	-	-	-	-	-	-	-
MSTRG.3579.1	NW_011952024.1	1571594	1638374	+	ncbi_105395608	1646109	1676094	+	UPSTREAM	7734	LOC105395608	uncharacterized LOC105395608	-	-	-	-	-	-	-
MSTRG.3584.2	NW_011952024.1	1677980	1679227	+	ncbi_105395608	1646109	1676094	+	DOWNSTREAM	1885	LOC105395608	uncharacterized LOC105395608	-	-	-	-	-	-	-
MSTRG.3584.2	NW_011952024.1	1677980	1679227	+	ncbi_105395183	1682648	1708634	-	DOWNSTREAM	3420	LOC105395183	protein bric-a-brac 2-like	-	-	-	-	-	-	-
MSTRG.3603.1	NW_011952024.1	1760800	1761671	-	ncbi_105395248	1762784	1777834	-	DOWNSTREAM	1112	LOC105395248	lachesin-like	-	-	-	-	-	-	-
MSTRG.3603.2	NW_011952024.1	1760954	1761671	-	ncbi_105395248	1762784	1777834	-	DOWNSTREAM	1112	LOC105395248	lachesin-like	-	-	-	-	-	-	-
MSTRG.3665.3	NW_011952025.1	393641	396096	-	ncbi_105395805	374406	383700	-	UPSTREAM	9940	LOC105395805	casein kinase I isoform delta-B-like	Environmental Information Processing;Environmental Information Processing;Environmental Information Processing;Environmental Information Processing;Organismal Systems	Signal transduction;Signal transduction;Signal transduction;Signal transduction;Environmental adaptation	ko04068//FoxO signaling pathway;ko04310//Wnt signaling pathway;ko04391//Hippo signaling pathway -fly;ko04340//Hedgehog signaling pathway;ko04711//Circadian rhythm - fly	K08960;K08960;K08960;K08960;K08960	-	GO:0004672//protein kinase activity;GO:0032550//purine ribonucleoside binding	GO:0006464//cellular protein modification process
XR_961130.1	NW_011952025.1	977890	984717	+	ncbi_105396517	934350	977684	+	DOWNSTREAM	205	LOC105396517	RNA polymerase II elongation factor Ell	-	-	-	-	-	-	-
MSTRG.3755.2	NW_011952025.1	1410273	1411515	+	ncbi_105396588	1411869	1424062	+	UPSTREAM	353	LOC105396588	intraflagellar transport protein 81 homolog	-	-	-	-	-	-	-
MSTRG.3755.2	NW_011952025.1	1410273	1411515	+	ncbi_105396571	1371921	1405011	+	DOWNSTREAM	5261	LOC105396571	trafficking kinesin-binding protein 1-like	-	-	-	-	-	-	-
MSTRG.3890.5	NW_011952026.1	491831	496152	+	ncbi_105396942	498691	500294	-	DOWNSTREAM	2538	LOC105396942	gamma-glutamylcyclotransferase-like	-	-	-	-	-	-	-
MSTRG.3890.5	NW_011952026.1	491831	496152	+	ncbi_105396933	500772	505991	-	DOWNSTREAM	4619	LOC105396933	glycosaminoglycan xylosylkinase	-	-	-	-	-	-	-
MSTRG.3937.1	NW_011952026.1	820083	822539	-	MSTRG.3938	823941	826051	+	UPSTREAM	1401	dacA	diadenylate cyclase-like [Rattus rattus]	-	-	-	-	-	-	-
MSTRG.3937.1	NW_011952026.1	820083	822539	-	ncbi_105397116	829895	897376	-	DOWNSTREAM	7355	LOC105397116	pleckstrin homology-like domain family B member 2	-	-	-	-	-	-	-
MSTRG.3940.2	NW_011952026.1	828170	829782	-	MSTRG.3938	823941	826051	+	DOWNSTREAM	2118	dacA	diadenylate cyclase-like [Rattus rattus]	-	-	-	-	-	-	-
MSTRG.3940.2	NW_011952026.1	828170	829782	-	ncbi_105397116	829895	897376	-	DOWNSTREAM	112	LOC105397116	pleckstrin homology-like domain family B member 2	-	-	-	-	-	-	-
MSTRG.3957.1	NW_011952026.1	1022999	1029352	+	ncbi_105397717	1036858	1057079	-	DOWNSTREAM	7505	LOC105397717	methionine--tRNA ligase	Genetic Information Processing;Metabolism	Translation;Metabolism of other amino acids	ko00970//Aminoacyl-tRNA biosynthesis;ko00450//Selenocompound metabolism	K01874;K01874	-	-	-
MSTRG.3996.1	NW_011952026.1	1398721	1489903	+	ncbi_105397284	1496642	1497375	-	DOWNSTREAM	6738	LOC105397284	uncharacterized LOC105397284	-	-	-	-	-	-	-
XR_961155.1	NW_011952026.1	1506776	1507065	+	ncbi_105397284	1496642	1497375	-	UPSTREAM	9400	LOC105397284	uncharacterized LOC105397284	-	-	-	-	-	-	-
MSTRG.4064.1	NW_011952027.1	104348	117374	+	ncbi_105397932	125384	127316	+	UPSTREAM	8009	LOC105397932	uncharacterized LOC105397932	-	-	-	-	-	-	-
MSTRG.4212.1	NW_011952028.1	226107	228292	+	ncbi_105397956	229673	238202	-	DOWNSTREAM	1380	LOC105397956	uncharacterized LOC105397956	-	-	-	-	-	-	-
MSTRG.4358.1	NW_011952029.1	61854	66039	-	ncbi_105398063	75772	77836	+	UPSTREAM	9732	LOC105398063	uncharacterized LOC105398063	-	-	-	-	-	-	-
MSTRG.4363.1	NW_011952029.1	82327	88674	+	ncbi_105398063	75772	77836	+	DOWNSTREAM	4490	LOC105398063	uncharacterized LOC105398063	-	-	-	-	-	-	-
MSTRG.4422.1	NW_011952029.1	952877	956993	-	ncbi_105398160	943199	946818	-	UPSTREAM	6058	LOC105398160	probable serine/threonine-protein kinase DDB_G0282963	-	-	-	-	-	-	-
MSTRG.4422.1	NW_011952029.1	952877	956993	-	ncbi_105398161	948579	951683	-	UPSTREAM	1193	LOC105398161	probable RNA-binding protein CG14230	-	-	-	-	-	-	-
MSTRG.4422.1	NW_011952029.1	952877	956993	-	ncbi_105398077	965758	967690	+	UPSTREAM	8764	LOC105398077	eukaryotic translation elongation factor 1 epsilon-1-like	-	-	-	-	-	-	-
XR_961186.1	NW_011952029.1	1026721	1029566	-	ncbi_105398087	1021492	1023390	+	DOWNSTREAM	3330	LOC105398087	uncharacterized LOC105398087	-	-	-	-	-	-	-
XR_961186.1	NW_011952029.1	1026721	1029566	-	ncbi_105398088	1023447	1024485	-	UPSTREAM	2235	LOC105398088	uncharacterized LOC105398088	-	-	-	-	-	-	-
XR_961186.1	NW_011952029.1	1026721	1029566	-	ncbi_105398091	1033247	1033823	+	UPSTREAM	3680	LOC105398091	ejaculatory bulb-specific protein 3-like	-	-	-	-	-	-	-
XR_961186.1	NW_011952029.1	1026721	1029566	-	ncbi_105398092	1037525	1038167	-	DOWNSTREAM	7958	LOC105398092	ejaculatory bulb-specific protein 3-like	-	-	-	-	-	-	-
MSTRG.4475.1	NW_011952029.1	1223625	1231016	+	ncbi_105398111	1231904	1235506	-	DOWNSTREAM	887	LOC105398111	uncharacterized LOC105398111	-	-	-	-	-	-	-
XR_961190.1	NW_011952029.1	1770056	1771882	-	ncbi_105398139	1773147	1775273	+	UPSTREAM	1264	LOC105398139	predicted GPI-anchored protein 37	-	-	-	-	-	-	-
MSTRG.4552.1	NW_011952029.1	1799725	1801549	-	ncbi_105398184	1808011	1815368	-	DOWNSTREAM	6461	LOC105398184	acetylcholine receptor subunit alpha-like	-	-	-	-	GO:0031224//intrinsic component of membrane;GO:0097060//synaptic membrane	GO:0015276//ligand-gated ion channel activity	GO:0006812//cation transport
MSTRG.4613.3	NW_011952030.1	573073	579428	+	ncbi_105398206	564121	570403	+	DOWNSTREAM	2669	LOC105398206	glutenin	-	-	-	-	-	-	-
MSTRG.4613.3	NW_011952030.1	573073	579428	+	ncbi_105398207	570608	572972	+	DOWNSTREAM	100	LOC105398207	protein takeout-like	-	-	-	-	-	-	-
MSTRG.4614.1	NW_011952030.1	577835	617532	+	ncbi_105398206	564121	570403	+	DOWNSTREAM	7431	LOC105398206	glutenin	-	-	-	-	-	-	-
MSTRG.4614.1	NW_011952030.1	577835	617532	+	ncbi_105398207	570608	572972	+	DOWNSTREAM	4862	LOC105398207	protein takeout-like	-	-	-	-	-	-	-
MSTRG.4630.1	NW_011952030.1	692886	694278	-	MSTRG.4627	686467	687439	-	UPSTREAM	5446	--	-	-	-	-	-	-	-	-
MSTRG.4634.1	NW_011952030.1	714938	715226	+	ncbi_105398216	721810	723333	+	UPSTREAM	6583	LOC105398216	dehydrodolichyl diphosphate syntase complex subunit nus1	Metabolism;Metabolism	Global and overview maps;Metabolism of terpenoids and polyketides	ko01110//Biosynthesis of secondary metabolites;ko00900//Terpenoid backbone biosynthesis	K19177;K19177	-	-	-
MSTRG.4634.1	NW_011952030.1	714938	715226	+	ncbi_105398214	693074	713481	+	DOWNSTREAM	1456	LOC105398214	monocarboxylate transporter 10-like	-	-	-	-	-	-	-
MSTRG.4707.1	NW_011952031.1	72408	74200	-	ncbi_105398258	81682	93802	+	UPSTREAM	7481	LOC105398258	tankyrase-like	-	-	-	-	-	-	-
MSTRG.4759.1	NW_011952031.1	627023	627820	+	ncbi_105398319	610425	626371	+	DOWNSTREAM	651	LOC105398319	uncharacterized LOC105398319	-	-	-	-	-	-	-
MSTRG.4759.1	NW_011952031.1	627023	627820	+	ncbi_105398320	636251	650885	-	DOWNSTREAM	8430	LOC105398320	chaoptin-like	-	-	-	-	-	-	-
MSTRG.4773.1	NW_011952031.1	820033	820763	+	ncbi_105398275	752823	816331	+	DOWNSTREAM	3701	LOC105398275	facilitated trehalose transporter Tret1-like	-	-	-	-	-	-	-
MSTRG.4785.1	NW_011952031.1	1012660	1013172	+	ncbi_105398285	1002852	1009507	+	DOWNSTREAM	3152	LOC105398285	tRNA pseudouridine synthase A	-	-	-	-	-	-	GO:0016070//RNA metabolic process
MSTRG.4785.1	NW_011952031.1	1012660	1013172	+	MSTRG.4786	1014045	1015839	+	UPSTREAM	872	--	Transposable element Tc3 transposase [Eumeta japonica]	-	-	-	-	-	-	-
MSTRG.4785.1	NW_011952031.1	1012660	1013172	+	MSTRG.4787	1017139	1048068	+	UPSTREAM	3966	--	Ribonuclease H-like domain [Cinara cedri]	-	-	-	-	-	-	-
MSTRG.4789.1	NW_011952031.1	1050351	1053307	+	MSTRG.4787	1017139	1048068	+	DOWNSTREAM	2282	--	Ribonuclease H-like domain [Cinara cedri]	-	-	-	-	-	-	-
MSTRG.4789.2	NW_011952031.1	1050391	1054388	+	MSTRG.4787	1017139	1048068	+	DOWNSTREAM	2322	--	Ribonuclease H-like domain [Cinara cedri]	-	-	-	-	-	-	-
MSTRG.4873.1	NW_011952032.1	191393	197040	+	ncbi_105398352	200741	212113	-	DOWNSTREAM	3700	LOC105398352	cytochrome P450 4C1-like	-	-	-	-	-	-	-
MSTRG.4919.1	NW_011952032.1	586207	587715	-	ncbi_105398359	592970	597211	+	UPSTREAM	5254	LOC105398359	facilitated trehalose transporter Tret1-like	-	-	-	-	-	-	-
MSTRG.4918.1	NW_011952032.1	586207	587965	+	ncbi_105398359	592970	597211	+	UPSTREAM	5004	LOC105398359	facilitated trehalose transporter Tret1-like	-	-	-	-	-	-	-
MSTRG.4934.1	NW_011952032.1	782666	787033	-	ncbi_105398365	699928	781639	-	UPSTREAM	1026	LOC105398365	actin-binding LIM protein 3	-	-	-	-	-	-	GO:0006996//organelle organization
MSTRG.4934.1	NW_011952032.1	782666	787033	-	ncbi_105398404	787399	807130	-	DOWNSTREAM	365	LOC105398404	ubiquitin thioesterase trabid-like	-	-	-	-	-	-	-
XR_961208.1	NW_011952032.1	1118206	1122644	-	ncbi_105398370	1106473	1110390	-	UPSTREAM	7815	LOC105398370	uncharacterized LOC105398370	-	-	-	-	-	-	-
XR_961207.1	NW_011952032.1	1118206	1133078	-	ncbi_105398370	1106473	1110390	-	UPSTREAM	7815	LOC105398370	uncharacterized LOC105398370	-	-	-	-	-	-	-
XR_961209.1	NW_011952032.1	1118206	1133078	-	ncbi_105398370	1106473	1110390	-	UPSTREAM	7815	LOC105398370	uncharacterized LOC105398370	-	-	-	-	-	-	-
MSTRG.5031.1	NW_011952032.1	1714245	1714873	-	ncbi_105398412	1703789	1709058	-	UPSTREAM	5186	LOC105398412	uncharacterized LOC105398412	-	-	-	-	-	-	-
MSTRG.5059.1	NW_011952033.1	164937	170199	-	ncbi_105398508	170202	178448	+	UPSTREAM	2	LOC105398508	uncharacterized LOC105398508	-	-	-	-	-	-	-
MSTRG.5101.2	NW_011952033.1	507953	508540	-	ncbi_105398438	500312	503696	-	UPSTREAM	4256	LOC105398438	catalase-like	Metabolism;Metabolism;Metabolism;Cellular Processes;Environmental Information Processing;Organismal Systems;Metabolism;Metabolism	Global and overview maps;Global and overview maps;Global and overview maps;Transport and catabolism;Signal transduction;Aging;Carbohydrate metabolism;Amino acid metabolism	ko01110//Biosynthesis of secondary metabolites;ko01130//Biosynthesis of antibiotics;ko01200//Carbon metabolism;ko04146//Peroxisome;ko04068//FoxO signaling pathway;ko04213//Longevity regulating pathway - multiple species;ko00630//Glyoxylate and dicarboxylate metabolism;ko00380//Tryptophan metabolism	K03781;K03781;K03781;K03781;K03781;K03781;K03781;K03781	-	GO:0003824//catalytic activity;GO:0016209//antioxidant activity;GO:0043169//cation binding;GO:0046906//tetrapyrrole binding	GO:0006950//response to stress;GO:0042743//hydrogen peroxide metabolic process;GO:0044710//single-organism metabolic process
MSTRG.5102.2	NW_011952033.1	508817	509510	+	ncbi_105398438	500312	503696	-	UPSTREAM	5120	LOC105398438	catalase-like	Metabolism;Metabolism;Metabolism;Cellular Processes;Environmental Information Processing;Organismal Systems;Metabolism;Metabolism	Global and overview maps;Global and overview maps;Global and overview maps;Transport and catabolism;Signal transduction;Aging;Carbohydrate metabolism;Amino acid metabolism	ko01110//Biosynthesis of secondary metabolites;ko01130//Biosynthesis of antibiotics;ko01200//Carbon metabolism;ko04146//Peroxisome;ko04068//FoxO signaling pathway;ko04213//Longevity regulating pathway - multiple species;ko00630//Glyoxylate and dicarboxylate metabolism;ko00380//Tryptophan metabolism	K03781;K03781;K03781;K03781;K03781;K03781;K03781;K03781	-	GO:0003824//catalytic activity;GO:0016209//antioxidant activity;GO:0043169//cation binding;GO:0046906//tetrapyrrole binding	GO:0006950//response to stress;GO:0042743//hydrogen peroxide metabolic process;GO:0044710//single-organism metabolic process
MSTRG.5102.2	NW_011952033.1	508817	509510	+	ncbi_105398521	481567	508237	+	DOWNSTREAM	579	LOC105398521	protein pecanex-like	-	-	-	-	-	-	-
MSTRG.5224.1	NW_011952033.1	1405971	1407519	+	ncbi_105398485	1407594	1408582	-	DOWNSTREAM	74	LOC105398485	uncharacterized LOC105398485	-	-	-	-	-	-	-
MSTRG.5224.1	NW_011952033.1	1405971	1407519	+	ncbi_105398539	1410816	1418007	+	UPSTREAM	3296	LOC105398539	transmembrane and TPR repeat-containing protein 4-like	-	-	-	-	-	-	-
MSTRG.5230.1	NW_011952033.1	1422501	1423189	+	ncbi_105398539	1410816	1418007	+	DOWNSTREAM	4493	LOC105398539	transmembrane and TPR repeat-containing protein 4-like	-	-	-	-	-	-	-
MSTRG.5230.1	NW_011952033.1	1422501	1423189	+	ncbi_105398489	1424214	1428617	-	DOWNSTREAM	1024	LOC105398489	uncharacterized LOC105398489	-	-	-	-	-	-	-
MSTRG.5356.1	NW_011952034.1	951693	952953	-	ncbi_105398569	960936	983813	+	UPSTREAM	7982	LOC105398569	roquin-1	-	-	-	-	-	-	-
MSTRG.5414.2	NW_011952034.1	1613938	1616571	+	ncbi_105398588	1582456	1613762	+	DOWNSTREAM	175	LOC105398588	uncharacterized LOC105398588	-	-	-	-	-	-	-
MSTRG.5414.1	NW_011952034.1	1613938	1616774	+	ncbi_105398588	1582456	1613762	+	DOWNSTREAM	175	LOC105398588	uncharacterized LOC105398588	-	-	-	-	-	-	-
MSTRG.5453.1	NW_011952035.1	218787	220908	-	MSTRG.5456	230419	232653	+	UPSTREAM	9510	Smg7	PREDICTED: protein SMG7-like, partial [Plutella xylostella]	Genetic Information Processing	Translation	ko03015//mRNA surveillance pathway	K14409	GO:0005856//cytoskeleton;GO:0043231//intracellular membrane-bounded organelle;GO:0044444//cytoplasmic part	GO:0019903//protein phosphatase binding	GO:0000956//nuclear-transcribed mRNA catabolic process;GO:0006405//RNA export from nucleus;GO:0019220//regulation of phosphate metabolic process
MSTRG.5575.1	NW_011952035.1	1159900	1165425	-	ncbi_105398692	1123588	1156357	+	DOWNSTREAM	3542	LOC105398692	sortilin-related receptor-like	-	-	-	-	-	-	-
MSTRG.5716.1	NW_011952036.1	996065	996378	+	ncbi_105398784	989034	990594	-	UPSTREAM	5470	LOC105398784	uncharacterized LOC105398784	-	-	-	-	-	-	-
XR_961232.1	NW_011952036.1	1529783	1530757	+	ncbi_105398795	1526580	1527210	+	DOWNSTREAM	2572	LOC105398795	outer dense fiber protein 3-like protein 2	-	-	-	-	-	-	-
XR_961232.1	NW_011952036.1	1529783	1530757	+	ncbi_105398752	1531115	1536460	+	UPSTREAM	357	LOC105398752	outer dense fiber protein 3-like protein 2	-	-	-	-	-	-	-
MSTRG.5790.1	NW_011952036.1	1654427	1654804	-	ncbi_105398758	1642975	1645800	+	DOWNSTREAM	8626	LOC105398758	eukaryotic translation initiation factor 3 subunit G	Genetic Information Processing	Translation	ko03013//RNA transport	K03248	GO:0043234//protein complex;GO:0070993//translation preinitiation complex	GO:0008135//translation factor activity, RNA binding	GO:0006417//regulation of translation;GO:0022618//ribonucleoprotein complex assembly
MSTRG.5868.1	NW_011952037.1	661331	663736	+	ncbi_105379988	635136	658627	+	DOWNSTREAM	2703	LOC105379988	methionine--tRNA ligase	Genetic Information Processing;Metabolism	Translation;Metabolism of other amino acids	ko00970//Aminoacyl-tRNA biosynthesis;ko00450//Selenocompound metabolism	K01874;K01874	-	-	-
MSTRG.6051.2	NW_011952038.1	611967	615739	+	MSTRG.6053	615821	619080	-	DOWNSTREAM	81	RTase	PREDICTED: RNA-directed DNA polymerase from mobile element jockey-like isoform X1 [Amyelois transitella]	-	-	-	-	-	-	-
XR_960420.1	NW_011952038.1	1203560	1211293	-	ncbi_105380101	1214038	1257455	+	UPSTREAM	2744	LOC105380101	PR domain zinc finger protein 16-like	-	-	-	-	-	-	-
MSTRG.6116.4	NW_011952038.1	1204088	1210352	-	ncbi_105380101	1214038	1257455	+	UPSTREAM	3685	LOC105380101	PR domain zinc finger protein 16-like	-	-	-	-	-	-	-
MSTRG.6165.1	NW_011952039.1	175888	177370	+	ncbi_105380145	185344	212680	-	DOWNSTREAM	7973	LOC105380145	vascular endothelial growth factor receptor 1-like	Cellular Processes	Transport and catabolism	ko04144//Endocytosis	K05096	-	-	-
MSTRG.6176.1	NW_011952039.1	308507	348570	-	ncbi_105380108	348845	356845	-	DOWNSTREAM	274	LOC105380108	V-type proton ATPase subunit H	Metabolism;Metabolism;Cellular Processes;Cellular Processes	Global and overview maps;Energy metabolism;Transport and catabolism;Transport and catabolism	ko01100//Metabolic pathways;ko00190//Oxidative phosphorylation;ko04142//Lysosome;ko04145//Phagosome	K02144;K02144;K02144;K02144	-	GO:0015078//hydrogen ion transmembrane transporter activity;GO:0022857//transmembrane transporter activity	GO:0015988//energy coupled proton transmembrane transport, against electrochemical gradient
MSTRG.6206.1	NW_011952039.1	639493	653158	+	ncbi_105380121	653538	655701	-	DOWNSTREAM	379	LOC105380121	uncharacterized LOC105380121	-	-	-	-	-	-	-
MSTRG.6363.1	NW_011952040.1	526518	529652	-	ncbi_105380261	529819	537653	+	UPSTREAM	166	LOC105380261	uncharacterized LOC105380261	-	-	-	-	-	-	-
MSTRG.6437.1	NW_011952040.1	1115864	1117699	+	ncbi_105380222	1099579	1107193	+	DOWNSTREAM	8670	LOC105380222	uncharacterized LOC105380222	-	-	-	-	-	-	-
MSTRG.6437.1	NW_011952040.1	1115864	1117699	+	ncbi_105380225	1118559	1126603	-	DOWNSTREAM	859	LOC105380225	protein penguin	-	-	-	-	-	-	-
MSTRG.6468.1	NW_011952040.1	1389430	1430657	-	ncbi_105380283	1379853	1381487	-	UPSTREAM	7942	LOC105380283	uncharacterized LOC105380283	-	-	-	-	-	-	-
MSTRG.6522.3	NW_011952041.1	321394	322927	-	ncbi_105380302	324874	330409	+	UPSTREAM	1946	LOC105380302	cysteine-rich venom protein TEL1-like	-	-	-	-	-	-	-
MSTRG.6532.1	NW_011952041.1	399846	405798	-	ncbi_105380303	384384	390628	+	DOWNSTREAM	9217	LOC105380303	uncharacterized LOC105380303	Metabolism;Metabolism;Metabolism;Metabolism;Metabolism;Metabolism	Global and overview maps;Global and overview maps;Amino acid metabolism;Amino acid metabolism;Amino acid metabolism;Amino acid metabolism	ko01100//Metabolic pathways;ko01110//Biosynthesis of secondary metabolites;ko00380//Tryptophan metabolism;ko00350//Tyrosine metabolism;ko00340//Histidine metabolism;ko00360//Phenylalanine metabolism	K01593;K01593;K01593;K01593;K01593;K01593	-	-	-
MSTRG.6532.1	NW_011952041.1	399846	405798	-	ncbi_105380306	408944	410301	-	DOWNSTREAM	3145	LOC105380306	uncharacterized LOC105380306	-	-	-	-	-	-	-
MSTRG.6535.1	NW_011952041.1	410548	413240	+	ncbi_105380305	399011	408621	+	DOWNSTREAM	1926	LOC105380305	aromatic-L-amino-acid decarboxylase-like	Metabolism;Metabolism;Metabolism;Metabolism;Metabolism;Metabolism	Global and overview maps;Global and overview maps;Amino acid metabolism;Amino acid metabolism;Amino acid metabolism;Amino acid metabolism	ko01100//Metabolic pathways;ko01110//Biosynthesis of secondary metabolites;ko00380//Tryptophan metabolism;ko00350//Tyrosine metabolism;ko00340//Histidine metabolism;ko00360//Phenylalanine metabolism	K01593;K01593;K01593;K01593;K01593;K01593	-	-	-
MSTRG.6535.1	NW_011952041.1	410548	413240	+	ncbi_105380306	408944	410301	-	UPSTREAM	246	LOC105380306	uncharacterized LOC105380306	-	-	-	-	-	-	-
MSTRG.6539.1	NW_011952041.1	420874	421560	+	ncbi_105380313	423827	428350	+	UPSTREAM	2266	LOC105380313	geranylgeranyl transferase type-2 subunit alpha	-	-	-	-	-	-	-
MSTRG.6572.1	NW_011952041.1	788935	790630	+	ncbi_105380357	763607	784941	+	DOWNSTREAM	3993	LOC105380357	histone-lysine N-methyltransferase 2C-like	Metabolism	Amino acid metabolism	ko00310//Lysine degradation	K09188	-	-	-
MSTRG.6572.1	NW_011952041.1	788935	790630	+	ncbi_105380323	796790	807883	-	DOWNSTREAM	6159	LOC105380323	plexin domain-containing protein 2-like	-	-	-	-	-	-	-
MSTRG.6625.1	NW_011952041.1	1300426	1302794	-	ncbi_105380334	1302995	1351081	-	DOWNSTREAM	200	LOC105380334	G-protein coupled receptor Mth2-like	-	-	-	-	-	-	-
MSTRG.6641.1	NW_011952041.1	1485766	1486419	-	ncbi_105380340	1491091	1498400	-	DOWNSTREAM	4671	LOC105380340	protein AATF	-	-	-	-	-	-	-
MSTRG.6788.1	NW_011952042.1	1275829	1276343	+	ncbi_105380457	1268102	1270680	-	UPSTREAM	5148	LOC105380457	probable RNA-binding protein 46	-	-	-	-	-	-	-
MSTRG.6788.1	NW_011952042.1	1275829	1276343	+	ncbi_105380409	1259750	1266247	-	UPSTREAM	9581	LOC105380409	uncharacterized LOC105380409	-	-	-	-	-	-	-
MSTRG.6823.1	NW_011952042.1	1588173	1589030	+	ncbi_105380459	1580585	1583118	+	DOWNSTREAM	5054	LOC105380459	uncharacterized LOC105380459	-	-	-	-	-	-	-
MSTRG.6823.1	NW_011952042.1	1588173	1589030	+	ncbi_105380460	1595144	1605425	-	DOWNSTREAM	6113	LOC105380460	uncharacterized LOC105380460	-	-	-	-	-	-	-
MSTRG.6843.1	NW_011952043.1	153881	155117	-	ncbi_105380519	164679	173933	-	DOWNSTREAM	9561	LOC105380519	Meckel syndrome type 1 protein-like	-	-	-	-	-	-	-
MSTRG.6924.3	NW_011952043.1	862826	865401	+	ncbi_105380538	848004	862370	+	DOWNSTREAM	455	LOC105380538	uncharacterized LOC105380538	-	-	-	-	-	-	-
MSTRG.6924.3	NW_011952043.1	862826	865401	+	ncbi_105380489	867985	874159	+	UPSTREAM	2583	LOC105380489	uncharacterized LOC105380489	-	-	-	-	-	-	-
XR_960435.1	NW_011952043.1	1371908	1372779	-	ncbi_105380503	1370272	1371706	+	DOWNSTREAM	201	LOC105380503	NADH dehydrogenase [ubiquinone] iron-sulfur protein 8	Metabolism;Metabolism	Global and overview maps;Energy metabolism	ko01100//Metabolic pathways;ko00190//Oxidative phosphorylation	K03941;K03941	-	GO:0016491//oxidoreductase activity;GO:0051536//iron-sulfur cluster binding	GO:0044710//single-organism metabolic process
MSTRG.7030.3	NW_011952044.1	97950	99578	-	ncbi_105380549	80364	92785	-	UPSTREAM	5164	LOC105380549	zinc metalloproteinase nas-13-like	-	-	-	-	-	GO:0016787//hydrolase activity	-
MSTRG.7208.2	NW_011952045.1	688944	691198	+	ncbi_105380633	693291	720133	-	DOWNSTREAM	2092	LOC105380633	heat shock 70 kDa protein cognate 5	Genetic Information Processing	Folding, sorting and degradation	ko03018//RNA degradation	K04043	-	-	-
MSTRG.7250.1	NW_011952045.1	1094620	1095169	-	ncbi_105380640	978009	1087866	+	DOWNSTREAM	6753	LOC105380640	anoctamin-6-like	-	-	-	-	-	-	-
XR_960448.1	NW_011952046.1	1224105	1225504	-	ncbi_105380730	1211445	1216120	+	DOWNSTREAM	7984	LOC105380730	N-acetylneuraminate lyase-like	Metabolism	Carbohydrate metabolism	ko00520//Amino sugar and nucleotide sugar metabolism	K01639	-	-	-
MSTRG.7411.2	NW_011952046.1	1260282	1261547	+	ncbi_105380734	1268470	1297767	-	DOWNSTREAM	6922	LOC105380734	GTP-binding protein 2	-	-	-	-	-	-	-
MSTRG.7517.3	NW_011952047.1	879079	884093	+	MSTRG.7516	870321	872765	-	UPSTREAM	6313	--	-	-	-	-	-	-	-	-
MSTRG.7517.3	NW_011952047.1	879079	884093	+	ncbi_105380797	886040	897074	-	DOWNSTREAM	1946	LOC105380797	dolichyl-diphosphooligosaccharide--protein glycosyltransferase subunit STT3B	Metabolism;Genetic Information Processing;Metabolism	Global and overview maps;Folding, sorting and degradation;Glycan biosynthesis and metabolism	ko01100//Metabolic pathways;ko04141//Protein processing in endoplasmic reticulum;ko00510//N-Glycan biosynthesis	K07151;K07151;K07151	-	-	-
MSTRG.7603.1	NW_011952048.1	434527	434997	-	ncbi_105380892	438685	450025	-	DOWNSTREAM	3687	LOC105380892	uncharacterized LOC105380892	-	-	-	-	-	-	-
MSTRG.7665.1	NW_011952048.1	1078614	1079818	+	ncbi_105380866	1073322	1078427	+	DOWNSTREAM	186	LOC105380866	uncharacterized LOC105380866	-	-	-	-	-	-	-
MSTRG.7683.1	NW_011952048.1	1288341	1289829	+	ncbi_105380873	1280951	1287780	+	DOWNSTREAM	560	LOC105380873	plasminogen-like	-	-	-	-	-	GO:0016787//hydrolase activity	-
MSTRG.7683.1	NW_011952048.1	1288341	1289829	+	ncbi_105380874	1290195	1306452	-	DOWNSTREAM	365	LOC105380874	putative uncharacterized protein DDB_G0282133	-	-	-	-	-	-	-
MSTRG.7824.1	NW_011952049.1	1243459	1246385	+	ncbi_105380955	1255349	1258434	-	DOWNSTREAM	8963	LOC105380955	histone deacetylase HDT1-like	-	-	-	-	-	-	-
MSTRG.7824.1	NW_011952049.1	1243459	1246385	+	ncbi_105380953	1178148	1242953	+	DOWNSTREAM	505	LOC105380953	calbindin-32	-	-	-	-	-	-	-
MSTRG.7855.4	NW_011952049.1	1461294	1469143	+	ncbi_105380990	1446122	1456547	+	DOWNSTREAM	4746	LOC105380990	succinate dehydrogenase [ubiquinone] flavoprotein subunit	Metabolism;Metabolism;Metabolism;Metabolism;Metabolism;Metabolism;Metabolism	Global and overview maps;Global and overview maps;Global and overview maps;Global and overview maps;Global and overview maps;Energy metabolism;Carbohydrate metabolism	ko01100//Metabolic pathways;ko01110//Biosynthesis of secondary metabolites;ko01130//Biosynthesis of antibiotics;ko01120//Microbial metabolism in diverse environments;ko01200//Carbon metabolism;ko00190//Oxidative phosphorylation;ko00020//Citrate cycle (TCA cycle)	K00234;K00234;K00234;K00234;K00234;K00234;K00234	-	GO:0000166//nucleotide binding;GO:0016491//oxidoreductase activity	GO:0006091//generation of precursor metabolites and energy;GO:0044710//single-organism metabolic process
MSTRG.7855.2	NW_011952049.1	1461294	1469148	+	ncbi_105380990	1446122	1456547	+	DOWNSTREAM	4746	LOC105380990	succinate dehydrogenase [ubiquinone] flavoprotein subunit	Metabolism;Metabolism;Metabolism;Metabolism;Metabolism;Metabolism;Metabolism	Global and overview maps;Global and overview maps;Global and overview maps;Global and overview maps;Global and overview maps;Energy metabolism;Carbohydrate metabolism	ko01100//Metabolic pathways;ko01110//Biosynthesis of secondary metabolites;ko01130//Biosynthesis of antibiotics;ko01120//Microbial metabolism in diverse environments;ko01200//Carbon metabolism;ko00190//Oxidative phosphorylation;ko00020//Citrate cycle (TCA cycle)	K00234;K00234;K00234;K00234;K00234;K00234;K00234	-	GO:0000166//nucleotide binding;GO:0016491//oxidoreductase activity	GO:0006091//generation of precursor metabolites and energy;GO:0044710//single-organism metabolic process
MSTRG.7855.3	NW_011952049.1	1461294	1469148	+	ncbi_105380990	1446122	1456547	+	DOWNSTREAM	4746	LOC105380990	succinate dehydrogenase [ubiquinone] flavoprotein subunit	Metabolism;Metabolism;Metabolism;Metabolism;Metabolism;Metabolism;Metabolism	Global and overview maps;Global and overview maps;Global and overview maps;Global and overview maps;Global and overview maps;Energy metabolism;Carbohydrate metabolism	ko01100//Metabolic pathways;ko01110//Biosynthesis of secondary metabolites;ko01130//Biosynthesis of antibiotics;ko01120//Microbial metabolism in diverse environments;ko01200//Carbon metabolism;ko00190//Oxidative phosphorylation;ko00020//Citrate cycle (TCA cycle)	K00234;K00234;K00234;K00234;K00234;K00234;K00234	-	GO:0000166//nucleotide binding;GO:0016491//oxidoreductase activity	GO:0006091//generation of precursor metabolites and energy;GO:0044710//single-organism metabolic process
MSTRG.7937.1	NW_011952050.1	439842	440788	+	ncbi_105381056	444947	449429	-	DOWNSTREAM	4158	LOC105381056	nuclear factor related to kappa-B-binding protein-like	-	-	-	-	-	-	-
MSTRG.7937.2	NW_011952050.1	439842	440788	+	ncbi_105381056	444947	449429	-	DOWNSTREAM	4158	LOC105381056	nuclear factor related to kappa-B-binding protein-like	-	-	-	-	-	-	-
XR_960471.1	NW_011952050.1	1296912	1298002	-	ncbi_105381034	1300705	1301679	-	DOWNSTREAM	2702	LOC105381034	uncharacterized LOC105381034	-	-	-	-	-	-	-
XR_960471.1	NW_011952050.1	1296912	1298002	-	ncbi_105381065	1256057	1290612	-	UPSTREAM	6299	LOC105381065	AP-3 complex subunit beta-2	Cellular Processes	Transport and catabolism	ko04142//Lysosome	K12397	-	-	-
MSTRG.8084.1	NW_011952051.1	355642	356746	-	ncbi_105381076	309024	352723	+	DOWNSTREAM	2918	LOC105381076	Ig-like and fibronectin type-III domain-containing protein T04A11.3	-	-	-	-	-	-	-
MSTRG.8172.1	NW_011952051.1	1032279	1034494	+	ncbi_105381096	1040487	1047202	+	UPSTREAM	5992	LOC105381096	pumilio homolog 2-like	-	-	-	-	-	-	-
MSTRG.8199.1	NW_011952051.1	1219782	1274172	+	ncbi_105381112	1200505	1212644	+	DOWNSTREAM	7137	LOC105381112	MFS-type transporter SLC18B1-like	-	-	-	-	-	-	-
MSTRG.8211.1	NW_011952051.1	1445749	1450316	-	ncbi_105381119	1458062	1467100	+	UPSTREAM	7745	LOC105381119	trichoplein keratin filament-binding protein	-	-	-	-	-	-	-
MSTRG.8276.1	NW_011952052.1	804799	805264	-	ncbi_105381194	814437	927184	-	DOWNSTREAM	9172	LOC105381194	protein pangolin	Environmental Information Processing	Signal transduction	ko04310//Wnt signaling pathway	K04491	-	-	-
MSTRG.8449.1	NW_011952053.1	871219	878476	-	ncbi_105381235	862312	864125	+	DOWNSTREAM	7093	LOC105381235	zinc finger protein 1 homolog	-	-	-	-	-	-	-
MSTRG.8449.1	NW_011952053.1	871219	878476	-	ncbi_105381237	869029	871047	+	DOWNSTREAM	171	LOC105381237	zinc finger protein 28-like	-	-	-	-	-	-	-
XR_960482.1	NW_011952053.1	1118901	1135480	+	ncbi_105381280	1138649	1215643	+	UPSTREAM	3168	LOC105381280	plasma membrane calcium-transporting ATPase 3	-	-	-	-	-	-	-
XR_960484.1	NW_011952054.1	443621	444706	+	ncbi_105381347	375346	443595	+	DOWNSTREAM	25	LOC105381347	alpha-mannosidase 2-like	Metabolism	Glycan biosynthesis and metabolism	ko00511//Other glycan degradation	K01191	-	-	-
MSTRG.8608.1	NW_011952054.1	1152648	1154024	-	ncbi_105381324	1162372	1164869	-	DOWNSTREAM	8347	LOC105381324	UPF0193 protein EVG1 homolog	-	-	-	-	-	-	-
MSTRG.8654.1	NW_011952055.1	288827	289826	-	ncbi_105381367	281406	287593	+	DOWNSTREAM	1233	LOC105381367	metallophosphoesterase 1-like	-	-	-	-	-	-	-
MSTRG.8654.1	NW_011952055.1	288827	289826	-	ncbi_105381398	287667	288749	-	UPSTREAM	77	LOC105381398	cytochrome b5 isoform B	-	-	-	-	-	-	-
MSTRG.8654.1	NW_011952055.1	288827	289826	-	ncbi_105381399	297317	359168	-	DOWNSTREAM	7490	LOC105381399	whirlin	-	-	-	-	-	-	-
MSTRG.8677.1	NW_011952055.1	488110	492055	+	ncbi_105381378	469763	487574	+	DOWNSTREAM	535	LOC105381378	uncharacterized LOC105381378	-	-	-	-	-	-	-
MSTRG.8775.1	NW_011952056.1	194487	196071	+	ncbi_105381416	203864	205398	+	UPSTREAM	7792	LOC105381416	protein FAM177A1-like	-	-	-	-	-	-	-
MSTRG.8778.2	NW_011952056.1	208868	218778	+	ncbi_105381416	203864	205398	+	DOWNSTREAM	3469	LOC105381416	protein FAM177A1-like	-	-	-	-	-	-	-
MSTRG.8796.1	NW_011952056.1	405611	405937	-	ncbi_105381419	393406	404145	-	UPSTREAM	1465	LOC105381419	uncharacterized LOC105381419	-	-	-	-	-	-	-
MSTRG.8890.1	NW_011952056.1	1195710	1197004	-	ncbi_105381472	1177720	1194024	-	UPSTREAM	1685	LOC105381472	protein cappuccino-like	Organismal Systems	Development	ko04320//Dorso-ventral axis formation	K02184	-	-	-
MSTRG.8964.1	NW_011952057.1	940545	941839	+	ncbi_105381494	945469	953895	-	DOWNSTREAM	3629	LOC105381494	probable serine/threonine-protein kinase kinX	-	-	-	-	-	-	-
MSTRG.8996.1	NW_011952057.1	1293661	1296496	+	ncbi_105381502	1297824	1305304	-	DOWNSTREAM	1327	LOC105381502	uncharacterized LOC105381502	-	-	-	-	-	-	-
MSTRG.8996.1	NW_011952057.1	1293661	1296496	+	ncbi_105381501	1255889	1292889	+	DOWNSTREAM	771	LOC105381501	synaptotagmin-7	-	-	-	-	-	-	-
MSTRG.9175.1	NW_011952059.1	513940	515240	+	ncbi_105381588	497925	507781	-	UPSTREAM	6158	LOC105381588	PQ-loop repeat-containing protein 3-like	-	-	-	-	-	-	-
MSTRG.9178.2	NW_011952059.1	543124	545745	-	ncbi_105381625	546880	570513	+	UPSTREAM	1134	LOC105381625	uncharacterized LOC105381625	-	-	-	-	-	-	-
MSTRG.9194.1	NW_011952059.1	683587	685243	+	ncbi_105381595	673038	674881	+	DOWNSTREAM	8705	LOC105381595	insulin-like growth factor 2 mRNA-binding protein 2	-	-	-	-	-	-	-
MSTRG.9206.1	NW_011952059.1	743713	747925	-	ncbi_105381597	741918	743220	-	UPSTREAM	492	LOC105381597	properdin-like	-	-	-	-	-	-	-
MSTRG.9206.1	NW_011952059.1	743713	747925	-	ncbi_105381599	749684	763899	-	DOWNSTREAM	1758	LOC105381599	MAGUK p55 subfamily member 7	-	-	-	-	-	-	-
MSTRG.9249.7	NW_011952059.1	1287501	1329870	-	ncbi_105381613	1277320	1278306	+	DOWNSTREAM	9194	LOC105381613	cysteine dioxygenase type 1-like	Metabolism;Metabolism;Metabolism	Global and overview maps;Amino acid metabolism;Metabolism of other amino acids	ko01100//Metabolic pathways;ko00270//Cysteine and methionine metabolism;ko00430//Taurine and hypotaurine metabolism	K00456;K00456;K00456	-	GO:0051213//dioxygenase activity	GO:0044710//single-organism metabolic process
MSTRG.9249.6	NW_011952059.1	1287501	1329877	-	ncbi_105381613	1277320	1278306	+	DOWNSTREAM	9194	LOC105381613	cysteine dioxygenase type 1-like	Metabolism;Metabolism;Metabolism	Global and overview maps;Amino acid metabolism;Metabolism of other amino acids	ko01100//Metabolic pathways;ko00270//Cysteine and methionine metabolism;ko00430//Taurine and hypotaurine metabolism	K00456;K00456;K00456	-	GO:0051213//dioxygenase activity	GO:0044710//single-organism metabolic process
MSTRG.9418.1	NW_011952061.1	314943	315406	+	ncbi_105381721	289419	304976	-	UPSTREAM	9966	LOC105381721	multiple coagulation factor deficiency protein 2 homolog	-	-	-	-	-	-	-
MSTRG.9689.1	NW_011952063.1	283923	284511	-	ncbi_105381853	274508	280675	-	UPSTREAM	3247	LOC105381853	L-asparaginase-like	-	-	-	-	-	-	-
MSTRG.9698.1	NW_011952063.1	326819	341025	+	ncbi_105381858	323611	324755	-	UPSTREAM	2063	LOC105381858	SAYSvFN domain-containing protein 1	-	-	-	-	-	-	-
MSTRG.9722.1	NW_011952063.1	676770	683381	-	ncbi_105381862	585509	668796	-	UPSTREAM	7973	LOC105381862	bicaudal D-related protein homolog	-	-	-	-	-	-	-
MSTRG.9749.1	NW_011952063.1	996370	997088	+	ncbi_105381874	998906	1012666	+	UPSTREAM	1817	LOC105381874	uncharacterized LOC105381874	-	-	-	-	-	-	-
MSTRG.9750.1	NW_011952063.1	997457	998251	+	ncbi_105381874	998906	1012666	+	UPSTREAM	654	LOC105381874	uncharacterized LOC105381874	-	-	-	-	-	-	-
MSTRG.9752.1	NW_011952063.1	1100204	1100564	+	ncbi_105381875	1100695	1107378	-	DOWNSTREAM	130	LOC105381875	lanC-like protein 2	-	-	-	-	-	-	-
MSTRG.9845.1	NW_011952064.1	705577	706535	-	ncbi_105381966	696531	705302	-	UPSTREAM	274	LOC105381966	ethanolamine-phosphate phospho-lyase-like	Metabolism;Metabolism	Global and overview maps;Lipid metabolism	ko01100//Metabolic pathways;ko00564//Glycerophospholipid metabolism	K14286;K14286	-	-	-
MSTRG.9908.2	NW_011952065.1	377655	379997	+	ncbi_105381979	387000	400002	+	UPSTREAM	7002	LOC105381979	eukaryotic translation initiation factor 2 subunit 3-like	Metabolism	Amino acid metabolism	ko00310//Lysine degradation	K11419	-	GO:0008135//translation factor activity, RNA binding;GO:0017111//nucleoside-triphosphatase activity;GO:0032550//purine ribonucleoside binding	GO:0006412//translation
MSTRG.9950.1	NW_011952065.1	748268	763826	-	ncbi_105381995	739701	747513	-	UPSTREAM	754	LOC105381995	cGMP-dependent protein kinase	-	-	-	-	-	-	-
XR_960508.1	NW_011952065.1	764036	791264	-	ncbi_105381996	748268	763820	-	UPSTREAM	215	LOC105381996	RNA binding protein fox-1 homolog 2	-	-	-	-	-	-	-
MSTRG.10021.1	NW_011952066.1	228457	234188	-	ncbi_105382043	237165	254160	-	DOWNSTREAM	2976	LOC105382043	neuropeptide F	-	-	-	-	-	-	-
XR_960514.1	NW_011952066.1	822521	826204	+	ncbi_105382057	829964	836831	-	DOWNSTREAM	3759	LOC105382057	uncharacterized LOC105382057	-	-	-	-	-	-	-
MSTRG.10082.1	NW_011952066.1	838740	839575	-	ncbi_105382057	829964	836831	-	UPSTREAM	1908	LOC105382057	uncharacterized LOC105382057	-	-	-	-	-	-	-
XR_960516.1	NW_011952067.1	29322	32888	+	ncbi_105382137	41440	58523	+	UPSTREAM	8551	LOC105382137	glyoxylate reductase/hydroxypyruvate reductase-like	Metabolism;Metabolism;Metabolism;Metabolism;Metabolism;Metabolism	Global and overview maps;Global and overview maps;Global and overview maps;Amino acid metabolism;Carbohydrate metabolism;Carbohydrate metabolism	ko01100//Metabolic pathways;ko01110//Biosynthesis of secondary metabolites;ko01120//Microbial metabolism in diverse environments;ko00260//Glycine, serine and threonine metabolism;ko00620//Pyruvate metabolism;ko00630//Glyoxylate and dicarboxylate metabolism	K00049;K00049;K00049;K00049;K00049;K00049	-	-	-
XR_960519.1	NW_011952067.1	1063542	1065485	-	ncbi_105382135	1069549	1072414	-	DOWNSTREAM	4063	LOC105382135	uncharacterized LOC105382135	-	-	-	-	-	-	-
MSTRG.10381.5	NW_011952068.1	1227349	1228991	+	ncbi_105382183	1238515	1253920	+	UPSTREAM	9523	LOC105382183	transcriptional protein SWT1-like	-	-	-	-	-	-	-
MSTRG.10562.1	NW_011952070.1	664650	665936	+	ncbi_105382308	661238	663352	+	DOWNSTREAM	1297	LOC105382308	cytochrome b5-related protein-like	-	-	-	-	-	-	-
MSTRG.10567.2	NW_011952070.1	787038	789122	+	ncbi_105382310	793751	851645	-	DOWNSTREAM	4628	LOC105382310	uncharacterized LOC105382310	-	-	-	-	-	-	-
MSTRG.10576.1	NW_011952070.1	897223	900299	+	ncbi_105382292	895311	896728	+	DOWNSTREAM	494	LOC105382292	uncharacterized LOC105382292	-	-	-	-	-	-	-
MSTRG.10576.1	NW_011952070.1	897223	900299	+	ncbi_105382295	903822	906661	+	UPSTREAM	3522	LOC105382295	nucleoside diphosphate-linked moiety X motif 8	-	-	-	-	-	-	-
MSTRG.10662.1	NW_011952071.1	326475	328076	-	ncbi_105382322	321539	326116	-	UPSTREAM	358	LOC105382322	probable G-protein coupled receptor Mth-like 5	-	-	-	-	GO:0016020//membrane	-	GO:0044699//single-organism process;GO:0050896//response to stimulus
MSTRG.10662.1	NW_011952071.1	326475	328076	-	ncbi_105382324	311266	317921	-	UPSTREAM	8553	LOC105382324	zinc finger protein 234-like	-	-	-	-	-	-	-
MSTRG.10685.1	NW_011952071.1	529957	530987	+	ncbi_105382402	535962	544418	-	DOWNSTREAM	4974	LOC105382402	TNF receptor-associated factor 5-like	-	-	-	-	-	-	-
MSTRG.10687.2	NW_011952071.1	536038	537196	-	ncbi_105382403	547134	551683	-	DOWNSTREAM	9937	LOC105382403	leucine-rich repeat neuronal protein 3-like	-	-	-	-	-	-	-
MSTRG.10729.2	NW_011952071.1	905142	908514	-	ncbi_105382350	889482	897376	-	UPSTREAM	7765	LOC105382350	pre-mRNA-processing factor 39	-	-	-	-	-	-	-
MSTRG.10729.2	NW_011952071.1	905142	908514	-	ncbi_105382412	902457	904490	-	UPSTREAM	651	LOC105382412	putative uncharacterized protein DDB_G0282133	-	-	-	-	-	-	-
MSTRG.10729.2	NW_011952071.1	905142	908514	-	ncbi_105382352	910525	911425	+	UPSTREAM	2010	LOC105382352	uncharacterized LOC105382352	-	-	-	-	-	-	-
MSTRG.10729.1	NW_011952071.1	905142	908567	-	ncbi_105382350	889482	897376	-	UPSTREAM	7765	LOC105382350	pre-mRNA-processing factor 39	-	-	-	-	-	-	-
MSTRG.10729.1	NW_011952071.1	905142	908567	-	ncbi_105382412	902457	904490	-	UPSTREAM	651	LOC105382412	putative uncharacterized protein DDB_G0282133	-	-	-	-	-	-	-
MSTRG.10729.1	NW_011952071.1	905142	908567	-	ncbi_105382352	910525	911425	+	UPSTREAM	1957	LOC105382352	uncharacterized LOC105382352	-	-	-	-	-	-	-
MSTRG.10947.1	NW_011952073.1	85569	86408	-	MSTRG.10949	86501	87960	-	DOWNSTREAM	92	--	similar to CG13868 [Papilio xuthus]	-	-	-	-	-	-	-
MSTRG.10950.1	NW_011952073.1	89205	90390	-	MSTRG.10949	86501	87960	-	UPSTREAM	1244	--	similar to CG13868 [Papilio xuthus]	-	-	-	-	-	-	-
MSTRG.11072.1	NW_011952074.1	65417	73565	+	ncbi_105382565	52824	57140	+	DOWNSTREAM	8276	LOC105382565	tektin-3-like	-	-	-	-	-	-	-
MSTRG.11119.3	NW_011952074.1	552979	553937	+	ncbi_105382576	550953	552660	+	DOWNSTREAM	318	LOC105382576	uncharacterized LOC105382576	-	-	-	-	-	-	-
MSTRG.11119.4	NW_011952074.1	553008	554073	+	ncbi_105382576	550953	552660	+	DOWNSTREAM	347	LOC105382576	uncharacterized LOC105382576	-	-	-	-	-	-	-
MSTRG.11132.1	NW_011952074.1	631063	631815	-	ncbi_105382614	625471	626175	-	UPSTREAM	4887	LOC105382614	uncharacterized LOC105382614	-	-	-	-	-	-	-
MSTRG.11132.1	NW_011952074.1	631063	631815	-	ncbi_105382590	640744	641460	+	UPSTREAM	8928	LOC105382590	ATP synthase subunit g	Metabolism;Metabolism	Global and overview maps;Energy metabolism	ko01100//Metabolic pathways;ko00190//Oxidative phosphorylation	K02140;K02140	-	GO:0015077//monovalent inorganic cation transmembrane transporter activity	GO:0006754//ATP biosynthetic process
MSTRG.11132.1	NW_011952074.1	631063	631815	-	ncbi_105382589	634083	640609	-	DOWNSTREAM	2267	LOC105382589	dolichyl-diphosphooligosaccharide--protein glycosyltransferase subunit 2	Metabolism;Genetic Information Processing;Metabolism	Global and overview maps;Folding, sorting and degradation;Glycan biosynthesis and metabolism	ko01100//Metabolic pathways;ko04141//Protein processing in endoplasmic reticulum;ko00510//N-Glycan biosynthesis	K12667;K12667;K12667	-	-	-
MSTRG.11139.1	NW_011952074.1	647461	648910	+	ncbi_105382590	640744	641460	+	DOWNSTREAM	6000	LOC105382590	ATP synthase subunit g	Metabolism;Metabolism	Global and overview maps;Energy metabolism	ko01100//Metabolic pathways;ko00190//Oxidative phosphorylation	K02140;K02140	-	GO:0015077//monovalent inorganic cation transmembrane transporter activity	GO:0006754//ATP biosynthetic process
MSTRG.11139.1	NW_011952074.1	647461	648910	+	ncbi_105382589	634083	640609	-	UPSTREAM	6851	LOC105382589	dolichyl-diphosphooligosaccharide--protein glycosyltransferase subunit 2	Metabolism;Genetic Information Processing;Metabolism	Global and overview maps;Folding, sorting and degradation;Glycan biosynthesis and metabolism	ko01100//Metabolic pathways;ko04141//Protein processing in endoplasmic reticulum;ko00510//N-Glycan biosynthesis	K12667;K12667;K12667	-	-	-
MSTRG.11160.2	NW_011952074.1	813728	818660	+	ncbi_105382594	809588	813387	-	UPSTREAM	340	LOC105382594	UPF0160 protein C27H6.8	-	-	-	-	-	-	-
MSTRG.11176.1	NW_011952074.1	1030669	1036276	+	ncbi_105382595	1020354	1026411	+	DOWNSTREAM	4257	LOC105382595	zinc finger protein 12-like	-	-	-	-	-	-	-
MSTRG.11176.1	NW_011952074.1	1030669	1036276	+	ncbi_105382597	1038557	1067390	+	UPSTREAM	2280	LOC105382597	coiled-coil domain-containing protein R3HCC1L	-	-	-	-	-	-	-
MSTRG.11242.1	NW_011952075.1	710618	711384	-	ncbi_105382641	708515	709595	-	UPSTREAM	1022	LOC105382641	thioredoxin domain-containing protein 12-like	Metabolism	Metabolism of other amino acids	ko00480//Glutathione metabolism	K05360	-	-	-
MSTRG.11243.1	NW_011952075.1	713285	714088	-	ncbi_105382641	708515	709595	-	UPSTREAM	3689	LOC105382641	thioredoxin domain-containing protein 12-like	Metabolism	Metabolism of other amino acids	ko00480//Glutathione metabolism	K05360	-	-	-
MSTRG.11243.1	NW_011952075.1	713285	714088	-	ncbi_105382640	722322	723864	+	UPSTREAM	8233	LOC105382640	PIN2/TERF1-interacting telomerase inhibitor 1	-	-	-	-	-	-	-
MSTRG.11320.1	NW_011952076.1	399005	401642	-	ncbi_105382707	388952	397440	-	UPSTREAM	1564	LOC105382707	eukaryotic translation initiation factor 4 gamma 3-like	Genetic Information Processing	Translation	ko03013//RNA transport	K03260	-	-	-
MSTRG.11321.1	NW_011952076.1	408255	426676	-	ncbi_105382709	427215	437563	-	DOWNSTREAM	538	LOC105382709	uncharacterized LOC105382709	-	-	-	-	-	-	-
MSTRG.11333.1	NW_011952076.1	694177	695507	-	ncbi_105382683	697003	717195	-	DOWNSTREAM	1495	LOC105382683	ras-specific guanine nucleotide-releasing factor RalGPS1-like	-	-	-	-	-	-	-
MSTRG.11333.2	NW_011952076.1	695223	696457	-	ncbi_105382683	697003	717195	-	DOWNSTREAM	545	LOC105382683	ras-specific guanine nucleotide-releasing factor RalGPS1-like	-	-	-	-	-	-	-
MSTRG.11367.1	NW_011952076.1	1215869	1216759	+	MSTRG.11366	1211294	1212605	+	DOWNSTREAM	3263	--	-	-	-	-	-	-	-	-
MSTRG.11370.1	NW_011952076.1	1219963	1221131	+	MSTRG.11366	1211294	1212605	+	DOWNSTREAM	7357	--	-	-	-	-	-	-	-	-
MSTRG.11384.1	NW_011952077.1	205902	222709	+	ncbi_105382760	197732	200807	+	DOWNSTREAM	5094	LOC105382760	uncharacterized LOC105382760	-	-	-	-	-	-	-
MSTRG.11387.1	NW_011952077.1	219324	222824	-	ncbi_105382761	212271	216344	-	UPSTREAM	2979	LOC105382761	uncharacterized LOC105382761	-	-	-	-	-	-	-
MSTRG.11436.2	NW_011952077.1	862088	865616	-	ncbi_105382774	870183	878284	-	DOWNSTREAM	4566	LOC105382774	beta-1-syntrophin-like	-	-	-	-	-	GO:0016787//hydrolase activity	-
MSTRG.11456.1	NW_011952077.1	1133864	1134821	-	ncbi_105382746	1135096	1137041	-	DOWNSTREAM	274	LOC105382746	sericin 1-like	-	-	-	-	-	-	-
MSTRG.11554.1	NW_011952078.1	790937	793164	-	ncbi_105382854	754074	789983	+	DOWNSTREAM	953	LOC105382854	syntaxin-binding protein 5-like	-	-	-	-	-	-	-
MSTRG.11598.1	NW_011952078.1	1011977	1012542	+	ncbi_105382825	1002266	1003937	-	UPSTREAM	8039	LOC105382825	uncharacterized LOC105382825	-	-	-	-	-	-	-
MSTRG.11598.1	NW_011952078.1	1011977	1012542	+	ncbi_105382826	1020424	1026982	-	DOWNSTREAM	7881	LOC105382826	trimeric intracellular cation channel type B	-	-	-	-	GO:0031224//intrinsic component of membrane	-	GO:0006812//cation transport
MSTRG.11611.1	NW_011952078.1	1078631	1080035	+	ncbi_105382836	1089360	1111178	-	DOWNSTREAM	9324	LOC105382836	repetitive proline-rich cell wall protein 1	-	-	-	-	-	-	-
MSTRG.11624.1	NW_011952079.1	25060	25971	-	ncbi_105382866	11858	21660	+	DOWNSTREAM	3399	LOC105382866	V-type proton ATPase 116 kDa subunit a isoform 1-like	Metabolism;Metabolism;Cellular Processes;Cellular Processes	Global and overview maps;Energy metabolism;Transport and catabolism;Transport and catabolism	ko01100//Metabolic pathways;ko00190//Oxidative phosphorylation;ko04142//Lysosome;ko04145//Phagosome	K02154;K02154;K02154;K02154	-	-	-
MSTRG.11850.1	NW_011952081.1	225210	247890	-	MSTRG.11855	249023	253810	-	DOWNSTREAM	1132	--	polyprotein, partial [Operophtera brumata]	-	-	-	-	-	-	-
MSTRG.11850.2	NW_011952081.1	232292	233049	-	ncbi_105382989	235247	238242	+	UPSTREAM	2197	LOC105382989	uncharacterized LOC105382989	-	-	-	-	-	-	-
MSTRG.11860.1	NW_011952081.1	272011	276834	-	MSTRG.11858	260897	263908	-	UPSTREAM	8102	--	Gag-pol polyprotein [Operophtera brumata]	-	-	-	-	-	-	-
MSTRG.11911.2	NW_011952081.1	826093	826701	-	ncbi_105382974	824367	825667	-	UPSTREAM	425	LOC105382974	tetratricopeptide repeat protein 19 homolog	-	-	-	-	-	-	-
MSTRG.11911.2	NW_011952081.1	826093	826701	-	ncbi_105382976	832986	869902	-	DOWNSTREAM	6284	LOC105382976	semaphorin-1A	-	-	-	-	-	-	-
MSTRG.11911.3	NW_011952081.1	826093	826701	-	ncbi_105382974	824367	825667	-	UPSTREAM	425	LOC105382974	tetratricopeptide repeat protein 19 homolog	-	-	-	-	-	-	-
MSTRG.11911.3	NW_011952081.1	826093	826701	-	ncbi_105382976	832986	869902	-	DOWNSTREAM	6284	LOC105382976	semaphorin-1A	-	-	-	-	-	-	-
MSTRG.11931.1	NW_011952081.1	1046682	1056999	-	ncbi_105382982	1032804	1039641	+	DOWNSTREAM	7040	LOC105382982	nucleolar MIF4G domain-containing protein 1 homolog	-	-	-	-	-	-	-
MSTRG.11977.2	NW_011952082.1	427451	436245	+	ncbi_105383032	446170	498929	-	DOWNSTREAM	9924	LOC105383032	uncharacterized LOC105383032	-	-	-	-	-	-	-
MSTRG.12243.1	NW_011952084.1	737139	758222	-	MSTRG.12242	727261	733796	+	DOWNSTREAM	3342	--	fusion protein, partial [Operophtera brumata]	-	-	-	-	-	-	-
MSTRG.12281.1	NW_011952084.1	1108021	1109540	-	ncbi_105383138	1096393	1104611	+	DOWNSTREAM	3409	LOC105383138	TBC1 domain family member 16-like	-	-	-	-	-	-	-
MSTRG.12304.2	NW_011952085.1	230339	267394	-	ncbi_105383175	268533	270119	-	DOWNSTREAM	1138	LOC105383175	leucine-rich repeat-containing protein 34	-	-	-	-	-	-	-
MSTRG.12412.2	NW_011952086.1	133009	133677	+	ncbi_105383240	123048	125612	-	UPSTREAM	7396	LOC105383240	SET and MYND domain-containing protein 4-like	-	-	-	-	-	-	-
MSTRG.12412.2	NW_011952086.1	133009	133677	+	ncbi_105383283	134634	145227	-	DOWNSTREAM	956	LOC105383283	uncharacterized LOC105383283	Genetic Information Processing	Translation	ko03013//RNA transport	K14314	-	-	-
MSTRG.12497.1	NW_011952087.1	68771	114006	-	ncbi_105383330	117137	140199	+	UPSTREAM	3130	LOC105383330	angiotensin-converting enzyme-like	-	-	-	-	-	GO:0008238//exopeptidase activity;GO:0043169//cation binding	GO:0019538//protein metabolic process
MSTRG.12691.2	NW_011952089.1	170071	170368	+	ncbi_105383385	179508	241988	+	UPSTREAM	9139	LOC105383385	microtubule-associated protein Jupiter	-	-	-	-	-	-	-
MSTRG.12917.1	NW_011952091.1	851208	854098	-	ncbi_105383492	857671	860531	-	DOWNSTREAM	3572	LOC105383492	dopamine N-acetyltransferase-like	-	-	-	-	-	-	-
MSTRG.13025.1	NW_011952093.1	41063	43432	+	ncbi_105383557	3781	35056	-	UPSTREAM	6006	LOC105383557	sodium/hydrogen exchanger 10-like	-	-	-	-	-	-	-
MSTRG.13027.1	NW_011952093.1	46497	53612	-	MSTRG.13024	40616	46395	-	UPSTREAM	101	--	protein ANTAGONIST OF LIKE HETEROCHROMATIN PROTEIN 1-like [Trichoplusia ni]	-	-	-	-	-	-	-
MSTRG.13116.1	NW_011952094.1	90384	90813	-	ncbi_105383620	66320	80965	-	UPSTREAM	9418	LOC105383620	ATP-dependent RNA helicase SUV3 homolog	-	-	-	-	-	-	-
MSTRG.13116.1	NW_011952094.1	90384	90813	-	ncbi_105383622	99450	126124	-	DOWNSTREAM	8636	LOC105383622	glycerol-3-phosphate acyltransferase 4-like	Metabolism;Metabolism;Metabolism;Metabolism	Global and overview maps;Global and overview maps;Lipid metabolism;Lipid metabolism	ko01100//Metabolic pathways;ko01110//Biosynthesis of secondary metabolites;ko00564//Glycerophospholipid metabolism;ko00561//Glycerolipid metabolism	K13506;K13506;K13506;K13506	GO:0044464//cell part	-	-
MSTRG.13203.1	NW_011952094.1	937811	939072	+	MSTRG.13200	931073	932988	+	DOWNSTREAM	4822	--	-	-	-	-	-	-	-	-
MSTRG.13232.1	NW_011952095.1	74248	77569	+	ncbi_105383640	48975	68623	+	DOWNSTREAM	5624	LOC105383640	putative inorganic phosphate cotransporter	-	-	-	-	-	-	-
MSTRG.13232.1	NW_011952095.1	74248	77569	+	ncbi_105383643	77683	88460	+	UPSTREAM	113	LOC105383643	putative inorganic phosphate cotransporter	-	-	-	-	-	-	-
MSTRG.13271.1	NW_011952095.1	542032	592544	-	ncbi_105383676	526491	532429	-	UPSTREAM	9602	LOC105383676	uncharacterized LOC105383676	-	-	-	-	-	-	-
MSTRG.13302.1	NW_011952095.1	875123	877383	+	MSTRG.13300	872170	874835	+	DOWNSTREAM	287	pol	Retrovirus-related Pol polyprotein from transposon 297 [Eumeta japonica]	-	-	-	-	-	-	-
MSTRG.13302.1	NW_011952095.1	875123	877383	+	ncbi_105383683	878182	925585	-	DOWNSTREAM	798	LOC105383683	glypican-4	Environmental Information Processing	Signal transduction	ko04310//Wnt signaling pathway	K08110	-	-	-
MSTRG.13433.1	NW_011952097.1	400704	401366	-	ncbi_105383743	407733	418084	-	DOWNSTREAM	6366	LOC105383743	phosphoserine phosphatase-like	Metabolism;Metabolism;Metabolism;Metabolism;Metabolism;Metabolism	Global and overview maps;Global and overview maps;Global and overview maps;Global and overview maps;Global and overview maps;Amino acid metabolism	ko01100//Metabolic pathways;ko01130//Biosynthesis of antibiotics;ko01120//Microbial metabolism in diverse environments;ko01200//Carbon metabolism;ko01230//Biosynthesis of amino acids;ko00260//Glycine, serine and threonine metabolism	K01079;K01079;K01079;K01079;K01079;K01079	-	-	-
MSTRG.13482.16	NW_011952097.1	851334	887551	+	ncbi_105383760	843989	850583	+	DOWNSTREAM	750	LOC105383760	acetyl-CoA carboxylase-like	Metabolism;Metabolism;Metabolism;Metabolism;Metabolism;Metabolism	Global and overview maps;Global and overview maps;Global and overview maps;Carbohydrate metabolism;Carbohydrate metabolism;Lipid metabolism	ko01100//Metabolic pathways;ko01110//Biosynthesis of secondary metabolites;ko01212//Fatty acid metabolism;ko00620//Pyruvate metabolism;ko00640//Propanoate metabolism;ko00061//Fatty acid biosynthesis	K11262;K11262;K11262;K11262;K11262;K11262	-	-	-
MSTRG.13482.18	NW_011952097.1	881000	883457	+	ncbi_105383775	822070	880145	+	DOWNSTREAM	854	LOC105383775	acetyl-CoA carboxylase-like	Metabolism;Metabolism;Metabolism;Metabolism;Metabolism;Metabolism	Global and overview maps;Global and overview maps;Global and overview maps;Carbohydrate metabolism;Carbohydrate metabolism;Lipid metabolism	ko01100//Metabolic pathways;ko01110//Biosynthesis of secondary metabolites;ko01212//Fatty acid metabolism;ko00620//Pyruvate metabolism;ko00640//Propanoate metabolism;ko00061//Fatty acid biosynthesis	K11262;K11262;K11262;K11262;K11262;K11262	-	-	-
MSTRG.13526.1	NW_011952098.1	393975	394567	+	ncbi_105383791	390353	393235	-	UPSTREAM	739	LOC105383791	mitochondrial pyruvate carrier 1-like	-	-	-	-	-	-	GO:0006839//mitochondrial transport
MSTRG.13570.1	NW_011952098.1	690203	691493	+	ncbi_105383819	679374	685185	+	DOWNSTREAM	5017	LOC105383819	uncharacterized LOC105383819	-	-	-	-	-	-	-
XR_960600.1	NW_011952099.1	572940	576071	+	ncbi_105383853	580701	584654	-	DOWNSTREAM	4629	LOC105383853	leukocyte receptor cluster member 8 homolog	-	-	-	-	-	GO:0003824//catalytic activity	GO:0008152//metabolic process
MSTRG.13904.1	NW_011952102.1	297158	298266	+	ncbi_105384007	299611	301961	+	UPSTREAM	1344	LOC105384007	uncharacterized LOC105384007	Metabolism;Metabolism	Global and overview maps;Energy metabolism	ko01100//Metabolic pathways;ko00190//Oxidative phosphorylation	K00416;K00416	GO:0016020//membrane	-	GO:0044763//single-organism cellular process;GO:0055114//oxidation-reduction process
MSTRG.14006.1	NW_011952103.1	190777	194979	+	ncbi_105384072	201241	204852	+	UPSTREAM	6261	LOC105384072	zinc finger protein Gfi-1b-like	-	-	-	-	-	GO:0046914//transition metal ion binding	-
XR_960612.1	NW_011952104.1	402389	404595	+	ncbi_105384117	414392	416313	-	DOWNSTREAM	9796	LOC105384117	histone H1B-like	-	-	-	-	-	-	-
MSTRG.14345.1	NW_011952107.1	3222	10637	+	ncbi_105384272	14181	28692	+	UPSTREAM	3543	LOC105384272	cAMP and cAMP-inhibited cGMP 3'	Metabolism	Nucleotide metabolism	ko00230//Purine metabolism	K18438	-	-	-
MSTRG.14356.1	NW_011952107.1	53955	88524	-	ncbi_105384279	90985	116582	-	DOWNSTREAM	2460	LOC105384279	integrator complex subunit 7-like	-	-	-	-	-	-	-
MSTRG.14405.1	NW_011952107.1	778375	779367	-	ncbi_105384293	779984	795600	-	DOWNSTREAM	616	LOC105384293	polypeptide N-acetylgalactosaminyltransferase 1-like	Metabolism;Metabolism	Global and overview maps;Glycan biosynthesis and metabolism	ko01100//Metabolic pathways;ko00512//Mucin type O-glycan biosynthesis	K00710;K00710	-	-	-
MSTRG.14414.1	NW_011952107.1	820025	888757	+	ncbi_105384268	892009	897450	-	DOWNSTREAM	3251	LOC105384268	polypeptide N-acetylgalactosaminyltransferase 1-like	Metabolism;Metabolism	Global and overview maps;Glycan biosynthesis and metabolism	ko01100//Metabolic pathways;ko00512//Mucin type O-glycan biosynthesis	K00710;K00710	-	-	-
XR_960617.1	NW_011952108.1	341549	357631	-	ncbi_105384308	331588	341476	-	UPSTREAM	72	LOC105384308	protein halfway	-	-	-	-	-	-	-
MSTRG.14574.2	NW_011952109.1	508808	511424	+	ncbi_105384363	498523	500454	+	DOWNSTREAM	8353	LOC105384363	serine/threonine-protein kinase Nek8-like	-	-	-	-	-	-	-
MSTRG.14574.2	NW_011952109.1	508808	511424	+	ncbi_105384365	505429	508363	+	DOWNSTREAM	444	LOC105384365	uncharacterized protein YJR142W-like	-	-	-	-	-	-	-
MSTRG.14697.2	NW_011952110.1	655605	656378	+	ncbi_105384414	639090	654431	+	DOWNSTREAM	1173	LOC105384414	merlin	Environmental Information Processing	Signal transduction	ko04391//Hippo signaling pathway -fly	K16684	GO:0043232//intracellular non-membrane-bounded organelle;GO:0044425//membrane part	GO:0005515//protein binding	GO:0008283//cell proliferation
MSTRG.14697.2	NW_011952110.1	655605	656378	+	ncbi_105384432	662511	690278	+	UPSTREAM	6132	LOC105384432	carboxypeptidase D-like	-	-	-	-	-	-	-
MSTRG.14758.1	NW_011952111.1	212475	216071	+	ncbi_105384477	198691	211414	-	UPSTREAM	1060	LOC105384477	uncharacterized LOC105384477	-	-	-	-	-	-	-
MSTRG.14758.1	NW_011952111.1	212475	216071	+	ncbi_105384451	225810	226605	+	UPSTREAM	9738	LOC105384451	NADH dehydrogenase [ubiquinone] 1 alpha subcomplex subunit 7-like	Metabolism;Metabolism	Global and overview maps;Energy metabolism	ko01100//Metabolic pathways;ko00190//Oxidative phosphorylation	K03951;K03951	-	-	-
MSTRG.14796.1	NW_011952111.1	487922	501684	-	ncbi_105384459	502192	505443	-	DOWNSTREAM	507	LOC105384459	uncharacterized LOC105384459	-	-	-	-	-	-	-
MSTRG.14817.1	NW_011952111.1	688461	693241	-	ncbi_105384465	659978	685046	-	UPSTREAM	3414	LOC105384465	short neuropeptide F	-	-	-	-	-	-	-
MSTRG.14869.2	NW_011952112.1	263651	264765	-	ncbi_105384514	268846	280472	+	UPSTREAM	4080	LOC105384514	uncharacterized LOC105384514	-	-	-	-	-	-	-
MSTRG.14869.1	NW_011952112.1	263651	264900	-	ncbi_105384514	268846	280472	+	UPSTREAM	3945	LOC105384514	uncharacterized LOC105384514	-	-	-	-	-	-	-
MSTRG.15054.1	NW_011952114.1	396477	399745	+	ncbi_105384602	374420	387569	+	DOWNSTREAM	8907	LOC105384602	glutamate dehydrogenase	Metabolism;Metabolism;Metabolism;Metabolism;Metabolism;Metabolism	Global and overview maps;Global and overview maps;Amino acid metabolism;Amino acid metabolism;Energy metabolism;Metabolism of other amino acids	ko01100//Metabolic pathways;ko01200//Carbon metabolism;ko00250//Alanine, aspartate and glutamate metabolism;ko00220//Arginine biosynthesis;ko00910//Nitrogen metabolism;ko00471//D-Glutamine and D-glutamate metabolism	K00261;K00261;K00261;K00261;K00261;K00261	-	-	-
MSTRG.15114.1	NW_011952115.1	12468	43265	+	ncbi_105384671	47046	65621	-	DOWNSTREAM	3780	LOC105384671	synaptic vesicle glycoprotein 2B-like	-	-	-	-	-	-	-
MSTRG.15119.2	NW_011952115.1	69999	84317	+	ncbi_105384671	47046	65621	-	UPSTREAM	4377	LOC105384671	synaptic vesicle glycoprotein 2B-like	-	-	-	-	-	-	-
MSTRG.15119.2	NW_011952115.1	69999	84317	+	ncbi_105384640	91706	101104	-	DOWNSTREAM	7388	LOC105384640	protein TBRG4-like	-	-	-	-	-	-	-
XR_960626.1	NW_011952116.1	353171	354307	+	ncbi_105384715	356066	359648	-	DOWNSTREAM	1758	LOC105384715	kelch-like protein 10	-	-	-	-	-	-	-
MSTRG.15250.1	NW_011952116.1	390342	391864	-	ncbi_105384701	392780	416637	-	DOWNSTREAM	915	LOC105384701	probable phospholipid-transporting ATPase IF	-	-	-	-	-	-	-
MSTRG.15641.1	NW_011952121.1	477367	479539	+	ncbi_105384868	455990	474984	+	DOWNSTREAM	2382	LOC105384868	mitogen-activated protein kinase kinase kinase 12	-	-	-	-	-	-	-
XR_960636.1	NW_011952124.1	666199	666707	+	ncbi_105384998	665252	665966	+	DOWNSTREAM	232	LOC105384998	RNA-binding protein Rsf1-like	-	-	-	-	-	GO:0097159//organic cyclic compound binding	-
MSTRG.15921.1	NW_011952125.1	35214	35637	-	ncbi_105385036	35909	38750	+	UPSTREAM	271	LOC105385036	ribosome biogenesis protein BOP1 homolog	-	-	-	-	-	-	-
MSTRG.16041.1	NW_011952126.1	143581	174263	+	ncbi_105385060	129697	138172	+	DOWNSTREAM	5408	LOC105385060	uncharacterized LOC105385060	-	-	-	-	GO:0043231//intracellular membrane-bounded organelle	GO:0003677//DNA binding	GO:0010468//regulation of gene expression
MSTRG.16312.1	NW_011952129.1	294783	297930	-	ncbi_105385194	304881	312546	+	UPSTREAM	6950	LOC105385194	uncharacterized LOC105385194	-	-	-	-	-	-	-
MSTRG.16411.1	NW_011952130.1	737273	743288	+	ncbi_105385249	745346	746220	-	DOWNSTREAM	2057	LOC105385249	uncharacterized LOC105385249	-	-	-	-	-	-	-
MSTRG.16411.1	NW_011952130.1	737273	743288	+	ncbi_105385250	746664	747674	+	UPSTREAM	3375	LOC105385250	uncharacterized LOC105385250	-	-	-	-	-	-	-
MSTRG.16414.1	NW_011952130.1	751613	753943	+	ncbi_105385249	745346	746220	-	UPSTREAM	5392	LOC105385249	uncharacterized LOC105385249	-	-	-	-	-	-	-
MSTRG.16414.1	NW_011952130.1	751613	753943	+	ncbi_105385250	746664	747674	+	DOWNSTREAM	3938	LOC105385250	uncharacterized LOC105385250	-	-	-	-	-	-	-
MSTRG.16414.1	NW_011952130.1	751613	753943	+	ncbi_105385253	756483	765229	+	UPSTREAM	2539	LOC105385253	probable methylmalonate-semialdehyde dehydrogenase [acylating]	Metabolism;Metabolism;Metabolism;Metabolism;Metabolism;Metabolism	Global and overview maps;Global and overview maps;Carbohydrate metabolism;Amino acid metabolism;Metabolism of other amino acids;Carbohydrate metabolism	ko01100//Metabolic pathways;ko01200//Carbon metabolism;ko00562//Inositol phosphate metabolism;ko00280//Valine, leucine and isoleucine degradation;ko00410//beta-Alanine metabolism;ko00640//Propanoate metabolism	K00140;K00140;K00140;K00140;K00140;K00140	-	-	-
MSTRG.16427.1	NW_011952130.1	832421	833966	-	ncbi_105385258	817545	822458	+	DOWNSTREAM	9962	LOC105385258	probable 4-coumarate--CoA ligase 3	-	-	-	-	-	-	-
MSTRG.16668.1	NW_011952134.1	62262	63294	+	ncbi_105385428	70435	71856	+	UPSTREAM	7140	LOC105385428	COUP transcription factor 2-like	-	-	-	-	GO:0043231//intracellular membrane-bounded organelle	GO:0000981//RNA polymerase II transcription factor activity, sequence-specific DNA binding;GO:0038023//signaling receptor activity	GO:0009755//hormone-mediated signaling pathway;GO:0010468//regulation of gene expression;GO:0034645//cellular macromolecule biosynthetic process
MSTRG.16743.1	NW_011952135.1	324538	330077	+	ncbi_105385440	322170	323425	+	DOWNSTREAM	1112	LOC105385440	uncharacterized LOC105385440	-	-	-	-	-	-	-
MSTRG.16743.1	NW_011952135.1	324538	330077	+	ncbi_105385455	322274	323077	+	DOWNSTREAM	1460	LOC105385455	uncharacterized LOC105385455	-	-	-	-	-	-	-
MSTRG.16760.1	NW_011952135.1	574011	613252	+	ncbi_105385463	616338	617040	+	UPSTREAM	3085	LOC105385463	putative nuclease HARBI1	-	-	-	-	-	-	-
MSTRG.16768.1	NW_011952135.1	626106	642609	+	ncbi_105385463	616338	617040	+	DOWNSTREAM	9065	LOC105385463	putative nuclease HARBI1	-	-	-	-	-	-	-
MSTRG.16776.2	NW_011952135.1	666535	672128	+	ncbi_105385446	659249	666288	-	UPSTREAM	246	LOC105385446	uncharacterized LOC105385446	-	-	-	-	-	-	-
MSTRG.16776.2	NW_011952135.1	666535	672128	+	ncbi_105385466	681410	682665	-	DOWNSTREAM	9281	LOC105385466	DNA-directed RNA polymerase I subunit rpa49-like	Metabolism;Metabolism;Metabolism;Genetic Information Processing	Global and overview maps;Nucleotide metabolism;Nucleotide metabolism;Transcription	ko01100//Metabolic pathways;ko00230//Purine metabolism;ko00240//Pyrimidine metabolism;ko03020//RNA polymerase	K03005;K03005;K03005;K03005	-	-	-
MSTRG.16791.2	NW_011952135.1	765602	767108	+	ncbi_105385449	760077	765041	+	DOWNSTREAM	560	LOC105385449	dnaJ homolog subfamily C member 22	-	-	-	-	-	-	-
MSTRG.16823.1	NW_011952136.1	231934	233352	-	ncbi_105385477	234661	243092	-	DOWNSTREAM	1308	LOC105385477	uncharacterized LOC105385477	-	-	-	-	-	-	-
MSTRG.16847.1	NW_011952136.1	483054	484082	-	ncbi_105385485	476869	480428	-	UPSTREAM	2625	LOC105385485	lipase 3	-	-	-	-	-	-	-
MSTRG.16861.1	NW_011952136.1	698548	699136	-	ncbi_105385497	702885	706718	+	UPSTREAM	3748	LOC105385497	uncharacterized protein K02A2.6-like	-	-	-	-	-	-	-
MSTRG.16917.1	NW_011952137.1	625622	634681	+	ncbi_105385526	643885	665109	-	DOWNSTREAM	9203	LOC105385526	DNA mismatch repair protein Msh2-like	Genetic Information Processing	Replication and repair	ko03430//Mismatch repair	K08735	-	-	-
MSTRG.16981.2	NW_011952138.1	403411	405087	+	ncbi_105385544	414177	429513	-	DOWNSTREAM	9089	LOC105385544	myrosinase 1-like	-	-	-	-	-	-	-
MSTRG.17000.1	NW_011952138.1	521573	522792	-	ncbi_105385553	506073	521332	+	DOWNSTREAM	240	LOC105385553	mitochondrial uncoupling protein 4	-	-	-	-	GO:0031090//organelle membrane;GO:0031967//organelle envelope	-	GO:0044765//single-organism transport
MSTRG.17040.1	NW_011952139.1	60853	66106	-	ncbi_105385583	58173	60058	+	DOWNSTREAM	794	LOC105385583	uncharacterized LOC105385583	-	-	-	-	-	-	-
MSTRG.17040.1	NW_011952139.1	60853	66106	-	ncbi_105385584	66155	68965	-	DOWNSTREAM	48	LOC105385584	UDP-glucuronosyltransferase 3A1-like	Metabolism;Metabolism;Metabolism;Metabolism;Metabolism;Metabolism;Metabolism;Metabolism;Metabolism;Metabolism	Global and overview maps;Global and overview maps;Carbohydrate metabolism;Carbohydrate metabolism;Xenobiotics biodegradation and metabolism;Xenobiotics biodegradation and metabolism;Metabolism of cofactors and vitamins;Xenobiotics biodegradation and metabolism;Carbohydrate metabolism;Metabolism of cofactors and vitamins	ko01100//Metabolic pathways;ko01110//Biosynthesis of secondary metabolites;ko00500//Starch and sucrose metabolism;ko00040//Pentose and glucuronate interconversions;ko00983//Drug metabolism - other enzymes;ko00980//Metabolism of xenobiotics by cytochrome P450;ko00860//Porphyrin and chlorophyll metabolism;ko00982//Drug metabolism - cytochrome P450;ko00053//Ascorbate and aldarate metabolism;ko00830/…	K00699;K00699;K00699;K00699;K00699;K00699;K00699;K00699;K00699;K00699	-	GO:0016757//transferase activity, transferring glycosyl groups	-
MSTRG.17040.1	NW_011952139.1	60853	66106	-	ncbi_105385595	75297	79506	-	DOWNSTREAM	9190	LOC105385595	uncharacterized LOC105385595	-	-	-	-	-	-	-
MSTRG.17209.1	NW_011952141.1	225004	225946	+	ncbi_105385653	211886	219663	+	DOWNSTREAM	5340	LOC105385653	UDP-N-acetylglucosamine transporter	-	-	-	-	-	-	-
MSTRG.17325.1	NW_011952143.1	300585	302396	-	ncbi_105385723	187806	297679	-	UPSTREAM	2905	LOC105385723	putative uncharacterized protein DDB_G0282133	-	-	-	-	-	-	-
MSTRG.17345.1	NW_011952143.1	464439	537846	-	ncbi_105385733	545125	551129	+	UPSTREAM	7278	LOC105385733	carboxypeptidase B-like	-	-	-	-	-	-	-
MSTRG.17345.1	NW_011952143.1	464439	537846	-	ncbi_105385735	540665	543274	+	UPSTREAM	2818	LOC105385735	carboxypeptidase B-like	-	-	-	-	-	-	-
MSTRG.17352.1	NW_011952143.1	565630	585832	+	ncbi_105385737	560352	563622	-	UPSTREAM	2007	LOC105385737	carboxypeptidase B-like	-	-	-	-	-	-	-
MSTRG.17352.1	NW_011952143.1	565630	585832	+	ncbi_105385739	591682	595088	+	UPSTREAM	5849	LOC105385739	zinc carboxypeptidase-like	-	-	-	-	-	-	-
MSTRG.17352.1	NW_011952143.1	565630	585832	+	ncbi_105385736	556076	559689	-	UPSTREAM	5940	LOC105385736	zinc carboxypeptidase-like	-	-	-	-	-	-	-
MSTRG.17352.1	NW_011952143.1	565630	585832	+	ncbi_105385738	587012	590156	-	DOWNSTREAM	1179	LOC105385738	carboxypeptidase B-like	-	-	-	-	-	-	-
MSTRG.17356.1	NW_011952143.1	584098	586833	-	ncbi_105385739	591682	595088	+	UPSTREAM	4848	LOC105385739	zinc carboxypeptidase-like	-	-	-	-	-	-	-
MSTRG.17356.1	NW_011952143.1	584098	586833	-	ncbi_105385740	596029	599057	+	UPSTREAM	9195	LOC105385740	zinc carboxypeptidase-like	-	-	-	-	-	-	-
MSTRG.17356.1	NW_011952143.1	584098	586833	-	ncbi_105385738	587012	590156	-	DOWNSTREAM	178	LOC105385738	carboxypeptidase B-like	-	-	-	-	-	-	-
MSTRG.17388.1	NW_011952143.1	778011	784932	-	ncbi_105385748	776059	777642	-	UPSTREAM	368	LOC105385748	congested-like trachea protein	-	-	-	-	GO:0031224//intrinsic component of membrane	-	GO:0044763//single-organism cellular process
MSTRG.17460.1	NW_011952145.1	179721	181436	-	ncbi_105385784	167042	175620	-	UPSTREAM	4100	LOC105385784	nucleosome assembly protein 1-like 1	-	-	-	-	-	-	GO:0034728//nucleosome organization
MSTRG.17559.1	NW_011952146.1	33250	34963	+	ncbi_105385830	16137	29120	+	DOWNSTREAM	4129	LOC105385830	uncharacterized LOC105385830	-	-	-	-	-	-	-
MSTRG.17561.1	NW_011952146.1	37482	40041	+	ncbi_105385830	16137	29120	+	DOWNSTREAM	8361	LOC105385830	uncharacterized LOC105385830	-	-	-	-	-	-	-
MSTRG.17563.1	NW_011952146.1	48909	49900	+	ncbi_105385831	51393	55491	-	DOWNSTREAM	1492	LOC105385831	uncharacterized LOC105385831	-	-	-	-	-	-	-
MSTRG.17563.1	NW_011952146.1	48909	49900	+	ncbi_105385832	56536	58324	+	UPSTREAM	6635	LOC105385832	E3 ubiquitin-protein ligase RNF181-like	-	-	-	-	-	-	-
MSTRG.17564.1	NW_011952146.1	49899	50963	-	ncbi_105385831	51393	55491	-	DOWNSTREAM	429	LOC105385831	uncharacterized LOC105385831	-	-	-	-	-	-	-
MSTRG.17564.1	NW_011952146.1	49899	50963	-	ncbi_105385832	56536	58324	+	UPSTREAM	5572	LOC105385832	E3 ubiquitin-protein ligase RNF181-like	-	-	-	-	-	-	-
MSTRG.17652.1	NW_011952147.1	8511	18746	+	MSTRG.17651	6415	8087	+	DOWNSTREAM	423	GIP	Retrovirus-related Pol polyprotein from transposon TNT 1-94 [Papilio machaon]	-	-	-	-	-	-	-
MSTRG.17652.1	NW_011952147.1	8511	18746	+	ncbi_105385906	20229	37410	+	UPSTREAM	1482	LOC105385906	hydrocephalus-inducing protein homolog	-	-	-	-	-	-	-
MSTRG.17721.1	NW_011952147.1	481374	481763	+	ncbi_105385900	477264	479224	-	UPSTREAM	2149	LOC105385900	pyruvate kinase-like	Metabolism;Metabolism;Metabolism;Metabolism;Metabolism;Metabolism;Metabolism;Metabolism;Metabolism	Global and overview maps;Global and overview maps;Global and overview maps;Global and overview maps;Nucleotide metabolism;Global and overview maps;Global and overview maps;Carbohydrate metabolism;Carbohydrate metabolism	ko01100//Metabolic pathways;ko01110//Biosynthesis of secondary metabolites;ko01130//Biosynthesis of antibiotics;ko01120//Microbial metabolism in diverse environments;ko00230//Purine metabolism;ko01200//Carbon metabolism;ko01230//Biosynthesis of amino acids;ko00620//Pyruvate metabolism;ko00010//Glycolysis / Gluconeogenesis	K00873;K00873;K00873;K00873;K00873;K00873;K00873;K00873;K00873	-	-	-
MSTRG.17721.1	NW_011952147.1	481374	481763	+	ncbi_105385913	437592	476028	-	UPSTREAM	5345	LOC105385913	serine-protein kinase ATM	Environmental Information Processing	Signal transduction	ko04068//FoxO signaling pathway	K04728	-	-	-
MSTRG.17761.1	NW_011952148.1	21493	26842	-	MSTRG.17759	18198	18739	+	DOWNSTREAM	2753	RXLR78	endonuclease-reverse transcriptase [Bombyx mori]	-	-	-	-	-	-	-
MSTRG.17765.1	NW_011952148.1	51878	54471	+	ncbi_105385924	50832	51605	-	UPSTREAM	272	LOC105385924	NADH dehydrogenase [ubiquinone] 1 beta subcomplex subunit 3	Metabolism;Metabolism	Global and overview maps;Energy metabolism	ko01100//Metabolic pathways;ko00190//Oxidative phosphorylation	K03959;K03959	-	-	-
MSTRG.17765.1	NW_011952148.1	51878	54471	+	ncbi_105385923	43543	50602	+	DOWNSTREAM	1275	LOC105385923	DNA ligase 1-like	Genetic Information Processing;Genetic Information Processing;Genetic Information Processing;Genetic Information Processing	Replication and repair;Replication and repair;Replication and repair;Replication and repair	ko03420//Nucleotide excision repair;ko03030//DNA replication;ko03410//Base excision repair;ko03430//Mismatch repair	K10747;K10747;K10747;K10747	-	-	-
MSTRG.17765.1	NW_011952148.1	51878	54471	+	MSTRG.17770	63274	70275	-	DOWNSTREAM	8802	--	Transposon Ty3-G Gag-Pol polyprotein [Papilio machaon]	-	-	-	-	-	-	-
MSTRG.17778.1	NW_011952148.1	97075	103115	-	ncbi_105385939	82881	88624	+	DOWNSTREAM	8450	LOC105385939	prolow-density lipoprotein receptor-related protein 1-like	-	-	-	-	-	-	-
MSTRG.17891.1	NW_011952149.1	550183	553429	-	ncbi_105385967	542276	547265	+	DOWNSTREAM	2917	LOC105385967	nucleosomal histone kinase 1-like	-	-	-	-	-	GO:0016772//transferase activity, transferring phosphorus-containing groups	-
MSTRG.18006.1	NW_011952151.1	103469	108013	-	ncbi_105386048	101106	103022	+	DOWNSTREAM	446	LOC105386048	uncharacterized LOC105386048	-	-	-	-	-	-	-
MSTRG.18069.1	NW_011952152.1	151028	152268	+	ncbi_105386104	157394	161110	-	DOWNSTREAM	5125	LOC105386104	probable cytochrome P450 304a1	-	-	-	-	-	-	-
MSTRG.18144.1	NW_011952152.1	765926	767557	-	ncbi_105386100	757050	765842	+	DOWNSTREAM	83	LOC105386100	dnaJ homolog subfamily C member 21	-	-	-	-	-	-	-
MSTRG.18169.2	NW_011952153.1	196251	197678	-	ncbi_105386129	193315	195084	+	DOWNSTREAM	1166	LOC105386129	zinc finger protein GLIS2-like	-	-	-	-	-	-	-
MSTRG.18212.1	NW_011952153.1	582697	583346	+	ncbi_105386149	557880	582543	+	DOWNSTREAM	153	LOC105386149	homocysteine S-methyltransferase 1-like	Metabolism;Metabolism;Metabolism	Global and overview maps;Global and overview maps;Amino acid metabolism	ko01100//Metabolic pathways;ko01110//Biosynthesis of secondary metabolites;ko00270//Cysteine and methionine metabolism	K00547;K00547;K00547	-	-	-
MSTRG.18242.1	NW_011952153.1	762064	764438	+	ncbi_105386167	764969	766399	-	DOWNSTREAM	530	LOC105386167	uncharacterized LOC105386167	-	-	-	-	-	-	-
MSTRG.18343.1	NW_011952155.1	382875	383455	+	ncbi_105386240	388553	390349	+	UPSTREAM	5097	LOC105386240	leucine-rich repeat-containing protein 71-like	-	-	-	-	-	-	-
XR_960696.1	NW_011952157.1	449649	452475	-	ncbi_105386323	447874	449552	+	DOWNSTREAM	96	LOC105386323	uricase	Metabolism;Metabolism;Metabolism;Metabolism	Global and overview maps;Global and overview maps;Nucleotide metabolism;Biosynthesis of other secondary metabolites	ko01100//Metabolic pathways;ko01120//Microbial metabolism in diverse environments;ko00230//Purine metabolism;ko00232//Caffeine metabolism	K00365;K00365;K00365;K00365	GO:0042579//microbody	GO:0003824//catalytic activity	GO:0009112//nucleobase metabolic process;GO:0044282//small molecule catabolic process
MSTRG.18499.3	NW_011952157.1	688338	707821	-	ncbi_105386306	709924	722586	+	UPSTREAM	2102	LOC105386306	myosin-VIIa-like	-	-	-	-	-	-	-
XR_960700.1	NW_011952158.1	730631	732443	-	ncbi_105386351	725068	725703	+	DOWNSTREAM	4927	LOC105386351	40S ribosomal protein S24	Genetic Information Processing	Translation	ko03010//Ribosome	K02974	GO:0030529//intracellular ribonucleoprotein complex	GO:0005198//structural molecule activity	GO:0010467//gene expression
XR_960700.1	NW_011952158.1	730631	732443	-	ncbi_105386352	739381	751089	-	DOWNSTREAM	6937	LOC105386352	pyridoxal-dependent decarboxylase domain-containing protein 1	-	-	-	-	-	-	-
MSTRG.18590.1	NW_011952158.1	736210	738395	-	ncbi_105386352	739381	751089	-	DOWNSTREAM	985	LOC105386352	pyridoxal-dependent decarboxylase domain-containing protein 1	-	-	-	-	-	-	-
MSTRG.18762.1	NW_011952160.1	543876	547367	-	ncbi_105386443	533260	535765	-	UPSTREAM	8110	LOC105386443	E3 ubiquitin-protein ligase rnf146	-	-	-	-	-	-	-
MSTRG.18830.2	NW_011952161.1	637203	640095	-	ncbi_105386480	628102	628949	-	UPSTREAM	8253	LOC105386480	uncharacterized LOC105386480	-	-	-	-	-	-	-
MSTRG.18830.2	NW_011952161.1	637203	640095	-	ncbi_105386481	631538	636397	-	UPSTREAM	805	LOC105386481	uncharacterized LOC105386481	-	-	-	-	-	-	-
MSTRG.18830.2	NW_011952161.1	637203	640095	-	ncbi_105386479	617576	627509	-	UPSTREAM	9693	LOC105386479	uncharacterized LOC105386479	Genetic Information Processing	Transcription	ko03040//Spliceosome	K12870	-	-	-
MSTRG.18944.1	NW_011952163.1	411397	412701	+	ncbi_105386557	380397	410505	+	DOWNSTREAM	891	LOC105386557	aquaporin AQPAn.G	-	-	-	-	GO:0031224//intrinsic component of membrane	-	GO:0051234//establishment of localization
MSTRG.18962.1	NW_011952163.1	635501	642137	+	ncbi_105386563	620821	625603	-	UPSTREAM	9897	LOC105386563	zinc finger protein 91-like	-	-	-	-	-	-	-
MSTRG.19014.4	NW_011952164.1	350498	366048	-	MSTRG.19018	370529	371233	-	DOWNSTREAM	4480	--	Transporter-like protein [Operophtera brumata]	-	-	-	-	-	-	-
MSTRG.19014.4	NW_011952164.1	350498	366048	-	ncbi_105386599	375181	376955	+	UPSTREAM	9132	LOC105386599	uncharacterized LOC105386599	-	-	-	-	-	-	-
MSTRG.19019.1	NW_011952164.1	373419	373924	+	MSTRG.19018	370529	371233	-	UPSTREAM	2185	--	Transporter-like protein [Operophtera brumata]	-	-	-	-	-	-	-
MSTRG.19019.1	NW_011952164.1	373419	373924	+	ncbi_105386598	319822	369564	-	UPSTREAM	3854	LOC105386598	protein GDAP2 homolog	-	-	-	-	-	-	-
MSTRG.19019.1	NW_011952164.1	373419	373924	+	ncbi_105386599	375181	376955	+	UPSTREAM	1256	LOC105386599	uncharacterized LOC105386599	-	-	-	-	-	-	-
MSTRG.19022.1	NW_011952164.1	380659	385283	+	MSTRG.19018	370529	371233	-	UPSTREAM	9425	--	Transporter-like protein [Operophtera brumata]	-	-	-	-	-	-	-
MSTRG.19022.1	NW_011952164.1	380659	385283	+	ncbi_105386599	375181	376955	+	DOWNSTREAM	3703	LOC105386599	uncharacterized LOC105386599	-	-	-	-	-	-	-
MSTRG.19062.1	NW_011952164.1	700825	701462	+	ncbi_105386609	706330	709748	-	DOWNSTREAM	4867	LOC105386609	probable serine/threonine-protein kinase DDB_G0278845	-	-	-	-	-	-	-
MSTRG.19224.1	NW_011952166.1	717464	718110	-	ncbi_105386694	718422	721602	-	DOWNSTREAM	311	LOC105386694	alpha-N-acetylglucosaminidase-like	Metabolism;Cellular Processes;Metabolism	Global and overview maps;Transport and catabolism;Glycan biosynthesis and metabolism	ko01100//Metabolic pathways;ko04142//Lysosome;ko00531//Glycosaminoglycan degradation	K01205;K01205;K01205	-	-	-
MSTRG.19226.2	NW_011952166.1	723390	725466	-	ncbi_105386694	718422	721602	-	UPSTREAM	1787	LOC105386694	alpha-N-acetylglucosaminidase-like	Metabolism;Cellular Processes;Metabolism	Global and overview maps;Transport and catabolism;Glycan biosynthesis and metabolism	ko01100//Metabolic pathways;ko04142//Lysosome;ko00531//Glycosaminoglycan degradation	K01205;K01205;K01205	-	-	-
XR_960721.1	NW_011952168.1	167197	171066	-	ncbi_105386762	180622	184815	-	DOWNSTREAM	9555	LOC105386762	guanine nucleotide-releasing factor 2-like	-	-	-	-	-	-	-
XR_960721.1	NW_011952168.1	167197	171066	-	ncbi_105386761	173069	180399	-	DOWNSTREAM	2002	LOC105386761	uncharacterized LOC105386761	-	-	-	-	-	-	-
XR_960721.1	NW_011952168.1	167197	171066	-	ncbi_105386730	101272	159975	+	DOWNSTREAM	7221	LOC105386730	syntaxin-1A	Genetic Information Processing	Folding, sorting and degradation	ko04130//SNARE interactions in vesicular transport	K04560	-	-	-
MSTRG.19300.1	NW_011952168.1	206931	208036	+	ncbi_105386763	210088	212109	+	UPSTREAM	2051	LOC105386763	parafibromin-like	-	-	-	-	-	-	-
MSTRG.19310.3	NW_011952168.1	256138	258611	+	ncbi_105386735	258705	315894	-	DOWNSTREAM	93	LOC105386735	b(0	-	-	-	-	-	-	-
MSTRG.19378.1	NW_011952169.1	392302	392811	-	ncbi_105386781	292381	390201	-	UPSTREAM	2100	LOC105386781	homeotic protein antennapedia	-	-	-	-	-	-	-
MSTRG.19413.1	NW_011952170.1	146025	150432	+	ncbi_105386831	158785	170385	-	DOWNSTREAM	8352	LOC105386831	uncharacterized LOC105386831	-	-	-	-	-	-	-
MSTRG.19553.1	NW_011952171.1	601815	603357	+	ncbi_105386880	603374	604263	-	DOWNSTREAM	16	LOC105386880	coiled-coil domain-containing protein 86	-	-	-	-	-	-	-
MSTRG.19553.1	NW_011952171.1	601815	603357	+	ncbi_105386879	586974	601567	+	DOWNSTREAM	247	LOC105386879	signal peptide peptidase-like 3	-	-	-	-	GO:0031224//intrinsic component of membrane	-	GO:0019538//protein metabolic process
MSTRG.19562.1	NW_011952171.1	655338	659149	-	ncbi_105386890	637792	651878	-	UPSTREAM	3459	LOC105386890	fatty acid synthase-like	Metabolism;Metabolism;Metabolism	Global and overview maps;Global and overview maps;Lipid metabolism	ko01100//Metabolic pathways;ko01212//Fatty acid metabolism;ko00061//Fatty acid biosynthesis	K00665;K00665;K00665	-	-	-
MSTRG.19562.1	NW_011952171.1	655338	659149	-	ncbi_105386889	659495	673300	-	DOWNSTREAM	345	LOC105386889	fatty acid synthase-like	Metabolism;Metabolism;Metabolism	Global and overview maps;Global and overview maps;Lipid metabolism	ko01100//Metabolic pathways;ko01212//Fatty acid metabolism;ko00061//Fatty acid biosynthesis	K00665;K00665;K00665	-	-	-
MSTRG.19579.1	NW_011952172.1	146757	149269	-	ncbi_105386913	140488	142394	+	DOWNSTREAM	4362	LOC105386913	uncharacterized LOC105386913	-	-	-	-	-	-	-
MSTRG.19634.2	NW_011952172.1	593990	595109	-	ncbi_105386929	581141	584334	+	DOWNSTREAM	9655	LOC105386929	protein CNPPD1	-	-	-	-	-	-	-
MSTRG.19634.2	NW_011952172.1	593990	595109	-	ncbi_105386932	593025	593890	+	DOWNSTREAM	99	LOC105386932	selenoprotein M-like	-	-	-	-	-	-	-
MSTRG.19634.2	NW_011952172.1	593990	595109	-	ncbi_105386959	597124	626906	-	DOWNSTREAM	2014	LOC105386959	serine/threonine-protein kinase BRSK2-like	-	-	-	-	-	-	-
XR_960736.1	NW_011952172.1	644197	650119	-	ncbi_105386937	637546	638448	-	UPSTREAM	5748	LOC105386937	small integral membrane protein 12-like	-	-	-	-	-	-	-
MSTRG.19682.1	NW_011952173.1	271227	273746	-	ncbi_105386975	255500	267154	-	UPSTREAM	4072	LOC105386975	extensin	-	-	-	-	-	-	-
MSTRG.19684.1	NW_011952173.1	275544	573073	-	ncbi_105386994	582318	584273	-	DOWNSTREAM	9244	LOC105386994	uncharacterized protein CG16817-like	Metabolism;Metabolism	Global and overview maps;Lipid metabolism	ko01100//Metabolic pathways;ko00590//Arachidonic acid metabolism	K15730;K15730	-	-	-
MSTRG.19684.1	NW_011952173.1	275544	573073	-	ncbi_105386975	255500	267154	-	UPSTREAM	8389	LOC105386975	extensin	-	-	-	-	-	-	-
MSTRG.19701.1	NW_011952173.1	482510	482937	+	ncbi_105386993	489205	513407	+	UPSTREAM	6267	LOC105386993	probable multidrug resistance-associated protein lethal(2)03659	Environmental Information Processing	Membrane transport	ko02010//ABC transporters	K05673	-	-	-
MSTRG.19703.1	NW_011952173.1	506954	508358	+	ncbi_105386992	513535	533108	-	DOWNSTREAM	5176	LOC105386992	probable multidrug resistance-associated protein lethal(2)03659	Environmental Information Processing	Membrane transport	ko02010//ABC transporters	K05673	-	-	-
XR_960738.1	NW_011952173.1	537097	539854	-	ncbi_105387009	539917	547001	-	DOWNSTREAM	62	LOC105387009	uncharacterized LOC105387009	-	-	-	-	-	-	-
XR_960738.1	NW_011952173.1	537097	539854	-	ncbi_105386992	513535	533108	-	UPSTREAM	3988	LOC105386992	probable multidrug resistance-associated protein lethal(2)03659	Environmental Information Processing	Membrane transport	ko02010//ABC transporters	K05673	-	-	-
MSTRG.19715.1	NW_011952173.1	612981	616946	+	ncbi_105386999	602700	603314	-	UPSTREAM	9666	LOC105386999	p53 and DNA damage-regulated protein 1	-	-	-	-	-	-	-
MSTRG.19752.1	NW_011952174.1	161673	177832	+	ncbi_105387019	187219	188625	-	DOWNSTREAM	9386	LOC105387019	speckle-type POZ protein-like	-	-	-	-	-	-	-
MSTRG.19758.1	NW_011952174.1	200223	206093	+	ncbi_105387023	188806	195031	-	UPSTREAM	5191	LOC105387023	folylpolyglutamate synthase	Metabolism;Metabolism	Global and overview maps;Metabolism of cofactors and vitamins	ko01100//Metabolic pathways;ko00790//Folate biosynthesis	K01930;K01930	-	-	-
MSTRG.19758.1	NW_011952174.1	200223	206093	+	ncbi_105387024	208041	219474	-	DOWNSTREAM	1947	LOC105387024	heat shock 70 kDa protein cognate 3	Metabolism;Metabolism;Metabolism;Metabolism	Global and overview maps;Global and overview maps;Global and overview maps;Metabolism of cofactors and vitamins	ko01100//Metabolic pathways;ko01110//Biosynthesis of secondary metabolites;ko01120//Microbial metabolism in diverse environments;ko00860//Porphyrin and chlorophyll metabolism	K01698;K01698;K01698;K01698	-	-	-
MSTRG.19778.1	NW_011952174.1	315969	318657	-	ncbi_105387026	327497	336110	-	DOWNSTREAM	8839	LOC105387026	zonadhesin-like	-	-	-	-	-	-	-
MSTRG.19888.1	NW_011952175.1	698379	699001	-	ncbi_105387087	695949	698305	-	UPSTREAM	73	LOC105387087	pancreatic triacylglycerol lipase-like	-	-	-	-	-	-	-
MSTRG.20054.1	NW_011952178.1	314861	319154	+	ncbi_105387156	303892	306392	+	DOWNSTREAM	8468	LOC105387156	facilitated trehalose transporter Tret1-like	-	-	-	-	-	-	-
MSTRG.20086.1	NW_011952179.1	8561	11551	+	ncbi_105387201	17076	54773	-	DOWNSTREAM	5524	LOC105387201	dynein heavy chain 3	-	-	-	-	-	-	-
MSTRG.20310.1	NW_011952181.1	311647	312064	-	ncbi_105387252	312160	316564	-	DOWNSTREAM	95	LOC105387252	reticulocyte-binding protein 2 homolog a-like	-	-	-	-	-	-	-
MSTRG.20310.1	NW_011952181.1	311647	312064	-	ncbi_105387253	317013	370347	+	UPSTREAM	4948	LOC105387253	zinc metalloproteinase-disintegrin-like 4a	-	-	-	-	-	-	-
MSTRG.20341.1	NW_011952181.1	614384	622456	-	ncbi_105387259	607431	610197	-	UPSTREAM	4186	LOC105387259	sterol O-acyltransferase 1-like	Metabolism	Lipid metabolism	ko00100//Steroid biosynthesis	K00637	-	-	-
MSTRG.20341.1	NW_011952181.1	614384	622456	-	ncbi_105387246	623582	626703	-	DOWNSTREAM	1125	LOC105387246	fungal protease inhibitor-1-like	-	-	-	-	-	-	-
MSTRG.20360.1	NW_011952182.1	192327	193673	+	ncbi_105387261	147958	192104	+	DOWNSTREAM	222	LOC105387261	tolloid-like protein 1	-	-	-	-	-	-	-
MSTRG.20362.2	NW_011952182.1	196972	197474	+	ncbi_105387261	147958	192104	+	DOWNSTREAM	4867	LOC105387261	tolloid-like protein 1	-	-	-	-	-	-	-
MSTRG.20434.2	NW_011952183.1	597715	603246	+	ncbi_105387295	593761	594665	-	UPSTREAM	3049	LOC105387295	28S ribosomal protein S17	Genetic Information Processing	Translation	ko03010//Ribosome	K02961	GO:0030529//intracellular ribonucleoprotein complex	-	GO:0010467//gene expression
MSTRG.20434.2	NW_011952183.1	597715	603246	+	ncbi_105387296	595267	596636	-	UPSTREAM	1078	LOC105387296	peroxisomal membrane protein 11B	Cellular Processes	Transport and catabolism	ko04146//Peroxisome	K13352	-	-	-
MSTRG.20434.2	NW_011952183.1	597715	603246	+	ncbi_105387300	607628	612000	-	DOWNSTREAM	4381	LOC105387300	uncharacterized LOC105387300	-	-	-	-	-	-	-
MSTRG.20434.2	NW_011952183.1	597715	603246	+	ncbi_105387294	582994	593690	+	DOWNSTREAM	4024	LOC105387294	RNA polymerase II subunit A C-terminal domain phosphatase	-	-	-	-	-	-	-
MSTRG.20434.2	NW_011952183.1	597715	603246	+	ncbi_105387312	612099	623772	-	DOWNSTREAM	8852	LOC105387312	putative leucine-rich repeat-containing protein DDB_G0290503	-	-	-	-	-	-	-
MSTRG.20448.1	NW_011952184.1	124347	157790	+	ncbi_105387341	97201	119541	+	DOWNSTREAM	4805	LOC105387341	serine/threonine-protein kinase minibrain	-	-	-	-	-	-	-
MSTRG.20473.2	NW_011952184.1	263959	290921	-	ncbi_105387323	254421	256020	+	DOWNSTREAM	7938	LOC105387323	39S ribosomal protein L15	Genetic Information Processing	Translation	ko03010//Ribosome	K02876	-	-	-
MSTRG.20473.2	NW_011952184.1	263959	290921	-	ncbi_105387322	256015	261272	-	UPSTREAM	2686	LOC105387322	adenosylhomocysteinase	Metabolism;Metabolism	Global and overview maps;Amino acid metabolism	ko01100//Metabolic pathways;ko00270//Cysteine and methionine metabolism	K01251;K01251	-	GO:0003824//catalytic activity	GO:0044237//cellular metabolic process
MSTRG.20525.2	NW_011952185.1	117284	127380	-	ncbi_105387358	103618	108403	+	DOWNSTREAM	8880	LOC105387358	protein CLP1 homolog	Genetic Information Processing	Translation	ko03015//mRNA surveillance pathway	K14399	-	-	-
MSTRG.20525.2	NW_011952185.1	117284	127380	-	ncbi_105387372	136842	144777	-	DOWNSTREAM	9461	LOC105387372	alanine--tRNA ligase	Genetic Information Processing	Translation	ko00970//Aminoacyl-tRNA biosynthesis	K01872	-	-	-
MSTRG.20539.1	NW_011952185.1	245858	253151	+	ncbi_105387373	203867	245680	-	UPSTREAM	177	LOC105387373	cell growth regulator with RING finger domain protein 1-like	-	-	-	-	-	-	-
MSTRG.20561.1	NW_011952185.1	475774	479108	+	ncbi_105387375	468361	473296	-	UPSTREAM	2477	LOC105387375	uncharacterized LOC105387375	-	-	-	-	-	-	-
MSTRG.20561.1	NW_011952185.1	475774	479108	+	ncbi_105387374	404225	468237	+	DOWNSTREAM	7536	LOC105387374	rap1 GTPase-activating protein 1-like	-	-	-	-	-	-	-
MSTRG.20562.1	NW_011952185.1	476235	477027	-	ncbi_105387375	468361	473296	-	UPSTREAM	2938	LOC105387375	uncharacterized LOC105387375	-	-	-	-	-	-	-
MSTRG.20562.1	NW_011952185.1	476235	477027	-	ncbi_105387374	404225	468237	+	DOWNSTREAM	7997	LOC105387374	rap1 GTPase-activating protein 1-like	-	-	-	-	-	-	-
MSTRG.20627.1	NW_011952186.1	352968	361355	+	ncbi_105387409	370932	382014	+	UPSTREAM	9576	LOC105387409	carbonic anhydrase 1	Metabolism	Energy metabolism	ko00910//Nitrogen metabolism	K01672	-	-	-
MSTRG.20674.2	NW_011952187.1	100746	102479	+	ncbi_105387422	83892	94646	-	UPSTREAM	6099	LOC105387422	histone-lysine N-methyltransferase PRDM9-like	-	-	-	-	-	-	-
MSTRG.20682.1	NW_011952187.1	162363	166700	+	ncbi_105387423	166766	168746	+	UPSTREAM	65	LOC105387423	uncharacterized LOC105387423	-	-	-	-	-	-	-
MSTRG.20784.1	NW_011952188.1	417291	417549	-	MSTRG.20785	422467	423932	+	UPSTREAM	4917	--	PREDICTED: Ca(2+)/calmodulin-responsive adenylate cyclase-like [Plutella xylostella]	-	-	-	-	-	-	-
MSTRG.20784.1	NW_011952188.1	417291	417549	-	ncbi_105387464	407728	410663	+	DOWNSTREAM	6627	LOC105387464	uncharacterized LOC105387464	-	-	-	-	-	-	-
MSTRG.20929.1	NW_011952190.1	248980	287971	-	MSTRG.20925	213188	242441	-	UPSTREAM	6538	--	-	-	-	-	-	-	-	-
MSTRG.20960.2	NW_011952190.1	530020	530606	+	MSTRG.20958	514994	528402	-	UPSTREAM	1617	pif1	ATP-dependent DNA helicase PIF1 [Folsomia candida]	-	-	-	-	-	-	-
MSTRG.20987.1	NW_011952191.1	8677	10363	-	ncbi_105387566	11662	44007	-	DOWNSTREAM	1298	LOC105387566	protein I'm not dead yet-like	-	-	-	-	-	-	-
MSTRG.21033.2	NW_011952192.1	36626	37792	+	ncbi_105387605	41163	43663	-	DOWNSTREAM	3370	LOC105387605	uncharacterized LOC105387605	-	-	-	-	-	-	-
MSTRG.21050.1	NW_011952192.1	123336	125181	-	ncbi_105387589	116276	117504	+	DOWNSTREAM	5831	LOC105387589	probable basic-leucine zipper transcription factor N	-	-	-	-	-	-	-
MSTRG.21050.1	NW_011952192.1	123336	125181	-	ncbi_105387588	117933	120057	-	UPSTREAM	3278	LOC105387588	putative nuclease HARBI1	-	-	-	-	-	-	-
MSTRG.21050.1	NW_011952192.1	123336	125181	-	ncbi_105387591	134134	135154	-	DOWNSTREAM	8952	LOC105387591	copper transport protein ATOX1	-	-	-	-	-	-	-
MSTRG.21050.1	NW_011952192.1	123336	125181	-	ncbi_105387590	130768	134033	+	UPSTREAM	5586	LOC105387590	POC1 centriolar protein homolog A-like	-	-	-	-	-	-	-
MSTRG.21109.1	NW_011952193.1	40778	41630	-	ncbi_105387614	43678	73086	-	DOWNSTREAM	2047	LOC105387614	putative DNA helicase Ino80	-	-	-	-	-	-	-
MSTRG.21210.2	NW_011952194.1	557942	559146	-	ncbi_105387645	559529	574911	+	UPSTREAM	382	LOC105387645	rac GTPase-activating protein 1-like	-	-	-	-	-	-	-
MSTRG.21408.1	NW_011952197.1	447852	448930	+	ncbi_105387739	451021	453775	+	UPSTREAM	2090	LOC105387739	U3 small nucleolar ribonucleoprotein protein IMP4	Genetic Information Processing	Translation	ko03008//Ribosome biogenesis in eukaryotes	K14561	-	-	-
MSTRG.21408.1	NW_011952197.1	447852	448930	+	ncbi_105387760	440655	444071	+	DOWNSTREAM	3780	LOC105387760	protein PFC0760c	-	-	-	-	-	-	-
MSTRG.21477.1	NW_011952198.1	370894	372003	+	ncbi_105387770	364722	365582	+	DOWNSTREAM	5311	LOC105387770	plasmatocyte-spreading peptide-like	-	-	-	-	-	-	-
MSTRG.21562.2	NW_011952199.1	502705	503660	-	ncbi_105387816	512120	517357	-	DOWNSTREAM	8459	LOC105387816	leucine-rich repeat-containing protein 49-like	-	-	-	-	-	-	-
MSTRG.21562.2	NW_011952199.1	502705	503660	-	ncbi_105387815	506462	508407	-	DOWNSTREAM	2801	LOC105387815	zinc finger protein 180-like	-	-	-	-	-	-	-
MSTRG.21602.1	NW_011952200.1	456425	457991	-	ncbi_105387832	464656	474910	+	UPSTREAM	6664	LOC105387832	excitatory amino acid transporter	-	-	-	-	GO:0031224//intrinsic component of membrane	GO:0005310//dicarboxylic acid transmembrane transporter activity;GO:0015291//secondary active transmembrane transporter activity	GO:0044763//single-organism cellular process;GO:0046942//carboxylic acid transport
MSTRG.21602.1	NW_011952200.1	456425	457991	-	ncbi_105387831	437650	447786	-	UPSTREAM	8638	LOC105387831	nose resistant to fluoxetine protein 6-like	-	-	-	-	-	-	-
MSTRG.21604.1	NW_011952200.1	467244	467701	+	ncbi_105387834	477105	503481	-	DOWNSTREAM	9403	LOC105387834	protein dachsous-like	Environmental Information Processing	Signal transduction	ko04391//Hippo signaling pathway -fly	K16507	GO:0016020//membrane	-	-
XR_960786.1	NW_011952201.1	112496	117617	-	ncbi_105387852	103974	111964	-	UPSTREAM	531	LOC105387852	SPARC	-	-	-	-	GO:0044421//extracellular region part	-	-
XR_960786.1	NW_011952201.1	112496	117617	-	ncbi_105387873	122309	128796	+	UPSTREAM	4691	LOC105387873	solute carrier family 2	-	-	-	-	GO:0031224//intrinsic component of membrane	GO:0022857//transmembrane transporter activity	GO:0044763//single-organism cellular process;GO:0044765//single-organism transport
MSTRG.21777.2	NW_011952203.1	344186	344685	-	ncbi_105387923	336848	339089	-	UPSTREAM	5096	LOC105387923	methionyl-tRNA formyltransferase	Genetic Information Processing;Metabolism	Translation;Metabolism of cofactors and vitamins	ko00970//Aminoacyl-tRNA biosynthesis;ko00670//One carbon pool by folate	K00604;K00604	-	-	-
XR_960790.1	NW_011952203.1	344186	344685	-	ncbi_105387923	336848	339089	-	UPSTREAM	5096	LOC105387923	methionyl-tRNA formyltransferase	Genetic Information Processing;Metabolism	Translation;Metabolism of cofactors and vitamins	ko00970//Aminoacyl-tRNA biosynthesis;ko00670//One carbon pool by folate	K00604;K00604	-	-	-
MSTRG.21841.1	NW_011952204.1	130087	133451	+	ncbi_105387946	123354	129639	+	DOWNSTREAM	447	LOC105387946	putative phosphatidate phosphatase	Metabolism;Metabolism;Metabolism;Metabolism;Metabolism;Metabolism	Global and overview maps;Global and overview maps;Lipid metabolism;Lipid metabolism;Lipid metabolism;Lipid metabolism	ko01100//Metabolic pathways;ko01110//Biosynthesis of secondary metabolites;ko00564//Glycerophospholipid metabolism;ko00561//Glycerolipid metabolism;ko00600//Sphingolipid metabolism;ko00565//Ether lipid metabolism	K01080;K01080;K01080;K01080;K01080;K01080	-	-	-
MSTRG.21841.1	NW_011952204.1	130087	133451	+	ncbi_105387947	137421	148533	+	UPSTREAM	3969	LOC105387947	putative phosphatidate phosphatase	Metabolism;Metabolism;Metabolism;Metabolism;Metabolism;Metabolism	Global and overview maps;Global and overview maps;Lipid metabolism;Lipid metabolism;Lipid metabolism;Lipid metabolism	ko01100//Metabolic pathways;ko01110//Biosynthesis of secondary metabolites;ko00564//Glycerophospholipid metabolism;ko00561//Glycerolipid metabolism;ko00600//Sphingolipid metabolism;ko00565//Ether lipid metabolism	K01080;K01080;K01080;K01080;K01080;K01080	-	-	-
MSTRG.21843.1	NW_011952204.1	139260	157436	-	ncbi_105387946	123354	129639	+	DOWNSTREAM	9620	LOC105387946	putative phosphatidate phosphatase	Metabolism;Metabolism;Metabolism;Metabolism;Metabolism;Metabolism	Global and overview maps;Global and overview maps;Lipid metabolism;Lipid metabolism;Lipid metabolism;Lipid metabolism	ko01100//Metabolic pathways;ko01110//Biosynthesis of secondary metabolites;ko00564//Glycerophospholipid metabolism;ko00561//Glycerolipid metabolism;ko00600//Sphingolipid metabolism;ko00565//Ether lipid metabolism	K01080;K01080;K01080;K01080;K01080;K01080	-	-	-
MSTRG.21844.1	NW_011952204.1	144672	145522	-	ncbi_105387961	150634	202502	+	UPSTREAM	5111	LOC105387961	uncharacterized LOC105387961	-	-	-	-	-	GO:0043169//cation binding	-
MSTRG.21982.1	NW_011952206.1	127141	128389	-	ncbi_105388034	112745	125606	-	UPSTREAM	1534	LOC105388034	dynein heavy chain 12	-	-	-	-	-	-	-
MSTRG.21982.1	NW_011952206.1	127141	128389	-	ncbi_105388033	129291	134595	-	DOWNSTREAM	901	LOC105388033	transmembrane protein 110-like	-	-	-	-	-	-	-
MSTRG.22124.1	NW_011952208.1	286301	287259	-	MSTRG.22125	292309	293542	+	UPSTREAM	5049	--	mucin-19-like isoform X2 [Hyposmocoma kahamanoa]	-	-	-	-	-	-	-
MSTRG.22124.1	NW_011952208.1	286301	287259	-	ncbi_105388110	296741	326275	-	DOWNSTREAM	9481	LOC105388110	protein gooseberry-neuro	-	-	-	-	-	-	-
MSTRG.22373.2	NW_011952212.1	323701	324651	-	ncbi_105388235	309154	314008	+	DOWNSTREAM	9692	LOC105388235	uncharacterized LOC105388235	-	-	-	-	-	-	-
MSTRG.22383.1	NW_011952212.1	424247	425908	-	ncbi_105388237	414755	423984	+	DOWNSTREAM	262	LOC105388237	desmoplakin-like	-	-	-	-	-	-	-
MSTRG.22426.1	NW_011952213.1	453275	454022	+	ncbi_105388243	454029	455738	-	DOWNSTREAM	6	LOC105388243	alkylated DNA repair protein alkB homolog 1	-	-	-	-	-	-	-
MSTRG.22426.1	NW_011952213.1	453275	454022	+	ncbi_105388244	455913	456874	+	UPSTREAM	1890	LOC105388244	N-alpha-acetyltransferase 38-B	-	-	-	-	-	-	-
MSTRG.22597.1	NW_011952216.1	270126	274665	-	ncbi_105388331	262164	263175	-	UPSTREAM	6950	LOC105388331	U7 snRNA-associated Sm-like protein LSm10	-	-	-	-	-	-	-
MSTRG.22597.1	NW_011952216.1	270126	274665	-	ncbi_105388341	262969	263367	-	UPSTREAM	6758	LOC105388341	uncharacterized LOC105388341	-	-	-	-	-	-	-
MSTRG.22597.1	NW_011952216.1	270126	274665	-	ncbi_105388332	263723	266181	+	DOWNSTREAM	3944	LOC105388332	very-long-chain (3R)-3-hydroxyacyl-CoA dehydratase hpo-8	Metabolism;Metabolism;Metabolism;Metabolism	Global and overview maps;Global and overview maps;Lipid metabolism;Lipid metabolism	ko01110//Biosynthesis of secondary metabolites;ko01212//Fatty acid metabolism;ko00062//Fatty acid elongation;ko01040//Biosynthesis of unsaturated fatty acids	K10703;K10703;K10703;K10703	-	-	-
MSTRG.22597.1	NW_011952216.1	270126	274665	-	ncbi_105388334	266452	268811	+	DOWNSTREAM	1314	LOC105388334	bystin	-	-	-	-	-	-	-
MSTRG.22597.1	NW_011952216.1	270126	274665	-	ncbi_105388333	268763	269338	-	UPSTREAM	787	LOC105388333	E3 ubiquitin-protein ligase RNF180-like	-	-	-	-	-	-	-
MSTRG.22765.2	NW_011952219.1	575000	575695	+	ncbi_105388380	583415	591134	+	UPSTREAM	7719	LOC105388380	organic cation transporter protein-like	-	-	-	-	-	-	-
MSTRG.22783.1	NW_011952220.1	104727	389576	-	ncbi_105388418	394470	395990	+	UPSTREAM	4893	LOC105388418	tRNA (guanine(37)-N1)-methyltransferase-like	-	-	-	-	-	-	-
MSTRG.22783.1	NW_011952220.1	104727	389576	-	ncbi_105388397	77752	101370	+	DOWNSTREAM	3356	LOC105388397	contactin-associated protein-like 4	-	-	-	-	-	-	-
MSTRG.22783.1	NW_011952220.1	104727	389576	-	ncbi_105388416	391301	393927	-	DOWNSTREAM	1724	LOC105388416	BRCA1-A complex subunit BRE-like	-	-	-	-	-	-	-
MSTRG.22808.1	NW_011952220.1	365587	368319	+	ncbi_105388410	368845	369796	-	DOWNSTREAM	525	LOC105388410	GPN-loop GTPase 2	-	-	-	-	-	-	-
MSTRG.22808.1	NW_011952220.1	365587	368319	+	ncbi_105388413	370837	373714	+	UPSTREAM	2517	LOC105388413	ribosome biogenesis protein BRX1 homolog	-	-	-	-	-	-	-
MSTRG.22890.2	NW_011952222.1	51736	52833	+	ncbi_105388476	53844	65571	+	UPSTREAM	1010	LOC105388476	uncharacterized LOC105388476	-	-	-	-	-	-	-
MSTRG.23075.1	NW_011952224.1	403946	405652	-	ncbi_105388556	410547	438621	-	DOWNSTREAM	4894	LOC105388556	aquaporin AQPAe.a	-	-	-	-	GO:0031224//intrinsic component of membrane	-	GO:0051234//establishment of localization
MSTRG.23251.1	NW_011952227.1	240475	244547	-	ncbi_105388666	246176	248346	-	DOWNSTREAM	1628	LOC105388666	heat shock protein 68-like	Cellular Processes;Genetic Information Processing;Genetic Information Processing;Organismal Systems	Transport and catabolism;Folding, sorting and degradation;Transcription;Aging	ko04144//Endocytosis;ko04141//Protein processing in endoplasmic reticulum;ko03040//Spliceosome;ko04213//Longevity regulating pathway - multiple species	K03283;K03283;K03283;K03283	-	GO:0032550//purine ribonucleoside binding	-
MSTRG.23251.1	NW_011952227.1	240475	244547	-	ncbi_105388664	226910	238580	+	DOWNSTREAM	1894	LOC105388664	facilitated trehalose transporter Tret1-like	-	-	-	-	-	-	-
MSTRG.23401.2	NW_011952230.1	250572	252453	-	ncbi_105388737	257810	261245	-	DOWNSTREAM	5356	LOC105388737	uncharacterized LOC105388737	-	-	-	-	-	-	-
MSTRG.23423.3	NW_011952230.1	418677	424359	-	ncbi_105388744	413054	414233	-	UPSTREAM	4443	LOC105388744	uncharacterized LOC105388744	-	-	-	-	-	-	-
MSTRG.23423.3	NW_011952230.1	418677	424359	-	ncbi_105388750	434049	436488	-	DOWNSTREAM	9689	LOC105388750	zinc finger protein 107-like	-	-	-	-	-	-	-
MSTRG.23423.3	NW_011952230.1	418677	424359	-	ncbi_105388742	408275	410794	-	UPSTREAM	7882	LOC105388742	uncharacterized LOC105388742	-	-	-	-	-	-	-
MSTRG.23447.1	NW_011952231.1	64424	64891	+	ncbi_105388793	70432	80279	-	DOWNSTREAM	5540	LOC105388793	PC4 and SFRS1-interacting protein	-	-	-	-	-	-	-
MSTRG.23455.1	NW_011952231.1	122708	128133	+	ncbi_105388767	132560	144022	-	DOWNSTREAM	4426	LOC105388767	uncharacterized LOC105388767	-	-	-	-	-	-	-
MSTRG.23455.1	NW_011952231.1	122708	128133	+	ncbi_105388794	80482	122593	+	DOWNSTREAM	114	LOC105388794	uncharacterized LOC105388794	Metabolism;Cellular Processes;Environmental Information Processing;Metabolism	Global and overview maps;Transport and catabolism;Signal transduction;Carbohydrate metabolism	ko01100//Metabolic pathways;ko04144//Endocytosis;ko04070//Phosphatidylinositol signaling system;ko00562//Inositol phosphate metabolism	K00889;K00889;K00889;K00889	-	-	-
MSTRG.23498.2	NW_011952231.1	500775	503784	+	ncbi_105388799	491191	496474	+	DOWNSTREAM	4300	LOC105388799	uncharacterized LOC105388799	-	-	-	-	-	-	-
MSTRG.23498.2	NW_011952231.1	500775	503784	+	ncbi_105388787	507803	516760	+	UPSTREAM	4018	LOC105388787	cytochrome P450 4d2-like	-	-	-	-	-	-	-
MSTRG.23561.1	NW_011952233.1	2333	5526	+	ncbi_105388835	6014	8998	+	UPSTREAM	487	LOC105388835	DNA repair protein REV1-like	Genetic Information Processing	Replication and repair	ko03460//Fanconi anemia pathway	K03515	-	-	-
XR_960827.1	NW_011952234.1	58246	61410	-	ncbi_105388864	67709	90912	-	DOWNSTREAM	6298	LOC105388864	cilia- and flagella-associated protein 58-like	-	-	-	-	-	-	-
MSTRG.23656.1	NW_011952234.1	416174	418491	-	ncbi_105388887	425967	444609	+	UPSTREAM	7475	LOC105388887	mediator of RNA polymerase II transcription subunit 25-like	-	-	-	-	-	-	-
MSTRG.23656.1	NW_011952234.1	416174	418491	-	ncbi_105388885	387661	409272	-	UPSTREAM	6901	LOC105388885	UPF0183 protein CG7083	-	-	-	-	-	-	-
MSTRG.23666.1	NW_011952234.1	489146	489788	+	ncbi_105388888	485286	488142	-	UPSTREAM	1003	LOC105388888	antifreeze protein Maxi-like	-	-	-	-	-	-	-
MSTRG.23688.1	NW_011952235.1	126504	127758	-	ncbi_105388910	105898	123036	-	UPSTREAM	3467	LOC105388910	probable ubiquitin carboxyl-terminal hydrolase creB	Genetic Information Processing	Replication and repair	ko03460//Fanconi anemia pathway	K11832	-	-	-
MSTRG.23744.3	NW_011952236.1	246515	247997	-	ncbi_105388918	249058	269559	-	DOWNSTREAM	1060	LOC105388918	long-chain fatty acid transport protein 4-like	-	-	-	-	-	-	-
MSTRG.23859.1	NW_011952238.1	244710	245662	+	MSTRG.23861	249937	257152	+	UPSTREAM	4274	RE2	Retrovirus-related Pol polyprotein from transposon TNT 1-94 [Papilio machaon]	-	-	-	-	-	-	-
MSTRG.23859.1	NW_011952238.1	244710	245662	+	MSTRG.23864	252628	257872	+	UPSTREAM	6965	GIP	retrotransposon ty1-copia subclass [Lasius niger]	-	-	-	-	-	GO:0046914//transition metal ion binding	GO:0006259//DNA metabolic process
XR_960830.1	NW_011952238.1	284202	285796	+	ncbi_105388973	269480	274526	+	DOWNSTREAM	9675	LOC105388973	uncharacterized LOC105388973	-	-	-	-	-	-	-
MSTRG.23925.1	NW_011952239.1	283838	285593	+	ncbi_105389011	282018	283806	-	UPSTREAM	31	LOC105389011	uncharacterized LOC105389011	-	-	-	-	-	-	-
MSTRG.23942.1	NW_011952239.1	480572	486005	-	ncbi_105389015	486126	542734	-	DOWNSTREAM	120	LOC105389015	uncharacterized LOC105389015	-	-	-	-	-	-	-
MSTRG.24035.2	NW_011952241.1	403751	408355	-	ncbi_105389052	408890	422974	+	UPSTREAM	534	LOC105389052	protein SON-like	-	-	-	-	-	-	-
MSTRG.24041.2	NW_011952241.1	437633	438647	+	ncbi_105389055	432803	436575	+	DOWNSTREAM	1057	LOC105389055	delta(14)-sterol reductase-like	-	-	-	-	-	-	-
MSTRG.24041.2	NW_011952241.1	437633	438647	+	ncbi_105389054	425679	431554	+	DOWNSTREAM	6078	LOC105389054	probable phospholipid hydroperoxide glutathione peroxidase	Metabolism;Metabolism	Metabolism of other amino acids;Lipid metabolism	ko00480//Glutathione metabolism;ko00590//Arachidonic acid metabolism	K00432;K00432	-	GO:0004601//peroxidase activity	GO:0006950//response to stress;GO:0044710//single-organism metabolic process
MSTRG.24122.1	NW_011952243.1	76830	78726	-	ncbi_105389099	37986	70334	+	DOWNSTREAM	6495	LOC105389099	lysosome membrane protein 2-like	-	-	-	-	-	-	-
MSTRG.24122.1	NW_011952243.1	76830	78726	-	ncbi_105389100	79385	92797	-	DOWNSTREAM	658	LOC105389100	sphingolipid delta(4)-desaturase DES1	Metabolism;Metabolism	Global and overview maps;Lipid metabolism	ko01100//Metabolic pathways;ko00600//Sphingolipid metabolism	K04712;K04712	-	-	-
XR_960841.1	NW_011952243.1	298610	308056	-	ncbi_105389107	313415	315888	+	UPSTREAM	5358	LOC105389107	lipoprotein lipase-like	-	-	-	-	-	-	-
MSTRG.24148.1	NW_011952243.1	350388	351109	+	MSTRG.24147	341380	342260	+	DOWNSTREAM	8127	--	PREDICTED: CYC02 protein-like [Plutella xylostella]	-	-	-	-	-	-	-
MSTRG.24169.2	NW_011952243.1	517480	534422	-	ncbi_105389118	536334	538507	-	DOWNSTREAM	1911	LOC105389118	probable arginine--tRNA ligase	Genetic Information Processing	Translation	ko00970//Aminoacyl-tRNA biosynthesis	K01887	-	-	-
MSTRG.24169.2	NW_011952243.1	517480	534422	-	ncbi_105389115	501058	511562	-	UPSTREAM	5917	LOC105389115	GDP-fucose transporter 1-like	-	-	-	-	-	-	-
MSTRG.24210.1	NW_011952245.1	239336	252635	+	ncbi_105389187	254395	303861	-	DOWNSTREAM	1759	LOC105389187	uncharacterized LOC105389187	-	-	-	-	-	-	-
MSTRG.24225.1	NW_011952245.1	384506	386479	-	ncbi_105389158	378955	382537	-	UPSTREAM	1968	LOC105389158	spidroin-2-like	-	-	-	-	-	-	-
XR_960843.1	NW_011952245.1	408905	417292	+	ncbi_105389159	402137	408777	-	UPSTREAM	127	LOC105389159	uncharacterized LOC105389159	-	-	-	-	-	-	-
XR_960843.1	NW_011952245.1	408905	417292	+	ncbi_105389189	417392	424318	+	UPSTREAM	99	LOC105389189	sphingomyelin phosphodiesterase	Metabolism;Cellular Processes;Metabolism	Global and overview maps;Transport and catabolism;Lipid metabolism	ko01100//Metabolic pathways;ko04142//Lysosome;ko00600//Sphingolipid metabolism	K12350;K12350;K12350	-	-	-
XR_960843.1	NW_011952245.1	408905	417292	+	ncbi_105389161	424946	427912	-	DOWNSTREAM	7653	LOC105389161	uncharacterized LOC105389161	-	-	-	-	-	-	-
MSTRG.24297.1	NW_011952246.1	511585	515680	+	ncbi_105389213	515985	518738	-	DOWNSTREAM	304	LOC105389213	catalase-like	Metabolism;Metabolism;Metabolism;Cellular Processes;Environmental Information Processing;Organismal Systems;Metabolism;Metabolism	Global and overview maps;Global and overview maps;Global and overview maps;Transport and catabolism;Signal transduction;Aging;Carbohydrate metabolism;Amino acid metabolism	ko01110//Biosynthesis of secondary metabolites;ko01130//Biosynthesis of antibiotics;ko01200//Carbon metabolism;ko04146//Peroxisome;ko04068//FoxO signaling pathway;ko04213//Longevity regulating pathway - multiple species;ko00630//Glyoxylate and dicarboxylate metabolism;ko00380//Tryptophan metabolism	K03781;K03781;K03781;K03781;K03781;K03781;K03781;K03781	-	-	-
MSTRG.24297.1	NW_011952246.1	511585	515680	+	ncbi_105389203	498752	511110	-	UPSTREAM	474	LOC105389203	dnaJ homolog dnj-5-like	-	-	-	-	-	-	-
MSTRG.24314.1	NW_011952247.1	114063	114710	-	ncbi_105389232	97017	109248	-	UPSTREAM	4814	LOC105389232	27 kDa glycoprotein-like	-	-	-	-	-	-	-
MSTRG.24314.1	NW_011952247.1	114063	114710	-	ncbi_105389222	117153	164837	-	DOWNSTREAM	2442	LOC105389222	calcyphosin-like protein	-	-	-	-	-	-	-
MSTRG.24477.1	NW_011952250.1	246354	247365	-	ncbi_105389292	238399	242851	-	UPSTREAM	3502	LOC105389292	nucleoside diphosphate kinase 7-like	Metabolism;Metabolism;Metabolism;Metabolism;Metabolism	Global and overview maps;Global and overview maps;Global and overview maps;Nucleotide metabolism;Nucleotide metabolism	ko01100//Metabolic pathways;ko01110//Biosynthesis of secondary metabolites;ko01130//Biosynthesis of antibiotics;ko00230//Purine metabolism;ko00240//Pyrimidine metabolism	K00940;K00940;K00940;K00940;K00940	-	-	-
MSTRG.24477.1	NW_011952250.1	246354	247365	-	ncbi_105389295	249226	252316	+	UPSTREAM	1860	LOC105389295	DNA-directed RNA polymerases I	Metabolism;Metabolism;Metabolism;Genetic Information Processing	Global and overview maps;Nucleotide metabolism;Nucleotide metabolism;Transcription	ko01100//Metabolic pathways;ko00230//Purine metabolism;ko00240//Pyrimidine metabolism;ko03020//RNA polymerase	K03009;K03009;K03009;K03009	-	GO:0034062//RNA polymerase activity	GO:0034645//cellular macromolecule biosynthetic process
MSTRG.24638.3	NW_011952253.1	408782	424293	-	MSTRG.24637	395046	400995	+	DOWNSTREAM	7786	Slc7a1	Low affinity cationic amino acid transporter 2 [Papilio machaon]	-	-	-	-	GO:0016020//membrane	GO:0015171//amino acid transmembrane transporter activity	GO:0006865//amino acid transport;GO:0031348//negative regulation of defense response;GO:0042742//defense response to bacterium;GO:0044238//primary metabolic process;GO:0044763//single-organism cellular process
MSTRG.24638.4	NW_011952253.1	408782	424293	-	MSTRG.24637	395046	400995	+	DOWNSTREAM	7786	Slc7a1	Low affinity cationic amino acid transporter 2 [Papilio machaon]	-	-	-	-	GO:0016020//membrane	GO:0015171//amino acid transmembrane transporter activity	GO:0006865//amino acid transport;GO:0031348//negative regulation of defense response;GO:0042742//defense response to bacterium;GO:0044238//primary metabolic process;GO:0044763//single-organism cellular process
MSTRG.24719.1	NW_011952255.1	212201	214115	-	ncbi_105389409	215402	225198	+	UPSTREAM	1286	LOC105389409	monocarboxylate transporter 12	-	-	-	-	-	-	-
MSTRG.24923.1	NW_011952259.1	478389	478863	+	ncbi_105389513	471529	474166	+	DOWNSTREAM	4222	LOC105389513	apoptosis inhibitor 5-like	-	-	-	-	-	-	-
MSTRG.24933.1	NW_011952260.1	16330	48092	+	ncbi_105389525	8925	14197	-	UPSTREAM	2132	LOC105389525	alpha-2-macroglobulin receptor-associated protein-like	-	-	-	-	-	-	-
MSTRG.25350.1	NW_011952268.1	312893	313433	+	ncbi_105389727	320403	332340	-	DOWNSTREAM	6969	LOC105389727	maestro heat-like repeat-containing protein family member 1	-	-	-	-	-	-	-
MSTRG.25355.1	NW_011952268.1	342079	343411	+	ncbi_105389727	320403	332340	-	UPSTREAM	9738	LOC105389727	maestro heat-like repeat-containing protein family member 1	-	-	-	-	-	-	-
MSTRG.25393.1	NW_011952269.1	316907	319716	+	ncbi_105389749	312693	314916	+	DOWNSTREAM	1990	LOC105389749	carboxypeptidase N subunit 2-like	-	-	-	-	-	-	-
MSTRG.25429.1	NW_011952270.1	184108	187137	+	ncbi_105389792	144731	183070	+	DOWNSTREAM	1037	LOC105389792	oxysterol-binding protein-related protein 3-like	-	-	-	-	-	-	-
MSTRG.25451.1	NW_011952270.1	333613	334243	-	MSTRG.25449	328086	329909	-	UPSTREAM	3703	--	RING-type domain-containing protein [Aphis craccivora]	-	-	-	-	-	-	-
MSTRG.25451.1	NW_011952270.1	333613	334243	-	ncbi_105389788	335838	403367	-	DOWNSTREAM	1594	LOC105389788	glutamate receptor 1-like	Environmental Information Processing	Signaling molecules and interaction	ko04080//Neuroactive ligand-receptor interaction	K05199	GO:0016020//membrane	-	GO:0006810//transport;GO:0044699//single-organism process
MSTRG.25462.1	NW_011952270.1	472962	478946	-	ncbi_105389789	468233	468973	+	DOWNSTREAM	3988	LOC105389789	uncharacterized LOC105389789	-	-	-	-	-	-	-
MSTRG.25691.1	NW_011952275.1	351638	352605	+	ncbi_105389913	344121	350581	+	DOWNSTREAM	1056	LOC105389913	uncharacterized LOC105389913	-	-	-	-	-	-	-
XR_960871.1	NW_011952275.1	353559	359537	-	ncbi_105389913	344121	350581	+	DOWNSTREAM	2977	LOC105389913	uncharacterized LOC105389913	-	-	-	-	-	-	-
XR_960871.1	NW_011952275.1	353559	359537	-	ncbi_105389915	366495	373926	-	DOWNSTREAM	6957	LOC105389915	uncharacterized LOC105389915	-	-	-	-	-	-	-
MSTRG.25790.1	NW_011952278.1	54408	54765	+	ncbi_105389954	4075	46794	+	DOWNSTREAM	7613	LOC105389954	multidrug resistance-associated protein 4-like	-	-	-	-	-	-	-
MSTRG.25790.1	NW_011952278.1	54408	54765	+	ncbi_105389966	47570	52365	+	DOWNSTREAM	2042	LOC105389966	AP-3 complex subunit delta-like	Cellular Processes	Transport and catabolism	ko04142//Lysosome	K12396	-	-	-
MSTRG.25807.1	NW_011952278.1	255687	259679	+	ncbi_105389956	254584	255100	-	UPSTREAM	586	LOC105389956	uncharacterized LOC105389956	-	-	-	-	-	-	-
MSTRG.25818.1	NW_011952278.1	321289	322962	-	ncbi_105389959	318301	320293	+	DOWNSTREAM	995	LOC105389959	GDP-fucose protein O-fucosyltransferase 2	Metabolism	Glycan biosynthesis and metabolism	ko00514//Other types of O-glycan biosynthesis	K03691	-	GO:0016740//transferase activity	-
MSTRG.25824.1	NW_011952278.1	405017	478492	+	ncbi_105389978	481409	482863	-	DOWNSTREAM	2916	LOC105389978	extracellular exo-inulinase inuE-like	-	-	-	-	-	-	-
MSTRG.25838.1	NW_011952279.1	113404	115749	+	MSTRG.25837	101023	103539	-	UPSTREAM	9864	--	Cytadhesion, partial [Operophtera brumata]	-	-	-	-	-	-	-
MSTRG.25838.1	NW_011952279.1	113404	115749	+	ncbi_105389980	117996	122954	-	DOWNSTREAM	2246	LOC105389980	DNA ligase 3	Genetic Information Processing	Replication and repair	ko03410//Base excision repair	K10776	-	-	-
MSTRG.25846.1	NW_011952279.1	232802	246235	+	ncbi_105389988	128184	232030	+	DOWNSTREAM	771	LOC105389988	protocadherin-15	-	-	-	-	-	-	-
MSTRG.25847.5	NW_011952279.1	235146	235782	-	ncbi_105389988	128184	232030	+	DOWNSTREAM	3115	LOC105389988	protocadherin-15	-	-	-	-	-	-	-
MSTRG.25847.5	NW_011952279.1	235146	235782	-	ncbi_105389989	245565	263592	-	DOWNSTREAM	9782	LOC105389989	mucin-19-like	-	-	-	-	-	-	-
MSTRG.25917.1	NW_011952280.1	389530	393974	+	ncbi_105390021	382065	388609	+	DOWNSTREAM	920	LOC105390021	uncharacterized LOC105390021	-	-	-	-	-	-	-
MSTRG.25936.2	NW_011952281.1	90752	91692	+	ncbi_105390027	74240	82831	+	DOWNSTREAM	7920	LOC105390027	phosphoserine phosphatase	Metabolism;Metabolism;Metabolism;Metabolism;Metabolism;Metabolism	Global and overview maps;Global and overview maps;Global and overview maps;Global and overview maps;Global and overview maps;Amino acid metabolism	ko01100//Metabolic pathways;ko01130//Biosynthesis of antibiotics;ko01120//Microbial metabolism in diverse environments;ko01200//Carbon metabolism;ko01230//Biosynthesis of amino acids;ko00260//Glycine, serine and threonine metabolism	K01079;K01079;K01079;K01079;K01079;K01079	-	-	-
MSTRG.26029.1	NW_011952282.1	307290	309205	+	ncbi_105390091	281652	299209	+	DOWNSTREAM	8080	LOC105390091	histone acetyltransferase KAT7-like	-	-	-	-	-	GO:0016740//transferase activity	GO:0008152//metabolic process
MSTRG.26049.1	NW_011952283.1	8158	11400	-	ncbi_105390096	12922	20361	-	DOWNSTREAM	1521	LOC105390096	JNK-interacting protein 1	-	-	-	-	-	-	-
MSTRG.26053.1	NW_011952283.1	25813	27195	+	ncbi_105390096	12922	20361	-	UPSTREAM	5451	LOC105390096	JNK-interacting protein 1	-	-	-	-	-	-	-
MSTRG.26115.2	NW_011952284.1	127189	128547	-	ncbi_105390133	124436	125711	-	UPSTREAM	1477	LOC105390133	uncharacterized LOC105390133	Environmental Information Processing	Signaling molecules and interaction	ko04080//Neuroactive ligand-receptor interaction	K01312	-	-	-
MSTRG.26115.2	NW_011952284.1	127189	128547	-	ncbi_105390145	111795	121797	-	UPSTREAM	5391	LOC105390145	ATP-binding cassette sub-family F member 1-like	-	-	-	-	-	-	-
MSTRG.26238.1	NW_011952287.1	166073	206695	+	ncbi_105390184	142817	161944	+	DOWNSTREAM	4128	LOC105390184	uncharacterized LOC105390184	-	-	-	-	-	-	-
MSTRG.26293.1	NW_011952288.1	274149	275447	+	ncbi_105390226	276426	278079	+	UPSTREAM	978	LOC105390226	1	Metabolism;Metabolism	Global and overview maps;Amino acid metabolism	ko01100//Metabolic pathways;ko00270//Cysteine and methionine metabolism	K08967;K08967	-	-	-
MSTRG.26293.1	NW_011952288.1	274149	275447	+	ncbi_105390214	282449	283186	+	UPSTREAM	7001	LOC105390214	uncharacterized LOC105390214	-	-	-	-	-	-	-
MSTRG.26293.1	NW_011952288.1	274149	275447	+	MSTRG.26298	283511	300048	+	UPSTREAM	8063	--	salivary glue protein Sgs-3-like, partial [Salmo trutta]	-	-	-	-	-	-	-
MSTRG.26300.1	NW_011952288.1	303261	304617	-	MSTRG.26298	283511	300048	+	DOWNSTREAM	3212	--	salivary glue protein Sgs-3-like, partial [Salmo trutta]	-	-	-	-	-	-	-
MSTRG.26330.1	NW_011952289.1	5914	7527	+	ncbi_105390231	10813	11462	+	UPSTREAM	3285	LOC105390231	transcription factor MafK-like	-	-	-	-	-	-	-
MSTRG.26330.1	NW_011952289.1	5914	7527	+	ncbi_105390246	16234	20706	+	UPSTREAM	8706	LOC105390246	23 kDa integral membrane protein-like	-	-	-	-	-	-	-
XR_960882.1	NW_011952289.1	51887	54367	+	ncbi_105390233	62007	64357	+	UPSTREAM	7639	LOC105390233	uncharacterized LOC105390233	-	-	-	-	-	-	-
MSTRG.26405.1	NW_011952290.1	317685	326487	-	ncbi_105390259	328636	358215	+	UPSTREAM	2148	LOC105390259	uncharacterized LOC105390259	-	-	-	-	-	-	-
MSTRG.26506.1	NW_011952293.1	151059	153396	-	ncbi_105390311	139230	147755	+	DOWNSTREAM	3303	LOC105390311	xaa-Pro dipeptidase-like	-	-	-	-	-	-	-
XR_960887.1	NW_011952294.1	272690	356037	+	ncbi_105390333	356081	386833	+	UPSTREAM	43	LOC105390333	diuretic hormone receptor	Environmental Information Processing	Signaling molecules and interaction	ko04080//Neuroactive ligand-receptor interaction	K04578	-	-	-
MSTRG.26704.2	NW_011952297.1	390944	392444	+	ncbi_105390402	380440	385960	+	DOWNSTREAM	4983	LOC105390402	uncharacterized LOC105390402	-	-	-	-	-	-	-
MSTRG.26704.2	NW_011952297.1	390944	392444	+	ncbi_105390393	396971	408464	+	UPSTREAM	4526	LOC105390393	aldo-keto reductase AKR2E4-like	Metabolism;Metabolism;Metabolism;Metabolism;Metabolism	Global and overview maps;Carbohydrate metabolism;Carbohydrate metabolism;Lipid metabolism;Carbohydrate metabolism	ko01100//Metabolic pathways;ko00040//Pentose and glucuronate interconversions;ko00052//Galactose metabolism;ko00561//Glycerolipid metabolism;ko00051//Fructose and mannose metabolism	K00011;K00011;K00011;K00011;K00011	-	-	-
MSTRG.26711.1	NW_011952297.1	426475	427256	-	ncbi_105390392	406993	418003	-	UPSTREAM	8471	LOC105390392	protein quiver-like	-	-	-	-	-	-	-
MSTRG.26711.1	NW_011952297.1	426475	427256	-	ncbi_105390394	430690	442591	-	DOWNSTREAM	3433	LOC105390394	F-box/LRR-repeat protein 2	-	-	-	-	-	-	-
MSTRG.26891.1	NW_011952302.1	236873	237301	+	ncbi_105390526	219793	233500	-	UPSTREAM	3372	LOC105390526	gamma-2-syntrophin-like	-	-	-	-	-	-	-
MSTRG.26972.1	NW_011952304.1	220408	226169	+	ncbi_105390562	234357	235379	+	UPSTREAM	8187	LOC105390562	SAP domain-containing ribonucleoprotein	-	-	-	-	-	-	-
MSTRG.26972.1	NW_011952304.1	220408	226169	+	ncbi_105390580	196038	219735	+	DOWNSTREAM	672	LOC105390580	mediator of RNA polymerase II transcription subunit 1.1	-	-	-	-	-	-	-
MSTRG.27033.1	NW_011952305.1	324643	325188	+	ncbi_105390598	319461	320371	-	UPSTREAM	4271	LOC105390598	migration and invasion enhancer 1	-	-	-	-	-	-	-
MSTRG.27033.1	NW_011952305.1	324643	325188	+	ncbi_105390609	306933	316021	+	DOWNSTREAM	8621	LOC105390609	molybdenum cofactor sulfurase	-	-	-	-	-	GO:0003824//catalytic activity;GO:0043168//anion binding;GO:0046914//transition metal ion binding	GO:0009108//coenzyme biosynthetic process
MSTRG.27079.3	NW_011952306.1	306037	307961	+	ncbi_105390647	308352	317098	-	DOWNSTREAM	390	LOC105390647	stress response protein NST1-like	Metabolism;Metabolism	Global and overview maps;Amino acid metabolism	ko01100//Metabolic pathways;ko00280//Valine, leucine and isoleucine degradation	K05607;K05607	-	-	-
MSTRG.27136.1	NW_011952308.1	22155	22764	+	ncbi_105390678	7011	13010	+	DOWNSTREAM	9144	LOC105390678	trypsin CFT-1-like	-	-	-	-	-	-	-
MSTRG.27211.1	NW_011952309.1	249255	276647	-	ncbi_105390706	284074	288859	-	DOWNSTREAM	7426	LOC105390706	uncharacterized LOC105390706	-	-	-	-	-	-	-
MSTRG.27228.1	NW_011952309.1	384201	386378	+	ncbi_105390718	367016	381568	-	UPSTREAM	2632	LOC105390718	optineurin-like	-	-	-	-	-	-	-
MSTRG.27361.1	NW_011952312.1	411598	418850	+	ncbi_105390772	395807	409897	-	UPSTREAM	1700	LOC105390772	nuclear pore complex protein Nup98-Nup96-like	Genetic Information Processing	Translation	ko03013//RNA transport	K14297	-	-	-
MSTRG.27361.2	NW_011952312.1	411598	418850	+	ncbi_105390772	395807	409897	-	UPSTREAM	1700	LOC105390772	nuclear pore complex protein Nup98-Nup96-like	Genetic Information Processing	Translation	ko03013//RNA transport	K14297	-	-	-
MSTRG.27391.2	NW_011952313.1	146435	147157	+	ncbi_105390782	139190	141247	+	DOWNSTREAM	5187	LOC105390782	zinc finger CCHC domain-containing protein 9-like	-	-	-	-	-	-	-
MSTRG.27510.1	NW_011952316.1	332889	348707	+	ncbi_105390865	321143	329112	+	DOWNSTREAM	3776	LOC105390865	cytochrome c oxidase subunit 4 isoform 1	Metabolism;Metabolism	Global and overview maps;Energy metabolism	ko01100//Metabolic pathways;ko00190//Oxidative phosphorylation	K02263;K02263	-	-	GO:0015992//proton transport
MSTRG.27525.1	NW_011952317.1	116322	139843	-	ncbi_105390874	105603	110012	-	UPSTREAM	6309	LOC105390874	solute carrier family 2	-	-	-	-	-	-	-
MSTRG.27537.1	NW_011952317.1	231443	232599	-	ncbi_105390882	196122	231283	-	UPSTREAM	159	LOC105390882	trithorax group protein osa	Genetic Information Processing	Replication and repair	ko03410//Base excision repair	K03649	-	-	-
MSTRG.27594.1	NW_011952319.1	221764	224574	+	ncbi_105390903	229914	243324	-	DOWNSTREAM	5339	LOC105390903	putative ATP-dependent RNA helicase DHX57	-	-	-	-	-	GO:0016787//hydrolase activity;GO:0043167//ion binding;GO:0097159//organic cyclic compound binding;GO:1901363//heterocyclic compound binding	-
MSTRG.27594.2	NW_011952319.1	221764	224574	+	ncbi_105390903	229914	243324	-	DOWNSTREAM	5339	LOC105390903	putative ATP-dependent RNA helicase DHX57	-	-	-	-	-	GO:0016787//hydrolase activity;GO:0043167//ion binding;GO:0097159//organic cyclic compound binding;GO:1901363//heterocyclic compound binding	-
MSTRG.27661.1	NW_011952321.1	1995	12441	-	ncbi_105390952	15203	18718	-	DOWNSTREAM	2761	LOC105390952	clavesin-1-like	-	-	-	-	-	-	-
MSTRG.27663.1	NW_011952321.1	19563	35148	-	ncbi_105390952	15203	18718	-	UPSTREAM	844	LOC105390952	clavesin-1-like	-	-	-	-	-	-	-
MSTRG.27663.1	NW_011952321.1	19563	35148	-	ncbi_105390935	41593	52575	+	UPSTREAM	6444	LOC105390935	clavesin-2-like	-	-	-	-	-	-	-
XR_960917.1	NW_011952321.1	217613	218280	+	ncbi_105390942	184814	214134	+	DOWNSTREAM	3478	LOC105390942	alpha-tocopherol transfer protein-like	-	-	-	-	-	-	-
MSTRG.27684.1	NW_011952321.1	217613	218502	+	ncbi_105390942	184814	214134	+	DOWNSTREAM	3478	LOC105390942	alpha-tocopherol transfer protein-like	-	-	-	-	-	-	-
MSTRG.27702.1	NW_011952322.1	22569	23664	+	ncbi_105390960	5348	14739	+	DOWNSTREAM	7829	LOC105390960	translation elongation factor 2-like	-	-	-	-	GO:0044424//intracellular part	GO:0008135//translation factor activity, RNA binding;GO:0017111//nucleoside-triphosphatase activity;GO:0032550//purine ribonucleoside binding	GO:0010467//gene expression;GO:0034645//cellular macromolecule biosynthetic process
MSTRG.27702.1	NW_011952322.1	22569	23664	+	ncbi_105390962	17356	19067	+	DOWNSTREAM	3501	LOC105390962	UMP-CMP kinase-like	Metabolism;Metabolism	Global and overview maps;Nucleotide metabolism	ko01100//Metabolic pathways;ko00240//Pyrimidine metabolism	K13800;K13800	GO:0043231//intracellular membrane-bounded organelle	GO:0016776//phosphotransferase activity, phosphate group as acceptor;GO:0019201//nucleotide kinase activity;GO:0032550//purine ribonucleoside binding	GO:0006220//pyrimidine nucleotide metabolic process;GO:0019856//pyrimidine nucleobase biosynthetic process
MSTRG.27728.1	NW_011952322.1	315760	316988	+	ncbi_105390972	326876	330590	-	DOWNSTREAM	9887	LOC105390972	chaoptin-like	-	-	-	-	-	-	-
MSTRG.27766.1	NW_011952323.1	170042	170931	+	ncbi_105390997	175464	177686	+	UPSTREAM	4532	LOC105390997	membrane alanyl aminopeptidase-like	Metabolism;Metabolism	Global and overview maps;Metabolism of other amino acids	ko01100//Metabolic pathways;ko00480//Glutathione metabolism	K11140;K11140	-	-	-
MSTRG.27766.1	NW_011952323.1	170042	170931	+	ncbi_105390988	180399	195642	+	UPSTREAM	9467	LOC105390988	membrane alanyl aminopeptidase-like	Metabolism;Metabolism	Global and overview maps;Metabolism of other amino acids	ko01100//Metabolic pathways;ko00480//Glutathione metabolism	K11140;K11140	-	GO:0046914//transition metal ion binding;GO:0070011//peptidase activity, acting on L-amino acid peptides	GO:0019538//protein metabolic process
MSTRG.27766.1	NW_011952323.1	170042	170931	+	ncbi_105390996	155209	168945	+	DOWNSTREAM	1096	LOC105390996	aminopeptidase N-like	Metabolism;Metabolism	Global and overview maps;Metabolism of other amino acids	ko01100//Metabolic pathways;ko00480//Glutathione metabolism	K11140;K11140	-	-	-
MSTRG.27829.1	NW_011952325.1	101412	103981	+	ncbi_105391046	109141	110372	-	DOWNSTREAM	5159	LOC105391046	uncharacterized LOC105391046	-	-	-	-	-	-	-
MSTRG.27829.1	NW_011952325.1	101412	103981	+	ncbi_105391047	111725	114536	+	UPSTREAM	7743	LOC105391047	uncharacterized LOC105391047	-	-	-	-	-	-	-
MSTRG.27831.1	NW_011952325.1	105721	107905	+	ncbi_105391046	109141	110372	-	DOWNSTREAM	1235	LOC105391046	uncharacterized LOC105391046	-	-	-	-	-	-	-
MSTRG.27831.1	NW_011952325.1	105721	107905	+	ncbi_105391047	111725	114536	+	UPSTREAM	3819	LOC105391047	uncharacterized LOC105391047	-	-	-	-	-	-	-
XR_960922.1	NW_011952325.1	110515	111124	+	ncbi_105391046	109141	110372	-	UPSTREAM	142	LOC105391046	uncharacterized LOC105391046	-	-	-	-	-	-	-
XR_960922.1	NW_011952325.1	110515	111124	+	ncbi_105391047	111725	114536	+	UPSTREAM	600	LOC105391047	uncharacterized LOC105391047	-	-	-	-	-	-	-
XR_960922.1	NW_011952325.1	110515	111124	+	ncbi_105391048	119237	142032	+	UPSTREAM	8112	LOC105391048	uncharacterized LOC105391048	-	-	-	-	-	-	-
MSTRG.27984.1	NW_011952328.1	305270	316955	+	ncbi_105391105	258152	295936	+	DOWNSTREAM	9333	LOC105391105	uncharacterized LOC105391105	-	-	-	-	-	-	-
MSTRG.28274.2	NW_011952335.1	290616	291921	+	ncbi_105391256	285140	289653	+	DOWNSTREAM	962	LOC105391256	uncharacterized LOC105391256	-	-	-	-	-	-	-
MSTRG.28274.2	NW_011952335.1	290616	291921	+	MSTRG.28276	299524	300535	+	UPSTREAM	7602	--	-	-	-	-	-	-	-	-
XR_960927.1	NW_011952336.1	393820	394419	-	ncbi_105391289	394899	395296	+	UPSTREAM	479	LOC105391289	uncharacterized LOC105391289	-	-	-	-	-	-	-
MSTRG.28457.2	NW_011952340.1	80153	83273	-	ncbi_105391366	89622	90413	+	UPSTREAM	6348	LOC105391366	uncharacterized LOC105391366	Genetic Information Processing	Replication and repair	ko03460//Fanconi anemia pathway	K15365	-	-	-
MSTRG.28457.2	NW_011952340.1	80153	83273	-	ncbi_105391367	90481	106435	-	DOWNSTREAM	7207	LOC105391367	peroxisomal multifunctional enzyme type 2-like	Metabolism;Cellular Processes	Global and overview maps;Transport and catabolism	ko01100//Metabolic pathways;ko04146//Peroxisome	K12405;K12405	-	-	-
MSTRG.28495.1	NW_011952341.1	143248	146550	-	ncbi_105391408	147589	151594	+	UPSTREAM	1038	LOC105391408	serine--tRNA ligase	Genetic Information Processing	Translation	ko00970//Aminoacyl-tRNA biosynthesis	K01875	-	-	-
MSTRG.28496.1	NW_011952341.1	143251	145491	+	ncbi_105391408	147589	151594	+	UPSTREAM	2097	LOC105391408	serine--tRNA ligase	Genetic Information Processing	Translation	ko00970//Aminoacyl-tRNA biosynthesis	K01875	-	-	-
MSTRG.28509.1	NW_011952341.1	181172	184753	+	ncbi_105391392	170896	172725	-	UPSTREAM	8446	LOC105391392	uncharacterized LOC105391392	-	-	-	-	-	-	-
MSTRG.28520.2	NW_011952341.1	289845	323617	-	ncbi_105391397	281509	284248	+	DOWNSTREAM	5596	LOC105391397	ninjurin-2-like	-	-	-	-	-	-	-
MSTRG.28567.1	NW_011952343.1	14662	15267	+	ncbi_105391443	22734	61733	+	UPSTREAM	7466	LOC105391443	midasin-like	Genetic Information Processing	Translation	ko03008//Ribosome biogenesis in eukaryotes	K14572	-	-	-
MSTRG.28578.1	NW_011952343.1	83645	91156	-	ncbi_105391431	72521	74277	+	DOWNSTREAM	9367	LOC105391431	ribonuclease kappa-B-like	-	-	-	-	-	-	-
MSTRG.28578.1	NW_011952343.1	83645	91156	-	ncbi_105391432	75810	78771	-	UPSTREAM	4873	LOC105391432	testis-specific serine/threonine-protein kinase 3	-	-	-	-	-	GO:0004674//protein serine/threonine kinase activity;GO:0032550//purine ribonucleoside binding	GO:0006464//cellular protein modification process;GO:0006796//phosphate-containing compound metabolic process
MSTRG.28578.1	NW_011952343.1	83645	91156	-	ncbi_105391434	91596	93866	-	DOWNSTREAM	439	LOC105391434	polyadenylate-binding protein 2-like	Genetic Information Processing	Translation	ko03015//mRNA surveillance pathway	K14396	-	GO:0097159//organic cyclic compound binding	-
MSTRG.28578.1	NW_011952343.1	83645	91156	-	ncbi_105391435	94101	102395	+	UPSTREAM	2944	LOC105391435	SAGA-associated factor 29 homolog	-	-	-	-	-	-	-
MSTRG.28643.1	NW_011952344.1	349089	356073	+	ncbi_105391460	360216	361230	-	DOWNSTREAM	4142	LOC105391460	uncharacterized LOC105391460	-	-	-	-	-	-	-
MSTRG.28645.1	NW_011952344.1	353476	354628	-	ncbi_105391459	355387	359542	-	DOWNSTREAM	758	LOC105391459	protein jagunal-like	-	-	-	-	-	-	-
MSTRG.28645.1	NW_011952344.1	353476	354628	-	ncbi_105391460	360216	361230	-	DOWNSTREAM	5587	LOC105391460	uncharacterized LOC105391460	-	-	-	-	-	-	-
MSTRG.28646.1	NW_011952344.1	353510	354406	+	ncbi_105391459	355387	359542	-	DOWNSTREAM	980	LOC105391459	protein jagunal-like	-	-	-	-	-	-	-
MSTRG.28646.1	NW_011952344.1	353510	354406	+	ncbi_105391460	360216	361230	-	DOWNSTREAM	5809	LOC105391460	uncharacterized LOC105391460	-	-	-	-	-	-	-
MSTRG.28775.2	NW_011952347.1	328432	330816	-	ncbi_105391538	330912	334445	-	DOWNSTREAM	95	LOC105391538	protein lifeguard 1-like	-	-	-	-	GO:0031224//intrinsic component of membrane	-	-
MSTRG.28775.3	NW_011952347.1	328435	330792	-	ncbi_105391538	330912	334445	-	DOWNSTREAM	119	LOC105391538	protein lifeguard 1-like	-	-	-	-	GO:0031224//intrinsic component of membrane	-	-
MSTRG.28794.1	NW_011952348.1	99801	101229	+	ncbi_105391550	81720	90205	-	UPSTREAM	9595	LOC105391550	vacuolar protein sorting-associated protein 72 homolog	-	-	-	-	-	-	-
MSTRG.28794.1	NW_011952348.1	99801	101229	+	ncbi_105391552	93306	98617	+	DOWNSTREAM	1183	LOC105391552	trans-Golgi network integral membrane protein 2-like	-	-	-	-	-	-	-
MSTRG.28823.1	NW_011952349.1	17518	23943	+	ncbi_105391561	33625	48024	-	DOWNSTREAM	9681	LOC105391561	rhomboid-related protein 2-like	-	-	-	-	-	-	-
MSTRG.28828.1	NW_011952349.1	75946	77508	-	ncbi_105391573	48454	67571	+	DOWNSTREAM	8374	LOC105391573	uncharacterized LOC105391573	-	-	-	-	-	-	-
MSTRG.28828.1	NW_011952349.1	75946	77508	-	ncbi_105391574	84361	102643	-	DOWNSTREAM	6852	LOC105391574	carboxypeptidase D-like	-	-	-	-	-	-	-
MSTRG.28841.6	NW_011952349.1	172285	174628	+	ncbi_105391568	149234	172123	+	DOWNSTREAM	161	LOC105391568	ceramide synthase 5	Metabolism;Metabolism	Global and overview maps;Lipid metabolism	ko01100//Metabolic pathways;ko00600//Sphingolipid metabolism	K04710;K04710	-	-	-
MSTRG.28878.1	NW_011952350.1	162695	266159	-	ncbi_105391599	275651	279541	+	UPSTREAM	9491	LOC105391599	uncharacterized LOC105391599	-	-	-	-	-	-	-
MSTRG.28927.3	NW_011952351.1	327479	329037	-	ncbi_105391612	329337	330884	+	UPSTREAM	299	LOC105391612	peroxiredoxin-like	-	-	-	-	-	GO:0003824//catalytic activity;GO:0016209//antioxidant activity	GO:0044710//single-organism metabolic process
MSTRG.28927.3	NW_011952351.1	327479	329037	-	ncbi_105391624	330572	337793	+	UPSTREAM	1534	LOC105391624	ubiquitin thioesterase OTU1-like	Genetic Information Processing	Folding, sorting and degradation	ko04141//Protein processing in endoplasmic reticulum	K13719	-	-	-
MSTRG.28972.1	NW_011952352.1	288716	291244	+	ncbi_105391637	269062	279431	-	UPSTREAM	9284	LOC105391637	splicing factor 3B subunit 2-like	Genetic Information Processing	Transcription	ko03040//Spliceosome	K12829	-	-	-
MSTRG.29011.1	NW_011952353.1	185434	186197	-	ncbi_105391660	191054	228656	+	UPSTREAM	4856	LOC105391660	kinesin-like protein Klp68D	-	-	-	-	-	-	-
MSTRG.29111.1	NW_011952356.1	5060	5651	-	ncbi_105391707	10187	13353	-	DOWNSTREAM	4535	LOC105391707	Golgi to ER traffic protein 4 homolog	-	-	-	-	-	-	-
MSTRG.29241.1	NW_011952359.1	201440	204184	+	ncbi_105391774	204545	211934	+	UPSTREAM	360	LOC105391774	probable serine/threonine-protein kinase DDB_G0282963	-	-	-	-	-	-	-
MSTRG.29245.1	NW_011952359.1	227956	229391	+	ncbi_105391775	232231	235747	+	UPSTREAM	2839	LOC105391775	WD repeat-containing protein 46	-	-	-	-	-	-	-
XR_960945.1	NW_011952362.1	70608	73311	-	ncbi_105391806	62479	65518	-	UPSTREAM	5089	LOC105391806	lysine--tRNA ligase	Genetic Information Processing	Translation	ko00970//Aminoacyl-tRNA biosynthesis	K04567	-	-	-
XR_960945.1	NW_011952362.1	70608	73311	-	ncbi_105391807	65705	70003	+	DOWNSTREAM	604	LOC105391807	protein Mo25	Environmental Information Processing	Signal transduction	ko04150//mTOR signaling pathway	K08272	-	-	-
MSTRG.29351.1	NW_011952362.1	214598	215933	+	ncbi_105391812	211344	214497	+	DOWNSTREAM	100	LOC105391812	uncharacterized LOC105391812	-	-	-	-	-	-	-
MSTRG.29387.1	NW_011952363.1	156927	165520	-	ncbi_105391833	147579	154469	-	UPSTREAM	2457	LOC105391833	uncharacterized LOC105391833	-	-	-	-	-	-	-
MSTRG.29387.1	NW_011952363.1	156927	165520	-	ncbi_105391824	169912	184743	+	UPSTREAM	4391	LOC105391824	uncharacterized LOC105391824	-	-	-	-	-	-	-
MSTRG.29454.1	NW_011952365.1	162624	164335	+	ncbi_105391858	168653	175617	-	DOWNSTREAM	4317	LOC105391858	uncharacterized LOC105391858	-	-	-	-	-	-	-
MSTRG.29454.1	NW_011952365.1	162624	164335	+	ncbi_105391857	125718	162593	+	DOWNSTREAM	30	LOC105391857	innexin inx1	-	-	-	-	GO:0031224//intrinsic component of membrane	-	GO:0044765//single-organism transport
MSTRG.29515.1	NW_011952367.1	239959	242363	+	ncbi_105391896	231812	232797	-	UPSTREAM	7161	LOC105391896	trypsin	Environmental Information Processing	Signaling molecules and interaction	ko04080//Neuroactive ligand-receptor interaction	K01312	-	-	-
MSTRG.29515.1	NW_011952367.1	239959	242363	+	ncbi_105391882	235343	239689	+	DOWNSTREAM	269	LOC105391882	trypsin CFT-1-like	Environmental Information Processing	Signaling molecules and interaction	ko04080//Neuroactive ligand-receptor interaction	K01312	-	-	-
MSTRG.29515.1	NW_011952367.1	239959	242363	+	ncbi_105391885	250820	260626	+	UPSTREAM	8456	LOC105391885	bifunctional purine biosynthesis protein PURH-like	Metabolism;Metabolism;Metabolism;Metabolism;Metabolism	Global and overview maps;Global and overview maps;Global and overview maps;Nucleotide metabolism;Metabolism of cofactors and vitamins	ko01100//Metabolic pathways;ko01110//Biosynthesis of secondary metabolites;ko01130//Biosynthesis of antibiotics;ko00230//Purine metabolism;ko00670//One carbon pool by folate	K00602;K00602;K00602;K00602;K00602	-	-	-
MSTRG.29515.1	NW_011952367.1	239959	242363	+	ncbi_105391880	224873	230157	-	UPSTREAM	9801	LOC105391880	cytochrome b5-like	-	-	-	-	-	-	-
MSTRG.29569.1	NW_011952369.1	64275	68025	+	ncbi_105391920	47977	57690	-	UPSTREAM	6584	LOC105391920	uncharacterized LOC105391920	-	-	-	-	-	-	-
MSTRG.29569.1	NW_011952369.1	64275	68025	+	ncbi_105391923	70512	177636	+	UPSTREAM	2486	LOC105391923	uncharacterized LOC105391923	-	-	-	-	-	-	-
MSTRG.29609.1	NW_011952370.1	115295	179164	+	ncbi_105391937	109369	111604	+	DOWNSTREAM	3690	LOC105391937	H/ACA ribonucleoprotein complex subunit 4-like	Genetic Information Processing	Translation	ko03008//Ribosome biogenesis in eukaryotes	K11131	GO:0032991//macromolecular complex;GO:0044423//virion part	GO:0003676//nucleic acid binding;GO:0016866//intramolecular transferase activity	GO:0010467//gene expression;GO:0016070//RNA metabolic process
MSTRG.29618.2	NW_011952370.1	212315	213531	+	ncbi_105391951	202676	211751	+	DOWNSTREAM	563	LOC105391951	UDP-glucuronosyltransferase 1-7C-like	Metabolism;Metabolism;Metabolism;Metabolism;Metabolism;Metabolism;Metabolism;Metabolism;Metabolism;Metabolism	Global and overview maps;Global and overview maps;Carbohydrate metabolism;Carbohydrate metabolism;Xenobiotics biodegradation and metabolism;Xenobiotics biodegradation and metabolism;Metabolism of cofactors and vitamins;Xenobiotics biodegradation and metabolism;Carbohydrate metabolism;Metabolism of cofactors and vitamins	ko01100//Metabolic pathways;ko01110//Biosynthesis of secondary metabolites;ko00500//Starch and sucrose metabolism;ko00040//Pentose and glucuronate interconversions;ko00983//Drug metabolism - other enzymes;ko00980//Metabolism of xenobiotics by cytochrome P450;ko00860//Porphyrin and chlorophyll metabolism;ko00982//Drug metabolism - cytochrome P450;ko00053//Ascorbate and aldarate metabolism;ko00830/…	K00699;K00699;K00699;K00699;K00699;K00699;K00699;K00699;K00699;K00699	-	GO:0016740//transferase activity	-
MSTRG.29709.1	NW_011952372.1	205490	207809	-	ncbi_105391985	202851	203551	+	DOWNSTREAM	1938	LOC105391985	uncharacterized LOC105391985	-	-	-	-	-	-	-
MSTRG.29709.1	NW_011952372.1	205490	207809	-	ncbi_105391986	208434	211035	-	DOWNSTREAM	624	LOC105391986	BAG family molecular chaperone regulator 2-like	Genetic Information Processing	Folding, sorting and degradation	ko04141//Protein processing in endoplasmic reticulum	K09556	-	-	-
MSTRG.29836.1	NW_011952377.1	45257	46146	-	ncbi_105392057	53336	66863	-	DOWNSTREAM	7189	LOC105392057	HEAT repeat-containing protein 6-like	-	-	-	-	-	-	-
XR_960965.1	NW_011952377.1	143258	144370	-	ncbi_105392061	151062	152199	-	DOWNSTREAM	6691	LOC105392061	biogenesis of lysosome-related organelles complex 1 subunit 1	-	-	-	-	-	-	-
XR_960965.1	NW_011952377.1	143258	144370	-	ncbi_105392058	129882	141375	-	UPSTREAM	1882	LOC105392058	pyridoxal kinase-like	Metabolism;Metabolism	Global and overview maps;Metabolism of cofactors and vitamins	ko01100//Metabolic pathways;ko00750//Vitamin B6 metabolism	K00868;K00868	-	GO:0016772//transferase activity, transferring phosphorus-containing groups	GO:0042823//pyridoxal phosphate biosynthetic process
MSTRG.29853.1	NW_011952377.1	146532	148141	+	ncbi_105392061	151062	152199	-	DOWNSTREAM	2920	LOC105392061	biogenesis of lysosome-related organelles complex 1 subunit 1	-	-	-	-	-	-	-
MSTRG.29853.1	NW_011952377.1	146532	148141	+	ncbi_105392058	129882	141375	-	UPSTREAM	5156	LOC105392058	pyridoxal kinase-like	Metabolism;Metabolism	Global and overview maps;Metabolism of cofactors and vitamins	ko01100//Metabolic pathways;ko00750//Vitamin B6 metabolism	K00868;K00868	-	GO:0016772//transferase activity, transferring phosphorus-containing groups	GO:0042823//pyridoxal phosphate biosynthetic process
MSTRG.29886.1	NW_011952378.1	211702	214521	-	ncbi_105392072	214626	219313	-	DOWNSTREAM	104	LOC105392072	uncharacterized LOC105392072	-	-	-	-	-	-	-
MSTRG.29886.1	NW_011952378.1	211702	214521	-	ncbi_105392073	219728	222766	+	UPSTREAM	5206	LOC105392073	p21-activated protein kinase-interacting protein 1-like	-	-	-	-	-	-	-
MSTRG.29892.1	NW_011952378.1	256450	261051	-	ncbi_105392074	245937	256175	+	DOWNSTREAM	274	LOC105392074	thyroglobulin-like	-	-	-	-	-	-	-
MSTRG.29892.1	NW_011952378.1	256450	261051	-	ncbi_105392075	263953	267864	-	DOWNSTREAM	2901	LOC105392075	nucleolar and coiled-body phosphoprotein 1-like	-	-	-	-	-	-	-
MSTRG.29971.3	NW_011952380.1	322092	323366	+	ncbi_105392120	323426	325052	-	DOWNSTREAM	59	LOC105392120	uncharacterized LOC105392120	-	-	-	-	-	-	-
MSTRG.29971.3	NW_011952380.1	322092	323366	+	ncbi_105392122	327865	330281	+	UPSTREAM	4498	LOC105392122	uncharacterized LOC105392122	-	-	-	-	-	-	-
MSTRG.29971.3	NW_011952380.1	322092	323366	+	ncbi_105392134	330755	332636	-	DOWNSTREAM	7388	LOC105392134	N(4)-(Beta-N-acetylglucosaminyl)-L-asparaginase-like	Cellular Processes;Metabolism	Transport and catabolism;Glycan biosynthesis and metabolism	ko04142//Lysosome;ko00511//Other glycan degradation	K01444;K01444	-	-	-
MSTRG.29971.3	NW_011952380.1	322092	323366	+	ncbi_105392121	325376	327710	-	DOWNSTREAM	2009	LOC105392121	uncharacterized LOC105392121	-	-	-	-	-	-	-
MSTRG.29989.1	NW_011952381.1	190874	191822	+	ncbi_105392142	110380	190375	+	DOWNSTREAM	498	LOC105392142	high affinity cAMP-specific and IBMX-insensitive 3'	Metabolism	Nucleotide metabolism	ko00230//Purine metabolism	K18437	-	-	-
MSTRG.29991.1	NW_011952381.1	194269	195075	+	ncbi_105392142	110380	190375	+	DOWNSTREAM	3893	LOC105392142	high affinity cAMP-specific and IBMX-insensitive 3'	Metabolism	Nucleotide metabolism	ko00230//Purine metabolism	K18437	-	-	-
MSTRG.30074.2	NW_011952383.1	325855	326715	-	ncbi_105392177	273559	319762	-	UPSTREAM	6092	LOC105392177	hemocytin-like	-	-	-	-	-	-	-
MSTRG.30074.3	NW_011952383.1	325878	326704	-	ncbi_105392177	273559	319762	-	UPSTREAM	6115	LOC105392177	hemocytin-like	-	-	-	-	-	-	-
MSTRG.30144.1	NW_011952385.1	238049	238722	-	ncbi_105392207	230608	232222	-	UPSTREAM	5826	LOC105392207	uncharacterized LOC105392207	-	-	-	-	-	-	-
MSTRG.30144.1	NW_011952385.1	238049	238722	-	ncbi_105392222	234883	237883	+	DOWNSTREAM	165	LOC105392222	glutamic acid-rich protein-like	-	-	-	-	-	-	-
MSTRG.30144.1	NW_011952385.1	238049	238722	-	MSTRG.30147	242310	243759	-	DOWNSTREAM	3587	--	-	-	-	-	-	-	-	-
MSTRG.30225.3	NW_011952387.1	303952	311494	-	ncbi_105392245	292141	299274	+	DOWNSTREAM	4677	LOC105392245	DNA replication licensing factor Mcm5-like	Genetic Information Processing	Replication and repair	ko03030//DNA replication	K02209	-	-	-
MSTRG.30295.1	NW_011952390.1	61650	63866	-	ncbi_105392298	30774	52814	-	UPSTREAM	8835	LOC105392298	aminoacylase-1-like	Metabolism;Metabolism;Metabolism;Metabolism;Metabolism;Metabolism	Global and overview maps;Global and overview maps;Global and overview maps;Global and overview maps;Global and overview maps;Amino acid metabolism	ko01100//Metabolic pathways;ko01110//Biosynthesis of secondary metabolites;ko01130//Biosynthesis of antibiotics;ko01230//Biosynthesis of amino acids;ko01210//2-Oxocarboxylic acid metabolism;ko00220//Arginine biosynthesis	K14677;K14677;K14677;K14677;K14677;K14677	-	-	-
MSTRG.30322.6	NW_011952391.1	39135	40075	+	ncbi_105392312	44994	77802	+	UPSTREAM	4918	LOC105392312	eukaryotic translation initiation factor 5-like	Genetic Information Processing	Translation	ko03013//RNA transport	K03262	-	-	-
MSTRG.30373.1	NW_011952392.1	163785	165615	-	ncbi_105392339	167089	168441	+	UPSTREAM	1473	LOC105392339	speckle-type POZ protein-like	-	-	-	-	-	-	-
MSTRG.30373.1	NW_011952392.1	163785	165615	-	ncbi_105392364	168626	169343	-	DOWNSTREAM	3010	LOC105392364	probable RNA-binding protein EIF1AD	-	-	-	-	-	GO:0008135//translation factor activity, RNA binding	GO:0006412//translation
MSTRG.30373.1	NW_011952392.1	163785	165615	-	ncbi_105392340	169588	184664	-	DOWNSTREAM	3972	LOC105392340	DNA polymerase subunit gamma-1	-	-	-	-	-	-	-
MSTRG.30555.1	NW_011952397.1	216015	221490	-	ncbi_105392423	197055	210435	+	DOWNSTREAM	5579	LOC105392423	inter alpha-trypsin inhibitor	-	-	-	-	-	-	-
MSTRG.30555.1	NW_011952397.1	216015	221490	-	ncbi_105392427	211455	215236	+	DOWNSTREAM	778	LOC105392427	uncharacterized LOC105392427	-	-	-	-	-	-	-
MSTRG.30665.2	NW_011952401.1	89203	91241	+	ncbi_105392474	84541	87183	-	UPSTREAM	2019	LOC105392474	esterase E4-like	-	-	-	-	-	-	-
MSTRG.30665.2	NW_011952401.1	89203	91241	+	ncbi_105392473	51352	83587	+	DOWNSTREAM	5615	LOC105392473	protein CASC1-like	-	-	-	-	-	-	-
MSTRG.30665.2	NW_011952401.1	89203	91241	+	ncbi_105392485	93600	119923	+	UPSTREAM	2358	LOC105392485	uncharacterized LOC105392485	Genetic Information Processing	Folding, sorting and degradation	ko03018//RNA degradation	K12617	-	-	-
MSTRG.30675.1	NW_011952401.1	227152	227922	-	ncbi_105392489	217758	219800	+	DOWNSTREAM	7351	LOC105392489	plasminogen activator inhibitor 1 RNA-binding protein-like	-	-	-	-	-	-	-
MSTRG.30721.1	NW_011952403.1	240083	241267	+	ncbi_105392512	243406	290916	+	UPSTREAM	2138	LOC105392512	uncharacterized LOC105392512	-	-	-	-	-	-	-
MSTRG.30765.1	NW_011952405.1	126604	131431	-	ncbi_105392531	124195	124856	+	DOWNSTREAM	1747	LOC105392531	uncharacterized LOC105392531	-	-	-	-	-	-	-
MSTRG.30765.1	NW_011952405.1	126604	131431	-	ncbi_105392535	136458	140039	-	DOWNSTREAM	5026	LOC105392535	uncharacterized LOC105392535	-	-	-	-	-	-	-
MSTRG.30766.1	NW_011952405.1	133475	136188	+	ncbi_105392531	124195	124856	+	DOWNSTREAM	8618	LOC105392531	uncharacterized LOC105392531	-	-	-	-	-	-	-
MSTRG.30766.1	NW_011952405.1	133475	136188	+	ncbi_105392535	136458	140039	-	DOWNSTREAM	269	LOC105392535	uncharacterized LOC105392535	-	-	-	-	-	-	-
MSTRG.30766.1	NW_011952405.1	133475	136188	+	ncbi_105392548	142558	144227	+	UPSTREAM	6369	LOC105392548	asparagine synthetase [glutamine-hydrolyzing]	Metabolism;Metabolism;Metabolism	Global and overview maps;Global and overview maps;Amino acid metabolism	ko01100//Metabolic pathways;ko01110//Biosynthesis of secondary metabolites;ko00250//Alanine, aspartate and glutamate metabolism	K01953;K01953;K01953	-	GO:0016884//carbon-nitrogen ligase activity, with glutamine as amido-N-donor;GO:0032550//purine ribonucleoside binding	GO:0006529//asparagine biosynthetic process
MSTRG.30766.1	NW_011952405.1	133475	136188	+	ncbi_105392533	130870	131431	-	UPSTREAM	2043	LOC105392533	uncharacterized LOC105392533	-	-	-	-	-	-	-
MSTRG.30833.1	NW_011952408.1	41054	41649	-	MSTRG.30835	41706	45490	-	DOWNSTREAM	56	TY3B-I	polyprotein [Mizuhopecten yessoensis]	-	-	-	-	-	-	-
MSTRG.30888.3	NW_011952410.1	37173	37851	+	ncbi_105392597	40125	41442	+	UPSTREAM	2273	LOC105392597	uncharacterized LOC105392597	-	-	-	-	-	-	-
MSTRG.30888.3	NW_011952410.1	37173	37851	+	MSTRG.30891	46988	50665	-	DOWNSTREAM	9136	--	-	-	-	-	-	-	-	-
MSTRG.30902.2	NW_011952410.1	96108	96484	-	ncbi_105392601	83530	88205	-	UPSTREAM	7902	LOC105392601	coiled-coil domain-containing protein 132	-	-	-	-	-	-	-
MSTRG.30917.1	NW_011952410.1	236172	237373	+	ncbi_105392607	238690	249216	+	UPSTREAM	1316	LOC105392607	uncharacterized LOC105392607	Metabolism;Metabolism;Metabolism;Metabolism;Metabolism	Global and overview maps;Carbohydrate metabolism;Carbohydrate metabolism;Lipid metabolism;Carbohydrate metabolism	ko01100//Metabolic pathways;ko00040//Pentose and glucuronate interconversions;ko00052//Galactose metabolism;ko00561//Glycerolipid metabolism;ko00051//Fructose and mannose metabolism	K00011;K00011;K00011;K00011;K00011	-	-	-
MSTRG.31012.1	NW_011952414.1	284	96570	-	ncbi_105392672	97451	123027	-	DOWNSTREAM	880	LOC105392672	solute carrier family 10 member 6-like	-	-	-	-	-	-	-
MSTRG.31030.1	NW_011952414.1	96699	97336	-	ncbi_105392670	82032	90893	+	DOWNSTREAM	5805	LOC105392670	isocitrate dehydrogenase [NAD] subunit beta	Metabolism;Metabolism;Metabolism;Metabolism;Metabolism;Metabolism;Metabolism;Metabolism	Global and overview maps;Global and overview maps;Global and overview maps;Global and overview maps;Global and overview maps;Global and overview maps;Carbohydrate metabolism;Global and overview maps	ko01100//Metabolic pathways;ko01110//Biosynthesis of secondary metabolites;ko01130//Biosynthesis of antibiotics;ko01120//Microbial metabolism in diverse environments;ko01200//Carbon metabolism;ko01230//Biosynthesis of amino acids;ko00020//Citrate cycle (TCA cycle);ko01210//2-Oxocarboxylic acid metabolism	K00030;K00030;K00030;K00030;K00030;K00030;K00030;K00030	-	-	-
MSTRG.31030.1	NW_011952414.1	96699	97336	-	ncbi_105392671	90914	93114	-	UPSTREAM	3584	LOC105392671	uncharacterized LOC105392671	-	-	-	-	-	-	-
MSTRG.31030.1	NW_011952414.1	96699	97336	-	ncbi_105392672	97451	123027	-	DOWNSTREAM	114	LOC105392672	solute carrier family 10 member 6-like	-	-	-	-	-	-	-
MSTRG.31031.1	NW_011952414.1	97420	99382	-	ncbi_105392670	82032	90893	+	DOWNSTREAM	6526	LOC105392670	isocitrate dehydrogenase [NAD] subunit beta	Metabolism;Metabolism;Metabolism;Metabolism;Metabolism;Metabolism;Metabolism;Metabolism	Global and overview maps;Global and overview maps;Global and overview maps;Global and overview maps;Global and overview maps;Global and overview maps;Carbohydrate metabolism;Global and overview maps	ko01100//Metabolic pathways;ko01110//Biosynthesis of secondary metabolites;ko01130//Biosynthesis of antibiotics;ko01120//Microbial metabolism in diverse environments;ko01200//Carbon metabolism;ko01230//Biosynthesis of amino acids;ko00020//Citrate cycle (TCA cycle);ko01210//2-Oxocarboxylic acid metabolism	K00030;K00030;K00030;K00030;K00030;K00030;K00030;K00030	-	-	-
MSTRG.31031.1	NW_011952414.1	97420	99382	-	ncbi_105392671	90914	93114	-	UPSTREAM	4305	LOC105392671	uncharacterized LOC105392671	-	-	-	-	-	-	-
MSTRG.31069.2	NW_011952415.1	112854	113905	-	ncbi_105392689	104009	111053	-	UPSTREAM	1800	LOC105392689	putative inorganic phosphate cotransporter	-	-	-	-	-	-	-
MSTRG.31460.1	NW_011952428.1	196214	199232	+	ncbi_105392900	189653	195990	+	DOWNSTREAM	223	LOC105392900	uncharacterized LOC105392900	-	-	-	-	-	-	-
MSTRG.31460.1	NW_011952428.1	196214	199232	+	ncbi_105392902	199711	200418	+	UPSTREAM	478	LOC105392902	uncharacterized LOC105392902	-	-	-	-	-	-	-
MSTRG.31465.1	NW_011952428.1	202649	204029	+	ncbi_105392900	189653	195990	+	DOWNSTREAM	6658	LOC105392900	uncharacterized LOC105392900	-	-	-	-	-	-	-
MSTRG.31465.1	NW_011952428.1	202649	204029	+	ncbi_105392902	199711	200418	+	DOWNSTREAM	2230	LOC105392902	uncharacterized LOC105392902	-	-	-	-	-	-	-
MSTRG.31481.1	NW_011952428.1	270758	273744	+	ncbi_105392913	276324	279462	+	UPSTREAM	2579	LOC105392913	probable RNA-binding protein CG14230	-	-	-	-	-	-	-
MSTRG.31588.1	NW_011952432.1	195225	197157	-	ncbi_105392971	199062	200709	+	UPSTREAM	1904	LOC105392971	uncharacterized LOC105392971	-	-	-	-	-	-	-
MSTRG.31698.9	NW_011952436.1	152351	153614	-	ncbi_105393018	159864	161387	-	DOWNSTREAM	6249	LOC105393018	intraflagellar transport protein 22 homolog	-	-	-	-	-	-	-
MSTRG.31747.1	NW_011952438.1	149138	151970	+	ncbi_105393031	157043	161271	+	UPSTREAM	5072	LOC105393031	trithorax group protein osa-like	-	-	-	-	-	-	-
MSTRG.31849.1	NW_011952441.1	147917	149678	+	ncbi_105393084	143625	145996	-	UPSTREAM	1920	LOC105393084	protein MCM10 homolog	-	-	-	-	-	-	-
MSTRG.31849.1	NW_011952441.1	147917	149678	+	ncbi_105393085	150296	158271	+	UPSTREAM	617	LOC105393085	fumarylacetoacetase-like	Metabolism;Metabolism;Metabolism	Global and overview maps;Global and overview maps;Amino acid metabolism	ko01100//Metabolic pathways;ko01120//Microbial metabolism in diverse environments;ko00350//Tyrosine metabolism	K01555;K01555;K01555	-	GO:0016823//hydrolase activity, acting on acid carbon-carbon bonds, in ketonic substances	GO:0006520//cellular amino acid metabolic process
MSTRG.31994.1	NW_011952446.1	179086	186110	-	ncbi_105393158	173967	176852	-	UPSTREAM	2233	LOC105393158	aurora kinase B-like	-	-	-	-	-	GO:0004672//protein kinase activity;GO:0032550//purine ribonucleoside binding	GO:0006464//cellular protein modification process;GO:0006796//phosphate-containing compound metabolic process;GO:0010646//regulation of cell communication
MSTRG.31994.1	NW_011952446.1	179086	186110	-	ncbi_105393159	189460	191149	+	UPSTREAM	3349	LOC105393159	ejaculatory bulb-specific protein 3-like	-	-	-	-	-	-	-
MSTRG.31994.1	NW_011952446.1	179086	186110	-	ncbi_105393180	136804	170015	+	DOWNSTREAM	9070	LOC105393180	ecdysone 20-monooxygenase	Metabolism	Metabolism of terpenoids and polyketides	ko00981//Insect hormone biosynthesis	K10723	-	GO:0008395//steroid hydroxylase activity;GO:0043169//cation binding;GO:0046906//tetrapyrrole binding	GO:0044710//single-organism metabolic process
MSTRG.32044.1	NW_011952448.1	676	4436	+	ncbi_105393204	6356	12194	+	UPSTREAM	1919	LOC105393204	uncharacterized LOC105393204	-	-	-	-	-	-	-
MSTRG.32173.1	NW_011952453.1	48298	54660	+	ncbi_105393261	1540	40102	-	UPSTREAM	8195	LOC105393261	lysosome membrane protein 2-like	-	-	-	-	-	-	-
MSTRG.32402.1	NW_011952461.1	213475	229631	+	ncbi_105393367	229690	252805	+	UPSTREAM	58	LOC105393367	microtubule-associated serine/threonine-protein kinase 3-like	-	-	-	-	-	-	-
MSTRG.32463.5	NW_011952464.1	62728	64208	+	ncbi_105393409	67145	86738	-	DOWNSTREAM	2936	LOC105393409	WD repeat-containing protein on Y chromosome-like	-	-	-	-	-	-	-
MSTRG.32475.2	NW_011952464.1	162706	163034	-	ncbi_105393402	158641	162053	-	UPSTREAM	652	LOC105393402	solute carrier family 52	-	-	-	-	-	-	-
MSTRG.32483.1	NW_011952464.1	216285	216689	-	ncbi_105393404	221434	244099	+	UPSTREAM	4744	LOC105393404	SID1 transmembrane family member 2-like	-	-	-	-	-	-	-
MSTRG.32528.1	NW_011952466.1	212136	213452	+	ncbi_105393442	213521	218186	-	DOWNSTREAM	68	LOC105393442	ADP-ribosylation factor-like protein 13B	-	-	-	-	-	-	-
MSTRG.32528.1	NW_011952466.1	212136	213452	+	ncbi_105393443	218736	224571	-	DOWNSTREAM	5283	LOC105393443	tubulin-specific chaperone E-like	-	-	-	-	-	-	-
MSTRG.32666.1	NW_011952472.1	178340	179129	+	ncbi_105393523	169833	171297	+	DOWNSTREAM	7042	LOC105393523	lipase 1-like	-	-	-	-	-	-	-
XR_961026.1	NW_011952473.1	77154	80986	+	ncbi_105393546	75824	76897	-	UPSTREAM	256	LOC105393546	small glutamine-rich tetratricopeptide repeat-containing protein alpha-like	-	-	-	-	-	-	-
XR_961026.1	NW_011952473.1	77154	80986	+	ncbi_105393531	54498	73267	+	DOWNSTREAM	3886	LOC105393531	EH domain-containing protein 1	Cellular Processes	Transport and catabolism	ko04144//Endocytosis	K12483	-	-	-
XR_961027.1	NW_011952473.1	77482	80986	+	ncbi_105393546	75824	76897	-	UPSTREAM	584	LOC105393546	small glutamine-rich tetratricopeptide repeat-containing protein alpha-like	-	-	-	-	-	-	-
XR_961027.1	NW_011952473.1	77482	80986	+	ncbi_105393531	54498	73267	+	DOWNSTREAM	4214	LOC105393531	EH domain-containing protein 1	Cellular Processes	Transport and catabolism	ko04144//Endocytosis	K12483	-	-	-
MSTRG.32774.1	NW_011952476.1	15475	15904	+	ncbi_105393602	15985	17356	+	UPSTREAM	80	LOC105393602	uncharacterized LOC105393602	-	-	-	-	-	-	-
MSTRG.32825.3	NW_011952478.1	31578	32546	-	ncbi_105393633	11905	30879	-	UPSTREAM	698	LOC105393633	G-box-binding factor-like	-	-	-	-	-	-	-
MSTRG.32825.3	NW_011952478.1	31578	32546	-	ncbi_105393650	38780	53511	-	DOWNSTREAM	6233	LOC105393650	uncharacterized LOC105393650	-	-	-	-	-	-	-
MSTRG.32836.1	NW_011952478.1	77161	77964	-	ncbi_105393640	78598	90479	-	DOWNSTREAM	633	LOC105393640	lipase member H-like	-	-	-	-	-	-	-
MSTRG.32950.1	NW_011952482.1	55436	56159	-	ncbi_105393703	42268	53988	-	UPSTREAM	1447	LOC105393703	proto-oncogene tyrosine-protein kinase ROS-like	Environmental Information Processing	Signal transduction	ko04013//MAPK signaling pathway - fly	K05088	-	-	-
MSTRG.32991.1	NW_011952483.1	118763	120017	+	ncbi_105393714	97990	118726	+	DOWNSTREAM	36	LOC105393714	amidophosphoribosyltransferase-like	Metabolism;Metabolism;Metabolism;Metabolism;Metabolism	Global and overview maps;Global and overview maps;Global and overview maps;Nucleotide metabolism;Amino acid metabolism	ko01100//Metabolic pathways;ko01110//Biosynthesis of secondary metabolites;ko01130//Biosynthesis of antibiotics;ko00230//Purine metabolism;ko00250//Alanine, aspartate and glutamate metabolism	K00764;K00764;K00764;K00764;K00764	-	-	-
MSTRG.33112.1	NW_011952488.1	195352	195822	+	ncbi_105393764	190664	194090	-	UPSTREAM	1261	LOC105393764	zinc finger protein 568-like	-	-	-	-	-	-	-
MSTRG.33151.1	NW_011952491.1	91584	94186	+	ncbi_105393786	80578	83495	+	DOWNSTREAM	8088	LOC105393786	larval cuticle protein LCP-17-like	-	-	-	-	-	-	-
MSTRG.33241.2	NW_011952495.1	59999	61705	-	ncbi_105393842	40216	51796	+	DOWNSTREAM	8202	LOC105393842	globin-like	-	-	-	-	-	-	-
MSTRG.33331.1	NW_011952498.1	54063	54984	-	ncbi_105393886	43638	44820	+	DOWNSTREAM	9242	LOC105393886	trypsin	Environmental Information Processing	Signaling molecules and interaction	ko04080//Neuroactive ligand-receptor interaction	K01312	-	-	-
MSTRG.33331.1	NW_011952498.1	54063	54984	-	ncbi_105393887	56978	59126	-	DOWNSTREAM	1993	LOC105393887	achelase-1-like	Environmental Information Processing	Signaling molecules and interaction	ko04080//Neuroactive ligand-receptor interaction	K01312	-	-	-
MSTRG.33331.1	NW_011952498.1	54063	54984	-	ncbi_105393891	48391	49278	-	UPSTREAM	4784	LOC105393891	chymotrypsin-like elastase family member 2B	Environmental Information Processing	Signaling molecules and interaction	ko04080//Neuroactive ligand-receptor interaction	K01312	-	-	-
MSTRG.33385.1	NW_011952500.1	162422	165488	+	ncbi_105393914	157807	161593	+	DOWNSTREAM	828	LOC105393914	uncharacterized LOC105393914	-	-	-	-	-	-	-
MSTRG.33455.1	NW_011952503.1	137500	138412	+	ncbi_105393945	112207	135464	+	DOWNSTREAM	2035	LOC105393945	stress protein DDR48-like	-	-	-	-	-	-	-
MSTRG.33509.1	NW_011952505.1	115794	116630	+	MSTRG.33511	126409	138898	-	DOWNSTREAM	9778	--	-	-	-	-	-	-	-	-
XR_961046.1	NW_011952505.1	121750	123600	+	MSTRG.33511	126409	138898	-	DOWNSTREAM	2808	--	-	-	-	-	-	-	-	-
MSTRG.33615.1	NW_011952510.1	200492	201930	+	ncbi_105394038	205284	208682	+	UPSTREAM	3353	LOC105394038	uncharacterized LOC105394038	-	-	-	-	-	-	-
MSTRG.33709.1	NW_011952515.1	28060	30616	-	ncbi_105394095	13229	26433	+	DOWNSTREAM	1626	LOC105394095	lysine histidine transporter 1-like	-	-	-	-	GO:0031224//intrinsic component of membrane	-	-
MSTRG.33736.1	NW_011952516.1	47548	49361	+	ncbi_105394101	53094	92153	+	UPSTREAM	3732	LOC105394101	kinesin-like protein Klp10A	-	-	-	-	-	-	-
MSTRG.33745.1	NW_011952516.1	173412	175356	-	ncbi_105394106	175488	179066	-	DOWNSTREAM	131	LOC105394106	myrosinase 1-like	-	-	-	-	-	-	-
MSTRG.33745.1	NW_011952516.1	173412	175356	-	ncbi_105394107	179925	192890	-	DOWNSTREAM	4568	LOC105394107	multidrug resistance protein homolog 49-like	Environmental Information Processing	Membrane transport	ko02010//ABC transporters	K05658	-	-	-
MSTRG.33751.1	NW_011952517.1	27638	30001	+	ncbi_105394112	22740	23887	+	DOWNSTREAM	3750	LOC105394112	uncharacterized LOC105394112	-	-	-	-	-	-	-
MSTRG.33755.1	NW_011952517.1	62734	65996	+	ncbi_105394119	73222	81029	+	UPSTREAM	7225	LOC105394119	uncharacterized LOC105394119	-	-	-	-	-	-	-
XR_961055.1	NW_011952524.1	140375	141714	+	ncbi_105394164	145586	146793	+	UPSTREAM	3871	LOC105394164	uncharacterized protein C1orf177 homolog	-	-	-	-	-	-	-
MSTRG.33868.1	NW_011952524.1	140375	142258	+	ncbi_105394164	145586	146793	+	UPSTREAM	3327	LOC105394164	uncharacterized protein C1orf177 homolog	-	-	-	-	-	-	-
XR_961056.1	NW_011952526.1	32655	35224	+	ncbi_105394194	24859	28504	+	DOWNSTREAM	4150	LOC105394194	kinesin heavy chain-like	Cellular Processes	Transport and catabolism	ko04144//Endocytosis	K10396	GO:0015630//microtubule cytoskeleton;GO:0043234//protein complex;GO:0044430//cytoskeletal part	GO:0005488//binding	-
XR_961056.1	NW_011952526.1	32655	35224	+	ncbi_105394193	5726	24670	-	UPSTREAM	7984	LOC105394193	integrin beta-PS-like	Cellular Processes;Environmental Information Processing	Transport and catabolism;Signaling molecules and interaction	ko04145//Phagosome;ko04512//ECM-receptor interaction	K05719;K05719	GO:0031224//intrinsic component of membrane	-	GO:0007166//cell surface receptor signaling pathway;GO:0022610//biological adhesion;GO:0044707//single-multicellular organism process
MSTRG.33917.1	NW_011952526.1	64883	65484	-	ncbi_105394198	67550	70339	-	DOWNSTREAM	2065	LOC105394198	beta-galactosidase-like	Metabolism;Cellular Processes;Metabolism;Metabolism;Metabolism;Metabolism;Metabolism	Global and overview maps;Transport and catabolism;Carbohydrate metabolism;Lipid metabolism;Glycan biosynthesis and metabolism;Glycan biosynthesis and metabolism;Glycan biosynthesis and metabolism	ko01100//Metabolic pathways;ko04142//Lysosome;ko00052//Galactose metabolism;ko00600//Sphingolipid metabolism;ko00511//Other glycan degradation;ko00531//Glycosaminoglycan degradation;ko00604//Glycosphingolipid biosynthesis - ganglio series	K12309;K12309;K12309;K12309;K12309;K12309;K12309	-	GO:0016787//hydrolase activity	-
MSTRG.33965.4	NW_011952527.1	151276	153046	-	ncbi_105394221	148326	150557	+	DOWNSTREAM	718	LOC105394221	uncharacterized protein DDB_G0284459-like	Metabolism;Metabolism	Global and overview maps;Energy metabolism	ko01100//Metabolic pathways;ko00190//Oxidative phosphorylation	K03880;K03880	GO:0031090//organelle membrane;GO:0044425//membrane part	GO:0050136//NADH dehydrogenase (quinone) activity	GO:0044710//single-organism metabolic process
MSTRG.33965.4	NW_011952527.1	151276	153046	-	ncbi_105394211	145073	147789	-	UPSTREAM	3486	LOC105394211	cytochrome b-c1 complex subunit 9	Metabolism;Metabolism	Global and overview maps;Energy metabolism	ko01100//Metabolic pathways;ko00190//Oxidative phosphorylation	K02262;K02262	GO:0031224//intrinsic component of membrane;GO:0043231//intracellular membrane-bounded organelle	GO:0016491//oxidoreductase activity	GO:0015992//proton transport;GO:0022904//respiratory electron transport chain
MSTRG.34034.1	NW_011952531.1	25407	26412	+	ncbi_105394248	31961	46405	-	DOWNSTREAM	5548	LOC105394248	forkhead box protein E1-like	-	-	-	-	-	-	-
MSTRG.34098.1	NW_011952534.1	180583	181701	+	ncbi_105394281	170191	176679	-	UPSTREAM	3903	LOC105394281	dynein assembly factor 5	-	-	-	-	-	-	-
MSTRG.34098.1	NW_011952534.1	180583	181701	+	ncbi_105394283	182819	184010	+	UPSTREAM	1117	LOC105394283	mesencephalic astrocyte-derived neurotrophic factor homolog	-	-	-	-	-	-	-
MSTRG.34098.1	NW_011952534.1	180583	181701	+	ncbi_105394284	184366	185340	-	DOWNSTREAM	2664	LOC105394284	putative ATP synthase subunit f	Metabolism;Metabolism	Global and overview maps;Energy metabolism	ko01100//Metabolic pathways;ko00190//Oxidative phosphorylation	K02130;K02130	-	-	-
MSTRG.34098.1	NW_011952534.1	180583	181701	+	ncbi_105394288	189278	190839	+	UPSTREAM	7576	LOC105394288	uncharacterized LOC105394288	-	-	-	-	-	-	-
MSTRG.34151.1	NW_011952537.1	1921	2694	+	ncbi_105394316	3597	7669	+	UPSTREAM	902	LOC105394316	leukocyte receptor cluster member 8 homolog	-	-	-	-	-	GO:0003824//catalytic activity	GO:0008152//metabolic process
MSTRG.34306.1	NW_011952546.1	95630	103792	+	ncbi_105394413	104536	109847	-	DOWNSTREAM	743	LOC105394413	aldose reductase-like	Metabolism;Metabolism;Metabolism;Metabolism;Metabolism	Global and overview maps;Carbohydrate metabolism;Carbohydrate metabolism;Lipid metabolism;Carbohydrate metabolism	ko01100//Metabolic pathways;ko00040//Pentose and glucuronate interconversions;ko00052//Galactose metabolism;ko00561//Glycerolipid metabolism;ko00051//Fructose and mannose metabolism	K00011;K00011;K00011;K00011;K00011	-	-	-
MSTRG.34375.1	NW_011952550.1	127892	128883	+	ncbi_105394444	118584	121675	-	UPSTREAM	6216	LOC105394444	MATH and LRR domain-containing protein PFE0570w-like	-	-	-	-	-	-	-
MSTRG.34417.1	NW_011952552.1	148654	149951	-	ncbi_105394469	152150	168046	-	DOWNSTREAM	2198	LOC105394469	hrp65 protein-like	-	-	-	-	-	-	-
MSTRG.34466.1	NW_011952555.1	25544	26327	-	ncbi_105394486	1853	16529	-	UPSTREAM	9014	LOC105394486	lysosome membrane protein 2-like	-	-	-	-	-	-	-
MSTRG.34574.1	NW_011952560.1	109609	150320	+	ncbi_105394554	152797	168113	-	DOWNSTREAM	2476	LOC105394554	transcription intermediary factor 1-beta-like	-	-	-	-	-	-	-
MSTRG.34611.1	NW_011952562.1	112416	117045	+	ncbi_105394569	71140	109444	+	DOWNSTREAM	2971	LOC105394569	innexin inx1-like	-	-	-	-	GO:0016020//membrane	-	GO:0006810//transport
MSTRG.34716.1	NW_011952569.1	86971	87770	+	ncbi_105394642	74668	85859	+	DOWNSTREAM	1111	LOC105394642	endonuclease/exonuclease/phosphatase family domain-containing protein 1-like	-	-	-	-	-	-	-
MSTRG.34746.1	NW_011952570.1	149349	150598	-	ncbi_105394656	152414	160116	-	DOWNSTREAM	1815	LOC105394656	galactosylgalactosylxylosylprotein 3-beta-glucuronosyltransferase I	Metabolism;Metabolism;Metabolism	Global and overview maps;Glycan biosynthesis and metabolism;Glycan biosynthesis and metabolism	ko01100//Metabolic pathways;ko00534//Glycosaminoglycan biosynthesis - heparan sulfate / heparin;ko00532//Glycosaminoglycan biosynthesis - chondroitin sulfate / dermatan sulfate	K10158;K10158;K10158	-	-	-
MSTRG.34746.1	NW_011952570.1	149349	150598	-	ncbi_105394655	114908	141429	+	DOWNSTREAM	7919	LOC105394655	fasciclin-2-like	-	-	-	-	-	-	-
MSTRG.34836.1	NW_011952577.1	37710	41036	-	ncbi_105394725	42521	47055	+	UPSTREAM	1484	LOC105394725	3-ketoacyl-CoA thiolase	Metabolism;Metabolism;Metabolism;Metabolism;Metabolism;Metabolism;Metabolism	Global and overview maps;Global and overview maps;Global and overview maps;Global and overview maps;Amino acid metabolism;Lipid metabolism;Lipid metabolism	ko01100//Metabolic pathways;ko01110//Biosynthesis of secondary metabolites;ko01130//Biosynthesis of antibiotics;ko01212//Fatty acid metabolism;ko00280//Valine, leucine and isoleucine degradation;ko00071//Fatty acid degradation;ko00062//Fatty acid elongation	K07508;K07508;K07508;K07508;K07508;K07508;K07508	-	-	-
MSTRG.34836.1	NW_011952577.1	37710	41036	-	ncbi_105394711	47424	48816	-	DOWNSTREAM	6387	LOC105394711	probable protein BRICK1-B	-	-	-	-	-	-	-
MSTRG.35148.2	NW_011952597.1	112805	123938	-	ncbi_105394879	105092	109052	-	UPSTREAM	3752	LOC105394879	elongation of very long chain fatty acids protein AAEL008004-like	Metabolism;Metabolism	Global and overview maps;Lipid metabolism	ko01110//Biosynthesis of secondary metabolites;ko00062//Fatty acid elongation	K10249;K10249	-	-	-
MSTRG.35148.2	NW_011952597.1	112805	123938	-	ncbi_105394881	123951	127504	-	DOWNSTREAM	12	LOC105394881	elongation of very long chain fatty acids protein AAEL008004-like	Metabolism;Metabolism	Global and overview maps;Lipid metabolism	ko01110//Biosynthesis of secondary metabolites;ko00062//Fatty acid elongation	K10249;K10249	-	-	-
MSTRG.35148.2	NW_011952597.1	112805	123938	-	ncbi_105394880	133276	135532	-	DOWNSTREAM	9337	LOC105394880	elongation of very long chain fatty acids protein AAEL008004-like	Metabolism;Metabolism	Global and overview maps;Lipid metabolism	ko01110//Biosynthesis of secondary metabolites;ko00062//Fatty acid elongation	K10250;K10250	-	-	-
MSTRG.35311.1	NW_011952609.1	100791	102970	-	MSTRG.35309	95626	99259	+	DOWNSTREAM	1531	SETMAR	transposase [Attacus atlas]	Metabolism	Amino acid metabolism	ko00310//Lysine degradation	K11433	GO:0043231//intracellular membrane-bounded organelle;GO:0044427//chromosomal part	GO:0004520//endodeoxyribonuclease activity;GO:0018024//histone-lysine N-methyltransferase activity;GO:0019899//enzyme binding;GO:0043566//structure-specific DNA binding;GO:0046983//protein dimerization activity	GO:0006303//double-strand break repair via nonhomologous end joining;GO:0006308//DNA catabolic process;GO:0007093//mitotic cell cycle checkpoint;GO:0010452//histone H3-K36 methylation;GO:0010912//positive regulation of isomerase activity;GO:0010948//negative regulation of cell cycle process
MSTRG.35311.1	NW_011952609.1	100791	102970	-	ncbi_105394963	108538	120246	+	UPSTREAM	5567	LOC105394963	cytosolic 10-formyltetrahydrofolate dehydrogenase-like	Metabolism	Metabolism of cofactors and vitamins	ko00670//One carbon pool by folate	K00289	-	-	-
XR_961094.1	NW_011952609.1	103367	104270	+	MSTRG.35309	95626	99259	+	DOWNSTREAM	4107	SETMAR	transposase [Attacus atlas]	Metabolism	Amino acid metabolism	ko00310//Lysine degradation	K11433	GO:0043231//intracellular membrane-bounded organelle;GO:0044427//chromosomal part	GO:0004520//endodeoxyribonuclease activity;GO:0018024//histone-lysine N-methyltransferase activity;GO:0019899//enzyme binding;GO:0043566//structure-specific DNA binding;GO:0046983//protein dimerization activity	GO:0006303//double-strand break repair via nonhomologous end joining;GO:0006308//DNA catabolic process;GO:0007093//mitotic cell cycle checkpoint;GO:0010452//histone H3-K36 methylation;GO:0010912//positive regulation of isomerase activity;GO:0010948//negative regulation of cell cycle process
XR_961094.1	NW_011952609.1	103367	104270	+	ncbi_105394963	108538	120246	+	UPSTREAM	4267	LOC105394963	cytosolic 10-formyltetrahydrofolate dehydrogenase-like	Metabolism	Metabolism of cofactors and vitamins	ko00670//One carbon pool by folate	K00289	-	-	-
MSTRG.35374.1	NW_011952615.1	40923	42205	+	ncbi_105394999	39020	39833	+	DOWNSTREAM	1089	LOC105394999	prisilkin-39-like	-	-	-	-	-	-	-
MSTRG.35374.1	NW_011952615.1	40923	42205	+	ncbi_105395015	49483	50221	-	DOWNSTREAM	7277	LOC105395015	cuticle protein 16.5	-	-	-	-	-	-	-
MSTRG.35433.1	NW_011952618.1	97636	98088	-	ncbi_105395044	104421	126445	-	DOWNSTREAM	6332	LOC105395044	NACHT and WD repeat domain-containing protein 2-like	-	-	-	-	-	-	-
MSTRG.35534.2	NW_011952626.1	112419	113538	+	ncbi_105395097	122393	126897	+	UPSTREAM	8854	LOC105395097	uncharacterized LOC105395097	-	-	-	-	-	-	-
MSTRG.35599.1	NW_011952632.1	60854	65465	+	ncbi_105395136	52434	60638	+	DOWNSTREAM	215	LOC105395136	golgin subfamily A member 4-like	-	-	-	-	-	-	-
MSTRG.35686.2	NW_011952639.1	119521	121482	+	ncbi_105395186	111692	118227	-	UPSTREAM	1293	LOC105395186	mannosyl-oligosaccharide glucosidase-like	Metabolism;Genetic Information Processing;Metabolism	Global and overview maps;Folding, sorting and degradation;Glycan biosynthesis and metabolism	ko01100//Metabolic pathways;ko04141//Protein processing in endoplasmic reticulum;ko00510//N-Glycan biosynthesis	K01228;K01228;K01228	-	-	-
MSTRG.35864.3	NW_011952654.1	35577	39036	+	ncbi_105395328	47292	49967	+	UPSTREAM	8255	LOC105395328	cytochrome P450 6B6-like	-	-	-	-	-	-	-
MSTRG.35883.1	NW_011952656.1	4565	6926	-	ncbi_105395340	8620	10337	+	UPSTREAM	1693	LOC105395340	uncharacterized LOC105395340	-	-	-	-	-	-	-
XR_961102.1	NW_011952656.1	4565	6926	-	ncbi_105395340	8620	10337	+	UPSTREAM	1693	LOC105395340	uncharacterized LOC105395340	-	-	-	-	-	-	-
XR_961103.1	NW_011952656.1	100963	103309	-	ncbi_105395346	103415	117053	-	DOWNSTREAM	105	LOC105395346	acetyl-CoA carboxylase-like	Metabolism;Metabolism;Metabolism;Metabolism;Metabolism;Metabolism	Global and overview maps;Global and overview maps;Global and overview maps;Carbohydrate metabolism;Carbohydrate metabolism;Lipid metabolism	ko01100//Metabolic pathways;ko01110//Biosynthesis of secondary metabolites;ko01212//Fatty acid metabolism;ko00620//Pyruvate metabolism;ko00640//Propanoate metabolism;ko00061//Fatty acid biosynthesis	K11262;K11262;K11262;K11262;K11262;K11262	-	-	-
MSTRG.35998.1	NW_011952664.1	97763	99788	+	ncbi_105395448	87028	93893	+	DOWNSTREAM	3869	LOC105395448	serine protease 48-like	-	-	-	-	-	-	-
MSTRG.35998.1	NW_011952664.1	97763	99788	+	ncbi_105395450	106696	108334	+	UPSTREAM	6907	LOC105395450	uncharacterized LOC105395450	-	-	-	-	-	-	-
MSTRG.36056.1	NW_011952672.1	27385	27887	-	ncbi_105395488	30830	67617	-	DOWNSTREAM	2942	LOC105395488	uncharacterized LOC105395488	-	-	-	-	-	-	-
MSTRG.36101.1	NW_011952675.1	45915	47826	+	ncbi_105395506	44735	45844	+	DOWNSTREAM	70	LOC105395506	uncharacterized LOC105395506	-	-	-	-	-	-	-
XR_961114.1	NW_011952677.1	106865	108617	-	ncbi_105395526	74986	106631	+	DOWNSTREAM	233	LOC105395526	uncharacterized LOC105395526	-	-	-	-	-	-	-
MSTRG.36143.1	NW_011952678.1	39350	40401	-	ncbi_105395530	49948	55891	+	UPSTREAM	9546	LOC105395530	fatty acyl-CoA reductase 1-like	Cellular Processes	Transport and catabolism	ko04146//Peroxisome	K13356	-	-	-
XR_961119.1	NW_011952685.1	67956	69768	-	ncbi_105395568	11429	66087	-	UPSTREAM	1868	LOC105395568	uncharacterized LOC105395568	-	-	-	-	-	-	-
XR_961122.1	NW_011952687.1	11248	14472	-	ncbi_105395585	18537	28048	-	DOWNSTREAM	4064	LOC105395585	protein groucho-like	Environmental Information Processing;Environmental Information Processing	Signal transduction;Signal transduction	ko04310//Wnt signaling pathway;ko04330//Notch signaling pathway	K04497;K04497	-	-	-
XR_961122.1	NW_011952687.1	11248	14472	-	ncbi_105395583	14631	16536	-	DOWNSTREAM	158	LOC105395583	uncharacterized LOC105395583	-	-	-	-	-	-	-
MSTRG.36320.1	NW_011952697.1	5344	6310	+	ncbi_105395639	12212	14883	+	UPSTREAM	5901	LOC105395639	uncharacterized LOC105395639	-	-	-	-	-	-	-
MSTRG.36320.1	NW_011952697.1	5344	6310	+	ncbi_105395644	14770	35259	-	DOWNSTREAM	8459	LOC105395644	isocitrate dehydrogenase [NAD] subunit beta	Metabolism;Metabolism;Metabolism;Metabolism;Metabolism;Metabolism;Metabolism;Metabolism	Global and overview maps;Global and overview maps;Global and overview maps;Global and overview maps;Global and overview maps;Global and overview maps;Carbohydrate metabolism;Global and overview maps	ko01100//Metabolic pathways;ko01110//Biosynthesis of secondary metabolites;ko01130//Biosynthesis of antibiotics;ko01120//Microbial metabolism in diverse environments;ko01200//Carbon metabolism;ko01230//Biosynthesis of amino acids;ko00020//Citrate cycle (TCA cycle);ko01210//2-Oxocarboxylic acid metabolism	K00030;K00030;K00030;K00030;K00030;K00030;K00030;K00030	-	-	-
MSTRG.36340.1	NW_011952698.1	69867	72816	+	ncbi_105395651	78972	90352	+	UPSTREAM	6155	LOC105395651	uncharacterized LOC105395651	-	-	-	-	-	-	-
MSTRG.36438.1	NW_011952708.1	19244	21239	-	ncbi_105395701	6416	14398	-	UPSTREAM	4845	LOC105395701	sarcoplasmic calcium-binding protein-like	-	-	-	-	-	-	-
MSTRG.36438.1	NW_011952708.1	19244	21239	-	ncbi_105395702	24843	26829	-	DOWNSTREAM	3603	LOC105395702	vacuolar protein sorting-associated protein 29	Cellular Processes	Transport and catabolism	ko04144//Endocytosis	K18467	-	-	GO:0016192//vesicle-mediated transport
MSTRG.36455.1	NW_011952710.1	11981	13138	+	ncbi_105395714	2002	9630	+	DOWNSTREAM	2350	LOC105395714	cell wall protein DAN4-like	-	-	-	-	-	-	-
MSTRG.36496.1	NW_011952714.1	58340	58913	-	ncbi_105395740	65155	69725	-	DOWNSTREAM	6241	LOC105395740	pollen-specific leucine-rich repeat extensin-like protein 1	-	-	-	-	-	-	-
MSTRG.36566.1	NW_011952724.1	51726	62130	+	ncbi_105395780	62165	65759	-	DOWNSTREAM	34	LOC105395780	cytochrome b5-like	-	-	-	-	-	-	-
MSTRG.36575.1	NW_011952726.1	21704	22404	+	ncbi_105395817	12719	21698	+	DOWNSTREAM	5	LOC105395817	uncharacterized LOC105395817	-	-	-	-	-	-	-
MSTRG.36676.1	NW_011952736.1	18235	24342	-	ncbi_105395881	29055	30930	-	DOWNSTREAM	4712	LOC105395881	uncharacterized LOC105395881	-	-	-	-	-	-	-
MSTRG.36706.1	NW_011952740.1	23780	25232	-	ncbi_105395904	18201	22399	-	UPSTREAM	1380	LOC105395904	leukocyte receptor cluster member 8 homolog	-	-	-	-	-	-	-
MSTRG.36706.1	NW_011952740.1	23780	25232	-	ncbi_105395909	31361	36923	+	UPSTREAM	6128	LOC105395909	ecto-NOX disulfide-thiol exchanger 2-like	-	-	-	-	-	-	-
MSTRG.36773.1	NW_011952749.1	31439	33473	-	ncbi_105395945	19371	29311	+	DOWNSTREAM	2127	LOC105395945	serine/threonine-protein phosphatase rdgC-like	Organismal Systems	Sensory system	ko04745//Phototransduction - fly	K13807	-	-	-
MSTRG.36773.1	NW_011952749.1	31439	33473	-	ncbi_105395943	36366	43360	-	DOWNSTREAM	2892	LOC105395943	uncharacterized LOC105395943	-	-	-	-	-	-	-
MSTRG.36820.2	NW_011952755.1	74563	75396	+	ncbi_105395971	61053	73831	-	UPSTREAM	731	LOC105395971	ras-related protein Rab-5B-like	Cellular Processes;Cellular Processes	Transport and catabolism;Transport and catabolism	ko04144//Endocytosis;ko04145//Phagosome	K07888;K07888	-	GO:0032550//purine ribonucleoside binding	GO:0008104//protein localization;GO:0035556//intracellular signal transduction
MSTRG.36831.1	NW_011952759.1	15348	16432	-	ncbi_105396018	18367	20355	+	UPSTREAM	1934	LOC105396018	ELAV-like protein 2	-	-	-	-	-	-	-
MSTRG.36831.2	NW_011952759.1	15348	16432	-	ncbi_105396018	18367	20355	+	UPSTREAM	1934	LOC105396018	ELAV-like protein 2	-	-	-	-	-	-	-
MSTRG.36942.1	NW_011952777.1	15748	16886	-	ncbi_105396132	5	11917	+	DOWNSTREAM	3830	LOC105396132	protein split ends-like	-	-	-	-	-	-	-
MSTRG.36964.1	NW_011952780.1	7686	9548	+	ncbi_105396143	13414	25909	-	DOWNSTREAM	3865	LOC105396143	protein lingerer-like	-	-	-	-	-	-	-
MSTRG.37026.1	NW_011952791.1	35609	37218	+	ncbi_105396213	38502	48438	-	DOWNSTREAM	1283	LOC105396213	neurotrypsin-like	-	-	-	-	-	-	-
MSTRG.37073.2	NW_011952800.1	33321	35247	+	ncbi_105396262	44776	50463	+	UPSTREAM	9528	LOC105396262	nuclear hormone receptor HR96-like	-	-	-	-	-	-	-
MSTRG.37192.2	NW_011952824.1	2626	3291	-	ncbi_105396363	36	1783	-	UPSTREAM	842	LOC105396363	inositol polyphosphate multikinase-like	Metabolism;Environmental Information Processing;Metabolism	Global and overview maps;Signal transduction;Carbohydrate metabolism	ko01100//Metabolic pathways;ko04070//Phosphatidylinositol signaling system;ko00562//Inositol phosphate metabolism	K00915;K00915;K00915	-	-	-
MSTRG.37295.1	NW_011952844.1	12760	13368	+	ncbi_105396443	16075	23946	+	UPSTREAM	2706	LOC105396443	putative uncharacterized protein DDB_G0277255	-	-	-	-	-	-	-
MSTRG.37426.2	NW_011952875.1	6	5432	+	ncbi_105396573	12136	16290	-	DOWNSTREAM	6703	LOC105396573	uncharacterized LOC105396573	-	-	-	-	-	-	-
MSTRG.37512.1	NW_011952895.1	10000	10695	-	ncbi_105396632	14758	33943	+	UPSTREAM	4062	LOC105396632	probable ATP-dependent RNA helicase kurz	-	-	-	-	-	GO:0016787//hydrolase activity	-
MSTRG.37751.1	NW_011952976.1	26194	27529	+	ncbi_105396934	28216	32044	+	UPSTREAM	686	LOC105396934	protein transport protein Sec24C-like	Genetic Information Processing	Folding, sorting and degradation	ko04141//Protein processing in endoplasmic reticulum	K14007	-	-	-
MSTRG.37764.1	NW_011952980.1	16459	19099	+	ncbi_105396941	5346	8020	-	UPSTREAM	8438	LOC105396941	calcyclin-binding protein-like	Environmental Information Processing	Signal transduction	ko04310//Wnt signaling pathway	K04507	-	-	-
MSTRG.37809.2	NW_011952994.1	24802	27143	+	ncbi_105396991	14987	16396	-	UPSTREAM	8405	LOC105396991	uncharacterized LOC105396991	-	-	-	-	-	-	-
MSTRG.37809.1	NW_011952994.1	24802	27159	+	ncbi_105396991	14987	16396	-	UPSTREAM	8405	LOC105396991	uncharacterized LOC105396991	-	-	-	-	-	-	-
XR_961146.1	NW_011953052.1	3209	4655	+	ncbi_105397172	13587	15962	+	UPSTREAM	8931	LOC105397172	uncharacterized F-box/LRR-repeat protein C02F5.7-like	-	-	-	-	-	-	-
MSTRG.37981.1	NW_011953059.1	1868	3375	-	ncbi_105397185	3447	4524	-	DOWNSTREAM	71	LOC105397185	acyl-CoA-binding protein homolog	-	-	-	-	-	-	-
MSTRG.37981.1	NW_011953059.1	1868	3375	-	ncbi_105397186	5849	7992	-	DOWNSTREAM	2473	LOC105397186	putative acyl-CoA-binding protein	-	-	-	-	-	-	-
XR_961149.1	NW_011953065.1	11768	14381	+	ncbi_105397210	51	8623	-	UPSTREAM	3144	LOC105397210	protein mesh-like	-	-	-	-	GO:0031224//intrinsic component of membrane;GO:0044459//plasma membrane part;GO:0070160//occluding junction	-	GO:0031589//cell-substrate adhesion
MSTRG.38310.1	NW_011953162.1	413	1105	+	ncbi_105397395	3927	9002	+	UPSTREAM	2821	LOC105397395	circadian clock-controlled protein-like	-	-	-	-	-	-	-
MSTRG.38550.1	NW_011953266.1	4832	6616	+	ncbi_105397550	7132	11955	-	DOWNSTREAM	515	LOC105397550	alpha-2-macroglobulin receptor-associated protein-like	-	-	-	-	-	-	-
MSTRG.38591.1	NW_011953287.1	7180	8916	-	ncbi_105397574	89	5866	-	UPSTREAM	1313	LOC105397574	scaffold attachment factor B1-like	-	-	-	-	-	-	-
MSTRG.38591.1	NW_011953287.1	7180	8916	-	ncbi_105397573	6202	7097	+	DOWNSTREAM	82	LOC105397573	coiled-coil domain-containing protein 115	-	-	-	-	-	-	-
XR_961162.1	NW_011953293.1	9340	10227	+	ncbi_105397585	3515	5504	+	DOWNSTREAM	3835	LOC105397585	uncharacterized LOC105397585	-	-	-	-	-	-	-
MSTRG.38677.1	NW_011953346.1	8520	8999	+	ncbi_105397639	296	4166	+	DOWNSTREAM	4353	LOC105397639	lipoprotein lipase-like	-	-	-	-	-	-	-
MSTRG.38677.1	NW_011953346.1	8520	8999	+	ncbi_105397640	4670	8060	+	DOWNSTREAM	459	LOC105397640	pancreatic triacylglycerol lipase-like	-	-	-	-	-	-	-
