# Supplementary material for: Analysis of Long Non-Coding RNA-Mediated Regulatory Networks of Plutella xylostella in Response to Metarhizium anisopliae Infection
Source: Insects. 2022 Oct 9;13(10):916. doi: 10.3390/insects13100916 (PMC9604237; doi:10.3390/insects13100916)
Supplement: Supplementary file 1 [file insects-13-00916-s001.zip › Table S13 Prediction of lncRNAs as the precursor of miRNAs in Metarhizium anisopliae-infected Plutella xylostella fat body tissues at Px36hCK vs Px36hT.xlsx]

## Sheet: Sheet 1
Table S13 Prediction of lncRNAs as the precursor of miRNAs in Metarhizium anisopliae-infected Plutella xylostella fat body tissues at Px36hCK vs Px36hT
Query ID	Subject ID	Identity (%)	Total	Match	ql	qb	qe	sl	sb	se	Expect	Bits
pxy-mir-8497	MSTRG.33958.2	100	188	188	188	1	188	2242	788	975	e-104	373
pxy-mir-8497	MSTRG.33958.1	100	188	188	188	1	188	4035	2479	2666	e-104	373
pxy-mir-750	MSTRG.26436.3	100	92	92	92	1	92	1210	148	239	4e-47	182
pxy-mir-750	MSTRG.26436.2	100	92	92	92	1	92	1112	124	215	4e-47	182
pxy-mir-8517a	MSTRG.33958.2	100	173	173	173	1	173	2242	438	266	3e-95	343
pxy-mir-8517a	MSTRG.33958.1	100	173	173	173	1	173	4035	2129	1957	3e-95	343
pxy-mir-6497	MSTRG.45724.3	100	173	173	173	1	173	1273	918	1090	3e-95	343
pxy-mir-6497	MSTRG.45724.2	100	173	173	173	1	173	1445	1011	1183	3e-95	343
pxy-mir-6497	MSTRG.45725.1	100	173	173	173	1	173	2154	1119	947	3e-95	343
pxy-mir-6497	MSTRG.14045.1	100	94	94	94	1	94	3432	3118	3211	2e-48	186
pxy-mir-9a	MSTRG.1159.1	100	104	104	104	1	104	3633	3146	3249	3e-54	206
pxy-mir-8541	MSTRG.40041.1	100	94	94	94	1	94	689	144	237	2e-48	186
pxy-mir-750	MSTRG.35158.5	98	92	91	92	1	92	1410	674	765	9e-45	174
pxy-mir-274	MSTRG.14045.1	95	88	84	90	1	88	3432	3120	3207	3e-35	143
bmo-mir-9a	MSTRG.14045.1	95	88	84	90	1	88	3432	3120	3207	3e-35	143
lmi-mir-276	MSTRG.37673.4	91	58	53	58	1	58	1129	958	1013	2e-13	69.9
lmi-mir-276	MSTRG.37673.2	91	58	53	58	1	58	9127	7961	8016	2e-13	69.9
Note: Abbreviations: ql: query length; qb: starting position of query; qe; query termination; sl: subject length; sb: subject start position; se: subject termination position; bits: Match the score
