# Supplementary material for: Analysis of Long Non-Coding RNA-Mediated Regulatory Networks of Plutella xylostella in Response to Metarhizium anisopliae Infection
Source: Insects. 2022 Oct 9;13(10):916. doi: 10.3390/insects13100916 (PMC9604237; doi:10.3390/insects13100916)
Supplement: Supplementary file 1 [file insects-13-00916-s001.zip › Table S14 Prediction of lncRNAs as the precursor of miRNAs in Metarhizium anisopliae-infected Plutella xylostella fat body tissues at Px72hCK vs Px72hT.xlsx]

## Sheet: Sheet 1
Table S14 Prediction of lncRNAs as the precursor of miRNAs in Metarhizium anisopliae-infected Plutella xylostella fat body tissues at Px72hCK vs Px72hT.
Query ID	Subject ID	Identity (%)	Total	Match	ql	qb	qe	sl	sb	se	Expect	Bits
pxy-mir-8497	MSTRG.26631.2	100	188	188	188	1	188	1947	385	572	e-104	373
pxy-mir-8497	MSTRG.26631.1	100	188	188	188	1	188	3822	2452	2639	e-104	373
pxy-mir-750	MSTRG.20674.2	100	92	92	92	1	92	1169	135	226	3e-47	182
pxy-mir-8517a	MSTRG.26631.1	100	173	173	173	1	173	3822	2102	1930	3e-95	343
pxy-mir-6497	MSTRG.35786.3	100	173	173	173	1	173	1210	971	1143	3e-95	343
pxy-mir-750	MSTRG.27537.1	98	92	91	92	1	92	591	153	244	7e-45	174
bmo-mir-9a	MSTRG.11116.1	95	88	84	90	1	88	4721	4554	4641	3e-35	143
bmo-mir-281	MSTRG.29388.1	94	76	72	77	1	76	1135	671	746	3e-28	119
lmi-mir-276	MSTRG.29479.1	91	58	53	58	1	58	1945	779	834	2e-13	69.9
Note: Abbreviations: ql: query length; qb: starting position of query; qe; query termination; sl: subject length; sb: subject start position; se: subject termination position; bits: Match the score
